# Supplementary material
Source: MDPI journal article supplement (https://www.mdpi.com/1424-2818/15/6/707)
Supplement: s1 [file s1]

Archive with 2 entries (2 files):
- supplementary_figures.pdf
- Supplementary_tables.xlsx
