# Supplementary material
Source: MDPI journal article supplement (https://www.mdpi.com/1424-2818/15/6/707)
Supplement: s1 [file s1 › supplementary_figures.pdf]

# Supplementary Figures

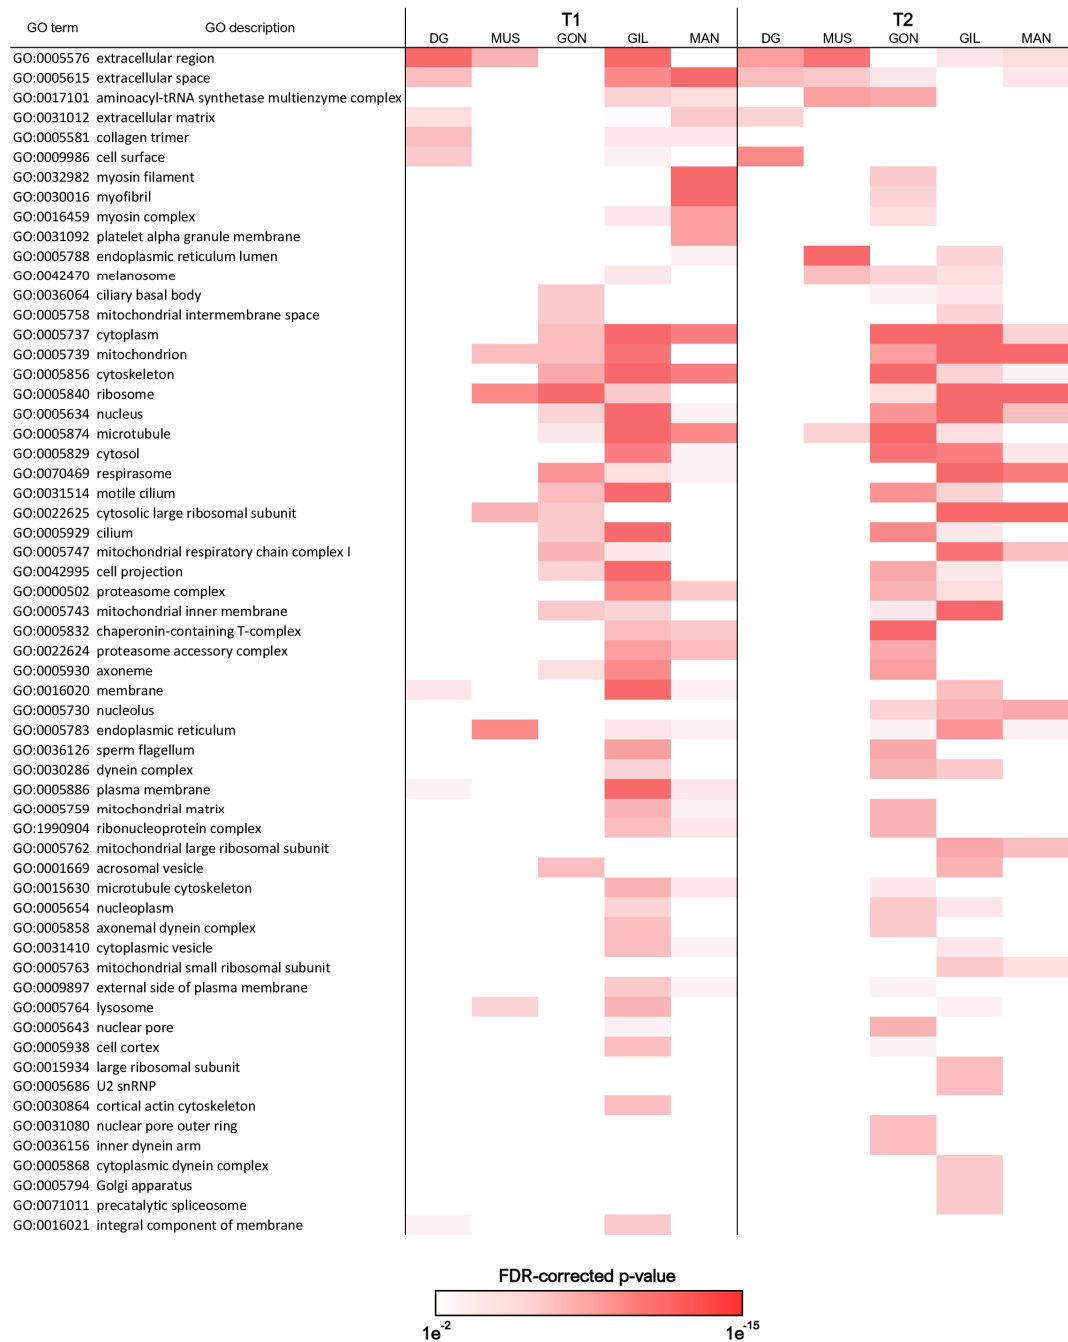

**Figure S1.** Summary of the most significantly enriched Gene Ontology cellular component terms associated with differentially expressed genes. Only the terms achieving a FDR-corrected enrichment p-value lower than  $1 \times 10^{-8}$  in at least one pairwise comparison, paired with a difference between the observed and expected number of observed DEGs associated with each GO term  $> 5$ , are shown. The complete list of all significantly enriched Gene Ontology cellular component terms is reported in **Table S4**. DG: digestive gland; MUS: adductor muscle; GON: gonads; GIL: gills; MAN: mantle.

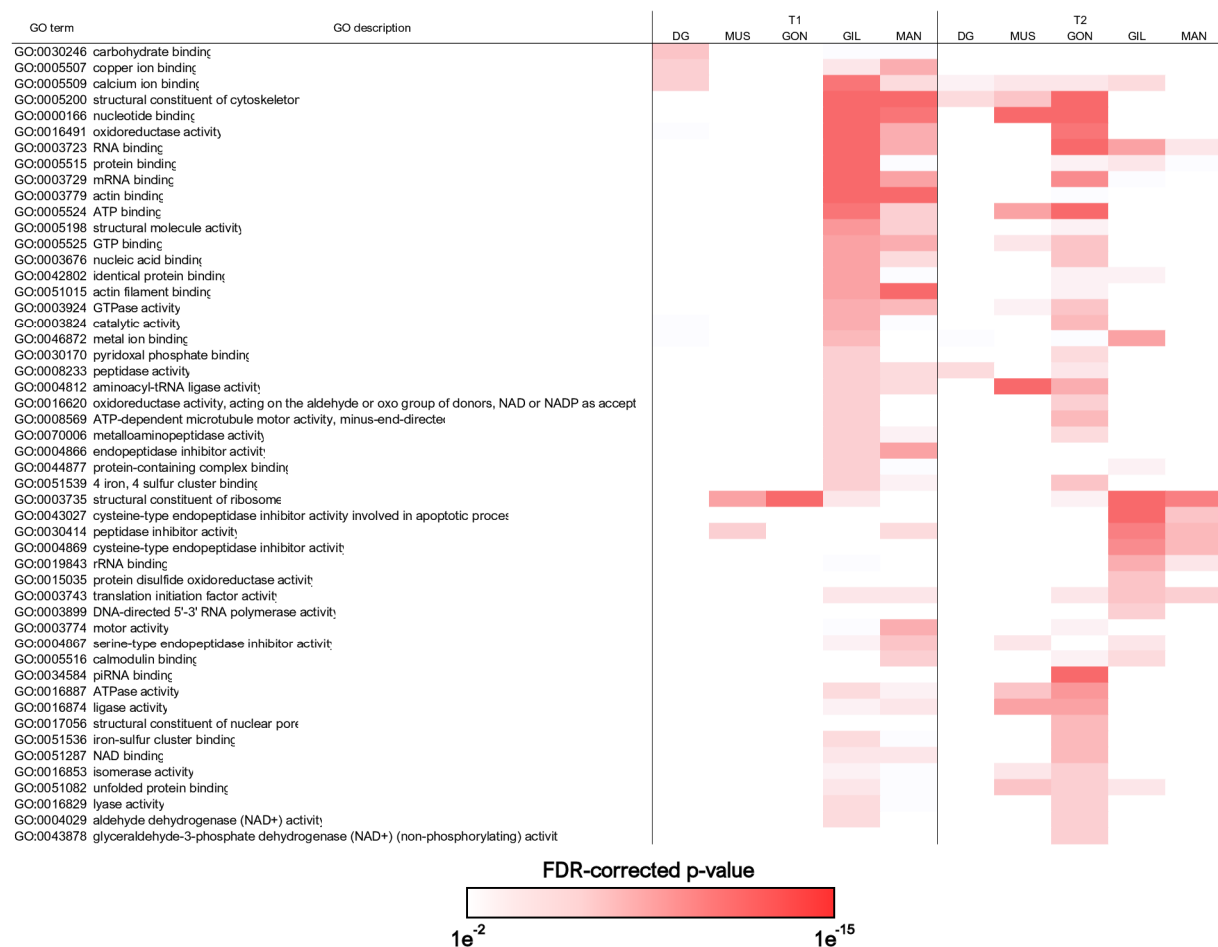

**Figure S2.** Summary of the most significantly enriched Gene Ontology molecular function terms associated with differentially expressed genes. Only the terms achieving a FDR-corrected enrichment p-value lower than  $1 \times 10^{-8}$  in at least one pairwise comparison, paired with a difference between the observed and expected number of observed DEGs associated with each GO term  $> 5$ , are shown. The complete list of all significantly enriched Gene Ontology molecular function terms is reported in **Table S5**. DG: digestive gland; MUS: adductor muscle; GON: gonads; GIL: gills; MAN: mantle.
