# Supplementary material
Source: MDPI journal article supplement (https://www.mdpi.com/1424-2818/15/6/707)
Supplement: s1 [file s1 › Supplementary_tables.xlsx]

## Sheet: Table S1
Table S1: number of clean reads used for the de novo assembly of the Congeria kusceri transcriptome, as well as for subsequent gene expression analyses
tissue	time point	number of clean reads
gills	T1	39,346,472
gonad	T1	33,792,916
mantle	T1	31,571,800
digestive gland	T1	37,461,044
adductor muscle	T1	12,871,274
gills	T2	28,986,486
gonad	T2	31,968,566
mantle	T2	34,259,546
digestive gland	T2	34,480,344
adductor muscle	T2	49,826,672

## Sheet: Table S2
Table S2: complete functional annotation of assembled Congeria kusceri contigs, including the best UniProt hit and associated description, Gene Ontology terms, Pfam domains, orthoDB assignment and description, and Reactome pathway.
transcript id	best uniprot hit	best uniprot hit id	Gene Ontology terms	UniProt definition	associated Pfam domains	orthoDB unique ID	orthoDB gene name	orthoDB gene description	reactome pathway id	reactome pathway name
TRINITY_DN101087_c0_g1_i1	sp|Q9UBF6|RBX2_HUMAN	Q9UBF6	GO:0008270; GO:0006511; GO:0051775; GO:0061663; GO:0005737; GO:0016567; GO:0031466; GO:0031461; GO:0005515; GO:0046872; GO:0005634; GO:0061630; GO:0005507; GO:0045116; GO:0097602	RING-box protein 2 OS=Homo sapiens OX=9606 GN=RNF7 PE=1 SV=1		6500_0:003d43	1587140at2759	anaphase-promoting complex subunit 11	R-HSA-8951664; R-HSA-983168	Neddylation; Antigen processing: Ubiquitination & Proteasome degradation
TRINITY_DN1011_c0_g4_i1	sp|Q8N0N3|BGBP_PENMO	Q8N0N3	GO:0001872; GO:0045087; GO:0005576; GO:0002376; GO:0004553; GO:0005975	Beta-1,3-glucan-binding protein OS=Penaeus monodon OX=6687 PE=2 SV=1		29159_0:001f86	1209387at2759	Xyloglucan endotransglucosylase/hydrolase
TRINITY_DN10112_c0_g1_i1	sp|Q32P85|DLRB2_BOVIN	Q32P85	GO:0005856; GO:0005874; GO:0005737; GO:0030286; GO:0005813; GO:0007018; GO:0005868; GO:0045505	Dynein light chain roadblock-type 2 OS=Bos taurus OX=9913 GN=DYNLRB2 PE=3 SV=1	PF13737.6	10224_0:004c69	1512428at2759	Dynein light chain roadblock	R-BTA-5620924	Intraflagellar transport
TRINITY_DN101150_c0_g1_i1	sp|O01391|UCHL_APLCA	O01391	GO:0006511; GO:0008234; GO:0016787; GO:0006508; GO:0005737; GO:0004843; GO:0008233; GO:0018215	Ubiquitin carboxyl-terminal hydrolase OS=Aplysia californica OX=6500 GN=UCH PE=2 SV=1		225164_0:003198	1013351at2759	Ubiquitin carboxyl-terminal hydrolase
TRINITY_DN10122_c0_g1_i17	sp|Q07816|B2CL1_CHICK	Q07816	GO:0005741; GO:0005737; GO:0071230; GO:0005813; GO:0016021; GO:0016020; GO:0046982; GO:0007093; GO:0042803; GO:0006915; GO:0008630; GO:0005634; GO:0045202; GO:0031410; GO:0005739; GO:2001243; GO:0005856; GO:0071312; GO:0032465; GO:0097284; GO:0097192; GO:0071480; GO:0042981; GO:0030054	Bcl-2-like protein 1 OS=Gallus gallus OX=9031 GN=BCL2L1 PE=2 SV=2	PF00452.19	6573_0:005947	1218929at2759	apoptosis regulator Bcl-2	R-GGA-111453; R-GGA-844455	BH3-only proteins associate with and inactivate anti-apoptotic BCL-2 members; The NLRP1 inflammasome
TRINITY_DN101976_c0_g1_i1	sp|Q2M2S5|COA6_BOVIN	Q2M2S5	GO:0045277; GO:0005758; GO:0005886; GO:0042774; GO:0005739; GO:0008535; GO:0005507	Cytochrome c oxidase assembly factor 6 homolog OS=Bos taurus OX=9913 GN=COA6 PE=3 SV=1		225164_0:000a9f	11875at6447	cytochrome c oxidase assembly factor 6 homolog
TRINITY_DN102017_c0_g1_i1	sp|Q8TC29|ENKUR_HUMAN	Q8TC29	GO:0097728; GO:0097228; GO:0017124; GO:0042995; GO:0031514; GO:0005515; GO:0001669; GO:0030317; GO:0005929; GO:0005516; GO:0061966; GO:0097729	Enkurin OS=Homo sapiens OX=9606 GN=ENKUR PE=2 SV=1		6573_0:001424	1449984at2759	enkurin
TRINITY_DN102419_c0_g1_i1	sp|Q02368|NDUB7_BOVIN	Q02368	GO:0070469; GO:0032981; GO:0005743; GO:0005758; GO:0008137; GO:0005747; GO:0003954; GO:0016020; GO:0005739; GO:0022900	NADH dehydrogenase [ubiquinone] 1 beta subcomplex subunit 7 OS=Bos taurus OX=9913 GN=NDUFB7 PE=1 SV=2	PF05051.13; PF05676.13; PF08583.10; PF15369.6; PF02297.17	37653_0:000057	11435at6447	NADH dehydrogenase	R-BTA-611105; R-BTA-6799198	Respiratory electron transport; Complex I biogenesis
TRINITY_DN103068_c0_g1_i1	sp|O15457|MSH4_HUMAN	O15457	GO:0007292; GO:0005694; GO:0000166; GO:0003677; GO:0007283; GO:0005524; GO:0051321; GO:0007131; GO:0007129; GO:0001541; GO:0030983; GO:0005515; GO:0000795; GO:0006298; GO:0005634; GO:0000793; GO:0005713; GO:0000794	MutS protein homolog 4 OS=Homo sapiens OX=9606 GN=MSH4 PE=1 SV=2		48498_0:000415	138168at2759	DNA mismatch repair protein MutS, core	R-HSA-912446	Meiotic recombination
TRINITY_DN10353_c0_g1_i3	sp|Q9IA76|RL31_PAROL	Q9IA76	GO:0003735; GO:0005840; GO:0006412	60S ribosomal protein L31 OS=Paralichthys olivaceus OX=8255 GN=rpl31 PE=2 SV=1	PF01198.19	6565_0:002203	10096at1206795	uncharacterized protein LOC105321548
TRINITY_DN103896_c0_g1_i1						6565_0:001a30	1411258at2759	uncharacterized protein LOC109462727
TRINITY_DN104397_c0_g1_i1	sp|Q9VAI1|CIA30_DROME	Q9VAI1	GO:0010257; GO:0032981; GO:0042594; GO:0005739; GO:0051082; GO:0055093; GO:0007005; GO:1990204; GO:0006120; GO:0001666; GO:0009408	Complex I intermediate-associated protein 30, mitochondrial OS=Drosophila melanogaster OX=7227 GN=CIA30 PE=2 SV=1	PF08547.12; PF03425.13	6412_0:003d65	1563319at2759	complex I intermediate-associated protein 30, mitochondrial	R-DME-6799198	Complex I biogenesis
TRINITY_DN104553_c0_g1_i1					PF07222.12
TRINITY_DN10466_c0_g1_i1	sp|Q8K3J5|ZN131_MOUSE	Q8K3J5	GO:0001227; GO:0000122; GO:0003677; GO:0001228; GO:0005654; GO:0000978; GO:0000981; GO:0046872; GO:0045944; GO:0005634; GO:0045111; GO:0006357; GO:0043565	Zinc finger protein 131 OS=Mus musculus OX=10090 GN=Znf131 PE=1 SV=1	PF09723.10; PF00096.26; PF18112.1; PF12171.8; PF01722.18; PF13909.6; PF13912.6; PF00346.19; PF12874.7; PF05605.12; PF13894.6; PF18445.1; PF06676.11; PF13465.6	246812_0:00244e	130237at33208	Zinc finger C2H2 superfamily	R-MMU-3899300	SUMOylation of transcription cofactors
TRINITY_DN105_c0_g1_i3	sp|Q9P0U1|TOM7_HUMAN	Q9P0U1	GO:0005742; GO:0008320; GO:0005741; GO:0006626; GO:0016236; GO:0015031; GO:0016021; GO:0030150; GO:0005515; GO:0098779; GO:0016020; GO:0031647; GO:0005739; GO:1903955	Mitochondrial import receptor subunit TOM7 homolog OS=Homo sapiens OX=9606 GN=TOMM7 PE=1 SV=1		110193_0:00297f	136786at33392	mitochondrial import receptor subunit TOM7 homolog	R-HSA-1268020; R-HSA-5205685	Mitochondrial protein import; Pink/Parkin Mediated Mitophagy
TRINITY_DN10508_c0_g2_i1	sp|Q6AZJ9|RS21_XENLA	Q6AZJ9	GO:0005791; GO:0003735; GO:0022627; GO:0005783; GO:0005737; GO:0002181; GO:0005829; GO:0005840; GO:0006412; GO:0042788	40S ribosomal protein S21 OS=Xenopus laevis OX=8355 GN=rps21 PE=3 SV=1		6500_0:0003df	10831at6447	40S ribosomal protein S21
TRINITY_DN105325_c0_g1_i1					PF06524.12; PF11705.8; PF15387.6; PF02957.15	7574_0:0002cd	11243at1206795	DNA-directed RNA polymerase III subunit RPC7-like
TRINITY_DN1056_c0_g2_i1	sp|O43805|SSNA1_HUMAN	O43805	GO:0005829; GO:0005737; GO:0005856; GO:0000086; GO:0005634	Sjoegren syndrome nuclear autoantigen 1 OS=Homo sapiens OX=9606 GN=SSNA1 PE=1 SV=2	PF04888.12; PF12072.8; PF17675.1; PF07851.13; PF16566.5; PF17253.2; PF08317.11; PF02403.22; PF13118.6; PF00482.23; PF05266.14; PF13982.6; PF07889.12; PF11559.8; PF06295.12; PF13863.6; PF11932.8; PF16446.5	6573_0:004fda	10565at6447	Sjoegren syndrome nuclear autoantigen 1 homolog	R-HSA-2565942; R-HSA-380259; R-HSA-380270; R-HSA-380284; R-HSA-380320; R-HSA-5620912; R-HSA-8854518	Regulation of PLK1 Activity at G2/M Transition; Loss of Nlp from mitotic centrosomes; Recruitment of mitotic centrosome proteins and complexes; Loss of proteins required for interphase microtubule organization from the centrosome; Recruitment of NuMA to mitotic centrosomes; Anchoring of the basal body to the plasma membrane; AURKA Activation by TPX2
TRINITY_DN106038_c0_g1_i1	sp|Q3KQ77|EFCB1_XENLA	Q3KQ77	GO:0005509; GO:0046872	EF-hand calcium-binding domain-containing protein 1 OS=Xenopus laevis OX=8355 GN=efcab1 PE=2 SV=1	PF12125.8; PF13405.6; PF09069.11; PF13499.6; PF13202.6; PF10591.9; PF13833.6; PF00036.32	6565_0:007296	1331864at2759	EF-hand calcium-binding domain-containing protein 1
TRINITY_DN106445_c0_g1_i1	sp|A6NNX1|RIAD1_HUMAN	A6NNX1		RIIa domain-containing protein 1 OS=Homo sapiens OX=9606 GN=RIIAD1 PE=4 SV=1		29159_0:0046f2	10533at6447	RIIa domain-containing protein 1-like
TRINITY_DN10718_c0_g1_i1	sp|Q9VRV7|SF3B6_DROME	Q9VRV7	GO:0071011; GO:0008380; GO:0003676; GO:0071013; GO:0003729; GO:0003723; GO:0005689; GO:0005686; GO:0006397; GO:0005634; GO:0000398; GO:0005684	Splicing factor 3B subunit 6 OS=Drosophila melanogaster OX=7227 GN=Sf3b6 PE=1 SV=1	PF13893.6; PF00076.22; PF11835.8	6573_0:001bc1	10095at1206795	splicing factor 3B subunit 6-like protein
TRINITY_DN107390_c0_g1_i1	sp|B9EJX3|VAFNB_MOUSE	B9EJX3	GO:0008150; GO:0005575; GO:0003674	Protein ATP6V1FNB OS=Mus musculus OX=10090 GN=ATp6v1fnb PE=2 SV=1	PF10458.9; PF14886.6	29159_0:005ac0	1598660at2759	uncharacterized protein LOC105608858
TRINITY_DN10769_c0_g1_i1	sp|Q568D2|CF161_DANRE	Q568D2	GO:0031514; GO:0060271; GO:0003674	Cilia- and flagella-associated protein 161 OS=Danio rerio OX=7955 GN=cfap161 PE=2 SV=1		29159_0:005f59	404512at33208	cilia- and flagella-associated protein 161
TRINITY_DN10821_c0_g3_i2	sp|Q3T0X9|DPOD4_BOVIN	Q3T0X9	GO:0000731; GO:0043625; GO:0006281; GO:0003887; GO:0006261; GO:0006974; GO:0005634; GO:0071897; GO:0006260	DNA polymerase delta subunit 4 OS=Bos taurus OX=9913 GN=POLD4 PE=1 SV=1	PF04081.13; PF06516.11	6526_0:0030c6	11651at6447	DNA polymerase delta subunit 4-like	R-BTA-110314; R-BTA-174411; R-BTA-174414; R-BTA-174417; R-BTA-174437; R-BTA-5651801; R-BTA-5656169; R-BTA-5685942; R-BTA-5696397; R-BTA-5696400; R-BTA-6782135; R-BTA-6782210; R-BTA-69091; R-BTA-69166; R-BTA-69183	Recognition of DNA damage by PCNA-containing replication complex; Polymerase switching on the C-strand of the telomere; Processive synthesis on the C-strand of the telomere; Telomere C-strand (Lagging Strand) Synthesis; Removal of the Flap Intermediate from the C-strand; PCNA-Dependent Long Patch Base Excision Repair; Termination of translesion DNA synthesis; HDR through Homologous Recombination …
TRINITY_DN10826_c0_g1_i1					PF13207.6; PF00406.22; PF17784.1	29159_0:000f71	10862at6447	uncharacterized protein LOC111100385
TRINITY_DN10900_c0_g1_i2	sp|Q3ZC75|AT5G3_BOVIN	Q3ZC75	GO:0008289; GO:0015078; GO:0031966; GO:0000276; GO:0005739; GO:0033177; GO:0046933; GO:0005753; GO:0045263; GO:0016021; GO:0015986; GO:1902600; GO:0006811; GO:0016020	ATP synthase F(0) complex subunit C3, mitochondrial OS=Bos taurus OX=9913 GN=ATP5MC3 PE=2 SV=1	PF17508.2; PF07332.11; PF00137.21	7425_0:001d5e	133479at33392	ATP synthase lipid-binding protein, mitochondrial	R-BTA-1268020; R-BTA-163210; R-BTA-8949613	Mitochondrial protein import; Formation of ATP by chemiosmotic coupling; Cristae formation
TRINITY_DN10995_c0_g1_i4					PF01661.21; PF17787.1
TRINITY_DN1102_c1_g1_i1					PF01160.18
TRINITY_DN11054_c0_g2_i1						6565_0:0017a5	355at6447	LOW QUALITY PROTEIN: cilia- and flagella-associated protein 57-like
TRINITY_DN11074_c0_g1_i1						7574_0:004ff7	1626262at2759	uncharacterized protein LOC100888786
TRINITY_DN11130_c0_g1_i1	sp|Q4V7T8|ROP1L_XENLA	Q4V7T8	GO:0031514; GO:0042995; GO:0005929	Ropporin-1-like protein OS=Xenopus laevis OX=8355 GN=ropn1l PE=2 SV=1	PF02197.17	29159_0:003184	1316863at2759	ropporin-1-like protein
TRINITY_DN11203_c0_g1_i3	sp|O70608|SYCP2_RAT	O70608	GO:0009566; GO:0005694; GO:0003677; GO:0051321; GO:0048808; GO:0000795; GO:0051301; GO:0005634; GO:0007143; GO:0000800; GO:0043066; GO:0007140; GO:0007049; GO:0009887	Synaptonemal complex protein 2 OS=Rattus norvegicus OX=10116 GN=Sycp2 PE=1 SV=1	PF04803.12; PF18584.1	29159_0:005785	10549at6447	uncharacterized protein LOC106064643
TRINITY_DN1126_c0_g3_i1	sp|P28338|GSTT1_MUSDO	P28338	GO:0004364; GO:0006749; GO:0016740	Glutathione S-transferase 1 OS=Musca domestica OX=7370 GN=Gst1 PE=1 SV=1	PF17171.4; PF02798.20; PF13410.6; PF13409.6; PF00043.25; PF13417.6; PF14497.6	6565_0:0018d9	1231780at2759	Glutathione S-transferase
TRINITY_DN11268_c2_g1_i14	sp|Q6ZVK8|NUD18_HUMAN	Q6ZVK8	GO:0046712; GO:0046067; GO:0016787; GO:0000287; GO:0034656; GO:0044717; GO:0046057; GO:0005515; GO:0046872; GO:0005829; GO:0044716; GO:0044715; GO:0009117; GO:0017110	8-oxo-dGDP phosphatase NUDT18 OS=Homo sapiens OX=9606 GN=NUDT18 PE=1 SV=3	PF00293.28	37653_0:0038a3	1327589at2759	8-oxo-dGDP phosphatase NUDT18
TRINITY_DN11307_c0_g1_i5	sp|Q53EV4|LRC23_HUMAN	Q53EV4	GO:0008150; GO:0005737; GO:0005575; GO:0005515; GO:0005829; GO:0003674	Leucine-rich repeat-containing protein 23 OS=Homo sapiens OX=9606 GN=LRRC23 PE=2 SV=2	PF13516.6; PF00560.33; PF14580.6; PF13855.6; PF12799.7; PF05285.12	6565_0:004d08	1105813at2759	leucine-rich repeat-containing protein 23
TRINITY_DN1131_c0_g1_i2	sp|D4A2Z2|EPPI_RAT	D4A2Z2	GO:0010951; GO:0010466; GO:0030414; GO:0004867; GO:0042742; GO:0005737; GO:1901318; GO:0005576; GO:0009986; GO:0001669; GO:0090281; GO:0005615; GO:0032991	Eppin OS=Rattus norvegicus OX=10116 GN=Eppin PE=3 SV=1		6850_0:002c6f	1009074at2759	Tissue factor pathway inhibitor	R-RNO-6803157	Antimicrobial peptides
TRINITY_DN11316_c0_g1_i8					PF00059.21
TRINITY_DN11325_c0_g1_i2					PF15696.5	29159_0:004df5	1776491at2759	uncharacterized protein LOC105347417
TRINITY_DN11400_c0_g1_i2					PF00686.19; PF02936.14
TRINITY_DN11465_c0_g1_i1						32264_0:00087c	11548at6933	1,2-dihydroxy-3-keto-5-methylthiopentene dioxygenase
TRINITY_DN11483_c0_g1_i1						29159_0:002d40	1310184at2759	Predicted protein
TRINITY_DN11483_c1_g2_i1						29159_0:002d40	1310184at2759	Predicted protein
TRINITY_DN11483_c1_g3_i1						29159_0:002d40	1310184at2759	Predicted protein
TRINITY_DN1149_c0_g1_i4					PF13160.6	6565_0:00295b	11386at6447	uncharacterized protein LOC110449379
TRINITY_DN1153_c0_g1_i10	sp|Q6IR68|THA11_XENLA	Q6IR68	GO:0008270; GO:0003677; GO:0046872; GO:0005634	THAP domain-containing protein 11 OS=Xenopus laevis OX=8355 GN=thap11 PE=2 SV=2	PF13613.6; PF13359.6; PF05485.12	7574_0:0000b8	13929at1206795	uncharacterized protein LOC106151426
TRINITY_DN11588_c0_g1_i1						29159_0:002339	10049at1206795	uncharacterized protein LOC110465423
TRINITY_DN11593_c0_g2_i1	sp|P07031|ACYP2_CHICK	P07031	GO:0003998; GO:0016787	Acylphosphatase-2 OS=Gallus gallus OX=9031 GN=ACYP2 PE=1 SV=2		29159_0:0008da	11384at6447	Acylphosphatase
TRINITY_DN11598_c0_g2_i1						69820_0:00059e	1268539at2759	A0A2N1NRZ3_9GLOM
TRINITY_DN11600_c0_g1_i1	sp|Q9H0I2|ENKD1_HUMAN	Q9H0I2	GO:0015630; GO:0005515; GO:0005881	Enkurin domain-containing protein 1 OS=Homo sapiens OX=9606 GN=ENKD1 PE=1 SV=1	PF13864.6	29159_0:004d11	1383928at2759	enkurin domain-containing protein 1
TRINITY_DN1164_c0_g1_i11					PF15112.6; PF18731.1; PF05791.11
TRINITY_DN11701_c0_g2_i1					PF06510.11
TRINITY_DN11809_c0_g1_i1					PF00038.21; PF16331.5; PF10473.9; PF02183.18; PF10506.9; PF07926.12	29159_0:001b9e	12460at6447	girdin
TRINITY_DN11879_c0_g1_i2	sp|O60513|B4GT4_HUMAN	O60513	GO:0016757; GO:0018146; GO:0005975; GO:0016740; GO:0016021; GO:0005794; GO:0046872; GO:0006486; GO:0032580; GO:0016020; GO:0008378; GO:0003945; GO:0006643; GO:0000139	Beta-1,4-galactosyltransferase 4 OS=Homo sapiens OX=9606 GN=B4GALT4 PE=1 SV=1	PF13733.6; PF02709.14; PF13632.6	64838_0:0013c1	108489at50557	Beta-1,4-N-acetylgalactosaminyltransferase bre-4	R-HSA-2022854; R-HSA-975577	Keratan sulfate biosynthesis; N-Glycan antennae elongation
TRINITY_DN12002_c0_g1_i8	sp|Q96A49|SYAP1_HUMAN	Q96A49	GO:0030424; GO:0038203; GO:0045211; GO:0048471; GO:0045600; GO:0042734; GO:0043204; GO:0005515; GO:0005794; GO:0030426; GO:0005634; GO:0030425; GO:0032869; GO:0071902; GO:0071364	Synapse-associated protein 1 OS=Homo sapiens OX=9606 GN=SYAP1 PE=1 SV=1	PF03909.17	29159_0:00254a	340211at33208	synapse-associated protein 1
TRINITY_DN12048_c0_g1_i8						6573_0:00593e	13012at6447	uncharacterized protein LOC110443135
TRINITY_DN12081_c0_g1_i1	sp|Q9CXL3|CG050_MOUSE	Q9CXL3	GO:0008150; GO:0005575	Uncharacterized protein C7orf50 homolog OS=Mus musculus OX=10090 PE=1 SV=3	PF10180.9	6565_0:00151b	11858at6447	uncharacterized protein C7orf50 homolog
TRINITY_DN12254_c0_g1_i1					PF03227.16	43151_0:0016fa	106790at33392	AGAP009614-PA
TRINITY_DN12349_c0_g2_i1						294128_0:0022d1	14698at6657	uncharacterized protein LOC108680829
TRINITY_DN12363_c0_g1_i2	sp|Q8TD19|NEK9_HUMAN	Q8TD19	GO:0000166; GO:0106310; GO:0005524; GO:0005737; GO:0004674; GO:0007077; GO:0106311; GO:0016310; GO:0007052; GO:0005515; GO:0005634; GO:0005829; GO:0007049	Serine/threonine-protein kinase Nek9 OS=Homo sapiens OX=9606 GN=NEK9 PE=1 SV=2		6500_0:004819	1062377at2759	Regulator of chromosome condensation 1/beta-lactamase-inhibitor protein II	R-HSA-2980767; R-HSA-3301854	Activation of NIMA Kinases NEK9, NEK6, NEK7; Nuclear Pore Complex (NPC) Disassembly
TRINITY_DN12528_c0_g1_i1	sp|P42568|AF9_HUMAN	P42568	GO:0005694; GO:2000096; GO:0008023; GO:0003677; GO:0090090; GO:0006368; GO:0070577; GO:1902275; GO:0140030; GO:2000035; GO:0005634; GO:0060218; GO:0042393; GO:0003682; GO:0045893	Protein AF-9 OS=Homo sapiens OX=9606 GN=MLLT3 PE=1 SV=2	PF03366.16; PF05887.11; PF04407.12	6565_0:003566	10036at6447	protein AF-9-like	R-HSA-112382; R-HSA-674695; R-HSA-75955	Formation of RNA Pol II elongation complex ; RNA Polymerase II Pre-transcription Events; RNA Polymerase II Transcription Elongation
TRINITY_DN12558_c0_g1_i2	sp|P04464|CALM_WHEAT	P04464	GO:0005509; GO:0005737; GO:0046872; GO:0019904	Calmodulin OS=Triticum aestivum OX=4565 PE=1 SV=3	PF12763.7; PF17743.1; PF00804.25; PF08976.11; PF17959.1; PF05042.13; PF14924.6; PF06819.11; PF13405.6; PF14658.6; PF13499.6; PF05099.13; PF13202.6; PF13833.6; PF00036.32	128390_0:001261	11376at9205	calmodulin-like protein 3
TRINITY_DN12575_c0_g1_i1	sp|Q9NX55|HYPK_HUMAN	Q9NX55	GO:0047485; GO:0005654; GO:0005737; GO:0005515; GO:0005634; GO:0050821; GO:0015630; GO:0043066; GO:0032991	Huntingtin-interacting protein K OS=Homo sapiens OX=9606 GN=HYPK PE=1 SV=2	PF09781.9	6500_0:0035b8	11417at6447	huntingtin-interacting protein K
TRINITY_DN12634_c0_g1_i1					PF07679.16; PF13927.6
TRINITY_DN12685_c0_g1_i6	sp|P56394|COX17_MOUSE	P56394	GO:0008047; GO:0005758; GO:0005737; GO:0005739; GO:0016531; GO:0046872; GO:1903136; GO:0033617; GO:1904960; GO:0008284; GO:0005507	Cytochrome c oxidase copper chaperone OS=Mus musculus OX=10090 GN=Cox17 PE=1 SV=2		6412_0:003a59	1621529at2759	cytochrome c oxidase copper chaperone
TRINITY_DN12763_c0_g1_i1						29159_0:002ecc	1553369at2759	Transposable element Tc1 transposase
TRINITY_DN12919_c0_g1_i1	sp|B7YZV4|PDE1_DROME	B7YZV4	GO:0060179; GO:0046058; GO:0016787; GO:0048101; GO:0046068; GO:0007165; GO:0004114; GO:0004115; GO:0007610; GO:0046872; GO:0047555; GO:0008081; GO:0005516; GO:0005615; GO:0032504	Calcium/calmodulin-dependent 3',5'-cyclic nucleotide phosphodiesterase 1 OS=Drosophila melanogaster OX=7227 GN=Pde1c PE=1 SV=1	PF00233.19; PF06459.12; PF08499.12	6573_0:000107	2256at6447	Phosphodiesterase	R-DME-111957; R-DME-418457; R-DME-418555	Cam-PDE 1 activation; cGMP effects; G alpha (s) signalling events
TRINITY_DN12945_c0_g3_i1					PF17243.2; PF05725.12	6573_0:002fd9
TRINITY_DN12961_c0_g3_i1	sp|Q9YGL1|SPD1B_XENLA	Q9YGL1	GO:0030332; GO:0045737; GO:0051321; GO:0019901; GO:0007275; GO:0001556; GO:0006397; GO:0051446; GO:0005634; GO:0008315; GO:0006378; GO:0000187; GO:0007049	Speedy protein 1-B OS=Xenopus laevis OX=8355 GN=spdya-b PE=1 SV=1	PF12972.7; PF11357.8	29159_0:004a78	1460440at2759	speedy protein A-like isoform X1
TRINITY_DN12987_c0_g1_i1	sp|B6LS00|U728_BRAFL	B6LS00		UPF0728 protein OS=Branchiostoma floridae OX=7739 GN=BRAFLDRAFT_270831 PE=3 SV=1	PF09237.11; PF15092.6	225164_0:0006b9	11431at6447	UPF0728 protein-like
TRINITY_DN13053_c0_g1_i1	sp|Q494R4|CC153_HUMAN	Q494R4	GO:0042802; GO:0005515	Coiled-coil domain-containing protein 153 OS=Homo sapiens OX=9606 GN=CCDC153 PE=1 SV=2	PF08824.10; PF08354.10; PF11285.8; PF02601.15; PF07889.12; PF08339.10; PF09787.9; PF13339.6; PF06103.11; PF12718.7	7741_0:0035be	1357888at2759	coiled-coil domain-containing protein 153
TRINITY_DN13096_c0_g1_i2	sp|Q66JD7|ACBD6_XENTR	Q66JD7	GO:0000062; GO:0008289; GO:0005737	Acyl-CoA-binding domain-containing protein 6 OS=Xenopus tropicalis OX=8364 GN=acbd6 PE=2 SV=1	PF00023.30; PF13637.6; PF13857.6; PF12796.7; PF13606.6; PF01583.20; PF00887.19	225164_0:003291	1575996at2759	acyl-CoA-binding domain-containing protein 6
TRINITY_DN13165_c0_g1_i2					PF08702.10; PF04871.13; PF14932.6; PF11740.8; PF04899.12; PF05064.13; PF00038.21
TRINITY_DN1321_c0_g1_i12	sp|P60519|GBRL2_BOVIN	P60519	GO:0070972; GO:0006891; GO:0051117; GO:0000149; GO:0000422; GO:0000045; GO:0005783; GO:0032781; GO:0016236; GO:0006995; GO:0031625; GO:0015031; GO:0005776; GO:0005737; GO:0005794; GO:0005829; GO:0006914; GO:0016020; GO:0000421; GO:0031410; GO:0000139	Gamma-aminobutyric acid receptor-associated protein-like 2 OS=Bos taurus OX=9913 GN=GABARAPL2 PE=1 SV=1	PF03098.15	29159_0:001e03	1508198at2759	Autophagy-related protein
TRINITY_DN13225_c0_g1_i2	sp|O35817|AKA14_RAT	O35817	GO:0007283; GO:0035686; GO:0005737; GO:0005930; GO:0034237; GO:0005952; GO:0051018	A-kinase anchor protein 14 OS=Rattus norvegicus OX=10116 GN=Akap14 PE=2 SV=1	PF14469.6; PF05193.21; PF16495.5	6565_0:00468e	1552956at2759	A-kinase anchor protein 14
TRINITY_DN1323_c0_g1_i6	sp|Q7KVA1|XYLT_DROME	Q7KVA1	GO:0016757; GO:0050650; GO:0005783; GO:0005789; GO:0015012; GO:0016740; GO:0030166; GO:0030204; GO:0016021; GO:0042732; GO:0030158; GO:0005794; GO:0046872; GO:0016020; GO:0030201; GO:0000139	Xylosyltransferase oxt OS=Drosophila melanogaster OX=7227 GN=oxt PE=2 SV=1		6573_0:002bf8	13012at6447	uncharacterized protein LOC110443135	R-DME-1971475	A tetrasaccharide linker sequence is required for GAG synthesis
TRINITY_DN1323_c0_g2_i2					PF05961.11
TRINITY_DN1324_c0_g1_i8	sp|Q5XHC1|CD047_XENLA	Q5XHC1	GO:0005815; GO:0005813; GO:0005737; GO:0005856	UPF0602 protein C4orf47 homolog OS=Xenopus laevis OX=8355 PE=2 SV=1	PF15239.6; PF15828.5	29159_0:0052a6	1015843at2759	UPF0602 protein C4orf47 homolog
TRINITY_DN1331_c0_g1_i2	sp|Q0VBY0|CMC4_BOVIN	Q0VBY0	GO:0005758; GO:0005739	Cx9C motif-containing protein 4 OS=Bos taurus OX=9913 GN=CMC4 PE=3 SV=1		225164_0:0055e4	1633942at2759	cx9C motif-containing protein 4
TRINITY_DN13364_c0_g2_i1					PF10184.9; PF01496.19
TRINITY_DN13581_c0_g1_i1	sp|Q8QFR4|MD2L2_XENLA	Q8QFR4	GO:0043393; GO:0031397; GO:0005856; GO:0042177; GO:0042772; GO:0005819; GO:0007049; GO:0005680; GO:0005737; GO:0031145; GO:0005634; GO:0009794; GO:1904667; GO:0042802; GO:0051301; GO:0016035; GO:0006974; GO:0033138; GO:0045893	Mitotic spindle assembly checkpoint protein MAD2B OS=Xenopus laevis OX=8355 GN=mad2l2 PE=1 SV=1	PF02301.18	29159_0:001d3b	1630737at2759	mitotic spindle assembly checkpoint protein MAD2B
TRINITY_DN13673_c0_g1_i1					PF14362.6; PF06810.11; PF05791.11; PF09177.11; PF05667.11; PF17749.1; PF10146.9; PF14662.6; PF06160.12; PF01920.20; PF05615.13; PF12718.7; PF08702.10; PF00992.20; PF12329.8; PF00170.21; PF07851.13; PF15047.6; PF07544.13; PF00261.20; PF04977.15; PF00769.19; PF11932.8; PF14584.6; PF13949.6; PF09969.9; PF05531.12; PF08614.11; PF07160.12; PF03938.14; PF14772.6; PF10241.9; PF13870.6; PF08647.11; PF053…
TRINITY_DN1372_c0_g1_i4	sp|Q7F0J0|CML13_ORYSJ	Q7F0J0	GO:0005509; GO:0000278; GO:0046872; GO:0005814	Probable calcium-binding protein CML13 OS=Oryza sativa subsp. japonica OX=39947 GN=CML13 PE=2 SV=1	PF12763.7; PF13405.6; PF14658.6; PF13499.6; PF00036.32; PF13202.6; PF10591.9; PF13833.6; PF05042.13	29159_0:0005cf	1340191at2759	EF-hand domain
TRINITY_DN1380_c0_g1_i8	sp|Q1RMK1|FA92B_BOVIN	Q1RMK1	GO:0005737; GO:0042995; GO:0030030; GO:0005856; GO:0005814	Protein FAM92B OS=Bos taurus OX=9913 GN=FAM92B PE=2 SV=1	PF09026.10; PF14362.6; PF10482.9; PF06524.12; PF16746.5; PF03153.13; PF06299.12; PF06730.11; PF05327.11; PF09325.10	6573_0:0017eb	1324464at2759	protein FAM92A1
TRINITY_DN13924_c0_g1_i2	sp|A5F4E5|UBIE_VIBC3	A5F4E5	GO:0043333; GO:0009060; GO:0032259; GO:0102027; GO:0016740; GO:0102094; GO:0043770; GO:0102955; GO:0006744; GO:0009234; GO:0008168; GO:0008425	Ubiquinone/menaquinone biosynthesis C-methyltransferase UbiE OS=Vibrio cholerae serotype O1 (strain ATCC 39541 / Classical Ogawa 395 / O395) OX=345073 GN=ubiE PE=3 SV=1	PF13624.6; PF08241.12; PF01135.19; PF08242.12; PF13649.6; PF01209.18; PF04839.13; PF13489.6; PF02353.20; PF13847.6; PF08123.13	29159_0:004488	10148at1206795	uncharacterized protein LOC111126164
TRINITY_DN13976_c0_g1_i20					PF13540.6
TRINITY_DN13986_c0_g1_i1	sp|Q6AXN0|UBAD1_RAT	Q6AXN0		UBA-like domain-containing protein 1 OS=Rattus norvegicus OX=10116 GN=Ubald1 PE=2 SV=1	PF03943.13; PF03088.16; PF14555.6	6573_0:001f63	10220at1206795	UBA-like domain-containing protein 1
TRINITY_DN1400_c0_g1_i1	sp|Q5D016|PFD1_DANRE	Q5D016	GO:0044183; GO:0016272; GO:0005737; GO:0006457; GO:0051082	Prefoldin subunit 1 OS=Danio rerio OX=7955 GN=pfdn1 PE=2 SV=1	PF03148.14; PF03194.15; PF15905.5; PF16275.5; PF01920.20; PF15066.6	225164_0:0051c5	10997at6447	prefoldin subunit 1-like
TRINITY_DN142_c0_g2_i1					PF08410.10
TRINITY_DN14206_c1_g1_i1	sp|A0A096MJZ0|DNAL1_RAT	A0A096MJZ0	GO:0043014; GO:0005856; GO:0045504; GO:0005874; GO:0042995; GO:0005737; GO:0030286; GO:0036158	Dynein light chain 1, axonemal OS=Rattus norvegicus OX=10116 GN=Dnal1 PE=1 SV=1	PF15801.5; PF13516.6; PF00560.33; PF14580.6; PF13855.6; PF12799.7	29159_0:001675	1395642at2759	dynein light chain 1, axonemal
TRINITY_DN14233_c0_g1_i4					PF05634.11; PF01541.24; PF07840.12	6565_0:0033f3	1268544at2759	Reverse transcriptase
TRINITY_DN14281_c0_g3_i2	sp|Q8N8U2|CDYL2_HUMAN	Q8N8U2	GO:0003714; GO:0005515; GO:0005634; GO:0003824; GO:0045892	Chromodomain Y-like protein 2 OS=Homo sapiens OX=9606 GN=CDYL2 PE=1 SV=2	PF07218.11; PF11717.8; PF15782.5; PF00385.24	6565_0:004bf7	11975at6447	A0A0L8FZX3_OCTBM
TRINITY_DN14289_c0_g1_i2	sp|Q28FY0|TILB_XENTR	Q28FY0	GO:0042995; GO:0005737; GO:0005929	Protein tilB homolog OS=Xenopus tropicalis OX=8364 GN=lrrc6 PE=2 SV=1	PF13516.6; PF14580.6; PF13855.6; PF12799.7; PF15374.6; PF09746.9	29159_0:002d15	338370at33208	protein tilB homolog
TRINITY_DN14711_c0_g1_i2	sp|A6H759|LRC72_BOVIN	A6H759		Leucine-rich repeat-containing protein 72 OS=Bos taurus OX=9913 GN=LRRC72 PE=2 SV=1	PF00560.33; PF13516.6; PF13855.6; PF12799.7; PF14580.6	29159_0:0038f1	1447031at2759	U2 small nuclear ribonucleoprotein A'
TRINITY_DN14807_c0_g4_i1	sp|P14854|CX6B1_HUMAN	P14854	GO:0005743; GO:0006119; GO:0006123; GO:0021762; GO:0004129; GO:1902600; GO:0016020; GO:0005739; GO:0045277	Cytochrome c oxidase subunit 6B1 OS=Homo sapiens OX=9606 GN=COX6B1 PE=1 SV=2	PF02297.17	37621_0:002358	1586678at2759	Cytochrome c oxidase subunit	R-HSA-5628897; R-HSA-611105	TP53 Regulates Metabolic Genes; Respiratory electron transport
TRINITY_DN14871_c0_g1_i1	sp|P80585|TBCA_CHICK	P80585	GO:0005856; GO:0005874; GO:0005737; GO:0007021; GO:0006457; GO:0015631; GO:0007023; GO:0005829; GO:0048487; GO:0015630	Tubulin-specific chaperone A OS=Gallus gallus OX=9031 GN=TBCA PE=1 SV=2	PF02970.16	1629725_0:001613	137252at33392	tubulin-specific chaperone A
TRINITY_DN14938_c0_g1_i1	sp|Q5BJD2|TERB2_DANRE	Q5BJD2	GO:0070197; GO:0007129; GO:0005637; GO:0000781; GO:0003674; GO:0045141	Telomere repeats-binding bouquet formation protein 2 OS=Danio rerio OX=7955 GN=terb2 PE=2 SV=1	PF01456.17; PF15087.6; PF15101.6	6573_0:0028ad	11567at6447	uncharacterized protein LOC105336280
TRINITY_DN14970_c0_g1_i5					PF00431.20; PF00057.18	7741_0:000e87	1343330at2759	Low-density lipoprotein (LDL) receptor class A, conserved site
TRINITY_DN14977_c0_g1_i1	sp|P0C2B7|RM52_BOVIN	P0C2B7	GO:0005762; GO:0005743; GO:0003735; GO:0032543; GO:0005739; GO:0005840; GO:0006412	39S ribosomal protein L52, mitochondrial OS=Bos taurus OX=9913 GN=MRPL52 PE=1 SV=1	PF09769.9; PF18699.1	10224_0:0003b5	1623574at2759	Mitochondrial ribosomal protein L52	R-BTA-5389840; R-BTA-5419276	Mitochondrial translation elongation; Mitochondrial translation termination
TRINITY_DN15021_c0_g1_i1	sp|A7S8T5|CCD42_NEMVE	A7S8T5		Coiled-coil domain-containing protein 42 homolog OS=Nematostella vectensis OX=45351 GN=v1g187067 PE=3 SV=1	PF13863.6; PF00787.24	225164_0:001fe9	1528754at2759	Coiled-coil domain containing 42
TRINITY_DN15021_c0_g2_i1	sp|A7S8T5|CCD42_NEMVE	A7S8T5		Coiled-coil domain-containing protein 42 homolog OS=Nematostella vectensis OX=45351 GN=v1g187067 PE=3 SV=1	PF08702.10; PF06428.11; PF10046.9; PF16046.5; PF11559.8; PF16385.5; PF08537.10; PF02601.15; PF13334.6; PF12210.8; PF13863.6; PF05837.12; PF18595.1	29159_0:000b6d	1528754at2759	Coiled-coil domain containing 42
TRINITY_DN15327_c0_g1_i1					PF05308.11	37653_0:001b47
TRINITY_DN15348_c0_g1_i1					PF13917.6; PF13717.6; PF14787.6; PF15288.6; PF14392.6; PF07092.12; PF13696.6; PF00098.23
TRINITY_DN15470_c0_g1_i7					PF17693.1	34740_0:004a1f	10185at33208	Immunoglobulin-like domain
TRINITY_DN15475_c0_g2_i3						225164_0:000e2b	1260388at2759	Reverse transcriptase
TRINITY_DN15479_c0_g1_i2	sp|Q8TGM7|ART2_YEAST	Q8TGM7	GO:0008150; GO:0005575; GO:0003674	Putative uncharacterized protein ART2 OS=Saccharomyces cerevisiae (strain ATCC 204508 / S288c) OX=559292 GN=ART2 PE=5 SV=1		7536_0:004877	144126at6960	uncharacterized protein LOC105693632
TRINITY_DN15479_c0_g2_i1	sp|Q8TGM7|ART2_YEAST	Q8TGM7	GO:0008150; GO:0005575; GO:0003674	Putative uncharacterized protein ART2 OS=Saccharomyces cerevisiae (strain ATCC 204508 / S288c) OX=559292 GN=ART2 PE=5 SV=1		35525_0:005dea	13690at6657	E9HYL5_DAPPU
TRINITY_DN15560_c0_g3_i1	sp|Q9CXZ1|NDUS4_MOUSE	Q9CXZ1	GO:0016651; GO:0070469; GO:0005743; GO:0071453; GO:0008137; GO:0045333; GO:0036343; GO:0005747; GO:0007601; GO:0022904; GO:0006099; GO:0019933; GO:0016020; GO:0048146; GO:0005739; GO:0022900	NADH dehydrogenase [ubiquinone] iron-sulfur protein 4, mitochondrial OS=Mus musculus OX=10090 GN=Ndufs4 PE=1 SV=3	PF04800.12; PF16687.5	218467_0:0007cb	120182at6656	NADH dehydrogenase	R-MMU-611105; R-MMU-6799198	Respiratory electron transport; Complex I biogenesis
TRINITY_DN15605_c0_g1_i3	sp|Q3T0Z8|RUXF_BOVIN	Q3T0Z8	GO:0005681; GO:0005687; GO:0005685; GO:0008380; GO:0071013; GO:0005737; GO:0034715; GO:0071007; GO:0003723; GO:0034719; GO:0006397; GO:0000387; GO:0000398; GO:0005634; GO:0005829; GO:0005683; GO:0034709	Small nuclear ribonucleoprotein F OS=Bos taurus OX=9913 GN=SNRPF PE=3 SV=2		6573_0:004c30	10621at6447	small nuclear ribonucleoprotein F	R-BTA-111367; R-BTA-191859; R-BTA-72163; R-BTA-72165; R-BTA-73856; R-BTA-77588	SLBP independent Processing of Histone Pre-mRNAs; snRNP Assembly; mRNA Splicing - Major Pathway; mRNA Splicing - Minor Pathway; RNA Polymerase II Transcription Termination; SLBP Dependent Processing of Replication-Dependent Histone Pre-mRNAs
TRINITY_DN15653_c0_g1_i1	sp|Q6PGB6|NAA50_MOUSE	Q6PGB6	GO:0016746; GO:0007064; GO:0043967; GO:0005737; GO:0071962; GO:0016740; GO:0006474; GO:0016573; GO:0010485; GO:0005515; GO:0052858; GO:0008080; GO:0005829; GO:0004596; GO:0005634; GO:0034087; GO:0031415	N-alpha-acetyltransferase 50 OS=Mus musculus OX=10090 GN=Naa50 PE=1 SV=1	PF13420.7; PF00583.25; PF08445.10; PF13508.7; PF13523.6; PF13527.7; PF13302.7; PF02172.16; PF13673.7	6526_0:0023b6	1536763at2759	Acyl-CoA N-acyltransferase
TRINITY_DN15705_c0_g1_i1	sp|Q9XY35|QCR9_DROME	Q9XY35	GO:0070469; GO:0006122; GO:0005743; GO:0009060; GO:0008121; GO:0005739; GO:0016021; GO:0016020; GO:0005750	Cytochrome b-c1 complex subunit 9 OS=Drosophila melanogaster OX=7227 GN=ox PE=3 SV=1		52670_0:000e50	135495at7898	cytochrome b-c1 complex subunit 9	R-DME-611105	Respiratory electron transport
TRINITY_DN15848_c0_g2_i2	sp|Q58CS6|IFT20_BOVIN	Q58CS6	GO:0005856; GO:0007283; GO:0061512; GO:0042073; GO:2000583; GO:0042995; GO:0005737; GO:0030992; GO:0030154; GO:0005813; GO:0030030; GO:0005794; GO:2000785; GO:0005929; GO:0051642; GO:1902017	Intraflagellar transport protein 20 homolog OS=Bos taurus OX=9913 GN=IFT20 PE=2 SV=1	PF08702.10; PF14931.6; PF01025.19; PF06401.11; PF14197.6; PF02734.17; PF04102.12; PF10119.9	29159_0:00139f	10228at6447	intraflagellar transport protein 20 homolog	R-BTA-5620924	Intraflagellar transport
TRINITY_DN15884_c0_g1_i4	sp|P82670|RT10_BOVIN	P82670	GO:0005763; GO:0005739; GO:0005840; GO:0005743	28S ribosomal protein S10, mitochondrial OS=Bos taurus OX=9913 GN=MRPS10 PE=1 SV=2	PF00338.22	13616_0:0018de	10837at9263	Mitochondrial ribosomal protein S10	R-BTA-5389840; R-BTA-5419276	Mitochondrial translation elongation; Mitochondrial translation termination
TRINITY_DN15908_c0_g1_i1	sp|Q6B857|CFA20_BOVIN	Q6B857	GO:0036064; GO:0005856; GO:0005874; GO:2000253; GO:0060271; GO:0005654; GO:0005814; GO:0018095; GO:0031514; GO:0005634; GO:0005929; GO:0060296; GO:2000147	Cilia- and flagella-associated protein 20 OS=Bos taurus OX=9913 GN=CFAP20 PE=2 SV=1	PF05018.13	29159_0:0020e2	1213295at2759	cilia- and flagella-associated protein 20
TRINITY_DN16_c2_g2_i2					PF02743.18; PF00010.26; PF02016.15; PF11796.8; PF18263.1	6573_0:0007a2	11554at6447	uncharacterized protein LOC111108643
TRINITY_DN160_c1_g3_i1	sp|Q17Q97|REX1B_BOVIN	Q17Q97		Required for excision 1-B domain-containing protein OS=Bos taurus OX=9913 GN=REX1BD PE=2 SV=1	PF16533.5; PF13874.6; PF13476.6; PF14966.6; PF16515.5; PF01601.16; PF06009.12; PF09440.10; PF05549.11; PF07464.11; PF01484.17	37653_0:000fbe	11123at6447	uncharacterized protein C19orf60 homolog
TRINITY_DN16084_c0_g1_i6	sp|Q56JZ7|ZCRB1_BOVIN	Q56JZ7	GO:0008270; GO:0005681; GO:0008380; GO:0003676; GO:0005654; GO:0003723; GO:0005689; GO:0006397; GO:0046872; GO:0005634; GO:0000398	Zinc finger CCHC-type and RNA-binding motif-containing protein 1 OS=Bos taurus OX=9913 GN=ZCRB1 PE=2 SV=1	PF05236.14; PF13917.6; PF00098.23	6573_0:00152f	1422822at2759	zinc finger CCHC-type and RNA-binding motif-containing protein 1	R-BTA-72165	mRNA Splicing - Minor Pathway
TRINITY_DN16111_c0_g1_i1					PF04995.14
TRINITY_DN163_c0_g1_i11					PF13634.6; PF08412.10; PF14789.6
TRINITY_DN1646_c0_g1_i9	sp|Q9HDD0|PLAT1_HUMAN	Q9HDD0	GO:0070292; GO:0004623; GO:0016787; GO:0005737; GO:0016740; GO:0008970; GO:0006629; GO:0016021; GO:0016042; GO:0005634; GO:0016410; GO:0016020; GO:0102567	Phospholipase A and acyltransferase 1 OS=Homo sapiens OX=9606 GN=PLAAT1 PE=1 SV=1	PF04970.13; PF00877.19	6573_0:001c1d	10353at6447	HRAS-like suppressor 2	R-HSA-1482839	Acyl chain remodelling of PE
TRINITY_DN16571_c0_g1_i4	sp|Q921Y2|IMP3_MOUSE	Q921Y2	GO:0006364; GO:0042254; GO:0005654; GO:0003723; GO:0032040; GO:0034457; GO:0030684; GO:0005634; GO:0030515; GO:0019843; GO:0005730	U3 small nucleolar ribonucleoprotein protein IMP3 OS=Mus musculus OX=10090 GN=Imp3 PE=2 SV=1	PF01479.25; PF00178.22; PF04420.14; PF00163.19	7574_0:002cec	1336285at2759	RNA-binding S4 domain	R-MMU-6791226	Major pathway of rRNA processing in the nucleolus and cytosol
TRINITY_DN1659_c0_g1_i1	sp|P63171|DYLT1_BOVIN	P63171	GO:0008277; GO:0005856; GO:0005874; GO:0005819; GO:0005737; GO:0006886; GO:0050768; GO:0030286; GO:0000132; GO:0005515; GO:0051301; GO:0005794; GO:0007399; GO:0043001; GO:0005868; GO:0007049	Dynein light chain Tctex-type 1 OS=Bos taurus OX=9913 GN=DYNLT1 PE=1 SV=1	PF17770.1; PF17022.5; PF03645.13	10224_0:00023f	1474572at2759	Dynein light chain Tctex-type 1	R-BTA-6798695	Neutrophil degranulation
TRINITY_DN16595_c0_g1_i3					PF04102.12; PF05524.13; PF02185.16
TRINITY_DN16763_c0_g1_i5					PF14176.6; PF18847.1	50429_0:005db3	10781at6101	uncharacterized protein LOC110057560
TRINITY_DN16824_c0_g1_i6					PF13613.6	10224_0:000be1	1240248at2759	THAP-type zinc finger
TRINITY_DN17_c0_g5_i1	sp|Q3B7G7|SR1IP_DANRE	Q3B7G7	GO:0008270; GO:0008380; GO:0003676; GO:0005575; GO:0006397; GO:0046872	Protein SREK1IP1 OS=Danio rerio OX=7955 GN=srek1ip1 PE=2 SV=1	PF04086.13; PF13917.6	6565_0:002fde	11863at6447	protein SREK1IP1-like
TRINITY_DN17175_c0_g2_i1					PF00531.22	37653_0:002ffb	11661at6447	uncharacterized protein LOC106879591
TRINITY_DN17199_c0_g1_i1	sp|P48149|RS15A_DROME	P48149	GO:0003735; GO:0022627; GO:0022626; GO:0002181; GO:0005840; GO:0006412	40S ribosomal protein S15Aa OS=Drosophila melanogaster OX=7227 GN=RpS15Aa PE=1 SV=2	PF00410.19	136037_0:001a6a	131484at50557	40S ribosomal protein S15Aa	R-DME-156827; R-DME-1799339; R-DME-6791226; R-DME-72649; R-DME-72689; R-DME-72695; R-DME-72702; R-DME-72706; R-DME-975956; R-DME-975957	L13a-mediated translational silencing of Ceruloplasmin expression; SRP-dependent cotranslational protein targeting to membrane; Major pathway of rRNA processing in the nucleolus and cytosol; Translation initiation complex formation; Formation of a pool of free 40S subunits; Formation of the ternary complex, and subsequently, the 43S complex; Ribosomal scanning and start codon recognition; GTP hyd…
TRINITY_DN17254_c0_g2_i1	sp|Q6RYS3|RL8_MAMBR	Q6RYS3	GO:0003735; GO:0005737; GO:0019843; GO:0003723; GO:0005840; GO:0006412	60S ribosomal protein L8 OS=Mamestra brassicae OX=55057 GN=RpL8 PE=2 SV=1		37653_0:001683	1156335at2759	Ribosomal protein L2
TRINITY_DN17330_c0_g1_i1					PF17917.1; PF00075.24; PF17919.1; PF03368.14	6500_0:000dc7	1031088at2759	reverse transcriptase ribonuclease h
TRINITY_DN17416_c0_g2_i1						133434_0:0021e4
TRINITY_DN17445_c0_g1_i1	sp|B6CZ45|LRC51_MACMU	B6CZ45	GO:0005737	Leucine-rich repeat-containing protein 51 OS=Macaca mulatta OX=9544 GN=LRTOMT PE=2 SV=1	PF00560.33; PF13516.6; PF13855.6; PF14580.6; PF12799.7	29159_0:001282	10778at6447	leucine-rich repeat-containing protein 51-like
TRINITY_DN17518_c0_g1_i4						6573_0:001553
TRINITY_DN17631_c0_g1_i2					PF13130.6
TRINITY_DN17670_c0_g1_i2	sp|Q2TBR7|CENPS_BOVIN	Q2TBR7	GO:0005694; GO:0003677; GO:0007049; GO:0043240; GO:0071821; GO:0006281; GO:0000712; GO:0031297; GO:0006974; GO:0051301; GO:0003690; GO:0003682; GO:0000775; GO:0000776; GO:0046982; GO:0051382	Centromere protein S OS=Bos taurus OX=9913 GN=CENPS PE=2 SV=1	PF15511.6; PF00125.24; PF17931.1; PF15630.6	6565_0:002a87	11768at6447	Centromere protein S	R-BTA-141444; R-BTA-2467813; R-BTA-2500257; R-BTA-5663220; R-BTA-606279; R-BTA-6783310; R-BTA-68877	Amplification of signal from unattached kinetochores via a MAD2 inhibitory signal; Separation of Sister Chromatids; Resolution of Sister Chromatid Cohesion; RHO GTPases Activate Formins; Deposition of new CENPA-containing nucleosomes at the centromere; Fanconi Anemia Pathway; Mitotic Prometaphase
TRINITY_DN17808_c0_g2_i2	sp|Q3LRP1|TNR5_CALJA	Q3LRP1	GO:0043536; GO:0051607; GO:0016021; GO:0016020; GO:0038023; GO:0071260; GO:0043547; GO:0001934; GO:0019899; GO:2000353; GO:0023035; GO:0043231; GO:0051092; GO:0031625; GO:0045766; GO:0002376; GO:0045944; GO:0050776; GO:0043491; GO:0042531; GO:0006874; GO:0043406; GO:0090037; GO:0043123	Tumor necrosis factor receptor superfamily member 5 OS=Callithrix jacchus OX=9483 GN=CD40 PE=2 SV=1	PF08693.10; PF00531.22; PF00020.18; PF04478.12; PF05454.11	6573_0:003397	21519at6447	tumor necrosis factor receptor superfamily member 21-like isoform X1
TRINITY_DN17813_c0_g4_i2						225164_0:001706
TRINITY_DN17814_c0_g1_i3	sp|Q5NC57|F183B_MOUSE	Q5NC57	GO:0036064; GO:0005856; GO:0008150; GO:0097546; GO:0042995; GO:0005737; GO:0005813; GO:0005515	Protein FAM183B OS=Mus musculus OX=10090 GN=Fam183b PE=1 SV=2	PF14886.6	29159_0:0015a6	1544712at2759	protein FAM183A
TRINITY_DN17814_c0_g2_i1	sp|A6NL82|F183A_HUMAN	A6NL82	GO:0097546	Protein FAM183A OS=Homo sapiens OX=9606 GN=FAM183A PE=3 SV=2	PF14886.6; PF14945.6	6573_0:000539	1544712at2759	protein FAM183A
TRINITY_DN17920_c0_g1_i2					PF05225.16; PF03221.16	6565_0:004718	10382at6447	HTH CenpB-type DNA-binding domain
TRINITY_DN17963_c0_g1_i1					PF01846.19
TRINITY_DN18022_c1_g1_i1					PF03207.13	29159_0:004b3a	14709at6447	uncharacterized protein LOC109621032
TRINITY_DN1803_c0_g2_i1	sp|E2RKA8|RL32_CANLF	E2RKA8	GO:0003735; GO:0005840; GO:0022625; GO:0006412	60S ribosomal protein L32 OS=Canis lupus familiaris OX=9615 GN=RPL32 PE=1 SV=1	PF01655.18	29159_0:002e7f	1460684at2759	Ribosomal protein L32e	R-CFA-156827; R-CFA-1799339; R-CFA-6791226; R-CFA-72689; R-CFA-72706; R-CFA-975956; R-CFA-975957	L13a-mediated translational silencing of Ceruloplasmin expression; SRP-dependent cotranslational protein targeting to membrane; Major pathway of rRNA processing in the nucleolus and cytosol; Formation of a pool of free 40S subunits; GTP hydrolysis and joining of the 60S ribosomal subunit; Nonsense Mediated Decay (NMD) independent of the Exon Junction Complex (EJC); Nonsense Mediated Decay (NMD) e…
TRINITY_DN1804_c2_g2_i1	sp|Q9Y6J8|STYL1_HUMAN	Q9Y6J8	GO:0006470; GO:0008138; GO:0005739; GO:0062030; GO:0001691; GO:0005759; GO:0032515; GO:0010976; GO:0005515; GO:2001242; GO:2001244; GO:0035556; GO:0004864; GO:0019903	Serine/threonine/tyrosine-interacting-like protein 1 OS=Homo sapiens OX=9606 GN=STYXL1 PE=1 SV=1	PF03162.13; PF14671.6; PF00782.20; PF00581.20; PF00102.27	29159_0:0021c5	451243at33208	serine/threonine/tyrosine-interacting-like protein 1
TRINITY_DN1806_c0_g3_i2	sp|A6QLH5|ERI3_BOVIN	A6QLH5	GO:0000738; GO:0000467; GO:0016787; GO:0003676; GO:0000175; GO:0004527; GO:0046872; GO:0004518	ERI1 exoribonuclease 3 OS=Bos taurus OX=9913 GN=ERI3 PE=2 SV=1	PF00929.24	7741_0:003223	469152at33208	ERI1 exoribonuclease 2
TRINITY_DN18073_c0_g2_i6	sp|Q6IR42|ZCPW1_MOUSE	Q6IR42	GO:0008270; GO:0035064; GO:0045911; GO:0007283; GO:0007129; GO:0007127; GO:0030154; GO:0001741; GO:0046872; GO:0005634; GO:2000781	Zinc finger CW-type PWWP domain protein 1 OS=Mus musculus OX=10090 GN=Zcwpw1 PE=1 SV=2	PF00855.17; PF07496.15	29159_0:004018	10074at1206795	uncharacterized protein LOC110462974
TRINITY_DN18140_c0_g2_i1					PF14523.6; PF04136.15; PF06156.13; PF11559.8	10224_0:004b63	1399070at2759	coiled-coil domain-containing protein 172
TRINITY_DN18156_c0_g1_i1					PF16100.5	6573_0:005ac4	1604165at2759	recQ-mediated genome instability protein 2
TRINITY_DN18211_c0_g1_i2	sp|O75964|ATP5L_HUMAN	O75964	GO:0042776; GO:0005743; GO:0015078; GO:0000276; GO:0042407; GO:0045263; GO:0015986; GO:0006754; GO:0005515; GO:0016020; GO:0006811; GO:0005739	ATP synthase subunit g, mitochondrial OS=Homo sapiens OX=9606 GN=ATP5MG PE=1 SV=3	PF04718.15	116153_0:0017cf	132830at33392	ATP synthase subunit g, mitochondrial	R-HSA-163210; R-HSA-8949613	Formation of ATP by chemiosmotic coupling; Cristae formation
TRINITY_DN1829_c0_g1_i1	sp|Q32L31|HMGB3_BOVIN	Q32L31	GO:0005694; GO:0003677; GO:0045087; GO:0032392; GO:0005737; GO:0008301; GO:0000400; GO:0002376; GO:0005634; GO:0003690; GO:0006357; GO:0006310	High mobility group protein B3 OS=Bos taurus OX=9913 GN=HMGB3 PE=2 SV=2	PF00505.19; PF11169.8; PF14887.6; PF09011.10	6565_0:0062c3	10108at6447	High mobility group box domain
TRINITY_DN1838_c0_g4_i1	sp|Q9DCM0|ETHE1_MOUSE	Q9DCM0	GO:0005654; GO:0005737; GO:0005759; GO:0050313; GO:0070813; GO:0051213; GO:0016491; GO:0005506; GO:0046872; GO:0005634; GO:0005739; GO:0016788; GO:0006749	Persulfide dioxygenase ETHE1, mitochondrial OS=Mus musculus OX=10090 GN=Ethe1 PE=1 SV=2	PF00753.27	29159_0:001775	1203911at2759	metallo-beta-lactamase domain-containing protein 2	R-MMU-1614517	Sulfide oxidation to sulfate
TRINITY_DN184_c1_g3_i1	sp|Q9JM93|AR6P4_MOUSE	Q9JM93	GO:0008380; GO:0006397; GO:0005515; GO:0005634; GO:0016607; GO:0005730	ADP-ribosylation factor-like protein 6-interacting protein 4 OS=Mus musculus OX=10090 GN=Arl6ip4 PE=1 SV=1	PF10500.9; PF09726.9	6565_0:003e52	11337at6447	ADP-ribosylation factor-like protein 6-interacting protein 4
TRINITY_DN18457_c0_g1_i3	sp|Q2KIU7|RSPH9_BOVIN	Q2KIU7	GO:1904158; GO:0060091; GO:0003341; GO:0005856; GO:0042995; GO:0005737; GO:0035082; GO:0031514; GO:0044458; GO:0005930; GO:0030030; GO:0005929; GO:0062177; GO:0060271; GO:0060294; GO:0001534; GO:0097729	Radial spoke head protein 9 homolog OS=Bos taurus OX=9913 GN=RSPH9 PE=2 SV=1	PF04712.12	6573_0:002e26	406052at33208	radial spoke head protein 9 homolog
TRINITY_DN1848_c0_g1_i4	sp|Q6P582|MZT2A_HUMAN	Q6P582	GO:0005856; GO:0008274; GO:0005654; GO:0005815; GO:0005737; GO:0005813; GO:0005515; GO:0005829; GO:0005819	Mitotic-spindle organizing protein 2A OS=Homo sapiens OX=9606 GN=MZT2A PE=1 SV=2	PF12926.7	6573_0:00452e	11810at6447	mitotic-spindle organizing protein 2B-like	R-HSA-380270; R-HSA-380320	Recruitment of mitotic centrosome proteins and complexes; Recruitment of NuMA to mitotic centrosomes
TRINITY_DN1855_c0_g5_i2	sp|Q4I963|COFI_GIBZE	Q4I963	GO:0003779; GO:0005856; GO:0005737; GO:0015629; GO:0051301; GO:0030042; GO:0005634; GO:0016363; GO:0007049	Cofilin OS=Gibberella zeae (strain PH-1 / ATCC MYA-4620 / FGSC 9075 / NRRL 31084) OX=229533 GN=COF1 PE=3 SV=2	PF00241.20	225164_0:003cce	10806at6447	actophorin-like
TRINITY_DN1859_c2_g1_i3	sp|P23935|NDUA5_BOVIN	P23935	GO:0070469; GO:0032981; GO:0005743; GO:0008137; GO:0005739; GO:0005747; GO:0022904; GO:0016020	NADH dehydrogenase [ubiquinone] 1 alpha subcomplex subunit 5 OS=Bos taurus OX=9913 GN=NDUFA5 PE=1 SV=3	PF04716.14	108931_0:002ee6	1372253at2759	NADH dehydrogenase	R-BTA-611105; R-BTA-6799198	Respiratory electron transport; Complex I biogenesis
TRINITY_DN18692_c0_g1_i4						67767_0:004360	115387at33392	Transposable element tc3 transposase
TRINITY_DN18918_c0_g1_i1	sp|A2AWP0|BIRC7_MOUSE	A2AWP0	GO:0061630; GO:0010466; GO:0043027; GO:0051726; GO:0030414; GO:0004869; GO:0004842; GO:0005737; GO:0016567; GO:0006915; GO:0016740; GO:0005794; GO:0005634; GO:0031398; GO:0042127; GO:0070247; GO:0046872; GO:0043066	Baculoviral IAP repeat-containing protein 7 OS=Mus musculus OX=10090 GN=Birc7 PE=2 SV=1	PF00653.21	6565_0:0059c8	1063438at2759	probable BOI-related E3 ubiquitin-protein ligase 2
TRINITY_DN19081_c0_g1_i4						225164_0:000e2b	1260388at2759	Reverse transcriptase
TRINITY_DN1918_c0_g1_i1	sp|Q8NHS9|SPT22_HUMAN	Q8NHS9	GO:0051445; GO:0005694; GO:0000711; GO:0007129; GO:0051321; GO:0007276; GO:0005515	Spermatogenesis-associated protein 22 OS=Homo sapiens OX=9606 GN=SPATA22 PE=1 SV=2	PF00050.21	6573_0:003413	11455at6447	uncharacterized protein LOC111110369
TRINITY_DN1923_c1_g1_i1	sp|A8Y5T1|CA194_DANRE	A8Y5T1	GO:0005737; GO:0005856	Uncharacterized protein C1orf194 homolog OS=Danio rerio OX=7955 GN=si:ch211-163l21.7 PE=4 SV=1	PF12494.8	6565_0:0064fe	1429280at2759	uncharacterized protein C1orf194 homolog
TRINITY_DN19258_c0_g3_i1	sp|P22534|GUNA_CALSA	P22534	GO:0016787; GO:0000272; GO:0008810; GO:0030248; GO:0030245; GO:0016798; GO:0008152; GO:0004553; GO:0030246; GO:0005975	Endoglucanase A OS=Caldicellulosiruptor saccharolyticus OX=44001 GN=celA PE=3 SV=2		10224_0:00124f	1195424at2759	Endoglucanase
TRINITY_DN19354_c0_g1_i2	sp|Q5TJE6|PFD6_CANLF	Q5TJE6	GO:0005737; GO:0006457; GO:0051082; GO:0051087; GO:0051131; GO:0016272	Prefoldin subunit 6 OS=Canis lupus familiaris OX=9615 GN=PFDN6 PE=3 SV=1	PF08702.10; PF07321.12; PF17060.5; PF14523.6; PF11365.8; PF17623.2; PF04380.13; PF13851.6; PF08919.10; PF12732.7; PF15005.6; PF07889.12; PF18052.1; PF04417.12; PF01920.20; PF02996.17	29159_0:0020b1	10595at1206795	prefoldin subunit 6
TRINITY_DN19370_c0_g1_i3	sp|A2ARZ3|FSIP2_MOUSE	A2ARZ3	GO:0097224; GO:0097228; GO:0097229; GO:0007288; GO:0031514; GO:0005515; GO:0030317; GO:0061512; GO:0005739; GO:0097225	Fibrous sheath-interacting protein 2 OS=Mus musculus OX=10090 GN=Fsip2 PE=1 SV=3	PF02758.16; PF00393.19; PF04316.13; PF00204.25	6573_0:00383b	1235606at2759	fibrous sheath-interacting protein 2
TRINITY_DN19413_c0_g1_i1					PF05643.11; PF17593.2	6573_0:001748	1128973at2759	probable 28S rRNA (cytosine-C(5))-methyltransferase
TRINITY_DN19425_c0_g2_i2						6565_0:0017e4	15460at6447	uncharacterized protein LOC111118861
TRINITY_DN19447_c0_g1_i1	sp|A6X8Z9|TEX55_MOUSE	A6X8Z9	GO:0008150; GO:0005634; GO:0003674	Testis-specific expressed protein 55 OS=Mus musculus OX=10090 GN=Tex55 PE=2 SV=1	PF07434.11; PF17819.1; PF15745.5	6565_0:002d78	12372at1206795	uncharacterized protein LOC111130044
TRINITY_DN19474_c0_g2_i1	sp|Q6QLW4|CYC_PECGU	Q6QLW4	GO:0070469; GO:0005758; GO:0009055; GO:0046872; GO:0005739; GO:0020037; GO:0022900	Cytochrome c OS=Pectinaria gouldii OX=260746 PE=3 SV=1	PF13442.6; PF14495.6; PF16694.5; PF00034.21	6500_0:001c62	10075at1206795	cytochrome c-like
TRINITY_DN19597_c0_g1_i1					PF03770.16; PF18249.1
TRINITY_DN19647_c0_g1_i1					PF17064.5	7574_0:00296c	1540622at2759	Dxr_0 protein
TRINITY_DN19733_c0_g1_i1	sp|A7RX26|HUTI_NEMVE	A7RX26	GO:0016787; GO:0006547; GO:0016810; GO:0005737; GO:0019557; GO:0016812; GO:0006548; GO:0019556; GO:0046872; GO:0050480	Probable imidazolonepropionase OS=Nematostella vectensis OX=45351 GN=amdhd1 PE=3 SV=1	PF07969.11	6565_0:007032	343273at33208	probable imidazolonepropionase
TRINITY_DN1979_c0_g1_i4	sp|Q0IIF6|FAIM1_BOVIN	Q0IIF6	GO:1902042; GO:0005737; GO:0006915; GO:0050769; GO:0007249; GO:0043066	Fas apoptotic inhibitory molecule 1 OS=Bos taurus OX=9913 GN=FAIM PE=2 SV=1	PF06905.13	6500_0:002fa4	1301275at2759	fas apoptotic inhibitory molecule 1
TRINITY_DN19801_c0_g5_i1	sp|Q9NUV9|GIMA4_HUMAN	Q9NUV9	GO:0005737; GO:0000166; GO:0005829; GO:0005525	GTPase IMAP family member 4 OS=Homo sapiens OX=9606 GN=GIMAP4 PE=1 SV=1	PF04548.16; PF03193.16; PF04281.13; PF00910.22; PF01926.23; PF01935.17; PF00350.23; PF02421.18; PF13555.6; PF10662.9	80966_0:0057b3	1270445at2759	GTPase IMAP family member 4-like
TRINITY_DN1982_c0_g1_i1					PF01771.17; PF09588.10	6565_0:0067cf	1023757at2759	Restriction endonuclease type II-like
TRINITY_DN1982_c0_g3_i4					PF13613.6; PF15005.6; PF13586.6; PF13359.6; PF01609.21	6565_0:002494	1318796at2759	THAP-type zinc finger
TRINITY_DN1986_c0_g3_i1					PF12143.8; PF07782.13
TRINITY_DN1988_c0_g1_i2	sp|Q8TC29|ENKUR_HUMAN	Q8TC29	GO:0097728; GO:0097228; GO:0017124; GO:0042995; GO:0031514; GO:0005515; GO:0001669; GO:0030317; GO:0005929; GO:0005516; GO:0061966; GO:0097729	Enkurin OS=Homo sapiens OX=9606 GN=ENKUR PE=2 SV=1	PF00448.22; PF08647.11; PF13864.6	6565_0:007a0e	1449984at2759	enkurin
TRINITY_DN1989_c0_g1_i5	sp|Q9U6D3|CALM_MYXGL	Q9U6D3	GO:0005509; GO:0046872	Calmodulin OS=Myxine glutinosa OX=7769 PE=2 SV=3		10181_0:002b00	1386217at2759	calmodulin
TRINITY_DN20081_c0_g2_i1	sp|Q9VZD5|RT06_DROME	Q9VZD5	GO:0003735; GO:0005763; GO:0019843; GO:0032543; GO:0070181; GO:0005739; GO:0005840; GO:0006412	Probable 28S ribosomal protein S6, mitochondrial OS=Drosophila melanogaster OX=7227 GN=mRpS6 PE=2 SV=1	PF01787.16; PF01250.17	37653_0:000ec6	10954at6447	uncharacterized protein LOC101864331	R-DME-5389840; R-DME-5419276	Mitochondrial translation elongation; Mitochondrial translation termination
TRINITY_DN2009_c0_g1_i2					PF17410.2
TRINITY_DN20380_c0_g1_i2						6565_0:004b0d	1416962at2759	deleted in malignant brain tumors 1 protein-like
TRINITY_DN2044_c0_g1_i1	sp|Q7SZ22|SUMO3_XENLA	Q7SZ22	GO:0005737; GO:0005634; GO:0016605	Small ubiquitin-related modifier 3 OS=Xenopus laevis OX=8355 GN=sumo3 PE=3 SV=1		6565_0:0027a7	10550at6447	Small ubiquitin-related modifier
TRINITY_DN20583_c0_g1_i10	sp|Q8WZ64|ARAP2_HUMAN	Q8WZ64	GO:0005096; GO:0005547; GO:0043547; GO:0007165; GO:0005737; GO:0051056; GO:0046872; GO:0005829	Arf-GAP with Rho-GAP domain, ANK repeat and PH domain-containing protein 2 OS=Homo sapiens OX=9606 GN=ARAP2 PE=1 SV=3	PF01412.18; PF00169.29; PF15413.6; PF15409.6	6573_0:005809	1879at6447	LOW QUALITY PROTEIN: arf-GAP with Rho-GAP domain, ANK repeat and PH domain-containing protein 1-like	R-HSA-194840	Rho GTPase cycle
TRINITY_DN20661_c0_g1_i7	sp|Q3UDW8|HGNAT_MOUSE	Q3UDW8	GO:0015019; GO:0016746; GO:0005765; GO:0007041; GO:0016740; GO:0005764; GO:0016021; GO:0051259; GO:0016020	Heparan-alpha-glucosaminide N-acetyltransferase OS=Mus musculus OX=10090 GN=Hgsnat PE=1 SV=2	PF16401.5; PF06524.12	6565_0:001568	1028480at2759	Heparan-alpha-glucosaminide N-acetyltransferase	R-MMU-2024096; R-MMU-6798695	HS-GAG degradation; Neutrophil degranulation
TRINITY_DN2069_c1_g1_i3	sp|P42166|LAP2A_HUMAN	P42166	GO:0005694; GO:0003677; GO:0006355; GO:0000785; GO:0005521; GO:0005515; GO:0005634; GO:0045296; GO:0005635	Lamina-associated polypeptide 2, isoform alpha OS=Homo sapiens OX=9606 GN=TMPO PE=1 SV=2		7918_0:00200d	128812at7898	lamina-associated polypeptide 2-like
TRINITY_DN2077_c0_g1_i2	sp|B9A8D7|SPI2_CRAVI	B9A8D7	GO:0004867; GO:0010951; GO:0010466; GO:0030414; GO:0005576	Serine protease inhibitor Cvsi-2 OS=Crassostrea virginica OX=6565 GN=CVSI2 PE=1 SV=1	PF02977.15; PF01683.18	29159_0:0002ab	1815242at2759	uncharacterized protein LOC111101782
TRINITY_DN20864_c0_g1_i4	sp|P55866|CASP3_XENLA	P55866	GO:0008234; GO:0016787; GO:0006508; GO:0005737; GO:0006915; GO:0004197; GO:0008233	Caspase-3 OS=Xenopus laevis OX=8355 GN=casp3 PE=2 SV=1	PF00656.22	6573_0:0035e1	417543at33208	caspase-3
TRINITY_DN20987_c0_g1_i2	sp|Q9CQN7|RM41_MOUSE	Q9CQN7	GO:1990904; GO:0005762; GO:0003735; GO:0006915; GO:0005739; GO:0005840; GO:0006412; GO:0007049	39S ribosomal protein L41, mitochondrial OS=Mus musculus OX=10090 GN=Mrpl41 PE=1 SV=1	PF09809.9	29159_0:005672	11753at6447	uncharacterized protein LOC111126464	R-MMU-5389840; R-MMU-5419276	Mitochondrial translation elongation; Mitochondrial translation termination
TRINITY_DN20998_c0_g1_i5					PF00043.25; PF18649.1	7574_0:00479f	1100590at2759	uncharacterized protein LOC105444037
TRINITY_DN21002_c0_g2_i2	sp|Q712K3|UB2R2_HUMAN	Q712K3	GO:0006511; GO:0000166; GO:0006513; GO:0005524; GO:0004842; GO:0016567; GO:0016740; GO:0070936; GO:0005515; GO:0005829; GO:0000209; GO:0061631	Ubiquitin-conjugating enzyme E2 R2 OS=Homo sapiens OX=9606 GN=UBE2R2 PE=1 SV=1	PF04592.14	29159_0:002d3e	1116856at2759	ubiquitin-conjugating enzyme E2 R2	R-HSA-8866652; R-HSA-983168	Synthesis of active ubiquitin: roles of E1 and E2 enzymes; Antigen processing: Ubiquitination & Proteasome degradation
TRINITY_DN21110_c0_g1_i1					PF00628.29; PF09588.10; PF13831.6	50429_0:0058ee	1023757at2759	Restriction endonuclease type II-like
TRINITY_DN21208_c0_g1_i4	sp|Q9DC71|RT15_MOUSE	Q9DC71	GO:0003735; GO:0005763; GO:0005654; GO:0005730; GO:0032543; GO:0005515; GO:0005761; GO:0005739; GO:0005840; GO:0006412	28S ribosomal protein S15, mitochondrial OS=Mus musculus OX=10090 GN=Mrps15 PE=1 SV=2	PF00312.22	6526_0:00112c	11628at6447	uncharacterized protein LOC110460356	R-MMU-5389840; R-MMU-5419276	Mitochondrial translation elongation; Mitochondrial translation termination
TRINITY_DN21287_c0_g4_i1					PF04111.12
TRINITY_DN21315_c0_g2_i1	sp|O00193|SMAP_HUMAN	O00193	GO:0008150; GO:0005575; GO:0003674	Small acidic protein OS=Homo sapiens OX=9606 GN=SMAP PE=1 SV=1	PF05478.11	29159_0:005607	11713at6447	small acidic protein-like
TRINITY_DN2133_c0_g2_i1	sp|Q6GP81|TM258_XENLA	Q6GP81	GO:0034998; GO:0005783; GO:0006487; GO:0016021; GO:0016020; GO:0006486	Transmembrane protein 258 OS=Xenopus laevis OX=8355 GN=tmem258 PE=3 SV=1		6573_0:001b2d	11882at1206795	transmembrane protein 258
TRINITY_DN21334_c1_g2_i1	sp|Q5JS54|PSMG4_HUMAN	Q5JS54	GO:0043248; GO:0032991; GO:0044877	Proteasome assembly chaperone 4 OS=Homo sapiens OX=9606 GN=PSMG4 PE=1 SV=2	PF04682.12; PF16093.5	29159_0:002b90	11340at6447	proteasome assembly chaperone 4-like
TRINITY_DN215_c0_g2_i5					PF10811.8; PF17235.2	29159_0:002d40	1310184at2759	Predicted protein
TRINITY_DN2161_c0_g1_i3	sp|Q567Z6|CRIPT_DANRE	Q567Z6	GO:0008017; GO:0031122; GO:0005737; GO:0030165; GO:0030425	Cysteine-rich PDZ-binding protein OS=Danio rerio OX=7955 GN=cript PE=3 SV=1		6500_0:0029d0	10194at1206795	cysteine-rich PDZ-binding protein-like
TRINITY_DN2161_c0_g2_i2	sp|Q567Z6|CRIPT_DANRE	Q567Z6	GO:0008017; GO:0031122; GO:0005737; GO:0030165; GO:0030425	Cysteine-rich PDZ-binding protein OS=Danio rerio OX=7955 GN=cript PE=3 SV=1	PF10764.9; PF06827.14; PF10235.9; PF10217.9; PF08271.12	29159_0:0067fe	10194at1206795	cysteine-rich PDZ-binding protein-like
TRINITY_DN2164_c0_g1_i9	sp|Q54PX0|Y4251_DICDI	Q54PX0	GO:0000166; GO:0106310; GO:0005524; GO:0004672; GO:0004674; GO:0006468; GO:0016740; GO:0106311; GO:0016310; GO:0005575; GO:0046872; GO:0016301	Probable serine/threonine-protein kinase DDB_G0284251 OS=Dictyostelium discoideum OX=44689 GN=DDB_G0284251 PE=3 SV=1	PF17667.1; PF07714.17; PF09631.10; PF00069.25	1049336_0:003968	13789at50557	Mitogen-activated protein kinase kinase kinase
TRINITY_DN21911_c0_g5_i1						42254_0:001fe3	112234at314145	cytochrome b-c1 complex subunit 8
TRINITY_DN2216_c0_g1_i1					PF14478.6	225164_0:005bf1	1233171at2759	gastric intrinsic factor
TRINITY_DN2231_c0_g1_i9	sp|P36425|SP17_RABIT	P36425	GO:0016020; GO:0007339; GO:0008201	Sperm surface protein Sp17 OS=Oryctolagus cuniculus OX=9986 GN=SPA17 PE=1 SV=2	PF16760.5; PF00612.27; PF01153.19; PF17897.1; PF02197.17	6573_0:004455	1333223at2759	abnormal spindle-like microcephaly-associated protein homolog isoform X1
TRINITY_DN22336_c0_g1_i1	sp|Q86QN6|BDEF_BRABE	Q86QN6	GO:0031640; GO:0050832; GO:0042742; GO:0005576; GO:0050829; GO:0006952; GO:0050830; GO:0003674	Big defensin OS=Branchiostoma belcheri OX=7741 PE=3 SV=1	PF05656.14	6565_0:00107f	1632221at2759	Gallinacin-13
TRINITY_DN22454_c0_g1_i6	sp|O14095|PLP1_SCHPO	O14095	GO:0009968; GO:0005737; GO:0006457; GO:0005634; GO:0019236; GO:0003674; GO:0005829	Thioredoxin domain-containing protein plp1 OS=Schizosaccharomyces pombe (strain 972 / ATCC 24843) OX=284812 GN=plp1 PE=1 SV=2	PF00085.20	6573_0:000365	1444223at2759	thioredoxin domain-containing protein 9
TRINITY_DN2249_c0_g1_i13	sp|D4A7U2|CARTF_RAT	D4A7U2	GO:0003677; GO:0000978; GO:0061400; GO:0001228; GO:0051090; GO:0071277; GO:0000981; GO:0005634; GO:0045944; GO:0001652; GO:0006357; GO:0035865; GO:0003700	Calcium-responsive transcription factor OS=Rattus norvegicus OX=10116 GN=Carf PE=1 SV=1	PF09875.9	6565_0:00639e	1307377at2759	protein FAR1-RELATED SEQUENCE 5-like
TRINITY_DN2258_c0_g1_i2	sp|Q32L77|CI135_BOVIN	Q32L77	GO:0016020; GO:0005737; GO:0005886; GO:0016021	Protein C9orf135 homolog OS=Bos taurus OX=9913 PE=2 SV=1	PF15139.6	6573_0:00139b	1568741at2759	uncharacterized protein C9orf135 homolog
TRINITY_DN22593_c0_g1_i2	sp|Q9VE04|RM55_DROME	Q9VE04	GO:0005762; GO:0003735; GO:0007275; GO:0032543; GO:0005739; GO:0005840; GO:0006412	39S ribosomal protein L55, mitochondrial OS=Drosophila melanogaster OX=7227 GN=mRpL55 PE=1 SV=1	PF09776.9	6945_0:003067	1553019at2759	39S ribosomal protein L55, mitochondrial	R-DME-5389840; R-DME-5419276	Mitochondrial translation elongation; Mitochondrial translation termination
TRINITY_DN2268_c1_g1_i1	sp|P67827|KC1A_BOVIN	P67827	GO:0016607; GO:0045095; GO:0036064; GO:0106310; GO:0005524; GO:0004672; GO:0004674; GO:0005737; GO:0090090; GO:0005847; GO:0006468; GO:0106311; GO:0016740; GO:0042995; GO:0051301; GO:0005634; GO:0018105; GO:0045104; GO:0000777; GO:0000776; GO:0016301	Casein kinase I isoform alpha OS=Bos taurus OX=9913 GN=CSNK1A1 PE=1 SV=1	PF17667.1; PF07714.17; PF01636.23; PF06293.14; PF00069.25	6573_0:005b42	1097975at2759	Protein kinase domain	R-BTA-195253; R-BTA-196299; R-BTA-5610785; R-BTA-5635838	Degradation of beta-catenin by the destruction complex; Beta-catenin phosphorylation cascade; GLI3 is processed to GLI3R by the proteasome; Activation of SMO
TRINITY_DN2295_c4_g1_i1					PF10034.9
TRINITY_DN23236_c0_g1_i1	sp|Q9D855|QCR7_MOUSE	Q9D855	GO:0070469; GO:0006122; GO:0005743; GO:0009060; GO:0005739; GO:0016020; GO:0005750	Cytochrome b-c1 complex subunit 7 OS=Mus musculus OX=10090 GN=Uqcrb PE=1 SV=3	PF02271.16	456900_0:001be5	123961at33392	Cytochrome b-c1 complex subunit 7
TRINITY_DN23259_c0_g1_i11					PF13105.6; PF07406.11	6573_0:001543	1310184at2759	Predicted protein
TRINITY_DN2330_c0_g1_i10	sp|Q498J9|MBLC1_XENLA	Q498J9	GO:0046872; GO:0016787	Metallo-beta-lactamase domain-containing protein 1 OS=Xenopus laevis OX=8355 GN=mblac1 PE=2 SV=2	PF12706.7; PF00753.27; PF13483.6	29159_0:003aee	1139836at2759	Metallo-beta-lactamase
TRINITY_DN23399_c0_g1_i6						7574_0:004ff7	1626262at2759	uncharacterized protein LOC100888786
TRINITY_DN2356_c0_g1_i1	sp|Q28DR7|DCTN6_XENTR	Q28DR7	GO:0005694; GO:0005856; GO:0005869; GO:0005737; GO:0000777; GO:0000775; GO:0000776	Dynactin subunit 6 OS=Xenopus tropicalis OX=8364 GN=dctn6 PE=2 SV=1		6573_0:004830	1278795at2759	dynactin subunit 6	R-XTR-2132295; R-XTR-3371497; R-XTR-6807878; R-XTR-6811436	MHC class II antigen presentation; HSP90 chaperone cycle for steroid hormone receptors (SHR); COPI-mediated anterograde transport; COPI-independent Golgi-to-ER retrograde traffic
TRINITY_DN23658_c0_g1_i1						6573_0:00105d	16335at6447	uncharacterized protein LOC109618122
TRINITY_DN23740_c0_g2_i3	sp|Q5RB45|ENPP6_PONAB	Q5RB45	GO:0016787; GO:0047390; GO:0019695; GO:0031225; GO:0005576; GO:0006629; GO:0016042; GO:0005886; GO:0046872; GO:0003824; GO:0008081; GO:0016020	Ectonucleotide pyrophosphatase/phosphodiesterase family member 6 OS=Pongo abelii OX=9601 GN=ENPP6 PE=2 SV=2		29159_0:002f00	471758at33208	ectonucleotide pyrophosphatase/phosphodiesterase family member 6
TRINITY_DN2389_c0_g1_i2	sp|Q6T6S5|VKT2_BITGA	Q6T6S5	GO:0010951; GO:0010466; GO:0005576; GO:0030414; GO:0004867	Kunitz-type serine protease inhibitor bitisilin-2 OS=Bitis gabonica OX=8694 PE=1 SV=1		407821_0:00235b	1009074at2759	Tissue factor pathway inhibitor
TRINITY_DN24017_c0_g1_i1						6573_0:003f43	1485195at2759	urokinase plasminogen activator surface receptor-like
TRINITY_DN2408_c1_g2_i1	sp|Q8VID6|PDE11_RAT	Q8VID6	GO:0043951; GO:0016787; GO:0030553; GO:0007165; GO:0005737; GO:0004112; GO:0004118; GO:0004114; GO:0043204; GO:0004115; GO:0046872; GO:0005829; GO:0003824; GO:0008152; GO:0047555; GO:0008081; GO:0010754	Dual 3',5'-cyclic-AMP and -GMP phosphodiesterase 11A OS=Rattus norvegicus OX=10116 GN=Pde11a PE=1 SV=1	PF13492.6; PF01590.26; PF00233.19; PF13185.6; PF11849.8	29159_0:004579	114875at33208	Phosphodiesterase	R-RNO-418457; R-RNO-418555	cGMP effects; G alpha (s) signalling events
TRINITY_DN2411_c0_g1_i1	sp|Q8C6U2|PQLC3_MOUSE	Q8C6U2	GO:0016021; GO:0003674; GO:0016020	PQ-loop repeat-containing protein 3 OS=Mus musculus OX=10090 GN=Pqlc3 PE=1 SV=1	PF06256.11; PF04193.14	225164_0:0033f1	1059579at2759	mannose-P-dolichol utilization defect 1 protein
TRINITY_DN24110_c0_g1_i1					PF05767.12; PF03907.13
TRINITY_DN24110_c3_g1_i1					PF00024.26; PF12998.7	225164_0:000a52	20739at6447	uncharacterized protein LOC110440600 isoform X1
TRINITY_DN24192_c0_g1_i1	sp|Q5R5S9|TYW3_PONAB	Q5R5S9	GO:0032259; GO:0008033; GO:0008168; GO:0016740	tRNA wybutosine-synthesizing protein 3 homolog OS=Pongo abelii OX=9601 GN=TYW3 PE=2 SV=1	PF17293.2; PF02676.14	10224_0:000a86	1313208at2759	tRNA wybutosine-synthesizing protein 3 homolog
TRINITY_DN2426_c0_g1_i4					PF06679.12
TRINITY_DN24303_c0_g1_i3					PF05699.14; PF16566.5	48498_0:000ed1	11483at6101	uncharacterized protein LOC110042288
TRINITY_DN24385_c0_g1_i1	sp|Q9GJW7|GBRAP_BOVIN	Q9GJW7	GO:0050811; GO:0000422; GO:0005737; GO:0015031; GO:0005930; GO:0005794; GO:0016020; GO:0005874; GO:0006915; GO:0031410; GO:0000226; GO:0005875; GO:0005856; GO:0000045; GO:0006995; GO:0031625; GO:0005776; GO:0000421; GO:0005829; GO:0016236; GO:0006914; GO:0048487	Gamma-aminobutyric acid receptor-associated protein OS=Bos taurus OX=9913 GN=GABARAP PE=3 SV=2	PF04110.13; PF02991.16	50429_0:001624	1508198at2759	Autophagy-related protein	R-BTA-1632852; R-BTA-8854214	Macroautophagy; TBC/RABGAPs
TRINITY_DN2439_c0_g2_i1						225164_0:004500	10464at6447	protein PLANT CADMIUM RESISTANCE 3-like isoform X3
TRINITY_DN24390_c0_g2_i1	sp|Q66I68|CNFN_DANRE	Q66I68	GO:0008150; GO:0001533; GO:0003674	Cornifelin homolog OS=Danio rerio OX=7955 GN=cnfn PE=3 SV=1	PF06423.12; PF04145.15	29159_0:006ac1	11708at1206795	placenta-specific gene 8 protein-like isoform X1
TRINITY_DN2441_c0_g1_i2	sp|P23198|CBX3_MOUSE	P23198	GO:0090575; GO:1990226; GO:0000976; GO:0048511; GO:0045892; GO:0000785; GO:0005819; GO:0010369; GO:0035985; GO:0000792; GO:0000791; GO:0042802; GO:0005515; GO:0005634; GO:0006325; GO:0090734; GO:0019899	Chromobox protein homolog 3 OS=Mus musculus OX=10090 GN=Cbx3 PE=1 SV=2	PF01393.19; PF00385.24	37653_0:001c95	1628171at2759	Chromo domain	R-MMU-73772; R-MMU-8953750	RNA Polymerase I Promoter Escape; Transcriptional Regulation by E2F6
TRINITY_DN2441_c0_g2_i2	sp|P23198|CBX3_MOUSE	P23198	GO:0090575; GO:1990226; GO:0000976; GO:0048511; GO:0045892; GO:0000785; GO:0005819; GO:0010369; GO:0035985; GO:0000792; GO:0000791; GO:0042802; GO:0005515; GO:0005634; GO:0006325; GO:0090734; GO:0019899	Chromobox protein homolog 3 OS=Mus musculus OX=10090 GN=Cbx3 PE=1 SV=2	PF01393.19; PF12569.8; PF00385.24	37653_0:001c95	1628171at2759	Chromo domain	R-MMU-73772; R-MMU-8953750	RNA Polymerase I Promoter Escape; Transcriptional Regulation by E2F6
TRINITY_DN2452_c0_g3_i2					PF13267.6; PF11947.8	29159_0:00489c	1343623at2759	HTH CenpB-type DNA-binding domain
TRINITY_DN2454_c1_g1_i7						217634_0:003628	115387at33392	Transposable element tc3 transposase
TRINITY_DN2456_c0_g1_i7	sp|P30352|SRSF2_CHICK	P30352	GO:0000381; GO:0036002; GO:0005681; GO:0008380; GO:0003676; GO:0005737; GO:0003723; GO:0006397; GO:0000398; GO:0005634; GO:0016607	Serine/arginine-rich splicing factor 2 OS=Gallus gallus OX=9031 GN=SRSF2 PE=2 SV=1	PF00076.22; PF13893.6; PF14605.6	6973_0:000e83	148483at50557	serine/arginine-rich splicing factor 2	R-GGA-72163; R-GGA-72165; R-GGA-72187; R-GGA-73856	mRNA Splicing - Major Pathway; mRNA Splicing - Minor Pathway; mRNA 3'-end processing; RNA Polymerase II Transcription Termination
TRINITY_DN2460_c0_g1_i4	sp|Q09811|HUS2_SCHPO	Q09811	GO:0045950; GO:0003678; GO:0031573; GO:0000166; GO:0000228; GO:0003677; GO:0005524; GO:0043596; GO:0005730; GO:0071140; GO:0032508; GO:0000724; GO:0005515; GO:0006974; GO:0005634; GO:0031297; GO:1903221; GO:0000725; GO:1990426; GO:0043138	ATP-dependent DNA helicase hus2/rqh1 OS=Schizosaccharomyces pombe (strain 972 / ATCC 24843) OX=284812 GN=rqh1 PE=1 SV=1	PF00271.31; PF16124.5	29159_0:005f64	1514691at2759	uncharacterized protein LOC107343237	R-SPO-5685938; R-SPO-5693607	HDR through Single Strand Annealing (SSA); Processing of DNA double-strand break ends
TRINITY_DN2480_c0_g2_i1					PF03104.19; PF16473.5; PF13482.6; PF14050.6; PF00929.24	6565_0:0060f4	1365966at2759	three-prime repair exonuclease 1
TRINITY_DN2481_c0_g1_i10	sp|O60290|ZN862_HUMAN	O60290	GO:0046983; GO:0006355; GO:0008150; GO:0005575; GO:0046872; GO:0005634; GO:0003674	Zinc finger protein 862 OS=Homo sapiens OX=9606 GN=ZNF862 PE=2 SV=2	PF02992.14; PF06869.12	29159_0:0002ed	12811at6447	uncharacterized protein LOC110451260
TRINITY_DN24871_c0_g1_i1	sp|E7EYQ9|TM216_DANRE	E7EYQ9	GO:0005856; GO:0035869; GO:0042995; GO:0005737; GO:1905515; GO:0016021; GO:0030030; GO:0060271; GO:0016020	Transmembrane protein 216 OS=Danio rerio OX=7955 GN=tmem216 PE=3 SV=1	PF09799.9	6565_0:005da7	1584392at2759	transmembrane protein 216	R-DRE-5620912	Anchoring of the basal body to the plasma membrane
TRINITY_DN25100_c0_g1_i2					PF00023.30; PF13637.6; PF13857.6; PF04532.12; PF14931.6; PF12796.7; PF13606.6	6573_0:0017fe	1453555at2759	uncharacterized protein LOC101860096
TRINITY_DN25140_c0_g1_i1					PF02468.15; PF05545.11; PF00001.21; PF15202.6
TRINITY_DN2533_c0_g2_i1						407821_0:0054a1	1631911at2759	uncharacterized protein LOC109464576
TRINITY_DN25607_c0_g1_i1	sp|Q9VJ38|RM13_DROME	Q9VJ38	GO:0017148; GO:0005762; GO:0003735; GO:0003729; GO:0032543; GO:0005739; GO:0005840; GO:0006412	39S ribosomal protein L13, mitochondrial OS=Drosophila melanogaster OX=7227 GN=mRpL13 PE=2 SV=2	PF00572.18	6573_0:002dd2	1119705at2759	Ribosomal protein L13	R-DME-5389840; R-DME-5419276	Mitochondrial translation elongation; Mitochondrial translation termination
TRINITY_DN2574_c0_g1_i14	sp|Q641G7|ARPC4_XENLA	Q641G7	GO:0003779; GO:0005856; GO:0035861; GO:0042995; GO:0005737; GO:0015629; GO:0030041; GO:0005634; GO:0034314; GO:0005885; GO:0030833	Actin-related protein 2/3 complex subunit 4 OS=Xenopus laevis OX=8355 GN=arpc4 PE=1 SV=1	PF05856.12	37653_0:003be0	1351067at2759	Actin-related protein 2/3 complex subunit 4
TRINITY_DN26_c2_g3_i1	sp|P61758|PFD3_HUMAN	P61758	GO:0005737; GO:0006457; GO:0051082; GO:0001540; GO:0005515; GO:1905907; GO:0016272	Prefoldin subunit 3 OS=Homo sapiens OX=9606 GN=VBP1 PE=1 SV=4	PF08702.10; PF12761.7; PF02403.22; PF07889.12; PF14527.6; PF16348.5; PF01920.20; PF02996.17; PF06103.11	6565_0:005d3a	1567796at2759	Prefoldin subunit 3	R-HSA-389957	Prefoldin mediated transfer of substrate to CCT/TriC
TRINITY_DN260_c2_g3_i3	sp|Q8NBT2|SPC24_HUMAN	Q8NBT2	GO:0005694; GO:0031262; GO:0005654; GO:0000776; GO:0051301; GO:0005634; GO:0005829; GO:0000777; GO:0000775; GO:0005730; GO:0007049	Kinetochore protein Spc24 OS=Homo sapiens OX=9606 GN=SPC24 PE=1 SV=2	PF14362.6; PF17675.1; PF12329.8; PF04518.12; PF02601.15; PF13240.6; PF06156.13; PF16591.5; PF04799.13; PF09787.9; PF11932.8; PF10186.9; PF08286.11	133434_0:0004bd	1602618at2759	kinetochore protein Spc24	R-HSA-141444; R-HSA-2467813; R-HSA-2500257; R-HSA-5663220; R-HSA-68877	Amplification of signal from unattached kinetochores via a MAD2 inhibitory signal; Separation of Sister Chromatids; Resolution of Sister Chromatid Cohesion; RHO GTPases Activate Formins; Mitotic Prometaphase
TRINITY_DN2621_c0_g2_i2						6573_0:0022a5	11223at6447	uncharacterized protein C1orf189 homolog
TRINITY_DN26261_c0_g1_i2	sp|Q32KN5|DNAL4_BOVIN	Q32KN5	GO:0005856; GO:0005874; GO:0042995; GO:0005737; GO:0007017; GO:0051959; GO:0030286; GO:0005929; GO:0042802; GO:0045505; GO:2000582	Dynein light chain 4, axonemal OS=Bos taurus OX=9913 GN=DNAL4 PE=3 SV=1		29159_0:000697	1520814at2759	Dynein light chain
TRINITY_DN2639_c0_g1_i4	sp|Q8TD35|LKAM1_HUMAN	Q8TD35	GO:0005515	Protein LKAAEAR1 OS=Homo sapiens OX=9606 GN=LKAAEAR1 PE=2 SV=3	PF06667.12; PF15478.6	225164_0:005829	1320680at2759	protein LKAAEAR1
TRINITY_DN2639_c0_g2_i1	sp|Q8TD35|LKAM1_HUMAN	Q8TD35	GO:0005515	Protein LKAAEAR1 OS=Homo sapiens OX=9606 GN=LKAAEAR1 PE=2 SV=3		6500_0:00259c	1320680at2759	protein LKAAEAR1
TRINITY_DN2663_c0_g1_i4					PF02301.18; PF08059.13; PF06518.11; PF04791.16; PF11744.8
TRINITY_DN26746_c0_g4_i1	sp|Q29RL9|TCEA1_BOVIN	Q29RL9	GO:0008270; GO:0003677; GO:0006355; GO:0003676; GO:0046872; GO:0005634; GO:0045944; GO:0006351	Transcription elongation factor A protein 1 OS=Bos taurus OX=9913 GN=TCEA1 PE=2 SV=1	PF07500.14; PF01096.18; PF10545.9; PF13408.6; PF08711.11	6500_0:0036ef	1579101at2759	Transcription elongation factor S-II
TRINITY_DN26780_c1_g2_i3	sp|Q4PM47|RS29_IXOSC	Q4PM47	GO:0008270; GO:0005791; GO:0003735; GO:0022627; GO:0005783; GO:0005737; GO:0002181; GO:0046872; GO:0005829; GO:0005840; GO:0006412; GO:0042788	40S ribosomal protein S29 OS=Ixodes scapularis OX=6945 GN=RpS29 PE=3 SV=1		6573_0:000852	12076at1206795	V3ZSD5_LOTGI
TRINITY_DN26788_c0_g1_i2					PF00616.19
TRINITY_DN26788_c0_g2_i1					PF00616.19
TRINITY_DN26846_c0_g1_i2					PF13405.6; PF13499.6; PF13202.6; PF10591.9; PF13833.6; PF00036.32	6565_0:002abf	18126at6447	uncharacterized protein LOC111125069
TRINITY_DN26846_c0_g2_i3						6565_0:002a92	909079at2759	EF-hand domain
TRINITY_DN2685_c0_g1_i13						6565_0:0055d3	12631at6447	uncharacterized protein LOC105331337
TRINITY_DN26854_c0_g1_i1						29159_0:005114	10108at6447	High mobility group box domain
TRINITY_DN2694_c0_g1_i2	sp|Q20681|BAT38_CAEEL	Q20681		BTB and MATH domain-containing protein 38 OS=Caenorhabditis elegans OX=6239 GN=bath-38 PE=4 SV=1	PF00651.31	29159_0:006101	17000at6447	uncharacterized protein LOC105321418
TRINITY_DN2724_c0_g1_i3					PF09254.11	10224_0:005161	1374327at2759	DNase I-like protein
TRINITY_DN27284_c0_g1_i1	sp|P61282|NEDD8_BOVIN	P61282	GO:0008104; GO:0019941; GO:0005737; GO:0016567; GO:0031625; GO:0005634; GO:0031386; GO:0006357; GO:0045116; GO:0030162	NEDD8 OS=Bos taurus OX=9913 GN=NEDD8 PE=3 SV=1		29159_0:005252	11220at6447	NEDD8
TRINITY_DN27284_c0_g2_i1	sp|P61282|NEDD8_BOVIN	P61282	GO:0008104; GO:0019941; GO:0005737; GO:0016567; GO:0031625; GO:0005634; GO:0031386; GO:0006357; GO:0045116; GO:0030162	NEDD8 OS=Bos taurus OX=9913 GN=NEDD8 PE=3 SV=1		29159_0:005252	11220at6447	NEDD8
TRINITY_DN27315_c0_g2_i2	sp|Q9CQ66|TC1D2_MOUSE	Q9CQ66	GO:0097546; GO:0005868; GO:0005813; GO:0005930; GO:1905799; GO:0005929; GO:0031021; GO:0000922; GO:0035721; GO:0060271; GO:0045505; GO:1902017	Tctex1 domain-containing protein 2 OS=Mus musculus OX=10090 GN=Tctex1d2 PE=1 SV=1	PF03645.13	6573_0:000df3	1434909at2759	tctex1 domain-containing protein 2	R-MMU-5620924	Intraflagellar transport
TRINITY_DN27437_c0_g2_i1						6565_0:0055d3	12631at6447	uncharacterized protein LOC105331337
TRINITY_DN27701_c0_g4_i1	sp|Q93104|ERH_AEDAE	Q93104	GO:0007049	Enhancer of rudimentary homolog OS=Aedes aegypti OX=7159 PE=3 SV=1	PF15467.6; PF01133.17	29159_0:0067ea	10168at1206795	Enhancer of rudimentary homolog
TRINITY_DN2774_c1_g1_i1	sp|Q9QUR7|PIN1_MOUSE	Q9QUR7	GO:1902430; GO:0090263; GO:0051219; GO:0031647; GO:0003774; GO:0030182; GO:0005737; GO:0050808; GO:0016853; GO:0008013; GO:0005829; GO:0005634; GO:0003755; GO:0050821; GO:0001666; GO:0007049; GO:0000413	Peptidyl-prolyl cis-trans isomerase NIMA-interacting 1 OS=Mus musculus OX=10090 GN=Pin1 PE=1 SV=1	PF00397.26; PF00639.21; PF13145.6; PF18479.1; PF13616.6	6565_0:002213	1437969at2759	Peptidyl-prolyl cis-trans isomerase	R-MMU-5668599; R-MMU-6804756; R-MMU-6811555; R-MMU-936440	RHO GTPases Activate NADPH Oxidases; Regulation of TP53 Activity through Phosphorylation; PI5P Regulates TP53 Acetylation; Negative regulators of DDX58/IFIH1 signaling
TRINITY_DN27809_c0_g1_i1	sp|P27074|RL44Q_CANMA	P27074	GO:0003735; GO:0046677; GO:0046898; GO:0005840; GO:0006412	60S ribosomal protein L44 Q OS=Candida maltosa OX=5479 GN=RIM-C PE=3 SV=2	PF00935.19	45351_0:00332b	1392093at2759	60S ribosomal protein L36a-like
TRINITY_DN27906_c0_g5_i1	sp|Q8MQI6|ELOF1_DROME	Q8MQI6	GO:0048096; GO:0008150; GO:0006368; GO:0005575; GO:0000993; GO:0046872; GO:0003674; GO:0005634; GO:0008023	Transcription elongation factor 1 homolog OS=Drosophila melanogaster OX=7227 GN=CG40228 PE=3 SV=1		6945_0:002ae2	1630132at2759	Transcription elongation factor 1 homolog
TRINITY_DN2796_c0_g1_i1	sp|Q96Q77|CIB3_HUMAN	Q96Q77	GO:0000287; GO:0005509; GO:0005515; GO:0046872	Calcium and integrin-binding family member 3 OS=Homo sapiens OX=9606 GN=CIB3 PE=1 SV=3	PF13405.6; PF08640.11; PF13499.6; PF11829.8; PF10591.9; PF13833.6; PF00036.32	29159_0:0043c6	1271942at2759	EF-hand domain
TRINITY_DN2804_c0_g1_i3	sp|B1AXD8|AKIR2_MOUSE	B1AXD8	GO:0000122; GO:0003712; GO:0045087; GO:0000785; GO:0045892; GO:0005654; GO:0032496; GO:0007275; GO:0010950; GO:0017053; GO:0010629; GO:0002376; GO:0042802; GO:0045089; GO:0005515; GO:0045944; GO:0005634; GO:0019899; GO:0008284; GO:0032755	Akirin-2 OS=Mus musculus OX=10090 GN=Akirin2 PE=1 SV=1	PF09892.9	6565_0:005d09	1420469at2759	akirin-2
TRINITY_DN2804_c0_g2_i1	sp|P23934|NDUS6_BOVIN	P23934	GO:0070469; GO:0005743; GO:0005739; GO:0005747; GO:0016020; GO:0006120	NADH dehydrogenase [ubiquinone] iron-sulfur protein 6, mitochondrial OS=Bos taurus OX=9913 GN=NDUFS6 PE=1 SV=2	PF10276.9	225164_0:0006ab	10019at6447	NADH dehydrogenase	R-BTA-611105; R-BTA-6799198	Respiratory electron transport; Complex I biogenesis
TRINITY_DN2806_c0_g1_i1	sp|O73817|PSB3_ONCMY	O73817	GO:0051603; GO:0005737; GO:0000502; GO:0043161; GO:0019774; GO:0005634; GO:0005839; GO:0004298	Proteasome subunit beta type-3 OS=Oncorhynchus mykiss OX=8022 GN=psmb3 PE=2 SV=1	PF00227.26	7741_0:003af1	1170036at2759	Proteasome subunit beta type
TRINITY_DN2817_c0_g1_i2	sp|P27049|BTG2_RAT	P27049	GO:0005737; GO:0010243; GO:0021954; GO:0009952; GO:0010033; GO:0008285; GO:0005575; GO:0005634; GO:0008306; GO:0060213; GO:0043434; GO:0035914; GO:0017148; GO:0000122; GO:0009612; GO:0006974; GO:0045930; GO:0003714; GO:0030182; GO:0043524; GO:0043066; GO:0051602	Protein BTG2 OS=Rattus norvegicus OX=10116 GN=Btg2 PE=1 SV=1	PF07742.12	6573_0:0055f2	11043at6447	B-cell translocation gene 1	R-RNO-6804115	TP53 regulates transcription of additional cell cycle genes whose exact role in the p53 pathway remain uncertain
TRINITY_DN282_c1_g3_i2	sp|P62147|CALM1_BRAFL	P62147	GO:0005509; GO:0046872; GO:0019722	Calmodulin-1 OS=Branchiostoma floridae OX=7739 PE=2 SV=2	PF12763.7; PF00404.18; PF05184.15; PF10591.9; PF17743.1; PF08726.10; PF03874.16; PF14924.6; PF14658.6; PF07499.13; PF02906.14; PF13833.6; PF05042.13; PF09114.10; PF17959.1; PF08269.11; PF02563.16; PF13405.6; PF13499.6; PF10025.9; PF13202.6; PF06513.11; PF08976.11; PF13623.6; PF14246.6; PF02627.20; PF03672.13; PF09548.10; PF11829.8; PF05099.13; PF00036.32	1155016_0:000563	1651546at2759	Calmodulin antisense orf
TRINITY_DN28278_c1_g1_i1						37653_0:001f10	1268544at2759	Reverse transcriptase
TRINITY_DN28639_c0_g1_i8	sp|Q0V9X5|BHE22_XENTR	Q0V9X5	GO:0046983; GO:0006355; GO:0000978; GO:0030182; GO:0000981; GO:0022008; GO:0005634; GO:0006357	Class E basic helix-loop-helix protein 22 OS=Xenopus tropicalis OX=8364 GN=bhlhe22 PE=2 SV=1		29159_0:0000dd	11199at6447	V4B2J9_LOTGI
TRINITY_DN2909_c0_g1_i1	sp|Q5ZMM5|ZN706_CHICK	Q5ZMM5	GO:1902455; GO:0045892; GO:0005737; GO:0006417; GO:0046872; GO:0005634	Zinc finger protein 706 OS=Gallus gallus OX=9031 GN=ZNF706 PE=3 SV=1		45351_0:0051f6	1620202at2759	zinc finger protein 706	R-GGA-212436	Generic Transcription Pathway
TRINITY_DN2916_c0_g1_i1						6412_0:005ad5	1590886at2759	predicted protein
TRINITY_DN29330_c0_g1_i1					PF17556.2	6565_0:0043b1	11545at6447	uncharacterized protein LOC106061497
TRINITY_DN29461_c0_g2_i4	sp|P74615|Y1483_SYNY3	P74615	GO:0030288; GO:0005615	Uncharacterized protein sll1483 OS=Synechocystis sp. (strain PCC 6803 / Kazusa) OX=1111708 GN=sll1483 PE=3 SV=1		6500_0:0045a0	395206at33208	transforming growth factor-beta-induced protein ig-h3
TRINITY_DN2949_c0_g2_i2	sp|Q5VV17|OTUD1_HUMAN	Q5VV17	GO:0016579; GO:0008234; GO:0016787; GO:0006508; GO:0004843; GO:0008233; GO:0070536; GO:0018215	OTU domain-containing protein 1 OS=Homo sapiens OX=9606 GN=OTUD1 PE=1 SV=1	PF02338.19; PF10275.9	6565_0:002b93	10185at1206795	uncharacterized protein LOC106078374
TRINITY_DN29623_c1_g2_i1	sp|Q8K0U4|HS12A_MOUSE	Q8K0U4	GO:0000166; GO:0008150; GO:0005524; GO:0005737; GO:0005634; GO:0003674	Heat shock 70 kDa protein 12A OS=Mus musculus OX=10090 GN=Hspa12a PE=1 SV=1	PF06723.13; PF18550.1; PF00012.20; PF02782.16	6565_0:0028d3	12604at6447	heat shock 70 kDa protein 12A	R-MMU-3371453	Regulation of HSF1-mediated heat shock response
TRINITY_DN29628_c1_g2_i1	sp|Q96DY2|DRC10_HUMAN	Q96DY2	GO:0036064; GO:0005856; GO:0042995; GO:0005737; GO:0031514; GO:0005515; GO:0005929	Dynein regulatory complex protein 10 OS=Homo sapiens OX=9606 GN=IQCD PE=2 SV=2	PF00612.27; PF03670.13	29159_0:003baa	1011316at2759	IQ domain-containing protein D
TRINITY_DN2976_c0_g1_i4	sp|Q53H47|SETMR_HUMAN	Q53H47	GO:0071157; GO:0005694; GO:0003677; GO:0042803; GO:0000737; GO:2001034; GO:0004519; GO:0000729; GO:0005515; GO:0006974; GO:0005634; GO:0003824; GO:2001251; GO:0008168; GO:0005730	Histone-lysine N-methyltransferase SETMAR OS=Homo sapiens OX=9606 GN=SETMAR PE=1 SV=2		29159_0:006a37	1553369at2759	Transposable element Tc1 transposase
TRINITY_DN30371_c0_g1_i6						6565_0:0056a0	16466at6447	uncharacterized protein LOC111124207
TRINITY_DN3066_c0_g1_i6					PF15099.6; PF13908.6; PF15102.6; PF14575.6; PF10873.8; PF08374.11; PF04478.12
TRINITY_DN3073_c0_g3_i1	sp|P47813|IF1AX_HUMAN	P47813	GO:0006413; GO:0008135; GO:0016032; GO:0003723; GO:0005515; GO:0005829; GO:0006412; GO:0003743	Eukaryotic translation initiation factor 1A, X-chromosomal OS=Homo sapiens OX=9606 GN=EIF1AX PE=1 SV=2		35525_0:003a14	1426335at2759	eukaryotic translation initiation factor 1A, X-chromosomal	R-HSA-156827; R-HSA-72649; R-HSA-72689; R-HSA-72695; R-HSA-72702; R-HSA-72706	L13a-mediated translational silencing of Ceruloplasmin expression; Translation initiation complex formation; Formation of a pool of free 40S subunits; Formation of the ternary complex, and subsequently, the 43S complex; Ribosomal scanning and start codon recognition; GTP hydrolysis and joining of the 60S ribosomal subunit
TRINITY_DN3073_c0_g4_i2	sp|P47813|IF1AX_HUMAN	P47813	GO:0006413; GO:0008135; GO:0016032; GO:0003723; GO:0005515; GO:0005829; GO:0006412; GO:0003743	Eukaryotic translation initiation factor 1A, X-chromosomal OS=Homo sapiens OX=9606 GN=EIF1AX PE=1 SV=2		438502_0:005b1c	1426335at2759	eukaryotic translation initiation factor 1A, X-chromosomal	R-HSA-156827; R-HSA-72649; R-HSA-72689; R-HSA-72695; R-HSA-72702; R-HSA-72706	L13a-mediated translational silencing of Ceruloplasmin expression; Translation initiation complex formation; Formation of a pool of free 40S subunits; Formation of the ternary complex, and subsequently, the 43S complex; Ribosomal scanning and start codon recognition; GTP hydrolysis and joining of the 60S ribosomal subunit
TRINITY_DN308_c1_g1_i9					PF03907.13
TRINITY_DN3087_c0_g1_i2						7668_0:0047aa	1625853at2759	trypsin Inhibitor like cysteine rich domain protein
TRINITY_DN3116_c0_g2_i2	sp|Q5M8Z2|PREY_XENTR	Q5M8Z2	GO:0005739; GO:0000506; GO:0006506	Protein preY, mitochondrial OS=Xenopus tropicalis OX=8364 GN=pyurf PE=2 SV=1	PF03966.16	1608454_0:009be4	133400at7898	protein preY, mitochondrial
TRINITY_DN3120_c0_g1_i1						7574_0:0050da	1578909at2759	uncharacterized protein LOC110990471
TRINITY_DN31477_c2_g1_i1					PF14730.6	6565_0:0017e4	15460at6447	uncharacterized protein LOC111118861
TRINITY_DN3162_c0_g1_i19	sp|F6TQD1|RN212_MOUSE	F6TQD1	GO:0005694; GO:0006311; GO:0019789; GO:0007129; GO:0016925; GO:0007131; GO:0051321; GO:0016740; GO:0051026; GO:0000795; GO:0046872; GO:0005634	Probable E3 SUMO-protein ligase RNF212 OS=Mus musculus OX=10090 GN=Rnf212 PE=1 SV=3	PF08702.10; PF16704.5; PF15669.5; PF18440.1; PF11559.8; PF14447.6; PF09798.9; PF02050.16; PF09304.10; PF03469.14; PF14634.6; PF04201.15; PF04799.13; PF12128.8	6573_0:0053fe	10930at6447	Zinc finger, RING-type
TRINITY_DN31921_c0_g1_i1					PF00836.19; PF05434.11
TRINITY_DN3202_c0_g1_i2					PF00166.21; PF15674.5	6573_0:0044f6	11845at6447	uncharacterized protein LOC111135390
TRINITY_DN3202_c0_g2_i1					PF13945.6; PF00166.21; PF07543.12
TRINITY_DN32024_c0_g1_i1						6087_0:004723	693056at2759	Predicted protein
TRINITY_DN32103_c0_g1_i1					PF17675.1; PF08586.10; PF06785.11; PF14197.6; PF12761.7; PF15898.5; PF05377.11; PF08317.11; PF06156.13; PF09726.9	6565_0:001666	422299at33208	coiled-coil domain-containing protein 166
TRINITY_DN3228_c0_g2_i1						8153_0:00597b	1314811at2759	Serine proteases, trypsin domain
TRINITY_DN3230_c0_g1_i1	sp|O09111|NDUBB_MOUSE	O09111	GO:0070469; GO:0032981; GO:0005743; GO:0005739; GO:0005747; GO:0016021; GO:0003674; GO:0016020	NADH dehydrogenase [ubiquinone] 1 beta subcomplex subunit 11, mitochondrial OS=Mus musculus OX=10090 GN=Ndufb11 PE=1 SV=2	PF13776.6; PF10183.9	6500_0:0048d1	11740at6447	NADH dehydrogenase	R-MMU-611105; R-MMU-6799198	Respiratory electron transport; Complex I biogenesis
TRINITY_DN32572_c0_g1_i1	sp|Q5ZJQ3|LIN52_CHICK	Q5ZJQ3	GO:0006351; GO:0070176	Protein lin-52 homolog OS=Gallus gallus OX=9031 GN=LIN52 PE=1 SV=1	PF10044.9	29159_0:002e25	10564at6447	protein lin-52 homolog
TRINITY_DN3262_c0_g1_i7					PF04341.12
TRINITY_DN32647_c0_g1_i3	sp|Q505B8|SYCE2_MOUSE	Q505B8	GO:0005694; GO:0005654; GO:0051321; GO:0007130; GO:0000795; GO:0051301; GO:0005634; GO:0005515; GO:0007049; GO:0000801	Synaptonemal complex central element protein 2 OS=Mus musculus OX=10090 GN=Syce2 PE=1 SV=1	PF16078.5; PF12700.7; PF05597.11; PF11473.8; PF02601.15; PF03063.20; PF08700.11	7739_0:00589f	1609382at2759	uncharacterized protein LOC111087020
TRINITY_DN32850_c0_g1_i2						6573_0:0055a8	1525367at2759	spermatogenesis-associated protein 45
TRINITY_DN32871_c1_g2_i1						6565_0:003e59	1231039at2759	putative uncharacterized protein CXorf58 homolog
TRINITY_DN33004_c2_g1_i1	sp|Q8BMC1|VATG3_MOUSE	Q8BMC1	GO:0042626; GO:0046961; GO:0016471; GO:0005886; GO:1902600; GO:0005829; GO:0051117; GO:0006811; GO:0016020	V-type proton ATPase subunit G 3 OS=Mus musculus OX=10090 GN=Atp6v1g3 PE=1 SV=1		37653_0:002d62	11374at6447	V-type proton ATPase subunit G	R-MMU-1222556; R-MMU-77387; R-MMU-917977; R-MMU-983712	ROS and RNS production in phagocytes; Insulin receptor recycling; Transferrin endocytosis and recycling; Ion channel transport
TRINITY_DN3321_c0_g1_i2					PF08782.10
TRINITY_DN3346_c1_g1_i1					PF17965.1	6573_0:000468	11451at6447	uncharacterized protein LOC109617181
TRINITY_DN33640_c1_g1_i1	sp|Q9DAD0|CA194_MOUSE	Q9DAD0	GO:0015232; GO:0005737; GO:0005856; GO:0020037; GO:0097037	Uncharacterized protein C1orf194 homolog OS=Mus musculus OX=10090 PE=2 SV=1		6573_0:000a42	1429280at2759	uncharacterized protein C1orf194 homolog
TRINITY_DN3366_c0_g1_i2						6565_0:001559	1389489at2759	UPF0573 protein C2orf70 homolog
TRINITY_DN3366_c0_g2_i3						6565_0:001559	1389489at2759	UPF0573 protein C2orf70 homolog
TRINITY_DN33804_c0_g3_i1					PF12353.8	6565_0:0022ac	120652at33208	Ribonuclease H superfamily
TRINITY_DN3382_c0_g1_i2					PF00952.17; PF15314.6; PF09194.10; PF11929.8; PF07750.11; PF02962.15
TRINITY_DN3461_c1_g1_i1	sp|Q96AQ8|MCUR1_HUMAN	Q96AQ8	GO:0036444; GO:0005743; GO:0006851; GO:0006816; GO:0016021; GO:0005515; GO:0016020; GO:0006811; GO:0005739; GO:0031305; GO:0070509; GO:0051561	Mitochondrial calcium uniporter regulator 1 OS=Homo sapiens OX=9606 GN=MCUR1 PE=1 SV=1	PF07798.11; PF04521.13; PF17262.2; PF09304.10	29159_0:00043d	10100at6447	coiled-coil domain-containing protein 90B, mitochondrial-like
TRINITY_DN3472_c0_g1_i1						6573_0:001543	1310184at2759	Predicted protein
TRINITY_DN3472_c0_g2_i2						29159_0:002d40	1310184at2759	Predicted protein
TRINITY_DN3477_c0_g1_i1					PF14666.6
TRINITY_DN3477_c0_g2_i2					PF18143.1
TRINITY_DN34991_c0_g1_i1	sp|P92177|1433E_DROME	P92177	GO:0040008; GO:0007294; GO:0009411; GO:0005694; GO:0007088; GO:0035332; GO:0005654; GO:0048190; GO:0005737; GO:0008340; GO:0008134; GO:0045172; GO:0046579; GO:0005813; GO:0005515; GO:0007411; GO:0005634; GO:0050815; GO:0005886; GO:0000077; GO:0042994	14-3-3 protein epsilon OS=Drosophila melanogaster OX=7227 GN=14-3-3epsilon PE=1 SV=2		7200_0:001139	267420at33208	Histone deacetylase	R-DME-2028269; R-DME-3371453; R-DME-3371511; R-DME-390098; R-DME-432553; R-DME-5625740; R-DME-5628897; R-DME-75035; R-DME-8876198	Signaling by Hippo; Regulation of HSF1-mediated heat shock response; HSF1 activation; Phosphorylation-dependent inhibition of YKI; Phosphorylation of PER and TIM; RHO GTPases activate PKNs; TP53 Regulates Metabolic Genes; Chk1/Chk2(Cds1) mediated inactivation of Cyclin B:Cdk1 complex; RAB GEFs exchange GTP for GDP on RABs
TRINITY_DN3531_c0_g1_i2	sp|Q28FE4|MORN5_XENTR	Q28FE4		MORN repeat-containing protein 5 OS=Xenopus tropicalis OX=8364 GN=morn5 PE=2 SV=1	PF02493.20	29159_0:00364b	1312559at2759	MORN repeat-containing protein 5
TRINITY_DN35523_c1_g1_i1						29159_0:000b31	11232at6447	Leucine-rich repeat
TRINITY_DN3560_c0_g1_i1	sp|A0A1L8ER70|HYLS1_XENLA	A0A1L8ER70	GO:0036064; GO:0005856; GO:0005814; GO:0042995; GO:0005737; GO:0030030; GO:0005929; GO:0060271	Hydrolethalus syndrome protein 1 homolog OS=Xenopus laevis OX=8355 GN=hyls-1 PE=1 SV=1	PF15311.6; PF16113.5; PF03020.15	6573_0:0005b6	1441118at2759	hydrolethalus syndrome protein 1
TRINITY_DN3582_c0_g1_i2	sp|Q6ZUT1|NKAP1_HUMAN	Q6ZUT1	GO:0042802; GO:0005515	Uncharacterized protein NKAPD1 OS=Homo sapiens OX=9606 GN=NKAPD1 PE=1 SV=2	PF15692.5	225164_0:005732	11868at6447	uncharacterized protein C11orf57-like
TRINITY_DN3591_c0_g2_i1	sp|Q6VTH5|RSPH1_CYPCA	Q6VTH5	GO:0005856; GO:0007283; GO:0051321; GO:0042995; GO:0007275; GO:0005737; GO:0030154; GO:0031514; GO:0005929	Radial spoke head 1 homolog OS=Cyprinus carpio OX=7962 GN=rsph1 PE=1 SV=1		6565_0:002bbe	1309439at2759	MORN repeat-containing protein 3
TRINITY_DN36_c0_g1_i8	sp|Q24117|DYL1_DROME	Q24117	GO:0035071; GO:0007476; GO:0007283; GO:0008407; GO:0005737; GO:1904801; GO:0007291; GO:0005874; GO:0042803; GO:0005856; GO:0005814; GO:0097718; GO:0030286; GO:0000132; GO:0005515; GO:0007290; GO:0045505; GO:0051017; GO:0051959; GO:0034454; GO:0006914; GO:0005868	Dynein light chain 1, cytoplasmic OS=Drosophila melanogaster OX=7227 GN=ctp PE=1 SV=1		8502_0:0025c7	1520814at2759	Dynein light chain	R-DME-1632852; R-DME-3371497; R-DME-5620924; R-DME-6798695; R-DME-6807878; R-DME-6811436	Macroautophagy; HSP90 chaperone cycle for steroid hormone receptors (SHR); Intraflagellar transport; Neutrophil degranulation; COPI-mediated anterograde transport; COPI-independent Golgi-to-ER retrograde traffic
TRINITY_DN3604_c0_g3_i1					PF11583.8
TRINITY_DN36052_c0_g1_i1	sp|Q6QNY1|BL1S2_HUMAN	Q6QNY1	GO:0099078; GO:0032418; GO:0005856; GO:0048490; GO:0005737; GO:0000930; GO:0005764; GO:0005515; GO:0016197; GO:0031083; GO:0008089; GO:0016020; GO:0043015; GO:0031175	Biogenesis of lysosome-related organelles complex 1 subunit 2 OS=Homo sapiens OX=9606 GN=BLOC1S2 PE=1 SV=1		6573_0:0044cf	10506at6447	biogenesis of lysosome-related organelles complex 1 subunit 2-like
TRINITY_DN36069_c3_g1_i1	sp|Q99932|SPAG8_HUMAN	Q99932	GO:0005856; GO:0007283; GO:0005819; GO:0008150; GO:0005737; GO:0030154; GO:0008017; GO:0005515; GO:0005634; GO:0007338; GO:0001669; GO:0031410; GO:0003674; GO:0016020; GO:0045944; GO:0007049	Sperm-associated antigen 8 OS=Homo sapiens OX=9606 GN=SPAG8 PE=1 SV=3		6573_0:003565	1071225at2759	sperm-associated antigen 8
TRINITY_DN36186_c0_g1_i1	sp|P61211|ARL1_MOUSE	P61211	GO:0000166; GO:0008047; GO:0034067; GO:0019904; GO:0005737; GO:0005802; GO:0048193; GO:0003924; GO:0031584; GO:0009404; GO:0005794; GO:0005829; GO:0016020; GO:0042147; GO:0007030; GO:0005525; GO:0000139	ADP-ribosylation factor-like protein 1 OS=Mus musculus OX=10090 GN=Arl1 PE=1 SV=1	PF03193.16; PF00005.27; PF09439.10; PF08477.13; PF00025.21; PF03308.16; PF01926.23; PF13238.6; PF02492.19; PF00071.22; PF00009.27; PF04670.12; PF13810.6; PF00503.20; PF10662.9; PF13662.6	29159_0:005d04	1271528at2759	Small GTPase superfamily, ARF/SAR type	R-MMU-6811440	Retrograde transport at the Trans-Golgi-Network
TRINITY_DN3630_c1_g1_i4	sp|Q9GKU5|HDA11_MACFA	Q9GKU5	GO:0004407; GO:0070932; GO:0016787; GO:0005737; GO:0008134; GO:0000118; GO:0016575; GO:0005634; GO:0006325; GO:0032041	Histone deacetylase 11 OS=Macaca fascicularis OX=9541 GN=HDAC11 PE=2 SV=2		37003_0:0001d3	1037375at2759	Histone deacetylase
TRINITY_DN3635_c0_g1_i10						29159_0:006844	16335at6447	uncharacterized protein LOC109618122
TRINITY_DN36662_c0_g1_i1	sp|Q3ZCU0|GVQW3_HUMAN	Q3ZCU0		Protein GVQW3 OS=Homo sapiens OX=9606 GN=GVQW3 PE=2 SV=1	PF16087.5; PF13565.6; PF13551.6; PF13518.6; PF13384.6; PF17906.1	13686_0:003636	10291at36668	putative uncharacterized protein FLJ37770
TRINITY_DN3683_c0_g1_i11	sp|O00370|LORF2_HUMAN	O00370	GO:0016787; GO:0016779; GO:0016740; GO:0004519; GO:0003964; GO:0046872; GO:0004518; GO:0032199; GO:0003824; GO:0009036; GO:0008152; GO:0006310; GO:0032197; GO:0090305	LINE-1 retrotransposable element ORF2 protein OS=Homo sapiens OX=9606 PE=1 SV=1	PF00078.27; PF03372.23; PF14529.6	106582_0:003377	1095535at2759	Reverse transcriptase
TRINITY_DN3689_c0_g1_i1					PF18717.1; PF15119.6	6087_0:004723	693056at2759	Predicted protein
TRINITY_DN3691_c0_g1_i1	sp|Q3T071|TMA16_BOVIN	Q3T071	GO:0005634	Translation machinery-associated protein 16 OS=Bos taurus OX=9913 GN=TMA16 PE=2 SV=1	PF11176.8; PF12066.8; PF17804.1	29159_0:000c13	10964at6447	translation machinery-associated protein 16-like
TRINITY_DN36989_c0_g3_i1					PF15565.6	6565_0:002fe1	1905141at2759	uncharacterized protein LOC105334428
TRINITY_DN37072_c0_g1_i1	sp|O15182|CETN3_HUMAN	O15182	GO:0005814; GO:0005509; GO:0005815; GO:0005737; GO:0015031; GO:0070390; GO:0008017; GO:0005813; GO:0044615; GO:0005515; GO:0005634; GO:0007098; GO:0007049	Centrin-3 OS=Homo sapiens OX=9606 GN=CETN3 PE=1 SV=2	PF13624.6; PF12763.7; PF00404.18; PF03448.17; PF05042.13; PF17959.1; PF13405.6; PF14658.6; PF13499.6; PF14493.6; PF18213.1; PF13202.6; PF10591.9; PF13833.6; PF00036.32	29159_0:002e0b	1340191at2759	EF-hand domain
TRINITY_DN37228_c0_g1_i1	sp|A2BD92|TM11A_XENLA	A2BD92	GO:0005743; GO:0016021; GO:0007005; GO:0016020; GO:0005739; GO:0031305	Transmembrane protein 11-A, mitochondrial OS=Xenopus laevis OX=8355 GN=tmem11-a PE=2 SV=1	PF14972.6	10224_0:000d48	1222072at2759	Transmembrane protein 11
TRINITY_DN3741_c1_g1_i1						37653_0:002147	1268544at2759	Reverse transcriptase
TRINITY_DN3759_c0_g1_i13					PF01609.21; PF13586.6; PF13359.6	6565_0:0067cf	1023757at2759	Restriction endonuclease type II-like
TRINITY_DN37651_c2_g1_i1						29159_0:002bf7	1365966at2759	three-prime repair exonuclease 1
TRINITY_DN37763_c0_g1_i1	sp|Q9Y3U8|RL36_HUMAN	Q9Y3U8	GO:0006364; GO:0006413; GO:0003735; GO:0005737; GO:0006614; GO:0002181; GO:0000184; GO:0022625; GO:0005829; GO:0005840; GO:0006412; GO:0042788	60S ribosomal protein L36 OS=Homo sapiens OX=9606 GN=RPL36 PE=1 SV=3	PF01158.18	6500_0:0013a2	10828at6447	60S ribosomal protein L36-like	R-HSA-156827; R-HSA-156902; R-HSA-1799339; R-HSA-1799339; R-HSA-192823; R-HSA-2408557; R-HSA-6791226; R-HSA-72689; R-HSA-72706; R-HSA-72764; R-HSA-9010553; R-HSA-975956; R-HSA-975957	L13a-mediated translational silencing of Ceruloplasmin expression; Peptide chain elongation; SRP-dependent cotranslational protein targeting to membrane; SRP-dependent cotranslational protein targeting to membrane; Viral mRNA Translation; Selenocysteine synthesis; Major pathway of rRNA processing in the nucleolus and cytosol; Formation of a pool of free 40S subunits; GTP hydrolysis and joining of…
TRINITY_DN3821_c0_g1_i1					PF17352.2
TRINITY_DN3826_c0_g1_i4	sp|A6QQL5|CB073_BOVIN	A6QQL5		Uncharacterized protein C2orf73 homolog OS=Bos taurus OX=9913 PE=2 SV=1	PF12578.8; PF15667.5	6573_0:00576a	1586889at2759	uncharacterized protein C2orf73 homolog
TRINITY_DN383_c0_g2_i1	sp|Q6PBK3|RS28_DANRE	Q6PBK3	GO:0042788; GO:0005791; GO:0003735; GO:0022627; GO:0005783; GO:0005737; GO:0002181; GO:0098556; GO:0005829; GO:0030490; GO:0005840; GO:0006412; GO:0000028	40S ribosomal protein S28 OS=Danio rerio OX=7955 GN=rps28 PE=3 SV=1		29159_0:005822	12238at1206795	V3Z9L2_LOTGI	R-DRE-1799339; R-DRE-72695; R-DRE-72702; R-DRE-72706; R-DRE-975956; R-DRE-975957	SRP-dependent cotranslational protein targeting to membrane; Formation of the ternary complex, and subsequently, the 43S complex; Ribosomal scanning and start codon recognition; GTP hydrolysis and joining of the 60S ribosomal subunit; Nonsense Mediated Decay (NMD) independent of the Exon Junction Complex (EJC); Nonsense Mediated Decay (NMD) enhanced by the Exon Junction Complex (EJC)
TRINITY_DN3872_c0_g1_i12	sp|P61289|PSME3_HUMAN	P61289	GO:0097371; GO:0000165; GO:0061136; GO:0005654; GO:0016032; GO:0005737; GO:0010950; GO:0006915; GO:0002039; GO:0000502; GO:0043161; GO:0031145; GO:0005634; GO:0008537; GO:0010972; GO:2000045; GO:0007049; GO:0061133	Proteasome activator complex subunit 3 OS=Homo sapiens OX=9606 GN=PSME3 PE=1 SV=1	PF02251.18; PF07579.11; PF16923.5; PF02252.18	6565_0:0075ce	1251022at2759	proteasome activator complex subunit 3	R-HSA-1169091; R-HSA-1234176; R-HSA-1236974; R-HSA-1236978; R-HSA-174084; R-HSA-174113; R-HSA-174154; R-HSA-174178; R-HSA-174184; R-HSA-180534; R-HSA-180585; R-HSA-187577; R-HSA-195253; R-HSA-202424; R-HSA-211733; R-HSA-2467813; R-HSA-2871837; R-HSA-349425; R-HSA-350562; R-HSA-382556; R-HSA-450408; R-HSA-4608870; R-HSA-4641257; R-HSA-4641258; R-HSA-5358346; R-HSA-5362768; R-HSA-5607761; R-HSA-560…	Activation of NF-kappaB in B cells; Oxygen-dependent proline hydroxylation of Hypoxia-inducible Factor Alpha; ER-Phagosome pathway; Cross-presentation of soluble exogenous antigens (endosomes); Autodegradation of Cdh1 by Cdh1:APC/C; SCF-beta-TrCP mediated degradation of Emi1; APC/C:Cdc20 mediated degradation of Securin; APC/C:Cdh1 mediated degradation of Cdc20 and other APC/C:Cdh1 targeted protei…
TRINITY_DN38839_c0_g1_i2	sp|H3BMG3|SMKR1_HUMAN	H3BMG3		Small lysine-rich protein 1 OS=Homo sapiens OX=9606 GN=SMKR1 PE=4 SV=1		56723_0:0022a1	136341at7898	small lysine-rich protein 1
TRINITY_DN3889_c0_g2_i1					PF03208.19
TRINITY_DN38949_c0_g1_i1					PF02935.16
TRINITY_DN3898_c0_g1_i2	sp|Q8WW12|PCNP_HUMAN	Q8WW12	GO:0005654; GO:0016567; GO:0043161; GO:0005515; GO:0005634; GO:0016604; GO:0007049	PEST proteolytic signal-containing nuclear protein OS=Homo sapiens OX=9606 GN=PCNP PE=1 SV=2	PF15473.6	6573_0:002036	11690at6447	PEST proteolytic signal-containing nuclear protein-like
TRINITY_DN39099_c1_g1_i1					PF11053.8	29159_0:004c40	13440at6447	uncharacterized protein LOC105346887
TRINITY_DN3922_c0_g2_i1						6565_0:0020a6	141180at33208	Serine/threonine kinase like domain containing 1
TRINITY_DN39311_c0_g1_i2					PF03513.14
TRINITY_DN3950_c0_g1_i1					PF03352.13
TRINITY_DN4003_c0_g2_i1	sp|Q58DW3|RL29_BOVIN	Q58DW3	GO:0002181; GO:0005840; GO:0022625; GO:0006412; GO:0003735	60S ribosomal protein L29 OS=Bos taurus OX=9913 GN=RPL29 PE=2 SV=3		6183_0:001394	1608986at2759	60S ribosomal protein L29	R-BTA-156827; R-BTA-1799339; R-BTA-6791226; R-BTA-72689; R-BTA-72706; R-BTA-975956; R-BTA-975957	L13a-mediated translational silencing of Ceruloplasmin expression; SRP-dependent cotranslational protein targeting to membrane; Major pathway of rRNA processing in the nucleolus and cytosol; Formation of a pool of free 40S subunits; GTP hydrolysis and joining of the 60S ribosomal subunit; Nonsense Mediated Decay (NMD) independent of the Exon Junction Complex (EJC); Nonsense Mediated Decay (NMD) e…
TRINITY_DN4004_c0_g1_i1	sp|Q2KII4|ELOC_BOVIN	Q2KII4	GO:0006511; GO:0005634	Elongin-C OS=Bos taurus OX=9913 GN=ELOC PE=3 SV=1	PF06130.12; PF03931.15	29159_0:0035ff	1538795at2759	transcription elongation factor B polypeptide 1	R-BTA-112382; R-BTA-1234176; R-BTA-674695; R-BTA-6796648; R-BTA-75955; R-BTA-8951664; R-BTA-983168	Formation of RNA Pol II elongation complex ; Oxygen-dependent proline hydroxylation of Hypoxia-inducible Factor Alpha; RNA Polymerase II Pre-transcription Events; TP53 Regulates Transcription of DNA Repair Genes; RNA Polymerase II Transcription Elongation; Neddylation; Antigen processing: Ubiquitination & Proteasome degradation
TRINITY_DN40240_c0_g1_i2						6573_0:001f4d	11136at6447	uncharacterized protein C6orf163 homolog
TRINITY_DN4078_c0_g1_i2					PF06152.11	6565_0:00735e	1905141at2759	uncharacterized protein LOC105334428
TRINITY_DN4085_c0_g1_i2	sp|Q4KLM5|ABT1_RAT	Q4KLM5	GO:0034462; GO:0000480; GO:0003677; GO:0000447; GO:0003676; GO:0021522; GO:0003723; GO:0005634; GO:0005667; GO:0000472; GO:0006357; GO:0005730	Activator of basal transcription 1 OS=Rattus norvegicus OX=10116 GN=Abt1 PE=1 SV=1	PF08911.11; PF00076.22	6565_0:000a68	10710at6447	activator of basal transcription 1-like
TRINITY_DN4090_c0_g3_i1						6573_0:002348	1301427at2759	uncharacterized protein LOC106167402
TRINITY_DN40910_c0_g1_i1	sp|Q5PRB3|PIHD2_DANRE	Q5PRB3	GO:0006364; GO:1990904; GO:0005737; GO:0097255; GO:0000492; GO:0070286; GO:0003674	PIH1 domain-containing protein 2 OS=Danio rerio OX=7955 GN=pih1d2 PE=2 SV=1	PF08190.12; PF17886.1; PF18201.1; PF12238.8; PF00011.21; PF09829.9	6500_0:0040d0	1394603at2759	PIH1 domain-containing protein 2
TRINITY_DN41100_c0_g2_i1	sp|Q3ZBR6|SEM1_BOVIN	Q3ZBR6	GO:0000724; GO:0008541; GO:0006406; GO:0043248; GO:0000502	26S proteasome complex subunit SEM1 OS=Bos taurus OX=9913 GN=SEM1 PE=3 SV=1		6565_0:0005e5
TRINITY_DN41296_c0_g1_i1					PF00760.18
TRINITY_DN4137_c0_g1_i2					PF11669.8; PF04257.14; PF14575.6; PF05751.11; PF01741.18; PF14851.6; PF11857.8; PF02535.22
TRINITY_DN4149_c0_g3_i1					PF08597.10; PF09747.9; PF10500.9; PF05764.13
TRINITY_DN416_c0_g1_i7					PF16240.5
TRINITY_DN41670_c0_g1_i1						597456_0:0025e1	11113at34735	LOW QUALITY PROTEIN: uncharacterized protein LOC108577999
TRINITY_DN41670_c0_g2_i1						1049336_0:00453e	156745at50557	uncharacterized protein LOC107227685
TRINITY_DN41720_c0_g1_i1	sp|B6LI37|U722_BRAFL	B6LI37	GO:0060271	UPF0722 protein OS=Branchiostoma floridae OX=7739 GN=BRAFLDRAFT_119565 PE=3 SV=1	PF17664.1; PF08497.10	6573_0:001e5f	11816at6447	UPF0722 protein C11orf88 homolog
TRINITY_DN4173_c0_g1_i1	sp|Q5E9K0|PSB2_BOVIN	Q5E9K0	GO:0004298; GO:0004175; GO:0051603; GO:0005654; GO:0005737; GO:0000502; GO:0043161; GO:0010499; GO:0005634; GO:0005839; GO:0019774	Proteasome subunit beta type-2 OS=Bos taurus OX=9913 GN=PSMB2 PE=1 SV=1	PF00227.26; PF18846.1	7574_0:0063fe	1392180at2759	Proteasome subunit beta type	R-BTA-174084; R-BTA-5689603; R-BTA-68827	Autodegradation of Cdh1 by Cdh1:APC/C; UCH proteinases; CDT1 association with the CDC6:ORC:origin complex
TRINITY_DN42080_c0_g1_i1	sp|Q9VY28|RT25_DROME	Q9VY28	GO:0003735; GO:0005763; GO:0032543; GO:0005515; GO:0005739; GO:0005840	Probable 28S ribosomal protein S25, mitochondrial OS=Drosophila melanogaster OX=7227 GN=mRpS25 PE=1 SV=1	PF05047.16	37653_0:000654	10168at6447	probable 28S ribosomal protein S25, mitochondrial	R-DME-5389840; R-DME-5419276	Mitochondrial translation elongation; Mitochondrial translation termination
TRINITY_DN42124_c0_g2_i2	sp|P08991|H2AV_STRPU	P08991	GO:0000786; GO:0005694; GO:0003677; GO:0006342; GO:0005634; GO:0046982	Histone H2A.V (Fragment) OS=Strongylocentrotus purpuratus OX=7668 GN=H2A.F/Z PE=1 SV=1		121845_0:00070b	138214at50557	Histone H2A
TRINITY_DN42301_c0_g1_i3					PF15168.6; PF10654.9
TRINITY_DN42408_c0_g1_i1						6573_0:004b39	200714at33208	Zona pellucida domain
TRINITY_DN4257_c0_g1_i4					PF02868.15; PF09156.10
TRINITY_DN4276_c0_g2_i1					PF13676.6; PF01582.20	29159_0:0042ba	11680at6447	uncharacterized protein LOC105343734
TRINITY_DN4305_c2_g2_i1	sp|O00142|KITM_HUMAN	O00142	GO:0000166; GO:0005524; GO:0005737; GO:0019136; GO:0004797; GO:0005759; GO:0016740; GO:0006139; GO:0016310; GO:0071897; GO:0043097; GO:0005739; GO:0009157; GO:0016301	Thymidine kinase 2, mitochondrial OS=Homo sapiens OX=9606 GN=TK2 PE=1 SV=4	PF13401.6; PF13191.6; PF00005.27; PF13671.6; PF02223.17; PF01712.19; PF02367.17; PF13207.6; PF13238.6; PF05729.12; PF01935.17; PF01121.20; PF13521.6; PF07693.14	6573_0:002c6a	1505356at2759	deoxycytidine kinase	R-HSA-73614	Pyrimidine salvage
TRINITY_DN4318_c0_g1_i2	sp|Q07001|ACHD_HUMAN	Q07001	GO:0005892; GO:0048630; GO:0045211; GO:0042166; GO:0006812; GO:0007165; GO:0042391; GO:0099060; GO:0022848; GO:0016021; GO:0005886; GO:0015276; GO:0045202; GO:0006811; GO:0016020; GO:0003009; GO:0031594; GO:0006936	Acetylcholine receptor subunit delta OS=Homo sapiens OX=9606 GN=CHRND PE=1 SV=1	PF02931.23; PF02932.16; PF09798.9	29159_0:000709	13963at6447	Neurotransmitter-gated ion-channel	R-HSA-629587	Highly sodium permeable acetylcholine nicotinic receptors
TRINITY_DN43630_c0_g1_i1	sp|Q9NSI2|F207A_HUMAN	Q9NSI2	GO:0030688; GO:0000462; GO:0005515; GO:0005730; GO:0030686	Protein FAM207A OS=Homo sapiens OX=9606 GN=FAM207A PE=1 SV=2	PF15341.6	6573_0:0056d5	11313at6447	A0A0L8IG69_OCTBM
TRINITY_DN43671_c0_g3_i2						29159_0:004d3c	11418at6447	uncharacterized protein LOC110447519 isoform X1
TRINITY_DN4403_c0_g1_i1						7739_0:003169	1283825at2759	serine protease inhibitor Kazal-type 5
TRINITY_DN4416_c1_g1_i1	sp|Q2M2U4|RNH2C_BOVIN	Q2M2U4	GO:0006401; GO:0032299; GO:0005634	Ribonuclease H2 subunit C OS=Bos taurus OX=9913 GN=RNASEH2C PE=2 SV=1	PF08615.11	6573_0:004c79	11240at6447	ribonuclease H2 subunit C-like
TRINITY_DN4418_c0_g1_i3	sp|O60041|CALM_KLULA	O60041	GO:0005737; GO:0043332; GO:1903525; GO:0000742; GO:0045160; GO:0005938; GO:0005509; GO:0006898; GO:0005934; GO:0005823; GO:0032120; GO:0051019; GO:0042144; GO:0048306; GO:0006606; GO:0006661; GO:0007010; GO:0000131; GO:0007114; GO:0016237; GO:0005935; GO:0006897; GO:0005628; GO:0051300	Calmodulin OS=Kluyveromyces lactis (strain ATCC 8585 / CBS 2359 / DSM 70799 / NBRC 1267 / NRRL Y-1140 / WM37) OX=284590 GN=CMD1 PE=1 SV=1	PF12763.7; PF08976.11; PF18173.1; PF13405.6; PF13499.6; PF14788.6; PF10025.9; PF18864.1; PF13202.6; PF13833.6; PF00036.32	29159_0:005c88	1751388at2759	calmodulin-beta-like
TRINITY_DN4477_c1_g1_i3	sp|C3Z724|UBE2S_BRAFL	C3Z724	GO:0006511; GO:0000166; GO:1904668; GO:0010994; GO:0007049; GO:0005524; GO:0004842; GO:0005680; GO:0016567; GO:0070979; GO:0016740; GO:0031145; GO:0005634; GO:0051301; GO:0000209; GO:0061631; GO:0010458	Ubiquitin-conjugating enzyme E2 S OS=Branchiostoma floridae OX=7739 GN=BRAFLDRAFT_259979 PE=3 SV=1	PF00179.26	6565_0:001099	1412570at2759	ubiquitin-conjugating enzyme E2 S
TRINITY_DN44863_c0_g1_i1					PF12180.8
TRINITY_DN45131_c0_g3_i2	sp|P00126|QCR6_BOVIN	P00126	GO:0070469; GO:0006122; GO:0005743; GO:0009060; GO:0008121; GO:0016020; GO:0005739; GO:0005750	Cytochrome b-c1 complex subunit 6, mitochondrial OS=Bos taurus OX=9913 GN=UQCRH PE=1 SV=2	PF02320.16	610380_0:002719	13335at36668	Cytochrome b-c1 complex subunit 6
TRINITY_DN45148_c0_g2_i2						7029_0:0049fb	126839at50557	Transposable element tc3 transposase
TRINITY_DN45184_c0_g1_i7	sp|P0CU66|OST4_CANLF	P0CU66	GO:0008250; GO:0005783; GO:0005789; GO:0016021; GO:0018279; GO:0016020; GO:0006486	Dolichyl-diphosphooligosaccharide--protein glycosyltransferase subunit 4 OS=Canis lupus familiaris OX=9615 GN=OST4 PE=1 SV=1		8355_0:0079bc	1644285at2759	Oligosaccharyltransferase complex subunit 4, non-catalytic
TRINITY_DN453_c0_g1_i12	sp|Q8NEA4|FBX36_HUMAN	Q8NEA4		F-box only protein 36 OS=Homo sapiens OX=9606 GN=FBXO36 PE=2 SV=2	PF00646.33; PF15966.5; PF12937.7	6565_0:00401d	1245866at2759	F-box only protein 36
TRINITY_DN45339_c0_g1_i2	sp|Q9D6H2|IFT25_MOUSE	Q9D6H2	GO:0001501; GO:0007283; GO:0042073; GO:0042995; GO:0030992; GO:0007224; GO:0030154; GO:0015031; GO:0005813; GO:0005515; GO:0046872; GO:0007507; GO:0005929; GO:0001822; GO:0060271	Intraflagellar transport protein 25 homolog OS=Mus musculus OX=10090 GN=Hspb11 PE=1 SV=2		8083_0:002cea	126860at7898	intraflagellar transport protein 25 homolog	R-MMU-5620924	Intraflagellar transport
TRINITY_DN45460_c0_g1_i2					PF03921.14; PF16370.5; PF12204.8
TRINITY_DN4572_c0_g1_i6						29159_0:002ecc	1553369at2759	Transposable element Tc1 transposase
TRINITY_DN45762_c0_g1_i1	sp|Q9FVX1|GRXC3_ARATH	Q9FVX1	GO:0098869; GO:0015035; GO:0005737; GO:0000137; GO:0004362; GO:0005794; GO:0034599	Glutaredoxin-C3 OS=Arabidopsis thaliana OX=3702 GN=GRXC3 PE=2 SV=1	PF00462.24	6573_0:004fe3	11338at6447	Glutaredoxin-1
TRINITY_DN46057_c0_g1_i1	sp|Q9D273|MMAB_MOUSE	Q9D273	GO:0000166; GO:0005524; GO:0008817; GO:0016740; GO:0031419; GO:0005739; GO:0009235	Corrinoid adenosyltransferase OS=Mus musculus OX=10090 GN=Mmab PE=1 SV=1	PF01923.18	6500_0:0046fb	466706at33208	Methylmalonic aciduria (cobalamin deficiency) cblB type	R-MMU-196741	Cobalamin (Cbl, vitamin B12) transport and metabolism
TRINITY_DN46165_c0_g2_i1	sp|A7RP64|PNO1_NEMVE	A7RP64	GO:0003676; GO:0003723; GO:0005730; GO:0005634	RNA-binding protein pno1 OS=Nematostella vectensis OX=45351 GN=pno1 PE=3 SV=1		10228_0:000b15	1269649at2759	K Homology domain
TRINITY_DN46982_c0_g2_i1	sp|Q7ZUG0|RUXE_DANRE	Q7ZUG0	GO:0005681; GO:0005687; GO:0071011; GO:0005685; GO:0046540; GO:0008380; GO:0034715; GO:0071007; GO:0003723; GO:0034719; GO:0005686; GO:0071005; GO:0000387; GO:0005829; GO:0000398; GO:0005634; GO:0006397; GO:0005682; GO:0034709	Small nuclear ribonucleoprotein E OS=Danio rerio OX=7955 GN=snrpe PE=3 SV=1		6573_0:001b20	10124at6447	small nuclear ribonucleoprotein E	R-DRE-191859; R-DRE-72163; R-DRE-72165	snRNP Assembly; mRNA Splicing - Major Pathway; mRNA Splicing - Minor Pathway
TRINITY_DN47037_c0_g1_i1						6565_0:00026a	1060061at2759	Core 1 udp-galactose
TRINITY_DN47039_c0_g1_i1	sp|Q7F0J0|CML13_ORYSJ	Q7F0J0	GO:0005509; GO:0000278; GO:0046872; GO:0005814	Probable calcium-binding protein CML13 OS=Oryza sativa subsp. japonica OX=39947 GN=CML13 PE=2 SV=1	PF12763.7; PF05577.12; PF13405.6; PF14658.6; PF13499.6; PF13202.6; PF13833.6; PF00036.32	6573_0:004500	1340191at2759	EF-hand domain
TRINITY_DN4705_c0_g1_i5	sp|A4IFD0|KAD5_BOVIN	A4IFD0	GO:0046034; GO:0016301; GO:0000166; GO:0005524; GO:0046940; GO:0005737; GO:0004017; GO:0009142; GO:0006139; GO:0016740; GO:0016310; GO:0006165; GO:0005829; GO:0019205; GO:0004550	Adenylate kinase isoenzyme 5 OS=Bos taurus OX=9913 GN=Ak5 PE=2 SV=1	PF10873.8	225164_0:00411f	11727at6447	uncharacterized protein LOC106080272	R-BTA-499943	Interconversion of nucleotide di- and triphosphates
TRINITY_DN4734_c0_g2_i1	sp|Q9PTW9|PSA7_CARAU	Q9PTW9	GO:0006511; GO:0051603; GO:0005737; GO:0000502; GO:0005634; GO:0005839; GO:0019773	Proteasome subunit alpha type-7 OS=Carassius auratus OX=7957 GN=psma7 PE=2 SV=1	PF10584.9; PF00227.26	29159_0:0013be	1222564at2759	Proteasome subunit alpha type
TRINITY_DN4752_c0_g1_i3	sp|Q6GLJ1|BTBDH_XENLA	Q6GLJ1	GO:0005576	BTB/POZ domain-containing protein 17 OS=Xenopus laevis OX=8355 GN=btbd17 PE=2 SV=2	PF07707.15; PF00651.31	29159_0:0058fb	1174057at2759	BTB/POZ domain-containing protein 17
TRINITY_DN4757_c0_g1_i2	sp|P21108|PRPS3_HUMAN	P21108	GO:0002189; GO:0009165; GO:0000166; GO:0006164; GO:0044249; GO:0004749; GO:0042803; GO:0005524; GO:0000287; GO:0005737; GO:0009156; GO:0016740; GO:0008584; GO:0016310; GO:0046872; GO:0006015; GO:0009116; GO:0016301	Ribose-phosphate pyrophosphokinase 3 OS=Homo sapiens OX=9606 GN=PRPS1L1 PE=1 SV=2		6945_0:001ebb	1043963at2759	Ribose-phosphate pyrophosphokinase	R-HSA-73843	5-Phosphoribose 1-diphosphate biosynthesis
TRINITY_DN47607_c0_g1_i2	sp|Q9CQ46|DRC8_MOUSE	Q9CQ46	GO:0097228; GO:0005856; GO:0008150; GO:0005509; GO:0042995; GO:0005737; GO:0031514; GO:0005929	Dynein regulatory complex protein 8 OS=Mus musculus OX=10090 GN=Efcab2 PE=1 SV=1	PF08726.10; PF08976.11; PF14658.6; PF13405.6; PF13499.6; PF13202.6; PF05066.13; PF13833.6; PF00036.32	6526_0:001209	1096220at2759	EF-hand calcium-binding domain-containing protein 2
TRINITY_DN47848_c0_g1_i1	sp|Q567Y6|IFT22_DANRE	Q567Y6	GO:0000166; GO:0030992; GO:0006886; GO:0003924; GO:0012505; GO:0005525	Intraflagellar transport protein 22 homolog OS=Danio rerio OX=7955 GN=ift22 PE=2 SV=1	PF08477.13; PF01926.23; PF13238.6; PF00071.22; PF04670.12; PF00503.20; PF00025.21	29159_0:0043e1	1428809at2759	Intraflagellar transport 22	R-DRE-5620924	Intraflagellar transport
TRINITY_DN48842_c0_g1_i3	sp|O14045|TPT1_SCHPO	O14045	GO:0106035; GO:0006388; GO:0016740; GO:0005634; GO:0000215; GO:0003950; GO:0008033	Putative tRNA 2'-phosphotransferase OS=Schizosaccharomyces pombe (strain 972 / ATCC 24843) OX=284812 GN=SPAC2C4.12c PE=3 SV=2	PF01885.16	7719_0:002a2d	1460780at2759	tRNA 2'-phosphotransferase 1
TRINITY_DN4889_c0_g1_i5					PF09177.11; PF04774.15; PF07558.11; PF18071.1; PF15397.6; PF01920.20	6573_0:002426	1168106at2759	uncharacterized protein C20orf96 homolog
TRINITY_DN4895_c0_g5_i1	sp|Q95WA0|RL26_LITLI	Q95WA0	GO:0003735; GO:0015934; GO:0005840; GO:0006412; GO:0003723	60S ribosomal protein L26 OS=Littorina littorea OX=31216 GN=RPL26 PE=2 SV=1		7574_0:0009af	1488916at2759	ribosomal protein L24
TRINITY_DN49_c0_g4_i1	sp|Q5ZI57|TPPC3_CHICK	Q5ZI57	GO:0006888; GO:0006891; GO:0016192; GO:0005783; GO:0033106; GO:0048193; GO:0030008; GO:0005794; GO:0005829	Trafficking protein particle complex subunit 3 OS=Gallus gallus OX=9031 GN=TRAPPC3 PE=2 SV=1	PF04051.16	225164_0:005409	1334804at2759	Trafficking protein particle complex subunit	R-GGA-204005	COPII-mediated vesicle transport
TRINITY_DN491_c0_g1_i1					PF17064.5
TRINITY_DN4914_c0_g2_i1					PF08576.10; PF16118.5
TRINITY_DN4920_c0_g2_i2	sp|Q5ZJ24|FOPNL_CHICK	Q5ZJ24	GO:0034451; GO:0036064; GO:0005856; GO:0005815; GO:0042995; GO:0034453; GO:0005737; GO:0031514; GO:0005813; GO:0030030; GO:0005929; GO:0060271	LisH domain-containing protein FOPNL OS=Gallus gallus OX=9031 GN=FOPNL PE=2 SV=1	PF09398.10; PF09747.9; PF08513.11; PF16045.5	29159_0:006e2a	10238at1206795	lisH domain-containing protein FOPNL-like
TRINITY_DN494_c0_g2_i1	sp|P25867|UBCD1_DROME	P25867	GO:0000278; GO:0045676; GO:0006511; GO:0000166; GO:0016322; GO:0097039; GO:0051321; GO:0005524; GO:0016567; GO:0030718; GO:0031625; GO:0016740; GO:0051301; GO:0005634; GO:0001751; GO:0000209; GO:0061631; GO:0007140; GO:0007049	Ubiquitin-conjugating enzyme E2-17 kDa OS=Drosophila melanogaster OX=7227 GN=eff PE=2 SV=1	PF05773.22; PF14461.6; PF05743.13; PF00179.26	70779_0:000861	1337945at2759	Ubiquitin-conjugating enzyme E2	R-DME-1234176; R-DME-141430; R-DME-174048; R-DME-174084; R-DME-174154; R-DME-174178; R-DME-174184; R-DME-176407; R-DME-176408; R-DME-176409; R-DME-176412; R-DME-179409; R-DME-209360; R-DME-209461; R-DME-2173795; R-DME-2467813; R-DME-2559582; R-DME-5689896; R-DME-69017; R-DME-8866652; R-DME-8866654; R-DME-8951664; R-DME-9033241; R-DME-983168	Oxygen-dependent proline hydroxylation of Hypoxia-inducible Factor Alpha; Inactivation of APC/C via direct inhibition of the APC/C complex; APC/C:Cdc20 mediated degradation of Cyclin B; Autodegradation of Cdh1 by Cdh1:APC/C; APC/C:Cdc20 mediated degradation of Securin; APC/C:Cdh1 mediated degradation of Cdc20 and other APC/C:Cdh1 targeted proteins in late mitosis/early G1; Cdc20:Phospho-APC/C med…
TRINITY_DN49468_c0_g1_i1	sp|Q6CQE5|TAR1_KLULA	Q6CQE5	GO:0005739	Protein TAR1 OS=Kluyveromyces lactis (strain ATCC 8585 / CBS 2359 / DSM 70799 / NBRC 1267 / NRRL Y-1140 / WM37) OX=284590 GN=TAR1-A PE=4 SV=2	PF12219.8	35525_0:003296	1290964at2759	A0A2I2FQR3_9EURO
TRINITY_DN499_c1_g2_i12	sp|Q8ND07|BBOF1_HUMAN	Q8ND07	GO:0036064; GO:0005856; GO:0042995; GO:0005737; GO:0044458; GO:0005929	Basal body-orientation factor 1 OS=Homo sapiens OX=9606 GN=BBOF1 PE=2 SV=3	PF05335.13; PF14988.6; PF06812.12; PF04746.12; PF08317.11; PF01391.18	6573_0:003e84	400824at33208	basal body-orientation factor 1
TRINITY_DN5044_c0_g2_i2	sp|P42519|STAR_DROME	P42519	GO:0030176; GO:0006888; GO:0097038; GO:0048263; GO:0005783; GO:0007275; GO:0046843; GO:0050714; GO:0016021; GO:0005886; GO:0016318; GO:0005794; GO:0031902; GO:0016020; GO:0038004; GO:0042749	Protein Star OS=Drosophila melanogaster OX=7227 GN=S PE=2 SV=1	PF05050.12	6832_0:0025c3	127702at6656	Protein Star
TRINITY_DN5056_c0_g1_i1	sp|Q5PPV3|MORN3_XENLA	Q5PPV3		MORN repeat-containing protein 3 OS=Xenopus laevis OX=8355 GN=morn3 PE=2 SV=1	PF17479.2; PF02493.20	7574_0:000ca4	1309439at2759	MORN repeat-containing protein 3
TRINITY_DN5061_c0_g1_i1	sp|Q05A80|CAPR2_MOUSE	Q05A80	GO:0032092; GO:0017148; GO:0090263; GO:0005654; GO:0005737; GO:0005739; GO:0030308; GO:0003723; GO:0030154; GO:0005102; GO:0005813; GO:0005886; GO:0046872; GO:0005829; GO:0045944; GO:0016020; GO:0040008; GO:0043235; GO:0033138	Caprin-2 OS=Mus musculus OX=10090 GN=Caprin2 PE=1 SV=1	PF00386.21; PF17951.1; PF04375.14; PF05094.12	6565_0:000359	1258047at2759	otolin-1
TRINITY_DN50617_c1_g1_i2	sp|Q9UGP8|SEC63_HUMAN	Q9UGP8	GO:0038023; GO:0008320; GO:0006612; GO:0005783; GO:0006614; GO:0005789; GO:0006807; GO:0003723; GO:0031204; GO:0015031; GO:0016021; GO:0031207; GO:0001889; GO:0005515; GO:0016020; GO:0010259; GO:0006620	Translocation protein SEC63 homolog OS=Homo sapiens OX=9606 GN=SEC63 PE=1 SV=2		6500_0:001c6d	176261at33208	translocation protein SEC63 homolog
TRINITY_DN5069_c0_g1_i1	sp|P55954|COX5A_CAEEL	P55954	GO:0005751; GO:0005743; GO:0006119; GO:0006123; GO:0004129; GO:0046872; GO:1902600; GO:0016020; GO:0005739	Cytochrome c oxidase subunit 5A, mitochondrial OS=Caenorhabditis elegans OX=6239 GN=cox-5A PE=1 SV=2	PF02284.16	37621_0:0016c6	1286549at2759	cytochrome c oxidase subunit 5A, mitochondrial
TRINITY_DN507_c4_g1_i5						6565_0:002186	11923at6447	uncharacterized protein LOC105321897
TRINITY_DN5075_c0_g1_i3	sp|A7SMR0|MEIG1_NEMVE	A7SMR0	GO:0005634	Meiosis expressed gene 1 protein homolog OS=Nematostella vectensis OX=45351 GN=v1g237368 PE=3 SV=1		29159_0:000b8e	10796at6447	meiosis expressed gene 1 protein homolog
TRINITY_DN5107_c0_g1_i1	sp|Q9VXX8|RL371_DROME	Q9VXX8	GO:0003735; GO:0019843; GO:0003723; GO:0002181; GO:0022625; GO:0046872; GO:0005840; GO:0006412	Probable 60S ribosomal protein L37-A OS=Drosophila melanogaster OX=7227 GN=RpL37a PE=1 SV=1		6565_0:001196	11188at6447	Ribosomal protein L37	R-DME-156827; R-DME-1799339; R-DME-72689; R-DME-72706; R-DME-975956; R-DME-975957	L13a-mediated translational silencing of Ceruloplasmin expression; SRP-dependent cotranslational protein targeting to membrane; Formation of a pool of free 40S subunits; GTP hydrolysis and joining of the 60S ribosomal subunit; Nonsense Mediated Decay (NMD) independent of the Exon Junction Complex (EJC); Nonsense Mediated Decay (NMD) enhanced by the Exon Junction Complex (EJC)
TRINITY_DN51482_c0_g1_i8						597456_0:002650	10341at34735	ATP synthase subunit epsilon, mitochondrial-like isoform X1
TRINITY_DN52321_c0_g1_i1					PF10454.9
TRINITY_DN52459_c0_g1_i2						29159_0:004041	4413at6447	Reductase-related protein
TRINITY_DN5316_c0_g1_i1	sp|A6NNX1|RIAD1_HUMAN	A6NNX1		RIIa domain-containing protein 1 OS=Homo sapiens OX=9606 GN=RIIAD1 PE=4 SV=1	PF02197.17	29159_0:0046f2	10533at6447	RIIa domain-containing protein 1-like
TRINITY_DN53183_c0_g1_i1					PF01166.18
TRINITY_DN5326_c0_g1_i5					PF00001.21	70779_0:000715	1825005at2759	uncharacterized protein LOC107353520
TRINITY_DN5330_c1_g1_i1					PF03638.15	45351_0:0039dc	223127at33208	Predicted protein
TRINITY_DN5339_c0_g2_i1						6565_0:00379a	11974at6447	uncharacterized protein LOC111128993
TRINITY_DN53432_c0_g1_i3						34740_0:000855	115387at33392	Transposable element tc3 transposase
TRINITY_DN5382_c0_g1_i2	sp|P48556|PSMD8_HUMAN	P48556	GO:0055085; GO:0000165; GO:0016579; GO:0090263; GO:0006508; GO:0038061; GO:0022624; GO:0070498; GO:0043161; GO:0000502; GO:0006521; GO:0005515; GO:0031146; GO:0005829; GO:0005634; GO:0000209; GO:0010972; GO:0008541; GO:0031145; GO:0050852; GO:0005838	26S proteasome non-ATPase regulatory subunit 8 OS=Homo sapiens OX=9606 GN=PSMD8 PE=1 SV=2	PF03399.16; PF14538.6; PF10075.9	29159_0:004a9a	1183195at2759	26S proteasome non-ATPase regulatory subunit 8	R-HSA-1169091; R-HSA-1234176; R-HSA-1236974; R-HSA-1236978; R-HSA-174084; R-HSA-174113; R-HSA-174154; R-HSA-174178; R-HSA-174184; R-HSA-180534; R-HSA-180585; R-HSA-187577; R-HSA-195253; R-HSA-202424; R-HSA-211733; R-HSA-2467813; R-HSA-2871837; R-HSA-349425; R-HSA-350562; R-HSA-382556; R-HSA-450408; R-HSA-4608870; R-HSA-4641257; R-HSA-4641258; R-HSA-5358346; R-HSA-5362768; R-HSA-5607761; R-HSA-560…	Activation of NF-kappaB in B cells; Oxygen-dependent proline hydroxylation of Hypoxia-inducible Factor Alpha; ER-Phagosome pathway; Cross-presentation of soluble exogenous antigens (endosomes); Autodegradation of Cdh1 by Cdh1:APC/C; SCF-beta-TrCP mediated degradation of Emi1; APC/C:Cdc20 mediated degradation of Securin; APC/C:Cdh1 mediated degradation of Cdc20 and other APC/C:Cdh1 targeted protei…
TRINITY_DN5385_c0_g1_i3	sp|Q9R088|KITM_MOUSE	Q9R088	GO:0000166; GO:0005743; GO:0046104; GO:0009157; GO:0005524; GO:0032042; GO:0004797; GO:0016740; GO:0006264; GO:0016310; GO:0009262; GO:0071897; GO:0005739; GO:0004137; GO:0046092; GO:0016301	Thymidine kinase 2, mitochondrial OS=Mus musculus OX=10090 GN=Tk2 PE=1 SV=2	PF06414.12; PF13401.6; PF02223.17; PF01712.19; PF14465.6; PF13207.6; PF13238.6; PF01121.20; PF13521.6; PF13671.6; PF13555.6	6573_0:004137	1505356at2759	deoxycytidine kinase	R-MMU-73614	Pyrimidine salvage
TRINITY_DN53862_c0_g1_i7						7741_0:003476	1132041at2759	uncharacterized protein LOC105440843
TRINITY_DN5387_c0_g1_i1					PF07225.12	6526_0:00147f	11543at6447	uncharacterized protein LOC101850443
TRINITY_DN5392_c0_g1_i5	sp|P28662|BRI3_MOUSE	P28662	GO:0005765; GO:0048471; GO:0005737; GO:0005764; GO:0016021; GO:0042802; GO:0016020	Brain protein I3 OS=Mus musculus OX=10090 GN=Bri3 PE=2 SV=2		1218281_0:0003fa	133651at33392	brain protein I3	R-MMU-6798695	Neutrophil degranulation
TRINITY_DN53988_c0_g1_i6	sp|Q9NZG7|NINJ2_HUMAN	Q9NZG7	GO:0005887; GO:0007155; GO:0007158; GO:0016021; GO:0005515; GO:0007399; GO:0042246; GO:0016020	Ninjurin-2 OS=Homo sapiens OX=9606 GN=NINJ2 PE=1 SV=1	PF02203.15; PF04923.12	8010_0:003c52	132115at7898	ninjurin-1-like
TRINITY_DN54353_c0_g1_i1						225164_0:00585e
TRINITY_DN54353_c0_g2_i1					PF05087.12
TRINITY_DN5462_c0_g1_i4	sp|A8XZB0|ATIF2_CAEBR	A8XZB0	GO:0051117; GO:0032780; GO:0005739; GO:0042030; GO:0006783	ATPase inhibitor mai-2, mitochondrial OS=Caenorhabditis briggsae OX=6238 GN=mai-2 PE=3 SV=1	PF04568.12; PF15967.5; PF18373.1; PF16043.5	116153_0:0014f2	10008at41084	ATPase inhibitor, mitochondrial
TRINITY_DN5483_c0_g1_i2	sp|Q8R107|PRLD1_MOUSE	Q8R107	GO:0045580; GO:0070234; GO:2001140; GO:0015914; GO:0097035; GO:0006869; GO:0051881; GO:0010950; GO:0006915; GO:0005739; GO:0090201; GO:1901857; GO:1990050; GO:0010917; GO:0005758; GO:0043066; GO:0032991	PRELI domain-containing protein 1, mitochondrial OS=Mus musculus OX=10090 GN=Prelid1 PE=1 SV=1	PF18825.1; PF04707.14	6500_0:003510	10025at1206795	PRELI domain-containing protein 1, mitochondrial-like	R-MMU-6803204	TP53 Regulates Transcription of Genes Involved in Cytochrome C Release
TRINITY_DN5484_c0_g1_i1					PF12763.7; PF13405.6; PF13499.6; PF08279.12; PF13202.6; PF10591.9; PF13833.6; PF00036.32
TRINITY_DN5575_c0_g1_i10	sp|Q9NBX4|RTXE_DROME	Q9NBX4	GO:0016779; GO:0006313; GO:0016740; GO:0005575; GO:0003964; GO:0006278	Probable RNA-directed DNA polymerase from transposon X-element OS=Drosophila melanogaster OX=7227 GN=X-element\ORF2 PE=3 SV=1	PF00078.27; PF13966.6; PF12450.8	10224_0:00217a	338379at33208	craniofacial development protein 2-like
TRINITY_DN56009_c0_g3_i1	sp|P54213|CATR_DUNSA	P54213	GO:0005509; GO:0051301; GO:0046872; GO:0007049	Caltractin OS=Dunaliella salina OX=3046 PE=2 SV=1	PF12763.7; PF00404.18; PF09524.10; PF04963.13; PF09851.9; PF10591.9; PF14658.6; PF13155.6; PF01595.20; PF13833.6; PF05042.13; PF03448.17; PF17959.1; PF07564.11; PF05872.12; PF13405.6; PF08236.11; PF13499.6; PF09821.9; PF18213.1; PF13202.6; PF13624.6; PF03963.14; PF08976.11; PF13623.6; PF03672.13; PF11829.8; PF05099.13; PF00036.32	6500_0:0047a7	1382571at2759	EF-hand domain
TRINITY_DN5622_c0_g1_i1	sp|Q8IZU3|SYCP3_HUMAN	Q8IZU3	GO:0007141; GO:0005694; GO:0003677; GO:0007286; GO:0051321; GO:0035093; GO:0000795; GO:0051301; GO:0005634; GO:0005515; GO:0000800; GO:0000775; GO:0007049	Synaptonemal complex protein 3 OS=Homo sapiens OX=9606 GN=SYCP3 PE=1 SV=1	PF04803.12; PF09784.9	6573_0:003662	1547468at2759	synaptonemal complex protein 3	R-HSA-1221632	Meiotic synapsis
TRINITY_DN56286_c2_g1_i1	sp|Q0VCF9|LSM12_BOVIN	Q0VCF9		Protein LSM12 homolog OS=Bos taurus OX=9913 GN=LSM12 PE=2 SV=2		6573_0:0017ff	1601482at2759	protein LSM12 homolog
TRINITY_DN5673_c0_g1_i3	sp|Q7JK24|B3GT1_GORGO	Q7JK24	GO:0047275; GO:0008532; GO:0016757; GO:0009312; GO:0008499; GO:0030259; GO:0030311; GO:0016758; GO:0016740; GO:0016021; GO:0005794; GO:0006682; GO:0008375; GO:0016020; GO:0006486; GO:0008376; GO:0000139	Beta-1,3-galactosyltransferase 1 OS=Gorilla gorilla gorilla OX=9595 GN=B3GALT1 PE=3 SV=1	PF01762.21	114398_0:0016c4	1037602at2759	Hexosyltransferase
TRINITY_DN5706_c1_g1_i1	sp|P27085|RS26_OCTVU	P27085	GO:0005791; GO:0003735; GO:0022627; GO:0005783; GO:0005737; GO:0002181; GO:0098556; GO:0005829; GO:0005840; GO:0006412; GO:0042788	40S ribosomal protein S26 OS=Octopus vulgaris OX=6645 GN=RPS26 PE=2 SV=1		6526_0:001c64	10801at6447	40S ribosomal protein S26
TRINITY_DN573_c1_g1_i1					PF07625.11
TRINITY_DN57485_c0_g1_i1	sp|Q32P85|DLRB2_BOVIN	Q32P85	GO:0005856; GO:0005874; GO:0005737; GO:0030286; GO:0005813; GO:0007018; GO:0005868; GO:0045505	Dynein light chain roadblock-type 2 OS=Bos taurus OX=9913 GN=DYNLRB2 PE=3 SV=1		10224_0:004c69	1512428at2759	Dynein light chain roadblock	R-BTA-5620924	Intraflagellar transport
TRINITY_DN5756_c0_g1_i12	sp|Q9Y6B7|AP4B1_HUMAN	Q9Y6B7	GO:0030117; GO:0031904; GO:0008104; GO:0016192; GO:0030131; GO:0019898; GO:0005802; GO:0006886; GO:0015031; GO:0006605; GO:0005515; GO:0005794; GO:0005829; GO:0030276; GO:0032588; GO:0016020; GO:0030124; GO:0006892	AP-4 complex subunit beta-1 OS=Homo sapiens OX=9606 GN=AP4B1 PE=1 SV=2	PF12348.8; PF06488.11; PF13646.6; PF10363.9; PF01602.20; PF02985.22; PF12717.7	6573_0:001ddb	120606at33208	AP complex subunit beta	R-HSA-432720; R-HSA-432722	Lysosome Vesicle Biogenesis; Golgi Associated Vesicle Biogenesis
TRINITY_DN5766_c1_g1_i1					PF11870.8	6500_0:0037cc	1432016at2759	uncharacterized protein LOC106167391
TRINITY_DN5787_c0_g1_i2	sp|Q9DAR0|CE049_MOUSE	Q9DAR0	GO:0008150; GO:0036064; GO:0003674	Uncharacterized protein C5orf49 homolog OS=Mus musculus OX=10090 PE=1 SV=1	PF15074.6	6565_0:00460a	1553723at2759	uncharacterized protein C5orf49 homolog
TRINITY_DN5790_c0_g1_i15					PF11625.8	6565_0:000c9f	15888at6447	uncharacterized protein LOC111113610
TRINITY_DN5803_c0_g1_i16					PF15149.6
TRINITY_DN5842_c0_g1_i3					PF12836.7
TRINITY_DN5842_c0_g4_i1					PF12836.7; PF02022.19; PF12056.8; PF03934.13
TRINITY_DN5854_c0_g1_i3	sp|Q92824|PCSK5_HUMAN	Q92824	GO:0032455; GO:0004175; GO:0005796; GO:0009952; GO:0002001; GO:0051004; GO:0005576; GO:0008233; GO:0005515; GO:0005794; GO:0016485; GO:0001822; GO:0007267; GO:0005615	Proprotein convertase subtilisin/kexin type 5 OS=Homo sapiens OX=9606 GN=PCSK5 PE=1 SV=4	PF01483.20; PF00082.22	50429_0:001c0d	308083at2759	Peptidase S8/S53 domain	R-HSA-167060; R-HSA-8963889	NGF processing; Assembly of active LPL and LIPC lipase complexes
TRINITY_DN5874_c0_g1_i1	sp|A9JTJ0|SIM15_XENLA	A9JTJ0	GO:0016020; GO:0016021	Small integral membrane protein 15 OS=Xenopus laevis OX=8355 GN=smim15 PE=3 SV=1		7741_0:003258	1613746at2759	small integral membrane protein 15
TRINITY_DN5886_c1_g1_i1					PF03653.13
TRINITY_DN59243_c0_g1_i1	sp|Q8N8K9|K1958_HUMAN	Q8N8K9	GO:0005515	Uncharacterized protein KIAA1958 OS=Homo sapiens OX=9606 GN=KIAA1958 PE=1 SV=1	PF12012.8	7741_0:000e97	1347426at2759	KIAA1958
TRINITY_DN59243_c1_g1_i1						1720309_0:001387	395953at33208	uncharacterized protein KIAA1958 homolog
TRINITY_DN59559_c0_g1_i1	sp|Q4KLF5|BT3L4_XENLA	Q4KLF5		Transcription factor BTF3 homolog 4 OS=Xenopus laevis OX=8355 GN=btf3l4 PE=2 SV=1	PF01849.18	6565_0:000d8e	10080at1206795	Transcription factor BTF3
TRINITY_DN5970_c0_g1_i1	sp|Q05752|NDUA7_BOVIN	Q05752	GO:0070469; GO:0005743; GO:0042773; GO:0003735; GO:0008137; GO:0005739; GO:0005747; GO:0032543; GO:0005761; GO:0016020; GO:0006120; GO:0016491	NADH dehydrogenase [ubiquinone] 1 alpha subcomplex subunit 7 OS=Bos taurus OX=9913 GN=NDUFA7 PE=1 SV=2	PF07347.12	28743_0:0051da	130844at7898	NADH dehydrogenase	R-BTA-611105; R-BTA-6799198	Respiratory electron transport; Complex I biogenesis
TRINITY_DN5971_c3_g1_i1	sp|Q567I9|CB5D1_DANRE	Q567I9	GO:0005575; GO:0046872	Cytochrome b5 domain-containing protein 1 OS=Danio rerio OX=7955 GN=cyb5d1 PE=2 SV=1	PF00240.23; PF11976.8; PF00173.28	225164_0:003b71	1534331at2759	cytochrome b5 domain-containing protein 1
TRINITY_DN5977_c0_g1_i1	sp|Q9VM21|GUDU_DROME	Q9VM21	GO:0007291; GO:0003674; GO:0007283; GO:0030154	Armadillo repeat-containing protein gudu OS=Drosophila melanogaster OX=7227 GN=gudu PE=2 SV=1		6573_0:0058af	185919at33208	armadillo repeat-containing protein 4
TRINITY_DN59916_c0_g1_i3	sp|Q90352|AVT_CATCO	Q90352	GO:0007186; GO:0007165; GO:0004930; GO:0016021; GO:0005886; GO:0016020; GO:0005000	[Arg8]-vasotocin receptor OS=Catostomus commersonii OX=7971 PE=2 SV=1	PF14914.6; PF09925.9; PF00001.21	37653_0:002874	471766at33208	gonadotropin-releasing hormone II receptor-like
TRINITY_DN601_c2_g2_i1	sp|Q99LZ3|SLD5_MOUSE	Q99LZ3	GO:0000727; GO:0005694; GO:0000811; GO:0005737; GO:0001833; GO:0005515; GO:0006261; GO:0005634; GO:0006260; GO:0071162	DNA replication complex GINS protein SLD5 OS=Mus musculus OX=10090 GN=Gins4 PE=1 SV=1	PF07904.13; PF16922.5; PF05916.11	6565_0:00541e	1434266at2759	DNA replication complex GINS protein SLD5	R-MMU-176974	Unwinding of DNA
TRINITY_DN60148_c0_g1_i2	sp|Q6PEV8|F199X_HUMAN	Q6PEV8	GO:0005515	Protein FAM199X OS=Homo sapiens OX=9606 GN=FAM199X PE=1 SV=1	PF17035.5; PF15814.5	6573_0:0013e6	10700at6447	protein FAM199X-like
TRINITY_DN6018_c0_g1_i1	sp|Q6UXI9|NPNT_HUMAN	Q6UXI9	GO:0071356; GO:0005178; GO:0070374; GO:0001657; GO:0062023; GO:0005509; GO:0007155; GO:0007275; GO:0030198; GO:0005576; GO:0030154; GO:0005201; GO:0007160; GO:0070062; GO:0001658; GO:0045669; GO:0010811; GO:0033631	Nephronectin OS=Homo sapiens OX=9606 GN=NPNT PE=2 SV=3	PF12947.7; PF00008.27; PF07645.15; PF12662.7; PF18526.1; PF14670.6; PF18278.1; PF12661.7	6573_0:000aed	10273at6447	uncharacterized protein LOC106877086
TRINITY_DN6030_c0_g3_i1	sp|Q6DGB6|CC103_DANRE	Q6DGB6	GO:0036157; GO:0036159; GO:0003341; GO:0007368; GO:0042995; GO:0005737; GO:0005576; GO:0031514; GO:0070286; GO:0003146; GO:0030030; GO:0003351; GO:0005930; GO:0001947; GO:0005929; GO:0003674; GO:0003143; GO:0090660	Coiled-coil domain-containing protein 103 OS=Danio rerio OX=7955 GN=ccdc103 PE=1 SV=1	PF13877.6; PF00485.18; PF17288.2; PF15867.5	6573_0:003c3b	1451158at2759	coiled-coil domain-containing protein 103
TRINITY_DN606_c1_g1_i6					PF05050.12; PF08241.12; PF13489.6; PF18164.1	225164_0:0024db	11031at1206795	Methyltransferase FkbM
TRINITY_DN6077_c0_g1_i2	sp|A1A4P4|G45IP_BOVIN	A1A4P4	GO:0005759; GO:0071850; GO:0005634; GO:0005739; GO:0005840; GO:0007049	Growth arrest and DNA damage-inducible proteins-interacting protein 1 OS=Bos taurus OX=9913 GN=GADD45GIP1 PE=2 SV=1	PF15478.6; PF10496.9; PF12353.8; PF13751.6; PF10147.9	6573_0:004082	1431395at2759	growth arrest and DNA damage-inducible proteins-interacting protein 1	R-BTA-5389840; R-BTA-5419276	Mitochondrial translation elongation; Mitochondrial translation termination
TRINITY_DN60831_c0_g1_i2						29159_0:0031d7	1233632at2759	Reverse transcriptase
TRINITY_DN61221_c0_g1_i2						7739_0:00043b	1462481at2759	uncharacterized protein LOC106179309
TRINITY_DN61887_c0_g2_i1					PF08635.10
TRINITY_DN6232_c0_g1_i1	sp|P69149|H31_TETPY	P69149	GO:0000786; GO:0005694; GO:0003677; GO:0046982; GO:0005634	Histone H3 OS=Tetrahymena pyriformis OX=5908 PE=1 SV=2	PF00808.23; PF07524.13; PF02291.15; PF15511.6; PF15630.6; PF00125.24	121845_0:001408	102380at50557	Ribonuclease H superfamily
TRINITY_DN6233_c0_g1_i1	sp|Q8BTQ0|PCGF3_MOUSE	Q8BTQ0	GO:0031519; GO:0060819; GO:0035102; GO:0005654; GO:0036353; GO:0005515; GO:0046872; GO:0005634; GO:0006357; GO:0000805	Polycomb group RING finger protein 3 OS=Mus musculus OX=10090 GN=PcgF3 PE=1 SV=1	PF16685.5; PF00097.25; PF13923.6; PF13445.6; PF13639.6; PF12678.7; PF06906.11; PF14835.6; PF12773.7; PF14447.6; PF14634.6; PF13920.6; PF14570.6; PF14353.6; PF15227.6; PF16207.5; PF11789.8; PF17032.5	6573_0:004c4a	1203951at2759	polycomb group RING finger protein 3
TRINITY_DN62346_c1_g1_i1	sp|P80585|TBCA_CHICK	P80585	GO:0005856; GO:0005874; GO:0005737; GO:0007021; GO:0006457; GO:0015631; GO:0007023; GO:0005829; GO:0048487; GO:0015630	Tubulin-specific chaperone A OS=Gallus gallus OX=9031 GN=TBCA PE=1 SV=2	PF02970.16	13037_0:002828	11825at37572	tubulin-specific chaperone A
TRINITY_DN6324_c0_g1_i2	sp|Q9P4Z1|TOM1_NEUCR	Q9P4Z1	GO:0045732; GO:0004842; GO:0005737; GO:0016567; GO:0016740; GO:0043161; GO:0051028; GO:0005634; GO:0000209; GO:0061630	E3 ubiquitin-protein ligase TOM1-like OS=Neurospora crassa (strain ATCC 24698 / 74-OR23-1A / CBS 708.71 / DSM 1257 / FGSC 987) OX=367110 GN=B11B22.010 PE=3 SV=4	PF00632.25; PF18694.1	10224_0:0010d6	407515at33208	G2/M phase-specific E3 ubiquitin-protein ligase-like
TRINITY_DN63711_c0_g1_i1						6573_0:004cd2	1351419at2759	testis-expressed sequence 36 protein
TRINITY_DN6406_c0_g1_i1					PF02060.15; PF09796.9; PF04956.13; PF09534.10; PF01534.17
TRINITY_DN64386_c0_g1_i1					PF00807.17; PF18263.1
TRINITY_DN6519_c0_g1_i1	sp|Q4R6U7|RM30_MACFA	Q4R6U7	GO:0005762; GO:0003735; GO:0015934; GO:0005739; GO:0005840; GO:0006412	39S ribosomal protein L30, mitochondrial OS=Macaca fascicularis OX=9541 GN=MRPL30 PE=2 SV=1	PF00327.20	6526_0:001fc1	10966at6447	uncharacterized protein LOC106061481
TRINITY_DN65199_c0_g1_i2					PF00643.24
TRINITY_DN65216_c0_g1_i1	sp|O88441|MTX2_MOUSE	O88441	GO:0001401; GO:0005741; GO:0005737; GO:0005739; GO:0015031; GO:0003674; GO:0007005; GO:0016020; GO:0005730	Metaxin-2 OS=Mus musculus OX=10090 GN=Mtx2 PE=1 SV=1	PF10568.9; PF17172.4	6573_0:005b5a	1219712at2759	metaxin-2
TRINITY_DN6572_c0_g1_i1	sp|Q8NEY3|SPAT4_HUMAN	Q8NEY3	GO:0005737; GO:0008017; GO:0051493; GO:0005575; GO:0005930; GO:0005634; GO:0003674; GO:0005515	Spermatogenesis-associated protein 4 OS=Homo sapiens OX=9606 GN=SPATA4 PE=1 SV=1	PF06294.11; PF11971.8	29159_0:005190	1471531at2759	sperm flagellar protein 1
TRINITY_DN6572_c0_g2_i1						29159_0:005190	1471531at2759	sperm flagellar protein 1
TRINITY_DN6580_c0_g3_i3	sp|Q91WN1|DNJC9_MOUSE	Q91WN1	GO:0005654; GO:0032781; GO:0005737; GO:0005886; GO:0005634; GO:0005829; GO:0016020; GO:0005615; GO:0031072	DnaJ homolog subfamily C member 9 OS=Mus musculus OX=10090 GN=Dnajc9 PE=1 SV=2	PF00226.31	6565_0:00079d	1416483at2759	DnaJ domain
TRINITY_DN66169_c0_g1_i1	sp|P11031|TCP4_MOUSE	P11031	GO:0003678; GO:0051260; GO:0051053; GO:0003677; GO:0006355; GO:0003713; GO:0000978; GO:0005654; GO:0003697; GO:0003690; GO:0060261; GO:0032508; GO:0005634; GO:0005667; GO:0042802; GO:0060395; GO:0006357; GO:0005730	Activated RNA polymerase II transcriptional coactivator p15 OS=Mus musculus OX=10090 GN=Sub1 PE=1 SV=3		6565_0:003175	11434at6447	Activated RNA polymerase II transcriptional coactivator p15
TRINITY_DN6618_c0_g3_i2	sp|Q68DL7|CR063_HUMAN	Q68DL7		Uncharacterized protein C18orf63 OS=Homo sapiens OX=9606 GN=C18orf63 PE=2 SV=2	PF15813.5	6573_0:00236c	1388892at2759	uncharacterized protein C18orf63 homolog
TRINITY_DN6817_c0_g2_i2	sp|Q66H10|FBX39_RAT	Q66H10	GO:0031146; GO:0019005	F-box only protein 39 OS=Rattus norvegicus OX=10116 GN=Fbxo39 PE=2 SV=2	PF12799.7; PF13516.6; PF00646.33; PF13959.6; PF12937.7; PF18511.1	6565_0:004d94	1046098at2759	Leucine-rich repeat, cysteine-containing subtype
TRINITY_DN6854_c0_g1_i1	sp|A6H584|CO6A5_MOUSE	A6H584	GO:0005581; GO:0062023; GO:0007155; GO:0031012; GO:0005576; GO:0030020	Collagen alpha-5(VI) chain OS=Mus musculus OX=10090 GN=Col6a5 PE=1 SV=4		6500_0:00441e	15345at6447	collagen alpha-5(VI) chain-like	R-MMU-1442490; R-MMU-1650814; R-MMU-186797; R-MMU-2022090; R-MMU-216083; R-MMU-3000178; R-MMU-419037; R-MMU-8948216	Collagen degradation; Collagen biosynthesis and modifying enzymes; Signaling by PDGF; Assembly of collagen fibrils and other multimeric structures; Integrin cell surface interactions; ECM proteoglycans; NCAM1 interactions; Collagen chain trimerization
TRINITY_DN68767_c0_g1_i1					PF14933.6
TRINITY_DN691_c1_g1_i2					PF10523.9	198806_0:00045e	161914at32523	uncharacterized protein LOC104363424
TRINITY_DN6925_c0_g1_i1	sp|Q5XG64|EMRE_XENLA	Q5XG64	GO:0036444; GO:1990246; GO:0005743; GO:0051560; GO:0006851; GO:0006816; GO:0016021; GO:0016020; GO:0006811; GO:0005739; GO:0031305	Essential MCU regulator, mitochondrial OS=Xenopus laevis OX=8355 GN=smdt1 PE=3 SV=1		75366_0:00a0a7	134958at7898	essential MCU regulator, mitochondrial
TRINITY_DN6926_c0_g1_i1	sp|Q9VXE0|RUXG_DROME	Q9VXE0	GO:0005681; GO:0005687; GO:0005685; GO:0071011; GO:1990904; GO:0008380; GO:0071004; GO:0071013; GO:0005737; GO:0003723; GO:0097526; GO:0005689; GO:0005686; GO:0034719; GO:0000387; GO:0000398; GO:0006397; GO:0005634; GO:0030532; GO:0005682; GO:0043186	Probable small nuclear ribonucleoprotein G OS=Drosophila melanogaster OX=7227 GN=SNRPG PE=1 SV=1		6573_0:0015fd	10993at6447	small nuclear ribonucleoprotein G-like	R-DME-111367; R-DME-72163; R-DME-72165; R-DME-73856; R-DME-77588	SLBP independent Processing of Histone Pre-mRNAs; mRNA Splicing - Major Pathway; mRNA Splicing - Minor Pathway; RNA Polymerase II Transcription Termination; SLBP Dependent Processing of Replication-Dependent Histone Pre-mRNAs
TRINITY_DN6929_c1_g1_i4	sp|Q8K2D0|F199X_MOUSE	Q8K2D0	GO:0008150; GO:0005575; GO:0003674	Protein FAM199X OS=Mus musculus OX=10090 GN=Fam199x PE=2 SV=1	PF15814.5	6573_0:0013e6	10700at6447	protein FAM199X-like
TRINITY_DN69489_c0_g2_i1						225164_0:004a74	16335at6447	uncharacterized protein LOC109618122
TRINITY_DN69581_c0_g1_i1	sp|Q148C8|MIEN1_BOVIN	Q148C8	GO:0010269; GO:0030335; GO:0005654; GO:0005737; GO:0006915; GO:0031235; GO:0005886; GO:0005829; GO:0051491; GO:0016020; GO:0043066	Migration and invasion enhancer 1 OS=Bos taurus OX=9913 GN=MIEN1 PE=3 SV=1		114398_0:001fcd	154862at6656	migration and invasion enhancer 1
TRINITY_DN7039_c1_g1_i1					PF03955.14
TRINITY_DN7120_c0_g2_i2	sp|Q0MQA3|NDUA6_PONPY	Q0MQA3	GO:0070469; GO:0032981; GO:0005743; GO:0005747; GO:0016020; GO:0005739	NADH dehydrogenase [ubiquinone] 1 alpha subcomplex subunit 6 OS=Pongo pygmaeus OX=9600 GN=NDUFA6 PE=2 SV=3	PF00799.20; PF05347.15; PF13233.6	6500_0:000f30	10802at6447	NADH dehydrogenase
TRINITY_DN7160_c0_g1_i4	sp|Q9P286|PAK5_HUMAN	Q9P286	GO:0000166; GO:0106310; GO:0005524; GO:0005737; GO:0004674; GO:0006915; GO:0008283; GO:0031098; GO:0007165; GO:0106311; GO:0032147; GO:0001558; GO:0005515; GO:0005634; GO:0016477; GO:0005739; GO:0007010	Serine/threonine-protein kinase PAK 5 OS=Homo sapiens OX=9606 GN=PAK5 PE=1 SV=1	PF17667.1; PF07714.17; PF01636.23; PF00069.25	29159_0:005b54	1483090at2759	uncharacterized protein LOC101858499	R-HSA-428540	Activation of RAC1
TRINITY_DN71770_c0_g1_i2	sp|Q5VUE5|CA053_HUMAN	Q5VUE5		Uncharacterized protein C1orf53 OS=Homo sapiens OX=9606 GN=C1orf53 PE=1 SV=1	PF17653.1	29159_0:002242	11528at6447	uncharacterized protein LOC111125895
TRINITY_DN7203_c0_g1_i4					PF15502.6
TRINITY_DN7240_c0_g1_i1	sp|Q53H47|SETMR_HUMAN	Q53H47	GO:0071157; GO:0005694; GO:0003677; GO:0042803; GO:0000737; GO:2001034; GO:0004519; GO:0000729; GO:0005515; GO:0006974; GO:0005634; GO:0003824; GO:2001251; GO:0008168; GO:0005730	Histone-lysine N-methyltransferase SETMAR OS=Homo sapiens OX=9606 GN=SETMAR PE=1 SV=2	PF15015.6	7070_0:002f4f	101807at6656	histone-lysine N-methyltransferase SETMAR-like
TRINITY_DN7242_c0_g1_i1	sp|P45842|RL34_AEDAL	P45842	GO:0003735; GO:0005840; GO:0006412	60S ribosomal protein L34 OS=Aedes albopictus OX=7160 GN=RpL34 PE=2 SV=2	PF01199.18	6573_0:000e01	10148at6447	60S ribosomal protein L34-like
TRINITY_DN7273_c0_g1_i2						438502_0:004f13	1485595at2759	Chromosome 19 open reading frame 66
TRINITY_DN728_c1_g2_i1					PF12726.7
TRINITY_DN7282_c0_g2_i1					PF14163.6
TRINITY_DN7298_c0_g1_i2					PF07989.11; PF12179.8; PF08614.11; PF09498.10; PF04131.14; PF08317.11; PF07926.12; PF09969.9; PF01594.16; PF12718.7	6565_0:0041cf	1836312at2759	V4B3P6_LOTGI
TRINITY_DN7298_c0_g2_i1					PF07989.11; PF12179.8; PF06005.12; PF04131.14; PF07926.12; PF02609.16; PF08317.11; PF10473.9; PF09498.10; PF04632.12; PF12718.7; PF01594.16; PF09969.9	6565_0:0041cf	1836312at2759	V4B3P6_LOTGI
TRINITY_DN73200_c0_g1_i1	sp|Q8IY84|NIM1_HUMAN	Q8IY84	GO:0042149; GO:0000166; GO:0106310; GO:0000287; GO:0005524; GO:0004672; GO:0004674; GO:0005737; GO:0006468; GO:0016740; GO:0106311; GO:0016310; GO:0046872; GO:0005634; GO:0035556; GO:0016301	Serine/threonine-protein kinase NIM1 OS=Homo sapiens OX=9606 GN=NIM1K PE=1 SV=1		29159_0:0012c3	1127668at2759	Non-specific serine/threonine protein kinase
TRINITY_DN7375_c0_g2_i1	sp|Q9WVJ4|SYJ2B_RAT	Q9WVJ4	GO:0098609; GO:0005741; GO:0016323; GO:0016021; GO:0008593; GO:0016020; GO:0001937; GO:0008328; GO:0070373; GO:0043113; GO:0016525; GO:0010596; GO:0002092; GO:0098839; GO:0005739; GO:0045197; GO:0031594; GO:0007268; GO:0048312; GO:0043005; GO:0097120; GO:0002090; GO:1903671; GO:0031307; GO:0030054	Synaptojanin-2-binding protein OS=Rattus norvegicus OX=10116 GN=Synj2bp PE=1 SV=2	PF17820.1; PF13180.6; PF17231.2; PF14283.6; PF00595.24	6573_0:00124e	10890at6447	Synaptojanin-2-binding protein	R-RNO-438066; R-RNO-5673001; R-RNO-6794361	Unblocking of NMDA receptors, glutamate binding and activation; RAF/MAP kinase cascade; Neurexins and neuroligins
TRINITY_DN73771_c0_g1_i1					PF12389.8; PF04856.13; PF17098.5; PF15397.6; PF04977.15	6500_0:002965	1168106at2759	uncharacterized protein C20orf96 homolog
TRINITY_DN7386_c0_g2_i1	sp|Q9CRC6|BORC7_MOUSE	Q9CRC6	GO:0099078; GO:0005765; GO:0008150; GO:0005764; GO:0003674; GO:0016020	BLOC-1-related complex subunit 7 OS=Mus musculus OX=10090 GN=Borcs7 PE=1 SV=1	PF16088.5	6500_0:002810	11358at6447	UPF0693 protein C10orf32 homolog
TRINITY_DN744_c1_g1_i4	sp|Q28895|NPC2_CANLF	Q28895	GO:0033344; GO:0032367; GO:0015918; GO:0030301; GO:0006869; GO:0008202; GO:0005783; GO:0005576; GO:0005764; GO:0015485; GO:0006629; GO:0008203; GO:0032934	NPC intracellular cholesterol transporter 2 OS=Canis lupus familiaris OX=9615 GN=NPC2 PE=2 SV=1		8078_0:00019e	123634at7898	epididymal secretory protein E1
TRINITY_DN74679_c0_g1_i1						6565_0:007bb4
TRINITY_DN748_c0_g1_i7						215358_0:00004f	248826at7742	uncharacterized protein LOC109968716
TRINITY_DN7530_c0_g1_i2					PF00249.31; PF13921.6; PF08914.11; PF12276.8
TRINITY_DN75482_c0_g1_i1	sp|O61598|RL37A_OSTOS	O61598	GO:0003735; GO:0005840; GO:0046872; GO:0006412	60S ribosomal protein L37a OS=Ostertagia ostertagi OX=6317 GN=rpl-37a PE=3 SV=3		37653_0:0035b3	10561at6447	60S ribosomal protein L37a
TRINITY_DN756_c1_g1_i1	sp|Q2NL11|CH074_BOVIN	Q2NL11		Uncharacterized protein C8orf74 homolog OS=Bos taurus OX=9913 PE=2 SV=1	PF14769.6; PF01086.17; PF10197.9; PF14674.6	29159_0:003b27	10052at1206795	uncharacterized protein C8orf74 homolog
TRINITY_DN7567_c0_g1_i2					PF00515.28; PF09645.10; PF13424.6; PF05219.12; PF03281.14; PF13176.6	6573_0:003c9d
TRINITY_DN7583_c0_g1_i2					PF16041.5
TRINITY_DN7585_c0_g1_i1	sp|Q8BG58|P4HTM_MOUSE	Q8BG58	GO:0004656; GO:0005509; GO:0005783; GO:0005789; GO:0045646; GO:0016705; GO:0016491; GO:0051213; GO:0016021; GO:0005506; GO:0018401; GO:0046872; GO:0016020; GO:0031418; GO:0016706	Transmembrane prolyl 4-hydroxylase OS=Mus musculus OX=10090 GN=P4htm PE=1 SV=1		48498_0:000dc2	1438683at2759	transmembrane prolyl 4-hydroxylase
TRINITY_DN770_c0_g3_i1	sp|Q9D3J5|ANR22_MOUSE	Q9D3J5	GO:0008150; GO:0005575; GO:0003674	Ankyrin repeat domain-containing protein 22 OS=Mus musculus OX=10090 GN=Ankrd22 PE=2 SV=1	PF00023.30; PF13637.6; PF12796.7; PF13606.6; PF13857.6	6565_0:007235	1545635at2759	Ankyrin repeat-containing domain
TRINITY_DN77332_c1_g1_i1	sp|Q91VR8|BRK1_MOUSE	Q91VR8	GO:0001701; GO:0030036; GO:0007015; GO:0031209; GO:0005856; GO:0030027; GO:0048870; GO:0005737; GO:2000601; GO:0031334; GO:0042802; GO:0016601; GO:0010592; GO:0008284; GO:0044877; GO:0031267	Protein BRICK1 OS=Mus musculus OX=10090 GN=Brk1 PE=1 SV=1		225164_0:002eff	11151at6447	protein BRICK1-like	R-MMU-2029482; R-MMU-4420097; R-MMU-5663213	Regulation of actin dynamics for phagocytic cup formation; VEGFA-VEGFR2 Pathway; RHO GTPases Activate WASPs and WAVEs
TRINITY_DN7759_c0_g1_i2					PF15710.5
TRINITY_DN7765_c0_g1_i1	sp|P50615|BTG3_MOUSE	P50615	GO:0005515; GO:0005737; GO:0005634; GO:0045930; GO:0008285	Protein BTG3 OS=Mus musculus OX=10090 GN=Btg3 PE=2 SV=1	PF18764.1; PF07742.12	29159_0:00089a	11043at6447	B-cell translocation gene 1
TRINITY_DN7776_c0_g1_i1	sp|Q63ZL2|HOP2_XENLA	Q63ZL2	GO:0007131; GO:0006310; GO:0005634; GO:0051321	Homologous-pairing protein 2 homolog OS=Xenopus laevis OX=8355 GN=psmc3ip PE=2 SV=1	PF17279.2; PF07851.13; PF18517.1; PF09440.10; PF16591.5; PF01017.20; PF07926.12; PF09370.10; PF08286.11	6573_0:0016bb	1498024at2759	homologous-pairing protein 2 homolog
TRINITY_DN7776_c0_g2_i1	sp|Q63ZL2|HOP2_XENLA	Q63ZL2	GO:0007131; GO:0006310; GO:0005634; GO:0051321	Homologous-pairing protein 2 homolog OS=Xenopus laevis OX=8355 GN=psmc3ip PE=2 SV=1		6565_0:007eda	1498024at2759	homologous-pairing protein 2 homolog
TRINITY_DN7791_c0_g2_i10						7091_0:002ff0	1553369at2759	Transposable element Tc1 transposase
TRINITY_DN7806_c0_g1_i3						10224_0:0018d2	1156861at2759	Pyridoxal phosphate-dependent transferase
TRINITY_DN7807_c0_g1_i1	sp|Q9D411|TSSK4_MOUSE	Q9D411	GO:0106310; GO:0000287; GO:0005524; GO:0004674; GO:0005737; GO:0006468; GO:0106311; GO:0031514; GO:0001669; GO:0005634; GO:0035556; GO:0032793	Testis-specific serine/threonine-protein kinase 4 OS=Mus musculus OX=10090 GN=Tssk4 PE=1 SV=1	PF01585.23; PF17667.1; PF07714.17; PF14531.6; PF00069.25	225164_0:003e6c	403296at33208	testis-specific serine/threonine-protein kinase 3
TRINITY_DN7863_c0_g1_i1					PF13875.6
TRINITY_DN78660_c0_g1_i1					PF00612.27
TRINITY_DN78761_c0_g1_i9	sp|Q62293|TGTP1_MOUSE	Q62293	GO:0035455; GO:0000166; GO:0045087; GO:0016787; GO:0035458; GO:0006955; GO:0005783; GO:0005737; GO:0005789; GO:0002376; GO:0003924; GO:0009617; GO:0006952; GO:0005794; GO:0009615; GO:0016020; GO:0005525; GO:0034341	T-cell-specific guanine nucleotide triphosphate-binding protein 1 OS=Mus musculus OX=10090 GN=Tgtp1 PE=1 SV=1	PF03193.16; PF13479.6; PF00158.26; PF00437.20; PF00350.23; PF00931.22; PF00071.22; PF04670.12; PF13191.6; PF01926.23; PF02492.19; PF13555.6; PF13401.6; PF12775.7; PF03266.15; PF00735.18; PF00005.27; PF10236.9; PF05049.13; PF08477.13; PF05729.12; PF02421.18; PF13604.6; PF00503.20	28377_0:0048f9	158829at32523	interferon-inducible GTPase 5-like
TRINITY_DN7900_c1_g1_i1						6565_0:00042c	20756at1206795	putative nuclease HARBI1
TRINITY_DN79436_c0_g1_i1						6573_0:001f4d	11136at6447	uncharacterized protein C6orf163 homolog
TRINITY_DN7961_c0_g4_i1	sp|Q2KJD2|VAMP3_BOVIN	Q2KJD2	GO:0017075; GO:0019905; GO:0031201; GO:0001921; GO:0043005; GO:0006906; GO:0016192; GO:0015031; GO:0034446; GO:0005484; GO:0016021; GO:0005886; GO:0035493; GO:0005829; GO:0030054; GO:0045202; GO:0016020; GO:0042147	Vesicle-associated membrane protein 3 OS=Bos taurus OX=9913 GN=VAMP3 PE=3 SV=1	PF17359.2; PF03631.15; PF15050.6; PF02009.16; PF13908.6; PF15106.6; PF12279.8; PF04678.13; PF06024.12; PF06789.12; PF05987.13; PF13800.6; PF05393.11; PF17355.2; PF15883.5; PF10717.9; PF00957.21; PF12575.8	225164_0:0041ff	11104at6447	synaptobrevin
TRINITY_DN79845_c1_g1_i3	sp|Q5VSY0|GKAP1_HUMAN	Q5VSY0	GO:0042802; GO:0005794; GO:0005515; GO:0007165; GO:0046628	G kinase-anchoring protein 1 OS=Homo sapiens OX=9606 GN=GKAP1 PE=1 SV=2	PF11598.8; PF16331.5	6565_0:003118	10102at6447	A0A0L8GR03_OCTBM
TRINITY_DN79845_c1_g2_i1					PF08702.10; PF15383.6; PF15188.6; PF16331.5	29159_0:004f8e	10102at6447	A0A0L8GR03_OCTBM
TRINITY_DN79959_c0_g1_i1	sp|Q494R4|CC153_HUMAN	Q494R4	GO:0042802; GO:0005515	Coiled-coil domain-containing protein 153 OS=Homo sapiens OX=9606 GN=CCDC153 PE=1 SV=2	PF13319.6; PF06005.12; PF12999.7	133434_0:002d48	1357888at2759	coiled-coil domain-containing protein 153
TRINITY_DN8004_c0_g1_i1					PF05680.12
TRINITY_DN80283_c0_g1_i1	sp|Q66H60|CC146_RAT	Q66H60	GO:0005815; GO:0005737; GO:0005856; GO:0005814	Coiled-coil domain-containing protein 146 OS=Rattus norvegicus OX=10116 GN=Ccdc146 PE=1 SV=1		7574_0:005014	1018at1206795	coiled-coil domain-containing protein 146-like
TRINITY_DN8081_c1_g1_i4	sp|Q63699|CDK2_RAT	Q63699	GO:0030332; GO:0000166; GO:0005856; GO:0106310; GO:0005768; GO:0005815; GO:0015030; GO:0007165; GO:0005737; GO:0010389; GO:0006468; GO:0106311; GO:0006281; GO:0006974; GO:0005634; GO:0008284; GO:0000082; GO:0010468; GO:0000307; GO:0004693; GO:0016301	Cyclin-dependent kinase 2 OS=Rattus norvegicus OX=10116 GN=Cdk2 PE=1 SV=1	PF07387.11; PF00069.25; PF07714.17; PF01636.23; PF12330.8; PF14531.6	6565_0:000c05	1010560at2759	cyclin-dependent kinase 1	R-RNO-1538133; R-RNO-176187; R-RNO-176408; R-RNO-187577; R-RNO-2559582; R-RNO-2559586; R-RNO-5693607; R-RNO-6804116; R-RNO-6804757; R-RNO-68911; R-RNO-68949; R-RNO-68962; R-RNO-69017; R-RNO-69200; R-RNO-69202; R-RNO-69273; R-RNO-69563; R-RNO-69656; R-RNO-8849470; R-RNO-9616222	G0 and Early G1; Activation of ATR in response to replication stress; Regulation of APC/C activators between G1/S and early anaphase; SCF(Skp2)-mediated degradation of p27/p21; Senescence-Associated Secretory Phenotype (SASP); DNA Damage/Telomere Stress Induced Senescence; Processing of DNA double-strand break ends; TP53 Regulates Transcription of Genes Involved in G1 Cell Cycle Arrest; Regulatio…
TRINITY_DN81012_c0_g1_i1						37653_0:000fbe	11123at6447	uncharacterized protein C19orf60 homolog
TRINITY_DN81138_c1_g1_i1	sp|Q3T0U2|RL14_BOVIN	Q3T0U2	GO:0003735; GO:0003723; GO:0022625; GO:0005840; GO:0042273; GO:0006412	60S ribosomal protein L14 OS=Bos taurus OX=9913 GN=RPL14 PE=2 SV=3		6500_0:003db9	10079at6447	uncharacterized protein LOC106077658
TRINITY_DN8124_c0_g1_i2	sp|P56597|NDK5_HUMAN	P56597	GO:0006228; GO:0006183; GO:0007283; GO:0007286; GO:0042995; GO:0007275; GO:0030154; GO:0006165; GO:0005515; GO:0048515; GO:0060271; GO:0009116; GO:0006241; GO:0004550	Nucleoside diphosphate kinase homolog 5 OS=Homo sapiens OX=9606 GN=NME5 PE=1 SV=1	PF05186.13; PF00334.19	6565_0:001761	1473942at2759	Nucleoside diphosphate kinase
TRINITY_DN8150_c0_g1_i1	sp|P35659|DEK_HUMAN	P35659	GO:0045815; GO:0003677; GO:0006366; GO:0030851; GO:0005654; GO:0007165; GO:2000779; GO:0005515; GO:0005634; GO:0006325; GO:0019079; GO:0042393; GO:0006357	Protein DEK OS=Homo sapiens OX=9606 GN=DEK PE=1 SV=1	PF05793.12; PF08766.11; PF02037.27	7574_0:006083	10546at1206795	protein DEK-like	R-HSA-5250924; R-HSA-8864260; R-HSA-9616222; R-HSA-9616222	B-WICH complex positively regulates rRNA expression; Transcriptional regulation by the AP-2 (TFAP2) family of transcription factors; Transcriptional regulation of granulopoiesis; Transcriptional regulation of granulopoiesis
TRINITY_DN81545_c0_g1_i3	sp|Q9XZS3|TMA7_DROME	Q9XZS3	GO:0008150; GO:0005575; GO:0002181; GO:0003674	Translation machinery-associated protein 7 homolog OS=Drosophila melanogaster OX=7227 GN=CG13364 PE=4 SV=1		1041015_0:002a8c
TRINITY_DN8169_c0_g2_i7					PF15761.5
TRINITY_DN8174_c0_g1_i3	sp|Q4R5Y0|CK001_MACFA	Q4R5Y0	GO:0005634	UPF0686 protein C11orf1 homolog OS=Macaca fascicularis OX=9541 GN=QtsA-19889 PE=2 SV=1	PF06608.11	29159_0:003de8	1331053at2759	UPF0686 protein C11orf1 homolog
TRINITY_DN8176_c0_g1_i2	sp|Q9CR92|CCD96_MOUSE	Q9CR92	GO:0036064; GO:0005856; GO:0005815; GO:0005737; GO:0005930; GO:0003674; GO:0060271	Coiled-coil domain-containing protein 96 OS=Mus musculus OX=10090 GN=Ccdc96 PE=2 SV=1	PF13870.6; PF01640.17	6573_0:0044b9	392779at33208	coiled-coil domain-containing protein 96
TRINITY_DN8270_c0_g1_i9					PF00431.20	6565_0:005d49	11262at6447	uncharacterized protein LOC106872136
TRINITY_DN8281_c0_g1_i2					PF11974.8; PF12011.8; PF16472.5
TRINITY_DN82837_c0_g1_i1	sp|Q66KY3|CUTA_XENLA	Q66KY3	GO:0010038	Protein CutA homolog OS=Xenopus laevis OX=8355 GN=cuta PE=2 SV=2		6573_0:00570c	10730at6447	protein CutA homolog
TRINITY_DN83027_c0_g1_i1	sp|Q08C53|BBOF1_DANRE	Q08C53	GO:0036064; GO:0005856; GO:0042995; GO:0005737; GO:0044458; GO:0005929	Basal body-orientation factor 1 OS=Danio rerio OX=7955 GN=bbof1 PE=2 SV=2	PF08336.11; PF03193.16; PF06785.11; PF11469.8; PF08454.11; PF17380.2; PF06103.11; PF15188.6; PF04746.12; PF15397.6; PF11802.8; PF04799.13; PF05335.13; PF05531.12; PF07464.11; PF14971.6; PF15070.6; PF08941.10; PF14988.6; PF16515.5; PF06009.12; PF16073.5; PF04513.12; PF02601.15	6500_0:0016c6	400824at33208	basal body-orientation factor 1
TRINITY_DN83171_c0_g1_i1	sp|Q5VTT2|CI135_HUMAN	Q5VTT2	GO:0005737; GO:0016020; GO:0005886; GO:0016021	Protein C9orf135 OS=Homo sapiens OX=9606 GN=C9orf135 PE=1 SV=1	PF15139.6	6573_0:00139b	1568741at2759	uncharacterized protein C9orf135 homolog
TRINITY_DN832_c0_g3_i1	sp|A4IF78|TFIP8_BOVIN	A4IF78	GO:0043027; GO:0005654; GO:0042981; GO:0005737; GO:0006915; GO:0043154; GO:0043065	Tumor necrosis factor alpha-induced protein 8 OS=Bos taurus OX=9913 GN=TNFAIP8 PE=2 SV=1	PF05527.11; PF02565.15	6500_0:002399	1284744at2759	tumor necrosis factor alpha-induced protein 8-like protein 1	R-BTA-1483255	PI Metabolism
TRINITY_DN83494_c0_g1_i2	sp|Q7T0T2|LTR3B_XENLA	Q7T0T2	GO:0032006; GO:0034613; GO:0031902; GO:0071230; GO:0032008; GO:0060090; GO:0016020; GO:0005768; GO:0071986; GO:0005085; GO:0050790	Ragulator complex protein LAMTOR3-B OS=Xenopus laevis OX=8355 GN=lamtor3-b PE=2 SV=1	PF08923.10	7574_0:00165c	11140at1206795	ragulator complex protein LAMTOR3-A isoform X2
TRINITY_DN83705_c0_g1_i1	sp|Q921Y2|IMP3_MOUSE	Q921Y2	GO:0006364; GO:0042254; GO:0005654; GO:0003723; GO:0032040; GO:0034457; GO:0030684; GO:0005634; GO:0030515; GO:0019843; GO:0005730	U3 small nucleolar ribonucleoprotein protein IMP3 OS=Mus musculus OX=10090 GN=Imp3 PE=2 SV=1		6573_0:001867	1336285at2759	RNA-binding S4 domain	R-MMU-6791226	Major pathway of rRNA processing in the nucleolus and cytosol
TRINITY_DN84358_c0_g1_i1	sp|Q5XHC1|CD047_XENLA	Q5XHC1	GO:0005815; GO:0005813; GO:0005737; GO:0005856	UPF0602 protein C4orf47 homolog OS=Xenopus laevis OX=8355 PE=2 SV=1		6573_0:00246a	1015843at2759	UPF0602 protein C4orf47 homolog
TRINITY_DN8462_c0_g1_i1	sp|Q9D9T0|DYDC1_MOUSE	Q9D9T0	GO:0051568; GO:0048188; GO:0006348; GO:0000781; GO:0044666	DPY30 domain-containing protein 1 OS=Mus musculus OX=10090 GN=Dydc1 PE=2 SV=2		6565_0:001791	11939at6447	uncharacterized protein LOC106080150
TRINITY_DN8490_c0_g1_i1	sp|Q80YE2|T53I1_RAT	Q80YE2	GO:0016209; GO:0006355; GO:0008285; GO:0000045; GO:0030336; GO:0010508; GO:0005737; GO:0006915; GO:0010506; GO:0005776; GO:0005634; GO:0005829; GO:0006914; GO:0031410; GO:0045893; GO:0048102	Tumor protein p53-inducible nuclear protein 1 OS=Rattus norvegicus OX=10116 GN=Trp53inp1 PE=2 SV=1	PF10367.9; PF09746.9; PF14839.6	6573_0:000670	10135at6447	uncharacterized protein LOC106051929	R-RNO-6804756	Regulation of TP53 Activity through Phosphorylation
TRINITY_DN84924_c0_g1_i1	sp|P61356|RL27_BOVIN	P61356	GO:0006364; GO:0005791; GO:0003735; GO:0005783; GO:0005737; GO:0098556; GO:0015934; GO:0022625; GO:0005829; GO:0005840; GO:0006412	60S ribosomal protein L27 OS=Bos taurus OX=9913 GN=RPL27 PE=2 SV=2		29159_0:0007e9	1584965at2759	60S ribosomal protein L27	R-BTA-156827; R-BTA-1799339; R-BTA-6791226; R-BTA-72689; R-BTA-72706; R-BTA-975956; R-BTA-975957	L13a-mediated translational silencing of Ceruloplasmin expression; SRP-dependent cotranslational protein targeting to membrane; Major pathway of rRNA processing in the nucleolus and cytosol; Formation of a pool of free 40S subunits; GTP hydrolysis and joining of the 60S ribosomal subunit; Nonsense Mediated Decay (NMD) independent of the Exon Junction Complex (EJC); Nonsense Mediated Decay (NMD) e…
TRINITY_DN8496_c2_g1_i1	sp|Q6DGJ3|TIM13_DANRE	Q6DGJ3	GO:0072321; GO:0005743; GO:0042719; GO:0005739; GO:0015031; GO:0046872; GO:0016020; GO:0005758; GO:0045039	Mitochondrial import inner membrane translocase subunit Tim13 OS=Danio rerio OX=7955 GN=timm13 PE=3 SV=1		37621_0:00340a	1566384at2759	mitochondrial import inner membrane translocase subunit Tim13
TRINITY_DN8591_c0_g1_i2	sp|Q9CQJ8|NDUB9_MOUSE	Q9CQJ8	GO:0070469; GO:0032981; GO:0005743; GO:0005739; GO:0005747; GO:0016020; GO:0006120	NADH dehydrogenase [ubiquinone] 1 beta subcomplex subunit 9 OS=Mus musculus OX=10090 GN=Ndufb9 PE=1 SV=3	PF18489.1; PF05347.15; PF15428.6	13037_0:001d48	10602at37572	NADH dehydrogenase	R-MMU-611105; R-MMU-6799198	Respiratory electron transport; Complex I biogenesis
TRINITY_DN86013_c0_g3_i2	sp|Q3ZBP0|CK074_BOVIN	Q3ZBP0	GO:0120160; GO:0009566; GO:0007340; GO:0007283; GO:0005829; GO:0097731	Protein C11orf74 homolog OS=Bos taurus OX=9913 PE=2 SV=1	PF17722.1; PF10374.9	6573_0:000f49	1316206at2759	uncharacterized protein C11orf74 homolog
TRINITY_DN86407_c0_g1_i1	sp|Q9GJW7|GBRAP_BOVIN	Q9GJW7	GO:0050811; GO:0000422; GO:0005737; GO:0015031; GO:0005930; GO:0005794; GO:0016020; GO:0005874; GO:0006915; GO:0031410; GO:0000226; GO:0005875; GO:0005856; GO:0000045; GO:0006995; GO:0031625; GO:0005776; GO:0000421; GO:0005829; GO:0016236; GO:0006914; GO:0048487	Gamma-aminobutyric acid receptor-associated protein OS=Bos taurus OX=9913 GN=GABARAP PE=3 SV=2		29159_0:001e03	1508198at2759	Autophagy-related protein	R-BTA-1632852; R-BTA-8854214	Macroautophagy; TBC/RABGAPs
TRINITY_DN86467_c0_g1_i1					PF11812.8; PF10999.8
TRINITY_DN86732_c0_g1_i1	sp|Q5D018|RBM8A_DANRE	Q5D018	GO:0000381; GO:0005681; GO:0008380; GO:0006396; GO:0035145; GO:0003676; GO:0005737; GO:0003729; GO:0003723; GO:0000184; GO:0006417; GO:0006397; GO:0051028; GO:0000398; GO:0071006; GO:0005634; GO:0016607	RNA-binding protein 8A OS=Danio rerio OX=7955 GN=rbm8a PE=2 SV=1	PF08777.11; PF16842.5; PF13893.6; PF17797.1; PF00076.22	6526_0:001b87	10098at1206795	RNA-binding protein 8A	R-DRE-159236; R-DRE-72163; R-DRE-72187; R-DRE-73856; R-DRE-975957	Transport of Mature mRNA derived from an Intron-Containing Transcript; mRNA Splicing - Major Pathway; mRNA 3'-end processing; RNA Polymerase II Transcription Termination; Nonsense Mediated Decay (NMD) enhanced by the Exon Junction Complex (EJC)
TRINITY_DN8709_c0_g1_i1						6500_0:0011a0	11694at6447	uncharacterized protein LOC111115438
TRINITY_DN8739_c0_g1_i6	sp|Q9D581|EFC10_MOUSE	Q9D581	GO:0008150; GO:0005509; GO:0005575; GO:0003674	EF-hand calcium-binding domain-containing protein 10 OS=Mus musculus OX=10090 GN=Efcab10 PE=1 SV=1	PF17819.1; PF14658.6; PF17824.1	6565_0:0063c9	10078at6447	EF-hand calcium-binding domain-containing protein 10-like
TRINITY_DN875_c0_g1_i10	sp|Q5R9K8|AR2BP_PONAB	Q5R9K8	GO:0005856; GO:0005758; GO:0003713; GO:0005815; GO:0042995; GO:0005737; GO:0051457; GO:0005634; GO:0005929; GO:0005819; GO:0042531; GO:0005739; GO:0045893	ADP-ribosylation factor-like protein 2-binding protein OS=Pongo abelii OX=9601 GN=ARL2BP PE=2 SV=1	PF12746.7; PF11527.8	6573_0:005b41	1403493at2759	ADP-ribosylation factor-like protein 2-binding protein
TRINITY_DN87587_c0_g1_i1					PF13679.6
TRINITY_DN87988_c0_g1_i1	sp|Q3T025|RL17_BOVIN	Q3T025	GO:0003735; GO:0002181; GO:0015934; GO:0022625; GO:0005840; GO:0006412	60S ribosomal protein L17 OS=Bos taurus OX=9913 GN=RPL17 PE=2 SV=3		6573_0:0040ca	1362349at2759	D-isomer specific 2-hydroxyacid dehydrogenase, NAD-binding domain	R-BTA-156827; R-BTA-1799339; R-BTA-6791226; R-BTA-72689; R-BTA-72706; R-BTA-975956; R-BTA-975957	L13a-mediated translational silencing of Ceruloplasmin expression; SRP-dependent cotranslational protein targeting to membrane; Major pathway of rRNA processing in the nucleolus and cytosol; Formation of a pool of free 40S subunits; GTP hydrolysis and joining of the 60S ribosomal subunit; Nonsense Mediated Decay (NMD) independent of the Exon Junction Complex (EJC); Nonsense Mediated Decay (NMD) e…
TRINITY_DN8802_c0_g1_i1	sp|P0A5S5|PKNB_MYCBO	P0A5S5	GO:0000166; GO:0106310; GO:0005524; GO:0004672; GO:0004674; GO:0006468; GO:0016740; GO:0106311; GO:0016310; GO:0016021; GO:0005886; GO:0046872; GO:0016020; GO:0016301	Serine/threonine-protein kinase PknB OS=Mycobacterium bovis (strain ATCC BAA-935 / AF2122/97) OX=233413 GN=pknB PE=3 SV=1	PF07525.16; PF07714.17; PF16782.5; PF00069.25	48498_0:001ea6	1061777at2759	serine/threonine-protein kinase Nek7-like
TRINITY_DN88091_c0_g1_i1	sp|O54863|TSSK2_MOUSE	O54863	GO:0046777; GO:0007286; GO:0005814; GO:0000287; GO:0005524; GO:0004672; GO:0004674; GO:0005737; GO:0007283; GO:0006468; GO:0016740; GO:0030154; GO:0005515; GO:0046872; GO:0005634; GO:0001669; GO:0035556; GO:0031410; GO:0016301	Testis-specific serine/threonine-protein kinase 2 OS=Mus musculus OX=10090 GN=Tssk2 PE=1 SV=2	PF00069.25; PF17667.1; PF07714.17; PF01636.23; PF06293.14; PF12330.8; PF14531.6	6565_0:0012d0	403296at33208	testis-specific serine/threonine-protein kinase 3
TRINITY_DN88125_c0_g1_i1	sp|P67827|KC1A_BOVIN	P67827	GO:0016607; GO:0045095; GO:0036064; GO:0106310; GO:0005524; GO:0004672; GO:0004674; GO:0005737; GO:0090090; GO:0005847; GO:0006468; GO:0106311; GO:0016740; GO:0042995; GO:0051301; GO:0005634; GO:0018105; GO:0045104; GO:0000777; GO:0000776; GO:0016301	Casein kinase I isoform alpha OS=Bos taurus OX=9913 GN=CSNK1A1 PE=1 SV=1	PF07714.17; PF00069.25	29159_0:005361	1097975at2759	Protein kinase domain	R-BTA-195253; R-BTA-196299; R-BTA-5610785; R-BTA-5635838	Degradation of beta-catenin by the destruction complex; Beta-catenin phosphorylation cascade; GLI3 is processed to GLI3R by the proteasome; Activation of SMO
TRINITY_DN88818_c0_g1_i1	sp|Q2KID6|PLRG1_BOVIN	Q2KID6	GO:0005681; GO:0034504; GO:0000974; GO:0008380; GO:0071013; GO:0001650; GO:0071007; GO:1900087; GO:0005662; GO:0006397; GO:0000398; GO:0005634; GO:0016607; GO:0031965; GO:0080008	Pleiotropic regulator 1 OS=Bos taurus OX=9913 GN=PLRG1 PE=2 SV=1		29159_0:0003d8	1157847at2759	WD40-repeat-containing domain	R-BTA-72163	mRNA Splicing - Major Pathway
TRINITY_DN8896_c0_g2_i3	sp|Q6DHG8|SKA1_DANRE	Q6DHG8	GO:0005694; GO:0005856; GO:0005874; GO:0000940; GO:0005737; GO:0072686; GO:0031110; GO:0008017; GO:0051301; GO:0005876; GO:0007059; GO:0000278; GO:0000776; GO:0007049	Spindle and kinetochore-associated protein 1 OS=Danio rerio OX=7955 GN=ska1 PE=2 SV=1	PF07160.12; PF10241.9; PF16566.5; PF06156.13; PF14606.6; PF07412.12	225164_0:003e91	1354933at2759	spindle and kinetochore-associated protein 1	R-DRE-141444; R-DRE-2467813; R-DRE-2500257; R-DRE-5663220	Amplification of signal from unattached kinetochores via a MAD2 inhibitory signal; Separation of Sister Chromatids; Resolution of Sister Chromatid Cohesion; RHO GTPases Activate Formins
TRINITY_DN89165_c0_g1_i1	sp|Q96DY2|DRC10_HUMAN	Q96DY2	GO:0036064; GO:0005856; GO:0042995; GO:0005737; GO:0031514; GO:0005515; GO:0005929	Dynein regulatory complex protein 10 OS=Homo sapiens OX=9606 GN=IQCD PE=2 SV=2	PF14362.6; PF14892.6; PF06785.11; PF10305.9; PF07926.12; PF08702.10; PF04992.14; PF07851.13; PF03670.13; PF16740.5; PF03938.14; PF11068.8; PF07200.13; PF08287.11; PF09726.9; PF12998.7; PF03961.13; PF08912.11; PF16515.5; PF01214.18; PF16526.5; PF08317.11	6565_0:004a2d	1011316at2759	IQ domain-containing protein D
TRINITY_DN894_c0_g1_i6	sp|P21328|RTJK_DROME	P21328	GO:0016779; GO:0006278; GO:0003964; GO:0016740	RNA-directed DNA polymerase from mobile element jockey OS=Drosophila melanogaster OX=7227 GN=pol PE=1 SV=1	PF09783.9	29159_0:000ec3	1233632at2759	Reverse transcriptase
TRINITY_DN8973_c0_g1_i3					PF08678.10; PF05894.12
TRINITY_DN90043_c0_g1_i1	sp|C0HL66|H33A_DROME	C0HL66	GO:0000786; GO:0005694; GO:0003677; GO:0005700; GO:0030527; GO:0005634; GO:0006336; GO:0006334; GO:0007140; GO:0046982	Histone H3.3A OS=Drosophila melanogaster OX=7227 GN=His3.3A PE=1 SV=1	PF15715.5; PF15511.6; PF00125.24; PF15630.6; PF00808.23	150288_0:000ca8	1564596at2759	Histone H3	R-DME-212300; R-DME-2559580; R-DME-2559582; R-DME-427359; R-DME-5578749; R-DME-5625886; R-DME-73772; R-DME-8936459; R-DME-9018519; R-DME-983231	PRC2 methylates histones and DNA; Oxidative Stress Induced Senescence; Senescence-Associated Secretory Phenotype (SASP); SIRT1 negatively regulates rRNA expression; Transcriptional regulation by small RNAs; Activated PKN1 stimulates transcription of AR (androgen receptor) regulated genes KLK2 and KLK3; RNA Polymerase I Promoter Escape; RUNX1 regulates genes involved in megakaryocyte differentiati…
TRINITY_DN90072_c0_g1_i1	sp|Q6PBP3|PXL2A_DANRE	Q6PBP3	GO:0005737; GO:0098869; GO:0016209	Peroxiredoxin-like 2A OS=Danio rerio OX=7955 GN=prxl2a PE=2 SV=2		6573_0:004e84	1442607at2759	redox-regulatory protein FAM213A isoform X1
TRINITY_DN9036_c0_g2_i2	sp|Q9NRG0|CHRC1_HUMAN	Q9NRG0	GO:0006338; GO:0003677; GO:0008623; GO:0016779; GO:0016740; GO:0005515; GO:0003887; GO:0005634; GO:0071897; GO:0008622; GO:0046982	Chromatin accessibility complex protein 1 OS=Homo sapiens OX=9606 GN=CHRAC1 PE=1 SV=1	PF00125.24; PF00808.23	37653_0:000855	11140at6447	Chromatin accessibility complex protein 1
TRINITY_DN90466_c0_g1_i1					PF18572.1
TRINITY_DN9053_c0_g1_i5					PF10206.9	136037_0:000fde	144929at50557	putative ATP synthase subunit f, mitochondrial
TRINITY_DN9054_c0_g1_i3					PF13903.6; PF03188.16; PF06653.11; PF15109.6; PF09534.10; PF00822.20; PF14927.6; PF03006.20	6565_0:006238	1244077at2759	Claudin
TRINITY_DN9054_c1_g3_i1					PF09398.10; PF16479.5	37653_0:0014e9	12001at6447	uncharacterized protein LOC105335982
TRINITY_DN9059_c1_g1_i2					PF12686.7; PF10523.9
TRINITY_DN9059_c1_g2_i1					PF10523.9
TRINITY_DN90679_c0_g1_i1	sp|O77210|IF4E_APLCA	O77210	GO:0006413; GO:0005737; GO:0003723; GO:0006417; GO:0006412; GO:0003743	Eukaryotic translation initiation factor 4E OS=Aplysia californica OX=6500 PE=1 SV=1		6565_0:000e9d	1394271at2759	Translation Initiation factor eIF- 4e
TRINITY_DN90682_c0_g1_i1	sp|Q9VRV7|SF3B6_DROME	Q9VRV7	GO:0071011; GO:0008380; GO:0003676; GO:0071013; GO:0003729; GO:0003723; GO:0005689; GO:0005686; GO:0006397; GO:0005634; GO:0000398; GO:0005684	Splicing factor 3B subunit 6 OS=Drosophila melanogaster OX=7227 GN=Sf3b6 PE=1 SV=1		225164_0:004cc8	10095at1206795	splicing factor 3B subunit 6-like protein
TRINITY_DN91100_c0_g1_i1						6573_0:0035b0	1032at6447	Kinesin-like protein
TRINITY_DN9145_c0_g2_i2	sp|B5X5D0|CI116_SALSA	B5X5D0		UPF0691 protein C9orf116 homolog OS=Salmo salar OX=8030 PE=2 SV=1	PF14892.6	6565_0:00640e	10678at6447	UPF0691 protein C9orf116 homolog
TRINITY_DN91558_c0_g1_i1					PF09451.10
TRINITY_DN9191_c0_g1_i4						34740_0:000855	115387at33392	Transposable element tc3 transposase
TRINITY_DN92043_c0_g1_i1	sp|Q9H4Q3|PRD13_HUMAN	Q9H4Q3	GO:0003677; GO:0032259; GO:0016740; GO:0046872; GO:0005634; GO:0010468; GO:0008168	PR domain zinc finger protein 13 OS=Homo sapiens OX=9606 GN=PRDM13 PE=2 SV=2	PF00096.26; PF09237.11; PF12171.8; PF12756.7; PF10276.9; PF13909.6; PF02892.15; PF12874.7; PF05605.12; PF13894.6; PF13465.6	29159_0:000d19	1318335at2759	Zinc finger C2H2 superfamily
TRINITY_DN92375_c0_g1_i1	sp|Q91W52|TMM19_MOUSE	Q91W52	GO:0008150; GO:0016020; GO:0003674; GO:0016021	Transmembrane protein 19 OS=Mus musculus OX=10090 GN=Tmem19 PE=1 SV=1		29159_0:0014c6	1476886at2759	transmembrane protein 19
TRINITY_DN92587_c0_g1_i1	sp|P83425|HIP_MYTED	P83425	GO:0046872; GO:0005576	Heavy metal-binding protein HIP OS=Mytilus edulis OX=6550 PE=1 SV=1	PF00386.21; PF18573.1	29159_0:0041fb	19003at1206795	heavy metal-binding protein HIP
TRINITY_DN92837_c0_g1_i1	sp|A7SMR0|MEIG1_NEMVE	A7SMR0	GO:0005634	Meiosis expressed gene 1 protein homolog OS=Nematostella vectensis OX=45351 GN=v1g237368 PE=3 SV=1		29159_0:000b8e	10796at6447	meiosis expressed gene 1 protein homolog
TRINITY_DN9322_c0_g1_i3	sp|Q6NZQ0|CC189_MOUSE	Q6NZQ0	GO:0008150; GO:0005575; GO:0003674	Coiled-coil domain-containing protein 189 OS=Mus musculus OX=10090 GN=Ccdc189 PE=1 SV=2	PF14769.6; PF05887.11	29159_0:000439	1491476at2759	Coiled-coil domain containing 189
TRINITY_DN9322_c0_g2_i1						6573_0:0031a0	1491476at2759	Coiled-coil domain containing 189
TRINITY_DN93274_c0_g1_i1	sp|O57594|SURF6_TAKRU	O57594	GO:0005730; GO:0005634	Surfeit locus protein 6 homolog OS=Takifugu rubripes OX=31033 GN=surf6 PE=3 SV=1		7574_0:001088	1249614at2759	surfeit locus protein 6 homolog
TRINITY_DN9335_c1_g1_i4	sp|Q95029|CATL_DROME	Q95029	GO:0051603; GO:0008234; GO:0006955; GO:0016787; GO:0006508; GO:0007586; GO:0007275; GO:0005764; GO:0004197; GO:0008233; GO:0045169; GO:0005615	Cathepsin L OS=Drosophila melanogaster OX=7227 GN=Cp1 PE=2 SV=2	PF00112.23; PF03051.15	286706_0:0030dd	1275401at2759	Papain-like cysteine endopeptidase	R-DME-2132295; R-DME-8939242	MHC class II antigen presentation; RUNX1 regulates transcription of genes involved in differentiation of keratinocytes
TRINITY_DN93719_c0_g1_i1	sp|Q5RC69|DCTD_PONAB	Q5RC69	GO:0008270; GO:0009165; GO:0016787; GO:0004132; GO:0046872; GO:0006220; GO:0003824; GO:0008152; GO:0042802	Deoxycytidylate deaminase OS=Pongo abelii OX=9601 GN=DCTD PE=2 SV=1		225164_0:002eb8	1569973at2759	deoxycytidylate deaminase
TRINITY_DN9382_c0_g2_i2	sp|B9EJX3|VAFNB_MOUSE	B9EJX3	GO:0008150; GO:0005575; GO:0003674	Protein ATP6V1FNB OS=Mus musculus OX=10090 GN=ATp6v1fnb PE=2 SV=1	PF14886.6; PF10458.9; PF05621.11; PF15074.6	29159_0:005ac0	1598660at2759	uncharacterized protein LOC105608858
TRINITY_DN94165_c0_g1_i1	sp|P39872|RL3_BOVIN	P39872	GO:0003735; GO:0005737; GO:0000027; GO:0003723; GO:0022625; GO:0005634; GO:0006412; GO:0005840; GO:0005730	60S ribosomal protein L3 OS=Bos taurus OX=9913 GN=RPL3 PE=2 SV=2		29159_0:002330	3147at6447	60S ribosomal protein L3-like	R-BTA-156827; R-BTA-1799339; R-BTA-6791226; R-BTA-72689; R-BTA-72706; R-BTA-975956; R-BTA-975957	L13a-mediated translational silencing of Ceruloplasmin expression; SRP-dependent cotranslational protein targeting to membrane; Major pathway of rRNA processing in the nucleolus and cytosol; Formation of a pool of free 40S subunits; GTP hydrolysis and joining of the 60S ribosomal subunit; Nonsense Mediated Decay (NMD) independent of the Exon Junction Complex (EJC); Nonsense Mediated Decay (NMD) e…
TRINITY_DN94219_c0_g1_i1	sp|Q3T0V4|RS11_BOVIN	Q3T0V4	GO:0003735; GO:0022627; GO:0019843; GO:0003723; GO:0005840; GO:0006412	40S ribosomal protein S11 OS=Bos taurus OX=9913 GN=RPS11 PE=2 SV=3	PF00366.20; PF16205.5; PF06875.11	218467_0:0042f6	1325168at2759	40S ribosomal protein S11	R-BTA-156827; R-BTA-1799339; R-BTA-6791226; R-BTA-72649; R-BTA-72689; R-BTA-72702; R-BTA-72706; R-BTA-975956; R-BTA-975957	L13a-mediated translational silencing of Ceruloplasmin expression; SRP-dependent cotranslational protein targeting to membrane; Major pathway of rRNA processing in the nucleolus and cytosol; Translation initiation complex formation; Formation of a pool of free 40S subunits; Ribosomal scanning and start codon recognition; GTP hydrolysis and joining of the 60S ribosomal subunit; Nonsense Mediated D…
TRINITY_DN94221_c0_g1_i1	sp|Q9CWG9|BL1S2_MOUSE	Q9CWG9	GO:0055037; GO:0099078; GO:0032418; GO:0005765; GO:0008022; GO:0005856; GO:0005815; GO:0005737; GO:0048490; GO:0000930; GO:0005764; GO:0031083; GO:0016197; GO:0008089; GO:0005829; GO:0016020; GO:0008625; GO:0043015; GO:0031175; GO:0045893	Biogenesis of lysosome-related organelles complex 1 subunit 2 OS=Mus musculus OX=10090 GN=Bloc1s2 PE=1 SV=1		6573_0:0044cf	10506at6447	biogenesis of lysosome-related organelles complex 1 subunit 2-like
TRINITY_DN94455_c0_g1_i1	sp|Q9HAE3|EFCB1_HUMAN	Q9HAE3	GO:0005509; GO:0046872	EF-hand calcium-binding domain-containing protein 1 OS=Homo sapiens OX=9606 GN=EFCAB1 PE=2 SV=1	PF13405.6; PF13202.6; PF13499.6; PF13833.6; PF00036.32	7739_0:003476	1331864at2759	EF-hand calcium-binding domain-containing protein 1
TRINITY_DN9472_c1_g1_i3						50429_0:0045cc	18029at6101	uncharacterized protein LOC111340234
TRINITY_DN95_c1_g1_i3	sp|G3X987|GIMA9_MOUSE	G3X987	GO:0008150; GO:0000166; GO:0005829; GO:0005525	GTPase IMAP family member 9 OS=Mus musculus OX=10090 GN=Gimap9 PE=1 SV=1	PF04548.16; PF03193.16; PF01926.23; PF00350.23; PF00735.18; PF00009.27; PF02421.18	6565_0:00799d	1092873at2759	GTPase IMAP family member 4-like
TRINITY_DN95228_c0_g1_i1	sp|Q3SZV8|ROMO1_BOVIN	Q3SZV8	GO:0061844; GO:0031640; GO:2000379; GO:0005743; GO:0042742; GO:0005744; GO:0005739; GO:0050829; GO:0008284; GO:0016021; GO:0030150; GO:0034614; GO:0050830; GO:0003674; GO:0051838; GO:0090399; GO:0016020; GO:0045039	Reactive oxygen species modulator 1 OS=Bos taurus OX=9913 GN=ROMO1 PE=3 SV=1		294128_0:000756	1635599at2759	reactive oxygen species modulator 1
TRINITY_DN9552_c0_g1_i5	sp|Q8QGW7|LITAF_CHICK	Q8QGW7	GO:0008270; GO:0010008; GO:0005737; GO:0031901; GO:0005125; GO:0005886; GO:0046872; GO:0005794; GO:0016020; GO:0098559; GO:0003677; GO:0007165; GO:0005634; GO:0031902; GO:0000139; GO:0005765; GO:0005764; GO:0009898; GO:0001816; GO:0019953; GO:0098560; GO:0005768; GO:0098574	Lipopolysaccharide-induced tumor necrosis factor-alpha factor homolog OS=Gallus gallus OX=9031 GN=LITAF PE=2 SV=1	PF10601.9	6526_0:004338	10733at6447	LOW QUALITY PROTEIN: lipopolysaccharide-induced tumor necrosis factor-alpha factor homolog
TRINITY_DN9592_c0_g1_i1	sp|Q4R6I6|SRP09_MACFA	Q4R6I6	GO:0005786; GO:0008312; GO:0005737; GO:0006614; GO:0048500; GO:0003723; GO:0045900	Signal recognition particle 9 kDa protein OS=Macaca fascicularis OX=9541 GN=SRP9 PE=3 SV=1		29159_0:005d03	10797at6447	Signal recognition particle 9 kDa protein
TRINITY_DN96017_c0_g1_i1	sp|Q5FVF1|F10C1_RAT	Q5FVF1	GO:0016791; GO:0005634; GO:0016311	Protein FRA10AC1 homolog OS=Rattus norvegicus OX=10116 GN=Fra10ac1 PE=1 SV=1	PF18319.1; PF09725.9	7574_0:001e6b	1444601at2759	protein FRA10AC1
TRINITY_DN96251_c0_g1_i1	sp|Q2HJ27|MYC_BOVIN	Q2HJ27	GO:1904672; GO:0046983; GO:0003677; GO:0006355; GO:0009314; GO:0000978; GO:0005654; GO:0042981; GO:0005819; GO:0000981; GO:0005634; GO:0006919; GO:0008284; GO:0097193; GO:0006357; GO:0016604; GO:0005730; GO:0045893; GO:0003700	Myc proto-oncogene protein OS=Bos taurus OX=9913 GN=MYC PE=2 SV=1		7574_0:006062	376209at33208	myc proto-oncogene protein	R-BTA-5689880; R-BTA-8866911; R-BTA-9018519	Ub-specific processing proteases; TFAP2 (AP-2) family regulates transcription of cell cycle factors; Estrogen-dependent gene expression
TRINITY_DN96335_c0_g1_i1					PF17279.2; PF15191.6; PF18537.1; PF05701.11; PF09765.9; PF02996.17	6573_0:005826	1888937at2759	uncharacterized protein LOC110442796
TRINITY_DN9636_c0_g2_i2						106582_0:00369a	1233632at2759	Reverse transcriptase
TRINITY_DN96656_c0_g1_i1	sp|Q95LS7|CCD96_MACFA	Q95LS7	GO:0005815; GO:0005737; GO:0005856	Coiled-coil domain-containing protein 96 OS=Macaca fascicularis OX=9541 GN=CCDC96 PE=2 SV=1	PF10205.9; PF12205.8; PF13870.6; PF13851.6; PF15898.5; PF06009.12; PF08317.11; PF06156.13; PF02183.18; PF18595.1; PF04012.12	6573_0:0044b9	392779at33208	coiled-coil domain-containing protein 96
TRINITY_DN96716_c0_g1_i1	sp|A0A1B0GTD5|TEX49_HUMAN	A0A1B0GTD5		Testis-expressed protein 49 OS=Homo sapiens OX=9606 GN=TEX49 PE=4 SV=1	PF14886.6	29159_0:005756	1576034at2759	Testis expressed 49
TRINITY_DN96742_c0_g1_i1	sp|O44437|SMD3_DROME	O44437	GO:0003723; GO:0000387; GO:0045451; GO:0000243; GO:0005681; GO:0006396; GO:0071013; GO:0007517; GO:0006397; GO:0005634; GO:0030532; GO:0048477; GO:0071011; GO:0005685; GO:0034715; GO:0005682; GO:0005687; GO:0008380; GO:0030182; GO:0097526; GO:0005689; GO:0034719; GO:0005686	Small nuclear ribonucleoprotein Sm D3 OS=Drosophila melanogaster OX=7227 GN=SmD3 PE=1 SV=1	PF01423.22; PF17464.2	29159_0:0047a4	10364at6447	Small nuclear ribonucleoprotein Sm D3	R-DME-111367; R-DME-72163; R-DME-72165; R-DME-73856; R-DME-77588	SLBP independent Processing of Histone Pre-mRNAs; mRNA Splicing - Major Pathway; mRNA Splicing - Minor Pathway; RNA Polymerase II Transcription Termination; SLBP Dependent Processing of Replication-Dependent Histone Pre-mRNAs
TRINITY_DN969_c0_g1_i9						6565_0:006baa	10808at6447	uncharacterized protein LOC101857328
TRINITY_DN96916_c0_g1_i1	sp|Q4R5Y0|CK001_MACFA	Q4R5Y0	GO:0005634	UPF0686 protein C11orf1 homolog OS=Macaca fascicularis OX=9541 GN=QtsA-19889 PE=2 SV=1		6573_0:005593	1331053at2759	UPF0686 protein C11orf1 homolog
TRINITY_DN96943_c0_g1_i1	sp|Q2NKR1|TIM10_BOVIN	Q2NKR1	GO:0072321; GO:0005743; GO:0042719; GO:0042803; GO:0015031; GO:0051087; GO:0046872; GO:0140318; GO:0016020; GO:0005739; GO:0045039	Mitochondrial import inner membrane translocase subunit Tim10 OS=Bos taurus OX=9913 GN=TIMM10 PE=3 SV=1		37653_0:002d95	11028at6447	mitochondrial import inner membrane translocase subunit Tim10-B-like	R-BTA-1268020	Mitochondrial protein import
TRINITY_DN97252_c0_g1_i1	sp|Q1HPU2|TRMB_BOMMO	Q1HPU2	GO:0106004; GO:0032259; GO:0030488; GO:0003723; GO:0016740; GO:0006400; GO:0000049; GO:0005634; GO:0008033; GO:0008168; GO:0008176	tRNA (guanine-N(7)-)-methyltransferase OS=Bombyx mori OX=7091 PE=2 SV=1		6565_0:0006f6	1417652at2759	tRNA (guanine-N(7)-)-methyltransferase
TRINITY_DN9740_c0_g1_i3	sp|O16130|RL39_DROME	O16130	GO:0003735; GO:0005840; GO:0022625; GO:0006412; GO:0002181	60S ribosomal protein L39 OS=Drosophila melanogaster OX=7227 GN=RpL39 PE=1 SV=2		29159_0:0060ca	12188at1206795	uncharacterized protein LOC105321329	R-DME-156827; R-DME-1799339; R-DME-72689; R-DME-72706; R-DME-975956; R-DME-975957	L13a-mediated translational silencing of Ceruloplasmin expression; SRP-dependent cotranslational protein targeting to membrane; Formation of a pool of free 40S subunits; GTP hydrolysis and joining of the 60S ribosomal subunit; Nonsense Mediated Decay (NMD) independent of the Exon Junction Complex (EJC); Nonsense Mediated Decay (NMD) enhanced by the Exon Junction Complex (EJC)
TRINITY_DN9773_c0_g3_i1						6573_0:002ec8	1347426at2759	KIAA1958
TRINITY_DN97899_c0_g1_i1	sp|Q6B857|CFA20_BOVIN	Q6B857	GO:0036064; GO:0005856; GO:0005874; GO:2000253; GO:0060271; GO:0005654; GO:0005814; GO:0018095; GO:0031514; GO:0005634; GO:0005929; GO:0060296; GO:2000147	Cilia- and flagella-associated protein 20 OS=Bos taurus OX=9913 GN=CFAP20 PE=2 SV=1		10020_0:001212	1213295at2759	cilia- and flagella-associated protein 20
TRINITY_DN97960_c0_g1_i1	sp|A6QQ14|DPOE4_BOVIN	A6QQ14	GO:0005671; GO:0003677; GO:0005634; GO:0046982; GO:0008622	DNA polymerase epsilon subunit 4 OS=Bos taurus OX=9913 GN=POLE4 PE=3 SV=1	PF13285.6; PF15511.6; PF00125.24; PF02969.17; PF00808.23	29159_0:004140	11741at6447	DNA polymerase epsilon subunit 4-like	R-BTA-110314; R-BTA-174430; R-BTA-5651801; R-BTA-5656169; R-BTA-5685942; R-BTA-5696397; R-BTA-5696400; R-BTA-6782135; R-BTA-6782210; R-BTA-68952; R-BTA-68962	Recognition of DNA damage by PCNA-containing replication complex; Telomere C-strand synthesis initiation; PCNA-Dependent Long Patch Base Excision Repair; Termination of translesion DNA synthesis; HDR through Homologous Recombination (HRR); Gap-filling DNA repair synthesis and ligation in GG-NER; Dual Incision in GG-NER; Dual incision in TC-NER; Gap-filling DNA repair synthesis and ligation in TC-…
TRINITY_DN97975_c0_g1_i1	sp|Q9CQZ5|NDUA6_MOUSE	Q9CQZ5	GO:0070469; GO:0032981; GO:0005743; GO:0006979; GO:0031966; GO:0005747; GO:0003674; GO:0016020; GO:0005739	NADH dehydrogenase [ubiquinone] 1 alpha subcomplex subunit 6 OS=Mus musculus OX=10090 GN=Ndufa6 PE=1 SV=1		244447_0:003eb6	133155at7898	NADH dehydrogenase	R-MMU-611105; R-MMU-6799198	Respiratory electron transport; Complex I biogenesis
TRINITY_DN98000_c0_g1_i1	sp|P30683|GNAO_LYMST	P30683	GO:0007186; GO:0000166; GO:0019001; GO:0007165; GO:0031683; GO:0003924; GO:0046872; GO:0007188; GO:0005525	Guanine nucleotide-binding protein G(o) subunit alpha OS=Lymnaea stagnalis OX=6523 PE=2 SV=3		28612_0:0052a2	37190at7147	G protein alpha q subunit-like
TRINITY_DN98044_c0_g1_i1	sp|Q9CQP0|RM33_MOUSE	Q9CQP0	GO:0003735; GO:0005739; GO:0005840; GO:0005762; GO:0006412	39S ribosomal protein L33, mitochondrial OS=Mus musculus OX=10090 GN=Mrpl33 PE=1 SV=1		7460_0:00018e	10363at34735	39S ribosomal protein L33, mitochondrial	R-MMU-5389840; R-MMU-5419276	Mitochondrial translation elongation; Mitochondrial translation termination
TRINITY_DN9810_c0_g1_i4						29159_0:0021bf	1347426at2759	KIAA1958
TRINITY_DN98302_c0_g1_i1					PF05297.11; PF09073.10; PF04931.13; PF04147.12; PF02037.27
TRINITY_DN98538_c0_g1_i1	sp|Q5ZJJ8|UBCP1_CHICK	Q5ZJJ8	GO:0106306; GO:0016787; GO:0004721; GO:0005654; GO:0005634; GO:0004722; GO:0106307; GO:0006470; GO:0005730	Ubiquitin-like domain-containing CTD phosphatase 1 OS=Gallus gallus OX=9031 GN=UBLCP1 PE=2 SV=1		48498_0:0019b1	1376145at2759	ubiquitin-like domain-containing CTD phosphatase 1
TRINITY_DN98740_c0_g1_i1					PF06459.12
TRINITY_DN9886_c0_g1_i2					PF01402.21; PF05534.12; PF12411.8
TRINITY_DN99008_c0_g1_i1	sp|O35817|AKA14_RAT	O35817	GO:0007283; GO:0035686; GO:0005737; GO:0005930; GO:0034237; GO:0005952; GO:0051018	A-kinase anchor protein 14 OS=Rattus norvegicus OX=10116 GN=Akap14 PE=2 SV=1		29159_0:000556	1552956at2759	A-kinase anchor protein 14
TRINITY_DN99108_c0_g1_i1						66420_0:000ad0	101613at33392	adenosine deaminase-like protein
TRINITY_DN99768_c0_g1_i1						6573_0:00430a	19837at6447	uncharacterized protein LOC110463334
TRINITY_DN99930_c0_g1_i1						29159_0:001282	10778at6447	leucine-rich repeat-containing protein 51-like
TRINITY_DN0_c0_g3_i3	sp|Q9NFT7|HXK2_DROME	Q9NFT7	GO:0006013; GO:0001678; GO:0006096; GO:0051156; GO:0005739; GO:0046835; GO:0004340; GO:0005575; GO:0005829; GO:0019318; GO:0008865; GO:0006000; GO:0004396; GO:0019158; GO:0006006	Hexokinase type 2 OS=Drosophila melanogaster OX=7227 GN=Hex-t2 PE=2 SV=4	PF00349.21; PF03727.16	29159_0:004b9d	1153545at2759	Phosphotransferase	R-DME-170822; R-DME-70171	Regulation of Glucokinase by Glucokinase Regulatory Protein; Glycolysis
TRINITY_DN0_c12_g1_i1					PF10173.9; PF05597.11; PF12732.7; PF07439.11; PF07697.11; PF06103.11; PF07926.12
TRINITY_DN0_c12_g2_i4					PF06977.11; PF08450.12
TRINITY_DN0_c17_g1_i8					PF15470.6; PF01363.21; PF00643.24; PF13842.6	6565_0:004663	12443at6447	tripartite motif-containing protein 2
TRINITY_DN0_c4_g1_i1	sp|Q32PI5|2AAA_BOVIN	Q32PI5	GO:0065003; GO:0005694; GO:0016328; GO:0042995; GO:0005737; GO:0005886; GO:0005634; GO:0007059; GO:0030425; GO:0016020; GO:0000775; GO:0043666; GO:0019888	Serine/threonine-protein phosphatase 2A 65 kDa regulatory subunit A alpha isoform OS=Bos taurus OX=9913 GN=PPP2R1A PE=1 SV=1	PF12348.8; PF07571.13; PF13646.6; PF12830.7; PF11099.8; PF01602.20; PF13513.6; PF02985.22; PF12717.7; PF12755.7	6565_0:002771	1358at6447	serine/threonine-protein phosphatase 2A 65 kDa regulatory subunit A alpha isoform-like
TRINITY_DN0_c6_g2_i5	sp|P97363|SPTC2_MOUSE	P97363	GO:0046511; GO:0017059; GO:0016746; GO:1904504; GO:0005783; GO:0046512; GO:0016740; GO:0046513; GO:0006629; GO:0016021; GO:0004758; GO:0060612; GO:0016020; GO:0009058; GO:0006665; GO:0030170; GO:0030148	Serine palmitoyltransferase 2 OS=Mus musculus OX=10090 GN=Sptlc2 PE=1 SV=2	PF00155.21; PF01212.21; PF00266.19	6573_0:002b0a	2150at6447	serine palmitoyltransferase 2-like	R-MMU-1660661	Sphingolipid de novo biosynthesis
TRINITY_DN0_c7_g1_i3	sp|Q9WV92|E41L3_MOUSE	Q9WV92	GO:0005911; GO:0003779; GO:0005856; GO:0005198; GO:0030866; GO:0006915; GO:0031032; GO:0005737; GO:0033270; GO:0001558; GO:0005886; GO:0030054; GO:0008092; GO:0014069; GO:0016020; GO:0007010	Band 4.1-like protein 3 OS=Mus musculus OX=10090 GN=Epb41l3 PE=1 SV=1	PF01846.19; PF08736.11; PF00373.18; PF02216.16; PF09379.10; PF05902.13; PF09380.10	6565_0:000f81	12302at6447	band 4.1-like protein 3 isoform X1	R-MMU-6794361	Neurexins and neuroligins
TRINITY_DN100_c0_g1_i1					PF02822.14	29159_0:00405f	11377at6447	uncharacterized protein LOC105342959
TRINITY_DN10000_c1_g2_i6	sp|P46087|NOP2_HUMAN	P46087	GO:0008757; GO:0006364; GO:0042254; GO:0006396; GO:0070475; GO:0032259; GO:0003723; GO:0001510; GO:0009383; GO:0000470; GO:0005515; GO:0000027; GO:0016740; GO:1901796; GO:0005634; GO:0008284; GO:0008168; GO:0005730	Probable 28S rRNA (cytosine(4447)-C(5))-methyltransferase OS=Homo sapiens OX=9606 GN=NOP2 PE=1 SV=2	PF10500.9; PF01135.19; PF01189.17; PF17125.5; PF03602.15; PF01728.19; PF05764.13	6565_0:003da7	1528896at2759	RNA (C5-cytosine) methyltransferase	R-HSA-6790901; R-HSA-8869496	rRNA modification in the nucleus and cytosol; TFAP2A acts as a transcriptional repressor during retinoic acid induced cell differentiation
TRINITY_DN100008_c0_g1_i1					PF18181.1; PF07267.11
TRINITY_DN100009_c0_g1_i1						6565_0:001cd6	1194990at2759	A-kinase anchor protein 17A
TRINITY_DN10001_c0_g1_i2						29159_0:001153	1491900at2759	uncharacterized protein LOC111194453
TRINITY_DN100014_c0_g1_i1						37653_0:001bdc	1265at6447	Mitogen-activated protein kinase kinase kinase
TRINITY_DN100016_c0_g1_i1	sp|Q3TZ65|OD3L2_MOUSE	Q3TZ65	GO:0008150; GO:0003674; GO:0005856; GO:0005881	Outer dense fiber protein 3-like protein 2 OS=Mus musculus OX=10090 GN=Odf3l2 PE=2 SV=1	PF07004.12	6573_0:0038c0	532520at33208	outer dense fiber protein 3-like protein 2
TRINITY_DN100018_c0_g1_i1	sp|P82186|GUN_MYTED	P82186	GO:0016787; GO:0000272; GO:0008810; GO:0030245; GO:0016798; GO:0008152; GO:0005975	Endoglucanase OS=Mytilus edulis OX=6550 PE=1 SV=1		6565_0:0075b5	1405568at2759	glycoside hydrolase family 45 protein
TRINITY_DN10002_c0_g1_i3						6565_0:0004e7	14328at6447	uncharacterized protein LOC111114638
TRINITY_DN100028_c0_g1_i1						6573_0:002c3e	338532at33208	uncharacterized protein LOC105331104
TRINITY_DN100029_c0_g1_i1					PF00047.25; PF08205.12; PF13895.6; PF07679.16; PF13927.6; PF07654.15	6573_0:002ce3	21419at6447	uncharacterized protein LOC110441087
TRINITY_DN10003_c0_g1_i1	sp|A0JNA3|IMDH1_BOVIN	A0JNA3	GO:0006183; GO:0000166; GO:0006164; GO:0005737; GO:0046872; GO:0005634; GO:0003824; GO:0006177; GO:0003938; GO:0016491	Inosine-5'-monophosphate dehydrogenase 1 OS=Bos taurus OX=9913 GN=IMPDH1 PE=2 SV=2	PF03060.15; PF01207.17; PF00478.25; PF04131.14; PF00977.21; PF00571.28; PF01081.19; PF05690.14; PF01070.18; PF02581.17; PF01645.17	6565_0:006f5f	1673at6447	Inosine-5'-monophosphate dehydrogenase
TRINITY_DN10003_c1_g1_i5					PF10471.9
TRINITY_DN100036_c0_g1_i1	sp|Q6RG02|VIT_PENME	Q6RG02	GO:0008289; GO:0006869; GO:0045735; GO:0005575; GO:0005319; GO:0048477	Vitellogenin OS=Penaeus merguiensis OX=71412 PE=1 SV=2	PF08925.11; PF01347.22	29159_0:004850	1172at6447	apolipophorins-like
TRINITY_DN10004_c0_g1_i9					PF13908.6
TRINITY_DN100041_c0_g1_i1					PF04193.14	6573_0:0018d2	2081at6447	Sodium/myo-inositol cotransporter
TRINITY_DN100043_c0_g1_i1	sp|Q9VXV9|WCSD_DROME	Q9VXV9	GO:0008150; GO:0008146; GO:0005575; GO:0016021; GO:0003674; GO:0016020	WSCD family member CG9164 OS=Drosophila melanogaster OX=7227 GN=CG9164 PE=2 SV=1	PF13469.6; PF00685.27	133901_0:000872	102274at50557	WSCD family member CG9164
TRINITY_DN10005_c1_g1_i1	sp|Q91437|PYR1_SQUAC	Q91437	GO:0008270; GO:0000166; GO:0016787; GO:0005524; GO:0004070; GO:0016874; GO:0005737; GO:0006207; GO:0016740; GO:0004151; GO:0046872; GO:0005634; GO:0003824; GO:0008152; GO:0004088; GO:0044205; GO:0006221	CAD protein OS=Squalus acanthias OX=7797 GN=CAD PE=2 SV=1	PF00185.24; PF02729.21	225164_0:003300	15670at33208	carbamoyl-phosphate synthase
TRINITY_DN100050_c0_g1_i1						10224_0:0020b7	12525at33208	uncharacterized protein LOC109476567
TRINITY_DN100052_c0_g1_i1	sp|B3EWZ5|MLRP1_ACRMI	B3EWZ5	GO:0016020; GO:0005576	MAM and LDL-receptor class A domain-containing protein 1 (Fragment) OS=Acropora millepora OX=45264 PE=1 SV=1		6565_0:000b86	27at6447	Low-density lipoprotein (LDL) receptor class A, conserved site
TRINITY_DN100064_c0_g1_i1	sp|Q96MY1|NOL4L_HUMAN	Q96MY1	GO:0005654; GO:0005515; GO:0005829	Nucleolar protein 4-like OS=Homo sapiens OX=9606 GN=NOL4L PE=1 SV=2	PF04889.12; PF09026.10; PF03153.13; PF14812.6	6500_0:003997	1009964at2759	nucleolar protein 4-like
TRINITY_DN100069_c0_g1_i1						6500_0:0004c2	1459032at2759	Band 7 domain
TRINITY_DN10007_c0_g1_i1	sp|P98068|SPAN_STRPU	P98068	GO:0008270; GO:0008237; GO:0016787; GO:0006508; GO:0007275; GO:0008233; GO:0046872; GO:0004222	Protein SpAN OS=Strongylocentrotus purpuratus OX=7668 GN=SPAN PE=2 SV=1	PF00413.24; PF01400.24; PF00431.20; PF00059.21	6573_0:00078e	472790at33208	Metalloendopeptidase
TRINITY_DN100070_c0_g1_i1	sp|Q9D0S4|NEUL2_MOUSE	Q9D0S4	GO:0030891; GO:0005737; GO:0016567; GO:0005515; GO:0035556; GO:0045214; GO:0005927; GO:0030239; GO:0061630	Neuralized-like protein 2 OS=Mus musculus OX=10090 GN=Neurl2 PE=1 SV=1	PF07525.16; PF08710.10; PF07177.12	6573_0:000916	1185754at2759	neuralized-like protein 2	R-MMU-8951664	Neddylation
TRINITY_DN100072_c0_g1_i1	sp|Q2KIX7|HP251_BOVIN	Q2KIX7	GO:0005581; GO:0005576	Protein HP-25 homolog 1 OS=Bos taurus OX=9913 PE=1 SV=1	PF00386.21	6565_0:000359	1258047at2759	otolin-1
TRINITY_DN100073_c0_g1_i1	sp|P35187|SGS1_YEAST	P35187	GO:0005694; GO:0000166; GO:0016787; GO:0003676; GO:0004386; GO:0005524; GO:0005737; GO:0044237; GO:0006268; GO:0006281; GO:0032508; GO:0000724; GO:0009378; GO:0005634; GO:0006260; GO:0006310; GO:0043138; GO:0031422	ATP-dependent helicase SGS1 OS=Saccharomyces cerevisiae (strain ATCC 204508 / S288c) OX=559292 GN=SGS1 PE=1 SV=1	PF07652.14; PF00270.29; PF00176.23; PF04851.15	29159_0:005f63	18017at6447	uncharacterized protein LOC110440673
TRINITY_DN10008_c0_g1_i1	sp|Q5TM62|RT18B_MACMU	Q5TM62	GO:0003735; GO:0005763; GO:0005654; GO:0032543; GO:0030054; GO:0005739; GO:0005840; GO:0006412	28S ribosomal protein S18b, mitochondrial OS=Macaca mulatta OX=9544 GN=MRPS18B PE=3 SV=1	PF01084.20	64838_0:0017b0	1023024at2759	28S ribosomal protein S18b, mitochondrial
TRINITY_DN100083_c0_g1_i1						8090_0:00197d	1135476at2759	Predicted protein
TRINITY_DN100084_c0_g1_i1	sp|O23755|EF2_BETVU	O23755	GO:0000166; GO:0006414; GO:0005737; GO:0003924; GO:0003746; GO:0006412; GO:0005525	Elongation factor 2 OS=Beta vulgaris OX=161934 PE=2 SV=1		35525_0:003a0b	13367at6656	116 kDa U5 small nuclear ribonucleoprotein component
TRINITY_DN100088_c0_g1_i1						37621_0:002dfe	379156at33208	uncharacterized protein LOC106817733
TRINITY_DN10009_c0_g1_i2	sp|P26016|FUR11_DROME	P26016	GO:0008039; GO:0097090; GO:0008236; GO:0016787; GO:0006508; GO:0097688; GO:0005802; GO:0001941; GO:0016021; GO:0005886; GO:0016486; GO:0008233; GO:0005794; GO:0030173; GO:0016485; GO:0016020; GO:0004252; GO:0000139	Furin-like protease 1, isoforms 1/1-X/2 OS=Drosophila melanogaster OX=7227 GN=Fur1 PE=2 SV=2	PF01483.20; PF15116.6; PF00082.22; PF01683.18	199890_0:00075f	12785at7147	Peptidase S8, pro-domain	R-DME-159782	Removal of aminoterminal propeptides from gamma-carboxylated proteins
TRINITY_DN100092_c0_g1_i1	sp|P39086|GRIK1_HUMAN	P39086	GO:0038023; GO:0035249; GO:0015277; GO:0034220; GO:0045211; GO:0051966; GO:0008066; GO:0050804; GO:0015276; GO:0035235; GO:0005886; GO:0004970; GO:1904315; GO:0060078	Glutamate receptor ionotropic, kainate 1 OS=Homo sapiens OX=9606 GN=GRIK1 PE=1 SV=1	PF00060.26; PF00497.20; PF10613.9	6573_0:002073	188544at2759	Glutamate receptor	R-HSA-451307; R-HSA-451308	Activation of Na-permeable kainate receptors; Activation of Ca-permeable Kainate Receptor
TRINITY_DN100094_c0_g1_i1					PF01080.17; PF09073.10; PF03522.15; PF08658.10; PF18004.1; PF14153.6; PF02535.22	29159_0:005cfb	132723at2759	claspin
TRINITY_DN100099_c0_g1_i1						6565_0:0026c1	10423at6447	uncharacterized protein LOC101852861
TRINITY_DN10010_c0_g1_i2					PF13833.6; PF13405.6; PF13202.6; PF00036.32; PF00682.19	133434_0:003c3e	390847at33208	uncharacterized protein LOC110051817
TRINITY_DN100108_c0_g1_i1	sp|Q02440|MYO5A_CHICK	Q02440	GO:0031982; GO:0003779; GO:0072659; GO:0000166; GO:0007015; GO:0051015; GO:0060001; GO:0005524; GO:0030050; GO:0005737; GO:0016192; GO:0000146; GO:0031941; GO:0016459; GO:0005515; GO:0005794; GO:0015629; GO:0030898; GO:0016020; GO:0005516; GO:0000139	Unconventional myosin-Va OS=Gallus gallus OX=9031 GN=MYO5A PE=1 SV=1		6573_0:000a65	167at6447	unconventional myosin-Va-like
TRINITY_DN10011_c0_g1_i6	sp|Q32LH7|NB5R4_BOVIN	Q32LH7	GO:0004128; GO:0071949; GO:0048471; GO:0042593; GO:0020037; GO:0005783; GO:0006091; GO:0016174; GO:0016653; GO:0006801; GO:0030073; GO:0046677; GO:0072593; GO:0046872; GO:0048468; GO:0016491	Cytochrome b5 reductase 4 OS=Bos taurus OX=9913 GN=CYB5R4 PE=2 SV=1	PF00175.21; PF08030.12; PF00970.24; PF00173.28; PF04969.16	6565_0:005c7d	1311668at2759	NADH-cytochrome b5 reductase
TRINITY_DN10012_c0_g1_i2	sp|O60140|YNS9_SCHPO	O60140	GO:0008270; GO:0006511; GO:0005737; GO:0016567; GO:0046872; GO:0005634; GO:0061630	Uncharacterized protein C18H10.09 OS=Schizosaccharomyces pombe (strain 972 / ATCC 24843) OX=284812 GN=SPBC18H10.09 PE=4 SV=2	PF18044.1; PF09026.10; PF00642.24; PF05495.12; PF16131.5; PF14608.6; PF18345.1	225164_0:003d6d	373807at33208	Zinc finger, CHY-type
TRINITY_DN100120_c0_g1_i1						37621_0:002823
TRINITY_DN100126_c0_g1_i1	sp|A8XF54|CUP4_CAEBR	A8XF54	GO:0005230; GO:0016021; GO:0050877; GO:0005887; GO:1901046; GO:0061771; GO:0034220; GO:0007165; GO:0022848; GO:0045202; GO:0031410; GO:1901562; GO:0007268; GO:0043005; GO:0004888; GO:0006897; GO:0030594; GO:0008340; GO:0030659; GO:0042391; GO:0006811; GO:0005216; GO:0030100	Acetylcholine receptor-like protein cup-4 OS=Caenorhabditis briggsae OX=6238 GN=cup-4 PE=3 SV=2		6573_0:0016dd	13963at6447	Neurotransmitter-gated ion-channel
TRINITY_DN100129_c0_g1_i1						6565_0:0039d6	280at6447	transient receptor potential cation channel subfamily M member 1-like
TRINITY_DN10014_c0_g1_i3	sp|O62836|ZFX_BOVIN	O62836	GO:0009566; GO:0009791; GO:0003677; GO:0006355; GO:0007283; GO:0000978; GO:0007281; GO:0060746; GO:0001541; GO:0000981; GO:0035264; GO:0048872; GO:0046872; GO:0005634; GO:0006357; GO:0048599	Zinc finger X-chromosomal protein OS=Bos taurus OX=9913 GN=ZFX PE=2 SV=2		7739_0:00196b	1620156at2759	Zinc finger C2H2 superfamily
TRINITY_DN100143_c0_g1_i1						70779_0:000874	13885at6101	interferon-inducible GTPase 5-like
TRINITY_DN10015_c0_g2_i1	sp|Q76IQ3|TY3H_CANLF	Q76IQ3	GO:0016714; GO:0042423; GO:0042416; GO:0048471; GO:0005737; GO:0042136; GO:0004497; GO:0005506; GO:0046872; GO:1990384; GO:0004511; GO:0016491; GO:0009072	Tyrosine 3-monooxygenase OS=Canis lupus familiaris OX=9615 GN=TH PE=2 SV=1	PF06692.11	6565_0:005760	2990at6447	tyrosine 3-monooxygenase-like
TRINITY_DN100155_c0_g1_i1						29159_0:000495	46660at33208	signal peptide, CUB and EGF-like domain-containing protein 3 isoform X1
TRINITY_DN100156_c0_g1_i1	sp|Q9YGL3|NR2E1_ORYLA	Q9YGL3	GO:0008270; GO:0000122; GO:0003677; GO:0006355; GO:0030522; GO:0000978; GO:0007275; GO:0003700; GO:0030154; GO:0046872; GO:0005634; GO:0048856; GO:0006357; GO:0004879; GO:0043565	Nuclear receptor subfamily 2 group E member 1 OS=Oryzias latipes OX=8090 GN=nr2e1 PE=2 SV=1	PF00104.30	29159_0:002b20	373206at33208	nuclear receptor subfamily 2 group E member 1
TRINITY_DN10017_c0_g1_i4	sp|O95479|G6PE_HUMAN	O95479	GO:0043231; GO:0047936; GO:0016787; GO:0005783; GO:0005737; GO:0005975; GO:0016614; GO:0006098; GO:0016491; GO:0006739; GO:0097305; GO:0003824; GO:0050661; GO:0005739; GO:0008152; GO:0030246; GO:0017057; GO:0006006; GO:0004345	GDH/6PGL endoplasmic bifunctional protein OS=Homo sapiens OX=9606 GN=H6PD PE=1 SV=2	PF02781.16; PF01182.20; PF15067.6; PF00479.22	6573_0:000efb	205418at33208	Glucose-6-phosphate 1-dehydrogenase
TRINITY_DN100170_c0_g1_i1	sp|Q6IFT6|ANO7_RAT	Q6IFT6	GO:0055085; GO:0046983; GO:0006821; GO:0017128; GO:0006869; GO:0061591; GO:0005783; GO:0061590; GO:0061589; GO:0016021; GO:0061588; GO:0005886; GO:1902476; GO:0005634; GO:0016020; GO:0005229; GO:0005254	Anoctamin-7 OS=Rattus norvegicus OX=10116 GN=Ano7 PE=2 SV=1	PF04547.12	7574_0:003554	1263362at2759	Anoctamin	R-RNO-2672351	Stimuli-sensing channels
TRINITY_DN100179_c0_g1_i1	sp|P53014|MLE_CAEEL	P53014	GO:0016459; GO:0005509; GO:0005863	Myosin, essential light chain OS=Caenorhabditis elegans OX=6239 GN=mlc-3 PE=4 SV=1	PF13405.6; PF10078.9; PF13499.6; PF13833.6; PF00036.32	407821_0:003179	134752at6656	Myosin-2 essential light chain	R-CEL-445355	Smooth Muscle Contraction
TRINITY_DN100193_c0_g1_i1	sp|Q14DH7|ACSS3_MOUSE	Q14DH7	GO:0043231; GO:0003987; GO:0050218; GO:0008150; GO:0005524; GO:0005759; GO:0005739; GO:0047760	Acyl-CoA synthetase short-chain family member 3, mitochondrial OS=Mus musculus OX=10090 GN=Acss3 PE=1 SV=2	PF16325.5; PF00501.28; PF16177.5	29159_0:0038ae	148550at33208	Acetyl-coenzyme A synthetase	R-MMU-77111	Synthesis of Ketone Bodies
TRINITY_DN100195_c0_g1_i1	sp|P07572|POL_MPMV	P07572	GO:0008270; GO:0016787; GO:0005198; GO:0006508; GO:0019012; GO:0004170; GO:0015074; GO:0003676; GO:0004523; GO:0004190; GO:0016032; GO:0016779; GO:0008233; GO:0016740; GO:0003964; GO:0004518; GO:0090502; GO:0046872; GO:0006278; GO:0090305	Gag-Pro-Pol polyprotein OS=Mason-Pfizer monkey virus OX=11855 GN=gag-pro-pol PE=1 SV=2		56723_0:0057bc	141134at7742	uncharacterized protein K02A2.6-like
TRINITY_DN100198_c0_g1_i1						88015_0:00082c	1104860at2759	BMP-binding endothelial regulator protein
TRINITY_DN100199_c0_g1_i1					PF11083.8; PF12443.8
TRINITY_DN1002_c0_g1_i6	sp|Q99816|TS101_HUMAN	Q99816	GO:0039702; GO:0043162; GO:0005768; GO:0000813; GO:0005737; GO:0016236; GO:0031625; GO:0015031; GO:0042059; GO:0006858; GO:0097352; GO:0005515; GO:0048306; GO:0051301; GO:0006464; GO:0005771; GO:0043130; GO:0036258; GO:0007049	Tumor susceptibility gene 101 protein OS=Homo sapiens OX=9606 GN=TSG101 PE=1 SV=2	PF09454.10; PF03961.13; PF16159.5; PF04906.13; PF17436.2; PF05696.11; PF00179.26; PF05743.13; PF09726.9; PF08286.11	29159_0:002b62	1435538at2759	tumor susceptibility gene 101 protein	R-HSA-162588; R-HSA-174490; R-HSA-917729; R-HSA-9615710	Budding and maturation of HIV virion; Membrane binding and targetting of GAG proteins; Endosomal Sorting Complex Required For Transport (ESCRT); Microautophagy
TRINITY_DN1002_c0_g2_i2	sp|Q99816|TS101_HUMAN	Q99816	GO:0039702; GO:0043162; GO:0005768; GO:0000813; GO:0005737; GO:0016236; GO:0031625; GO:0015031; GO:0042059; GO:0006858; GO:0097352; GO:0005515; GO:0048306; GO:0051301; GO:0006464; GO:0005771; GO:0043130; GO:0036258; GO:0007049	Tumor susceptibility gene 101 protein OS=Homo sapiens OX=9606 GN=TSG101 PE=1 SV=2	PF13920.6; PF09332.11; PF05743.13; PF14447.6	29159_0:00153e	1435538at2759	tumor susceptibility gene 101 protein	R-HSA-162588; R-HSA-174490; R-HSA-917729; R-HSA-9615710	Budding and maturation of HIV virion; Membrane binding and targetting of GAG proteins; Endosomal Sorting Complex Required For Transport (ESCRT); Microautophagy
TRINITY_DN1002_c1_g1_i8	sp|P03360|POL_AVIRE	P03360	GO:0075713; GO:0003677; GO:0016787; GO:0006508; GO:0003676; GO:0004523; GO:0015074; GO:0003723; GO:0004190; GO:0003887; GO:0003964; GO:0003824; GO:0046718; GO:0071897; GO:0090502; GO:0006278; GO:0006310; GO:0090305	Gag-Pol polyprotein (Fragment) OS=Avian reticuloendotheliosis virus OX=11636 GN=pol PE=1 SV=2	PF00665.26; PF17921.1; PF11283.8; PF13683.6	30732_0:005918	195413at33208	uncharacterized protein K02A2.6-like
TRINITY_DN1002_c1_g2_i1	sp|P04323|POL3_DROME	P04323	GO:0016787; GO:0003676; GO:0016779; GO:0006508; GO:0015074; GO:0016740; GO:0004519; GO:0004190; GO:0008233; GO:0003964; GO:0004518; GO:0006278; GO:0090305	Retrovirus-related Pol polyprotein from transposon 17.6 OS=Drosophila melanogaster OX=7227 GN=pol PE=4 SV=1	PF00078.27; PF09358.10	8083_0:001789	195413at33208	uncharacterized protein K02A2.6-like
TRINITY_DN100201_c0_g1_i1	sp|Q5H8C1|FREM1_HUMAN	Q5H8C1	GO:0007154; GO:0097094; GO:0007275; GO:0007155; GO:0005576; GO:0016021; GO:0005515; GO:0046872; GO:0005604; GO:0007160; GO:0030246	FRAS1-related extracellular matrix protein 1 OS=Homo sapiens OX=9606 GN=FREM1 PE=1 SV=3	PF17803.1; PF09078.11; PF16184.5	6573_0:002731	13258at2759	FRAS1-related extracellular matrix protein 1
TRINITY_DN100205_c0_g1_i1					PF06954.11; PF15913.5; PF00757.20	29159_0:006e49	511370at33208	proprotein convertase subtilisin/kexin type 5-like
TRINITY_DN100218_c0_g1_i1	sp|A1Z9R4|ZN423_DROME	A1Z9R4	GO:0003677; GO:0045892; GO:0035277; GO:0007275; GO:0046872; GO:0005634; GO:0006357; GO:0045893	Zinc finger protein 423 homolog OS=Drosophila melanogaster OX=7227 GN=Oaz PE=2 SV=2		7168_0:001bef	1318335at2759	Zinc finger C2H2 superfamily
TRINITY_DN100225_c0_g1_i1						8187_0:00461f	112926at7742	Polypeptide N-acetylgalactosaminyltransferase
TRINITY_DN10023_c0_g1_i1	sp|Q58EN8|VP33B_DANRE	Q58EN8	GO:0005765; GO:0016192; GO:0007275; GO:0015031; GO:0006886; GO:0005764; GO:0033263; GO:0035622; GO:0003674; GO:0031902; GO:0005768; GO:0016020	Vacuolar protein sorting-associated protein 33B OS=Danio rerio OX=7955 GN=vps33b PE=2 SV=1	PF00995.23	6565_0:0035b7	3557at6447	Sec1-like protein
TRINITY_DN100234_c0_g1_i1					PF04272.14
TRINITY_DN100249_c0_g1_i1	sp|Q9QZW9|MNX1_MOUSE	Q9QZW9	GO:0009791; GO:0031016; GO:0003677; GO:0060541; GO:0005654; GO:0021675; GO:0021904; GO:0001764; GO:0021520; GO:0048667; GO:0030182; GO:0060539; GO:0021953; GO:1990837; GO:0031018; GO:0005634; GO:0005829; GO:0008045; GO:0006357; GO:0048812; GO:0005730	Motor neuron and pancreas homeobox protein 1 OS=Mus musculus OX=10090 GN=Mnx1 PE=2 SV=2	PF02535.22; PF09538.10; PF08880.11; PF00046.29	6573_0:005909	10848at6447	motor neuron and pancreas homeobox protein 1-like
TRINITY_DN10026_c0_g1_i3					PF06953.11; PF08088.12; PF01436.21	6573_0:00227d	1140368at2759	RBR-type E3 ubiquitin transferase
TRINITY_DN100264_c0_g1_i1	sp|Q9VUY0|MOX11_DROME	Q9VUY0	GO:0005615; GO:0016715; GO:0030667; GO:0008150; GO:0042421; GO:0006589; GO:0005576; GO:0004497; GO:0005575; GO:0046872; GO:0003674; GO:0004500; GO:0003824; GO:0005507; GO:0042420; GO:0016491	MOXD1 homolog 1 OS=Drosophila melanogaster OX=7227 GN=CG5235 PE=2 SV=2		6565_0:00156e	1493133at2759	Copper type II, ascorbate-dependent monooxygenase, N-terminal
TRINITY_DN100267_c0_g1_i1					PF13620.6
TRINITY_DN100270_c0_g1_i1	sp|Q9VFP2|RDX_DROME	Q9VFP2	GO:0007367; GO:0045732; GO:0042803; GO:0051865; GO:0007275; GO:0005737; GO:0031625; GO:0016567; GO:0031648; GO:0043161; GO:0070936; GO:1901044; GO:0005634; GO:0042308; GO:0045879; GO:0031463; GO:0030162	Protein roadkill OS=Drosophila melanogaster OX=7227 GN=rdx PE=1 SV=2	PF00917.26	6565_0:000a59	247596at33208	speckle-type POZ protein	R-DME-216167; R-DME-5632684	Nuclear CI is degraded; Hedgehog 'on' state
TRINITY_DN100271_c0_g1_i1	sp|Q92538|GBF1_HUMAN	Q92538	GO:0006895; GO:0080025; GO:0070973; GO:1903409; GO:0005793; GO:0097111; GO:1903420; GO:0034067; GO:0002263; GO:0030593; GO:0006890; GO:0061162; GO:0042147; GO:0007346; GO:0031252; GO:0090166; GO:0005515; GO:0005547; GO:2000008; GO:0005801; GO:0005802; GO:0048205; GO:0007030	Golgi-specific brefeldin A-resistance guanine nucleotide exchange factor 1 OS=Homo sapiens OX=9606 GN=GBF1 PE=1 SV=2	PF06299.12; PF12783.7	29159_0:003d70	198at6447	LOW QUALITY PROTEIN: Golgi-specific brefeldin A-resistance guanine nucleotide exchange factor 1-like	R-HSA-199992; R-HSA-5620916; R-HSA-6807878; R-HSA-6811434	trans-Golgi Network Vesicle Budding; VxPx cargo-targeting to cilium; COPI-mediated anterograde transport; COPI-dependent Golgi-to-ER retrograde traffic
TRINITY_DN10029_c0_g1_i1	sp|Q9EQN5|SMBP2_RAT	Q9EQN5	GO:0003678; GO:0000166; GO:0003677; GO:0000122; GO:0005524; GO:0005737; GO:0008134; GO:0003723; GO:0008186; GO:0032574; GO:0003724; GO:0005634; GO:0000977; GO:0030426; GO:0042802; GO:1990955; GO:0043025	DNA-binding protein SMUBP-2 OS=Rattus norvegicus OX=10116 GN=Ighmbp2 PE=1 SV=1	PF02602.15; PF00437.20; PF13086.6; PF13245.6; PF09848.9; PF07728.14; PF13514.6; PF05707.12; PF13191.6; PF01424.22; PF02562.16; PF13087.6; PF00004.29; PF13671.6; PF01695.17; PF07652.14; PF03796.15; PF13401.6; PF13538.6; PF00270.29; PF00580.21; PF05970.14; PF05127.14; PF00005.27; PF04851.15; PF01428.16; PF01443.18; PF13604.6; PF13481.6; PF01656.23	6565_0:002660	1371at6447	DNA-binding protein SMUBP-2-like
TRINITY_DN100291_c0_g1_i1	sp|Q149N8|SHPRH_HUMAN	Q149N8	GO:0000786; GO:0000166; GO:0003677; GO:0016787; GO:0005654; GO:0004386; GO:0005524; GO:0004842; GO:0016567; GO:0031625; GO:0006281; GO:0016740; GO:0005515; GO:0046872; GO:0006974; GO:0000209; GO:0006334; GO:0061630	E3 ubiquitin-protein ligase SHPRH OS=Homo sapiens OX=9606 GN=SHPRH PE=1 SV=2		7741_0:002ab0	110877at33208	E3 ubiquitin-protein ligase SHPRH	R-HSA-8866654	E3 ubiquitin ligases ubiquitinate target proteins
TRINITY_DN100297_c0_g1_i1						29159_0:005879	1319137at2759	Jacalin-like lectin domain
TRINITY_DN100300_c0_g1_i1	sp|Q9VX91|UBR1_DROME	Q9VX91	GO:0008270; GO:0004842; GO:0005737; GO:0016567; GO:0030163; GO:0016740; GO:0046872; GO:0061630; GO:0000151; GO:0071596	E3 ubiquitin-protein ligase UBR1 OS=Drosophila melanogaster OX=7227 GN=Ubr1 PE=2 SV=2		13037_0:0027ab	326at37572	E3 ubiquitin-protein ligase UBR1	R-DME-983168	Antigen processing: Ubiquitination & Proteasome degradation
TRINITY_DN10031_c0_g1_i1					PF14854.6	6565_0:000dd5	10781at6447	uncharacterized protein LOC111121219
TRINITY_DN100310_c0_g1_i1					PF00787.24
TRINITY_DN100318_c0_g1_i1						7868_0:002728	323806at2759	fibrocystin-L
TRINITY_DN100321_c0_g1_i1					PF01580.18; PF00196.19; PF13516.6; PF08477.13; PF00560.33; PF14580.6; PF07453.13; PF13855.6; PF13306.6; PF12799.7; PF00503.20	6500_0:0015b1	1013039at2759	malignant fibrous histiocytoma-amplified sequence 1
TRINITY_DN100329_c0_g1_i1						6565_0:00628b	1094723at2759	Centrosomal protein 83
TRINITY_DN10033_c0_g1_i4	sp|Q5FWF5|ESCO1_HUMAN	Q5FWF5	GO:0008270; GO:0016746; GO:0005694; GO:0007062; GO:0000785; GO:0018394; GO:0034421; GO:0016740; GO:0061733; GO:0046872; GO:0005634; GO:0008080; GO:0016407; GO:0006275; GO:0018215; GO:0007049	N-acetyltransferase ESCO1 OS=Homo sapiens OX=9606 GN=ESCO1 PE=1 SV=3	PF00583.25; PF13878.6; PF11827.8; PF13508.7; PF13880.6; PF13302.7; PF13673.7	6573_0:004d88	1138803at2759	N-acetyltransferase ESCO, acetyl-transferase domain	R-HSA-2468052	Establishment of Sister Chromatid Cohesion
TRINITY_DN10033_c1_g1_i1					PF04198.13	29159_0:006e7e	51211at33208	E3 ubiquitin-protein ligase RBBP6 isoform X1
TRINITY_DN10033_c4_g1_i1						6573_0:003e2b	113at6447	dynein heavy chain 17, axonemal-like
TRINITY_DN100333_c0_g1_i1	sp|G3X987|GIMA9_MOUSE	G3X987	GO:0008150; GO:0000166; GO:0005829; GO:0005525	GTPase IMAP family member 9 OS=Mus musculus OX=10090 GN=Gimap9 PE=1 SV=1	PF04548.16; PF03193.16; PF01580.18; PF12775.7; PF01926.23; PF00350.23; PF00735.18; PF00009.27; PF12846.7; PF02421.18; PF09439.10	6565_0:00610b	1092873at2759	GTPase IMAP family member 4-like
TRINITY_DN100338_c0_g1_i1						438503_0:0013c2	106862at6960	ran-specific GTPase-activating protein-like
TRINITY_DN10034_c0_g2_i2						48498_0:001e29	536040at33208	calcium-responsive transcription factor-like
TRINITY_DN100344_c0_g1_i1						6565_0:004bc0	1275401at2759	Papain-like cysteine endopeptidase
TRINITY_DN100356_c0_g1_i1	sp|Q948R0|CML5_ORYSJ	Q948R0	GO:0005509; GO:0046872	Calmodulin-like protein 5 OS=Oryza sativa subsp. japonica OX=39947 GN=CML5 PE=2 SV=1		83485_0:001adf	115766at33392	caltractin
TRINITY_DN100358_c0_g1_i1	sp|Q18163|DDRA_CAEEL	Q18163	GO:0005524; GO:0016021; GO:0005886; GO:0007399; GO:0016020; GO:0018108; GO:0030424; GO:0005887; GO:0033674; GO:0006468; GO:0008045; GO:0007169; GO:0038062; GO:0038063; GO:0004672; GO:0007275; GO:0042995; GO:0005518; GO:0048680; GO:0000166; GO:0043204; GO:0043235; GO:0004714	Discoidin domain-containing receptor A OS=Caenorhabditis elegans OX=6239 GN=ddr-1 PE=2 SV=3		6565_0:00227f	122892at33208	discoidin domain-containing receptor 2	R-CEL-3000171	Non-integrin membrane-ECM interactions
TRINITY_DN10036_c0_g4_i3					PF05903.14; PF04970.13	1720309_0:001e3e	1602481at2759	lecithin retinol acyltransferase
TRINITY_DN100366_c0_g1_i1	sp|A0JP86|LAMC1_XENTR	A0JP86	GO:0009888; GO:0007155; GO:0005576; GO:0005201; GO:0005604; GO:0016477; GO:0034446; GO:0009887	Laminin subunit gamma-1 OS=Xenopus tropicalis OX=8364 GN=lamc1 PE=2 SV=1	PF18251.1; PF00053.24; PF14283.6	225164_0:0055c7	1503826at2759	uncharacterized protein LOC105321914	R-XTR-3000157; R-XTR-381426; R-XTR-8874081; R-XTR-8957275	Laminin interactions; Regulation of Insulin-like Growth Factor (IGF) transport and uptake by Insulin-like Growth Factor Binding Proteins (IGFBPs); MET activates PTK2 signaling; Post-translational protein phosphorylation
TRINITY_DN100374_c0_g1_i1						6573_0:0055df	2600at6447	Myotubularin-related protein 14
TRINITY_DN100375_c0_g1_i1	sp|O60140|YNS9_SCHPO	O60140	GO:0008270; GO:0006511; GO:0005737; GO:0016567; GO:0046872; GO:0005634; GO:0061630	Uncharacterized protein C18H10.09 OS=Schizosaccharomyces pombe (strain 972 / ATCC 24843) OX=284812 GN=SPBC18H10.09 PE=4 SV=2		6500_0:004865	373807at33208	Zinc finger, CHY-type
TRINITY_DN10038_c0_g1_i2	sp|H3BPM6|MKROS_HUMAN	H3BPM6		MKRN2 opposite strand protein OS=Homo sapiens OX=9606 GN=MKRN2OS PE=4 SV=1	PF10280.9; PF08317.11; PF15905.5; PF03836.15; PF18595.1; PF01920.20	6573_0:004aa2	1134473at2759	MKRN2 opposite strand protein
TRINITY_DN100381_c0_g1_i1	sp|P04464|CALM_WHEAT	P04464	GO:0005509; GO:0005737; GO:0046872; GO:0019904	Calmodulin OS=Triticum aestivum OX=4565 PE=1 SV=3		218467_0:0037b8	137073at6656	EF-hand domain
TRINITY_DN100382_c0_g1_i1					PF09279.11; PF11544.8; PF00831.23; PF05008.15	6573_0:005770	143at6447	unconventional myosin-X-like
TRINITY_DN100391_c0_g1_i1	sp|Q91XS8|ST17B_RAT	Q91XS8	GO:0046777; GO:0005524; GO:0004672; GO:0004674; GO:0006915; GO:0006468; GO:0015629; GO:2000271; GO:0005634; GO:0005515; GO:0035556; GO:0043065	Serine/threonine-protein kinase 17B OS=Rattus norvegicus OX=10116 GN=Stk17b PE=1 SV=1		6573_0:0034c4	1156450at2759	serine/threonine-protein kinase 17B
TRINITY_DN100393_c0_g1_i1	sp|P13944|COCA1_CHICK	P13944	GO:0005581; GO:0062023; GO:0007155; GO:0005576; GO:0035987; GO:0005615	Collagen alpha-1(XII) chain OS=Gallus gallus OX=9031 GN=COL12A1 PE=1 SV=3		29159_0:003a6c	1049829at2759	collagen alpha-6(VI) chain
TRINITY_DN100394_c0_g1_i1						6573_0:002364	12988at6447	low-density lipoprotein receptor-related protein 4-like
TRINITY_DN100396_c0_g1_i1	sp|P0C6B8|SVEP1_RAT	P0C6B8	GO:0036303; GO:0010467; GO:0001945; GO:0048014; GO:0005509; GO:0008544; GO:0005737; GO:0007155; GO:0120193; GO:0005576; GO:0003017; GO:0005634; GO:0016020; GO:0003682; GO:0005615	Sushi, von Willebrand factor type A, EGF and pentraxin domain-containing protein 1 OS=Rattus norvegicus OX=10116 GN=Svep1 PE=1 SV=1	PF12946.7; PF00092.28; PF12947.7; PF07699.13; PF12662.7	6573_0:00022c	31246at33208	sushi, von Willebrand factor type A, EGF and pentraxin domain-containing protein 1
TRINITY_DN10040_c0_g2_i1	sp|Q6NRK8|THEM6_XENLA	Q6NRK8	GO:0005576	Protein THEM6 OS=Xenopus laevis OX=8355 GN=them6 PE=2 SV=1	PF13279.6	6573_0:003458	10983at6447	protein THEM6-like
TRINITY_DN100416_c0_g1_i1						6565_0:001d30	16171at6447	uncharacterized protein LOC105328176
TRINITY_DN100426_c0_g1_i1	sp|Q9BSF4|TIM29_HUMAN	Q9BSF4	GO:0005743; GO:0005758; GO:0042721; GO:0005739; GO:0015031; GO:0016021; GO:0005515; GO:0140318; GO:0016020; GO:0045039	Mitochondrial import inner membrane translocase subunit Tim29 OS=Homo sapiens OX=9606 GN=TIMM29 PE=1 SV=2	PF10171.9; PF14631.6	225164_0:004080	10386at6447	mitochondrial import inner membrane translocase subunit Tim29
TRINITY_DN100429_c0_g1_i1	sp|Q9VU02|SMD1_DROME	Q9VU02	GO:0005681; GO:0005687; GO:0005685; GO:0071011; GO:0008380; GO:0006396; GO:0071013; GO:0034715; GO:0003723; GO:0097526; GO:0005689; GO:0005686; GO:0034719; GO:0000387; GO:0005634; GO:0006397; GO:0030532; GO:0005829; GO:0005682; GO:0000243	Probable small nuclear ribonucleoprotein Sm D1 OS=Drosophila melanogaster OX=7227 GN=SmD1 PE=1 SV=1		6526_0:0051cb	11115at6447	small nuclear ribonucleoprotein Sm D1-like	R-DME-72163; R-DME-72165	mRNA Splicing - Major Pathway; mRNA Splicing - Minor Pathway
TRINITY_DN100438_c0_g1_i1						29159_0:00132f	403296at33208	testis-specific serine/threonine-protein kinase 3
TRINITY_DN100439_c0_g1_i1						6573_0:0028bb	1270467at2759	Winged helix-like DNA-binding domain superfamily
TRINITY_DN10044_c0_g1_i1						29159_0:0018de	13209at6447	myosin heavy chain, striated muscle
TRINITY_DN100445_c0_g1_i1						6565_0:0075cd	120652at33208	Ribonuclease H superfamily
TRINITY_DN100447_c0_g1_i1	sp|Q6ZT98|TTLL7_HUMAN	Q6ZT98	GO:0043014; GO:0000166; GO:0005856; GO:0005874; GO:0005524; GO:0042995; GO:0007275; GO:0016874; GO:0018095; GO:0005737; GO:0070740; GO:0030154; GO:0015631; GO:0006464; GO:0007399; GO:0005929; GO:0048487; GO:0005829; GO:0030425; GO:0000226	Tubulin polyglutamylase TTLL7 OS=Homo sapiens OX=9606 GN=TTLL7 PE=1 SV=2		6500_0:001bcc	1149at6447	Tubulin polyglutamylase TTLL7	R-HSA-8955332	Carboxyterminal post-translational modifications of tubulin
TRINITY_DN10045_c1_g2_i1					PF01981.16; PF16326.5; PF05266.14; PF09351.10; PF12889.7; PF03630.14; PF05837.12; PF11802.8	133434_0:001487	1467214at2759	centromere protein H
TRINITY_DN100455_c0_g1_i1						133434_0:002ce3	1223313at2759	putative defense protein 3
TRINITY_DN10046_c0_g2_i6	sp|Q5UAW9|GP157_HUMAN	Q5UAW9	GO:0007186; GO:0042995; GO:0007165; GO:0007275; GO:0007166; GO:0030154; GO:0060019; GO:0051482; GO:0060170; GO:0004930; GO:0004888; GO:0016021; GO:0005886; GO:0016020; GO:0048512	G-protein coupled receptor 157 OS=Homo sapiens OX=9606 GN=GPR157 PE=2 SV=2	PF17364.2; PF01534.17	6565_0:0043c5	10188at1206795	G-protein coupled receptor 157
TRINITY_DN100469_c0_g1_i1						6565_0:00556f	12156at6447	uncharacterized protein LOC105331065
TRINITY_DN10047_c0_g1_i2	sp|P08503|ACADM_RAT	P08503	GO:0003995; GO:0033539; GO:0070991; GO:0006635; GO:0016627; GO:0050660; GO:0051793; GO:0005759; GO:0006629; GO:0016853; GO:0006631; GO:0000062; GO:0005739; GO:0016491	Medium-chain specific acyl-CoA dehydrogenase, mitochondrial OS=Rattus norvegicus OX=10116 GN=Acadm PE=1 SV=1	PF08028.11; PF02771.16; PF11794.8; PF02770.19; PF00441.24	133434_0:000fac	281661at33208	Acyl-CoA dehydrogenase/oxidase, N-terminal	R-RNO-77348	Beta oxidation of octanoyl-CoA to hexanoyl-CoA
TRINITY_DN10047_c0_g2_i1	sp|Q9VSA3|ACADM_DROME	Q9VSA3	GO:0003995; GO:0070991; GO:0006635; GO:0016627; GO:0050660; GO:0005759; GO:0051793; GO:0006629; GO:0005829; GO:0006631; GO:0005739; GO:0016491	Probable medium-chain specific acyl-CoA dehydrogenase, mitochondrial OS=Drosophila melanogaster OX=7227 GN=CG12262 PE=2 SV=1		133434_0:000fac	281661at33208	Acyl-CoA dehydrogenase/oxidase, N-terminal	R-DME-77348	Beta oxidation of octanoyl-CoA to hexanoyl-CoA
TRINITY_DN100470_c0_g1_i1	sp|P47743|GRM8_MOUSE	P47743	GO:0007186; GO:0035249; GO:0005887; GO:0051966; GO:0007216; GO:0007268; GO:2000300; GO:0043005; GO:0008066; GO:0046928; GO:0001642; GO:0001640; GO:0004930; GO:0016021; GO:0005886; GO:0042734; GO:0007196; GO:0098978; GO:0050966	Metabotropic glutamate receptor 8 OS=Mus musculus OX=10090 GN=Grm8 PE=1 SV=2		6573_0:002fd5	227553at33208	metabotropic glutamate receptor 4	R-MMU-418594; R-MMU-420499	G alpha (i) signalling events; Class C/3 (Metabotropic glutamate/pheromone receptors)
TRINITY_DN10048_c0_g1_i10	sp|O35449|PRRT1_MOUSE	O35449	GO:0007611; GO:0060292; GO:0060291; GO:0008104; GO:0030545; GO:0050808; GO:0006468; GO:0034394; GO:0016021; GO:0099055; GO:2000311; GO:0098978; GO:0005886; GO:0098839; GO:0045202; GO:0030672; GO:0016020; GO:0030054	Proline-rich transmembrane protein 1 OS=Mus musculus OX=10090 GN=Prrt1 PE=1 SV=1	PF04505.12	6565_0:000555	11913at6447	Proline-rich transmembrane protein 1
TRINITY_DN10048_c1_g1_i1	sp|Q9H2H8|PPIL3_HUMAN	Q9H2H8	GO:0005681; GO:0008380; GO:0071013; GO:0006457; GO:0016853; GO:0006397; GO:0005515; GO:0000398; GO:0003755; GO:0000413	Peptidyl-prolyl cis-trans isomerase-like 3 OS=Homo sapiens OX=9606 GN=PPIL3 PE=1 SV=1	PF00160.21	6526_0:0034bd	1392223at2759	Peptidyl-prolyl cis-trans isomerase	R-HSA-72163	mRNA Splicing - Major Pathway
TRINITY_DN100485_c0_g1_i1					PF00001.21	6573_0:0005ee	1236836at2759	Putative g-protein coupled receptor
TRINITY_DN10049_c0_g4_i1	sp|Q8VI63|MOB2_MOUSE	Q8VI63	GO:0030036; GO:0048471; GO:0005654; GO:0005737; GO:0001934; GO:0010976; GO:0046872; GO:0005634; GO:0003674; GO:0005829; GO:0005730; GO:0044306	MOB kinase activator 2 OS=Mus musculus OX=10090 GN=Mob2 PE=1 SV=1	PF03637.17	6565_0:000a11	1127941at2759	MOB kinase activator family
TRINITY_DN100494_c0_g1_i1						6573_0:002539	14at1206795	uncharacterized protein LOC106157571
TRINITY_DN1005_c0_g2_i1	sp|Q99LM3|SMTL1_MOUSE	Q99LM3	GO:0017020; GO:0014823; GO:0030036; GO:0008157; GO:0045892; GO:0005815; GO:0042493; GO:0031430; GO:0031941; GO:0045907; GO:0005515; GO:0043292; GO:0005634; GO:0018105; GO:0042310; GO:0004864; GO:0005516; GO:0031674; GO:0005523; GO:0048644	Smoothelin-like protein 1 OS=Mus musculus OX=10090 GN=Smtnl1 PE=1 SV=1	PF12510.8; PF06294.11; PF00307.31; PF11971.8	29159_0:0007b0	366889at33208	cytospin-B
TRINITY_DN1005_c4_g1_i1	sp|Q9TT99|ATOX1_CANLF	Q9TT99	GO:0006878; GO:0006979; GO:0046872; GO:0005829; GO:0006825; GO:0006811; GO:0016531	Copper transport protein ATOX1 OS=Canis lupus familiaris OX=9615 GN=ATOX1 PE=3 SV=1		29159_0:0003d4	11783at6447	metal homeostasis factor ATX1-like	R-CFA-6803544	Ion influx/efflux at host-pathogen interface
TRINITY_DN1005_c5_g1_i1	sp|Q66I21|AL8A1_DANRE	Q66I21	GO:0005737; GO:0047102; GO:0001889; GO:0016620; GO:0097053; GO:0016491	2-aminomuconic semialdehyde dehydrogenase OS=Danio rerio OX=7955 GN=aldh8a1 PE=2 SV=1	PF00171.22	29159_0:004dc3	2526at6447	aldehyde dehydrogenase family 8 member A1
TRINITY_DN10050_c1_g1_i4	sp|Q3MHQ7|TM86A_BOVIN	Q3MHQ7	GO:0047408; GO:0047409; GO:0016021; GO:0016020	Lysoplasmalogenase-like protein TMEM86A OS=Bos taurus OX=9913 GN=TMEM86A PE=2 SV=1	PF09057.10; PF07947.14	6573_0:00190a	1516092at2759	lysoplasmalogenase-like protein TMEM86A
TRINITY_DN100514_c0_g1_i1					PF00653.21	29159_0:006e80	1340284at2759	baculoviral IAP repeat-containing protein 7
TRINITY_DN100517_c0_g1_i1	sp|Q10568|CPSF2_BOVIN	Q10568	GO:0006398; GO:0005847; GO:0003723; GO:0006397; GO:0005634; GO:0006379; GO:0098789; GO:0006378	Cleavage and polyadenylation specificity factor subunit 2 OS=Bos taurus OX=9913 GN=CPSF2 PE=1 SV=1		6565_0:002d38	129179at33208	Cleavage and polyadenylation specificity factor subunit 2	R-BTA-159231; R-BTA-72163; R-BTA-72187; R-BTA-73856; R-BTA-77595	Transport of Mature mRNA Derived from an Intronless Transcript; mRNA Splicing - Major Pathway; mRNA 3'-end processing; RNA Polymerase II Transcription Termination; Processing of Intronless Pre-mRNAs
TRINITY_DN10052_c0_g1_i1					PF10240.9; PF08403.10	29159_0:000c9e	1522376at2759	UBAP1-MVB12-associated (UMA)-domain containing protein 1
TRINITY_DN100521_c0_g1_i1						29159_0:005950	1299109at2759	uncharacterized protein LOC106079546
TRINITY_DN100537_c0_g1_i1						6565_0:0065c9	290072at33208	Zinc finger BED-type containing 8
TRINITY_DN100548_c0_g1_i1						29159_0:001738	1211at6447	uncharacterized protein LOC106873908
TRINITY_DN10056_c0_g1_i1	sp|P79134|ANXA6_BOVIN	P79134	GO:0051283; GO:0001778; GO:0051015; GO:0042584; GO:0005509; GO:0001755; GO:0005262; GO:0051560; GO:0005737; GO:0001786; GO:0006937; GO:0015276; GO:0003418; GO:0005925; GO:0015485; GO:0031214; GO:0035374; GO:0097190; GO:0005544; GO:0005525	Annexin A6 OS=Bos taurus OX=9913 GN=ANXA6 PE=1 SV=2	PF11712.8	6573_0:005797	500720at33208	Annexin
TRINITY_DN10057_c0_g1_i1	sp|Q25390|SCRA_LIMPO	Q25390		Alpha-scruin OS=Limulus polyphemus OX=6850 PE=2 SV=1	PF07646.15; PF13418.6; PF01344.25; PF13854.6; PF11822.8; PF00651.31; PF07707.15; PF13415.6; PF13964.6	6573_0:005b92	1344273at2759	alpha-scruin
TRINITY_DN100578_c0_g1_i1	sp|Q3SEK0|CATR5_PARTE	Q3SEK0	GO:0005509; GO:0005737; GO:0046872; GO:0005856	Caltractin ICL1e OS=Paramecium tetraurelia OX=5888 GN=Icl1e PE=3 SV=1		6669_0:006fbe
TRINITY_DN10058_c0_g2_i5					PF04740.12; PF09548.10; PF15739.5
TRINITY_DN100580_c0_g1_i1	sp|Q92733|PRCC_HUMAN	Q92733	GO:0051726; GO:0005654; GO:0005515; GO:0000398; GO:0005634; GO:0016607; GO:0007049	Proline-rich protein PRCC OS=Homo sapiens OX=9606 GN=PRCC PE=1 SV=1		7574_0:003629	10581at1206795	proline-rich protein PRCC	R-HSA-72163	mRNA Splicing - Major Pathway
TRINITY_DN100588_c0_g1_i1						7130_0:000d79	107306at6656	gephyrin
TRINITY_DN100589_c0_g1_i1	sp|O88738|BIRC6_MOUSE	O88738	GO:0006511; GO:0004869; GO:0010466; GO:0030414; GO:0030496; GO:0005815; GO:0004842; GO:0006915; GO:0005737; GO:0005802; GO:0001890; GO:0016740; GO:0032465; GO:0005515; GO:0005634; GO:0005794; GO:0051301; GO:0005768; GO:0061631; GO:0007049; GO:0043066	Baculoviral IAP repeat-containing protein 6 OS=Mus musculus OX=10090 GN=Birc6 PE=1 SV=2		29159_0:0026da	1404665at2759	ubiquitin-conjugating enzyme E2 Z	R-MMU-8866652; R-MMU-983168	Synthesis of active ubiquitin: roles of E1 and E2 enzymes; Antigen processing: Ubiquitination & Proteasome degradation
TRINITY_DN10059_c0_g3_i5	sp|Q5F4A1|G2E3_CHICK	Q5F4A1	GO:0004842; GO:0005737; GO:0016567; GO:0006915; GO:0007275; GO:0016740; GO:0046872; GO:0005634; GO:0005730	G2/M phase-specific E3 ubiquitin-protein ligase OS=Gallus gallus OX=9031 GN=G2E3 PE=2 SV=1	PF00632.25; PF02017.15	6573_0:000d45	15836at6447	G2/M phase-specific E3 ubiquitin-protein ligase
TRINITY_DN100594_c0_g1_i1	sp|Q862Z4|DNJB3_MACFU	Q862Z4		DnaJ homolog subfamily B member 3 OS=Macaca fuscata fuscata OX=9543 GN=DNAJB3 PE=2 SV=1	PF01165.20; PF00226.31	8083_0:00505c	108639at7898	dnaJ homolog subfamily B member 6-like isoform X1
TRINITY_DN100599_c0_g1_i1						29159_0:006dc2	105at6447	E3 ubiquitin-protein ligase UBR5-like
TRINITY_DN1006_c0_g1_i5	sp|Q5F4A1|G2E3_CHICK	Q5F4A1	GO:0004842; GO:0005737; GO:0016567; GO:0006915; GO:0007275; GO:0016740; GO:0046872; GO:0005634; GO:0005730	G2/M phase-specific E3 ubiquitin-protein ligase OS=Gallus gallus OX=9031 GN=G2E3 PE=2 SV=1	PF00632.25	6573_0:0015f4	1427811at2759	uncharacterized protein LOC110449089
TRINITY_DN10060_c0_g1_i3	sp|Q8VBV3|EXOS2_MOUSE	Q8VBV3	GO:0000178; GO:0006364; GO:0000467; GO:0071034; GO:0034427; GO:0071035; GO:0005654; GO:0005737; GO:0071051; GO:0043928; GO:0034475; GO:0000176; GO:0003723; GO:0071038; GO:0000177; GO:0005634; GO:0071049; GO:0005730	Exosome complex component RRP4 OS=Mus musculus OX=10090 GN=Exosc2 PE=1 SV=1	PF10447.9; PF14382.6	6573_0:0008a5	1121868at2759	exosome complex component RRP4	R-MMU-429958; R-MMU-450385; R-MMU-450513; R-MMU-450604; R-MMU-6791226	mRNA decay by 3' to 5' exoribonuclease; Butyrate Response Factor 1 (BRF1) binds and destabilizes mRNA; Tristetraprolin (TTP, ZFP36) binds and destabilizes mRNA; KSRP (KHSRP) binds and destabilizes mRNA; Major pathway of rRNA processing in the nucleolus and cytosol
TRINITY_DN100602_c0_g1_i1					PF05605.12	29159_0:0022cb	399629at33208	uncharacterized protein LOC111701152
TRINITY_DN100604_c0_g1_i1	sp|O75762|TRPA1_HUMAN	O75762	GO:0055085; GO:0015267; GO:0005887; GO:0010033; GO:0050896; GO:0051289; GO:0019233; GO:0016021; GO:0005886; GO:0016020; GO:0006811; GO:0005216; GO:0015278; GO:0097604; GO:0070588	Transient receptor potential cation channel subfamily A member 1 OS=Homo sapiens OX=9606 GN=TRPA1 PE=1 SV=3	PF00023.30; PF13637.6; PF13857.6; PF12796.7; PF13606.6; PF08356.12	29159_0:003719	1115202at2759	Ankyrin repeat-containing domain	R-HSA-3295583	TRP channels
TRINITY_DN100608_c0_g1_i1					PF15127.6; PF10674.9
TRINITY_DN100609_c0_g1_i1					PF05192.18; PF08689.10
TRINITY_DN10061_c0_g1_i3	sp|Q6DHK8|NTCP7_DANRE	Q6DHK8	GO:0055085; GO:0015293; GO:0005783; GO:0051216; GO:0005789; GO:0016021; GO:0005886; GO:0005794; GO:0006811; GO:0016020; GO:0006814; GO:0030282; GO:0000139	Sodium/bile acid cotransporter 7 OS=Danio rerio OX=7955 GN=slc10a7 PE=2 SV=1	PF13593.6; PF01758.16	45351_0:00524c	506943at33208	Solute carrier family 10 member 7
TRINITY_DN10062_c0_g1_i3	sp|Q6GL69|MK67I_XENTR	Q6GL69	GO:0003676; GO:0000463; GO:0005730; GO:0005634; GO:0003723	MKI67 FHA domain-interacting nucleolar phosphoprotein-like OS=Xenopus tropicalis OX=8364 GN=nifk PE=2 SV=1	PF16367.5; PF00076.22; PF14605.6; PF13893.6	1720309_0:00188d	1513142at2759	MKI67 FHA domain-interacting nucleolar phosphoprotein
TRINITY_DN10062_c1_g1_i6					PF16026.5; PF14509.6; PF04163.12	6565_0:00250e	13636at6447	uncharacterized protein LOC111126531
TRINITY_DN100627_c0_g1_i1	sp|Q9Z2K9|IDHC_MICME	Q9Z2K9	GO:0006097; GO:0000287; GO:0004450; GO:0005737; GO:0016616; GO:0016491; GO:0051287; GO:0046872; GO:0006099; GO:0005829; GO:0006102; GO:0006103	Isocitrate dehydrogenase [NADP] cytoplasmic OS=Microtus mexicanus OX=79689 GN=IDH1 PE=2 SV=1		29159_0:0018b1	2387at6447	Isocitrate dehydrogenase
TRINITY_DN100628_c0_g1_i1	sp|P70704|AT8A1_MOUSE	P70704	GO:0043231; GO:0140331; GO:0000166; GO:0006869; GO:0015914; GO:0000287; GO:0005524; GO:0005783; GO:0030285; GO:0140346; GO:0016021; GO:0005886; GO:0046872; GO:0005794; GO:0005515; GO:0140326; GO:0031410; GO:0016020	Phospholipid-transporting ATPase IA OS=Mus musculus OX=10090 GN=Atp8a1 PE=1 SV=2	PF00702.26; PF07464.11	7574_0:00389b	299at1206795	Phospholipid-transporting ATPase	R-MMU-6798695; R-MMU-936837	Neutrophil degranulation; Ion transport by P-type ATPases
TRINITY_DN100639_c0_g1_i1					PF05821.11; PF03476.16
TRINITY_DN10064_c0_g1_i4					PF01697.27
TRINITY_DN100648_c0_g1_i1	sp|D2KQB0|HHEX_PATMI	D2KQB0	GO:0003677; GO:0006355; GO:0007275; GO:0000981; GO:0005634; GO:0006357	Hematopoietically-expressed homeobox protein HHEX homolog OS=Patiria miniata OX=46514 GN=hhex PE=2 SV=1	PF05920.11; PF00046.29	6565_0:003bf2	10209at1206795	Hematopoietically-expressed homeobox protein hhex
TRINITY_DN100654_c0_g1_i1	sp|Q8I7P9|POL5_DROME	Q8I7P9	GO:0016787; GO:0003676; GO:0016779; GO:0006508; GO:0015074; GO:0006313; GO:0004519; GO:0016740; GO:0008233; GO:0003964; GO:0005634; GO:0004518; GO:0006278; GO:0090305	Retrovirus-related Pol polyprotein from transposon opus OS=Drosophila melanogaster OX=7227 GN=pol PE=4 SV=1		7950_0:001af2	195413at33208	uncharacterized protein K02A2.6-like
TRINITY_DN100656_c0_g1_i1	sp|Q9YHC3|TBB1_GADMO	Q9YHC3	GO:0000166; GO:0005856; GO:0005874; GO:0005737; GO:0007017; GO:0003924; GO:0005200; GO:0007010; GO:0005525	Tubulin beta-1 chain OS=Gadus morhua OX=8049 PE=2 SV=1		10020_0:003854	259639at33208	Tubulin beta chain
TRINITY_DN100672_c0_g1_i1					PF02412.18
TRINITY_DN100673_c0_g1_i1					PF06098.11
TRINITY_DN100674_c0_g1_i1	sp|P46197|ANPRB_BOVIN	P46197	GO:0005887; GO:0004383; GO:0016941; GO:0005524; GO:0004672; GO:0007165; GO:0017046; GO:0016849; GO:0006468; GO:0009190; GO:0016829; GO:0006182; GO:0016021; GO:0005886; GO:0005525; GO:0035556; GO:0001503; GO:0001653; GO:0007168	Atrial natriuretic peptide receptor 2 OS=Bos taurus OX=9913 GN=NPR2 PE=2 SV=1		29159_0:00516e	123766at33208	Guanylate cyclase
TRINITY_DN100679_c0_g1_i1	sp|Q7T0Y4|DRC1_XENLA	Q7T0Y4	GO:0005856; GO:0042995; GO:0005737; GO:0005858; GO:0070286; GO:0031514; GO:0005930; GO:0060285; GO:0005929	Dynein regulatory complex protein 1 OS=Xenopus laevis OX=8355 GN=drc1 PE=2 SV=1	PF06428.11; PF07246.11; PF14772.6; PF05478.11; PF05667.11; PF15828.5; PF01496.19; PF03652.15; PF08317.11; PF09731.9; PF01743.20; PF02601.15; PF06156.13; PF10444.9; PF16421.5; PF18570.1	50429_0:001c1e	246426at33208	dynein regulatory complex protein 1
TRINITY_DN10068_c0_g2_i2	sp|P82596|PLC_HALLA	P82596	GO:0030246	Perlucin OS=Haliotis laevigata OX=36097 PE=1 SV=3	PF08674.10; PF00059.21	6573_0:0053e2	1247924at2759	Asialoglycoprotein receptor 1
TRINITY_DN10068_c3_g1_i1						225164_0:001db5	1105625at2759	DNA-(apurinic or apyrimidinic site) lyase
TRINITY_DN100685_c0_g1_i1					PF13412.6; PF01498.18; PF12802.7; PF12116.8; PF13565.6; PF13551.6; PF01978.19; PF13384.6; PF08221.11; PF02796.15; PF09339.10; PF04967.12; PF00440.23; PF05930.12	219809_0:002c58	120273at6656	histone-lysine N-methyltransferase SETMAR-like
TRINITY_DN1007_c0_g1_i4					PF00084.20	72036_0:001cfc	31246at33208	sushi, von Willebrand factor type A, EGF and pentraxin domain-containing protein 1
TRINITY_DN1007_c3_g1_i2	sp|Q0VCK5|AP2A2_BOVIN	Q0VCK5	GO:0030117; GO:0008289; GO:0140312; GO:0005905; GO:0006897; GO:0016192; GO:0006898; GO:0030131; GO:0072583; GO:0006886; GO:0015031; GO:0005886; GO:0005515; GO:0016020; GO:0048268; GO:0035615; GO:0030122	AP-2 complex subunit alpha-2 OS=Bos taurus OX=9913 GN=AP2A2 PE=1 SV=1	PF08167.12; PF13646.6; PF02296.16; PF01602.20; PF12717.7; PF02985.22; PF09066.10; PF12046.8; PF02883.20	6573_0:00195f	511at6447	AP-2 complex subunit alpha
TRINITY_DN100702_c0_g1_i1	sp|Q8CD91|SMOC2_MOUSE	Q8CD91	GO:0005539; GO:0045743; GO:2001028; GO:0010595; GO:0005509; GO:0071944; GO:0031012; GO:0045766; GO:0030198; GO:0005614; GO:0008201; GO:2000573; GO:1900748; GO:0050840; GO:0005604; GO:0045931; GO:0035470; GO:0005615; GO:0010811	SPARC-related modular calcium-binding protein 2 OS=Mus musculus OX=10090 GN=Smoc2 PE=1 SV=1		29159_0:00014c	1057719at2759	SPARC-related modular calcium-binding protein 2
TRINITY_DN100712_c0_g1_i1						7741_0:002d75	1233632at2759	Reverse transcriptase
TRINITY_DN100713_c0_g1_i1	sp|Q8IWV8|UBR2_HUMAN	Q8IWV8	GO:0008270; GO:0033522; GO:0032007; GO:0071233; GO:0007283; GO:0007131; GO:0005737; GO:0070728; GO:0016567; GO:0006342; GO:0007140; GO:0030163; GO:0016740; GO:0005515; GO:0046872; GO:0005634; GO:0010529; GO:0061630; GO:0000151; GO:0071596	E3 ubiquitin-protein ligase UBR2 OS=Homo sapiens OX=9606 GN=UBR2 PE=1 SV=1		6573_0:0009d0	270at6447	LOW QUALITY PROTEIN: E3 ubiquitin-protein ligase UBR2-like	R-HSA-983168	Antigen processing: Ubiquitination & Proteasome degradation
TRINITY_DN100722_c0_g1_i1					PF06818.15; PF16888.5; PF14362.6; PF07798.11; PF16515.5; PF13870.6; PF16516.5; PF15898.5; PF08317.11; PF09304.10; PF07889.12; PF04513.12; PF06156.13; PF01576.19; PF09636.10; PF01442.18; PF03954.14; PF11932.8; PF06160.12; PF16809.5; PF00038.21
TRINITY_DN10073_c0_g1_i2	sp|O15381|NVL_HUMAN	O15381	GO:0032092; GO:0016887; GO:0000166; GO:0042254; GO:0005654; GO:0005524; GO:0005697; GO:0003723; GO:0000176; GO:0051973; GO:0005634; GO:1990275; GO:0016020; GO:0005730	Nuclear valosin-containing protein-like OS=Homo sapiens OX=9606 GN=NVL PE=1 SV=1	PF13479.6; PF00158.26; PF01637.18; PF13086.6; PF06068.13; PF13245.6; PF00931.22; PF09848.9; PF13521.6; PF17862.1; PF07372.12; PF07724.14; PF07728.14; PF13191.6; PF06414.12; PF05673.13; PF13173.6; PF02562.16; PF13238.6; PF00004.29; PF01202.22; PF13671.6; PF01695.17; PF10662.9; PF13189.6; PF13401.6; PF01078.21; PF00910.22; PF12775.7; PF03266.15; PF07726.11; PF01057.17; PF14532.6; PF00005.27; PF1672…	7574_0:003e94	169540at33208	spermatogenesis-associated protein 5-like protein 1
TRINITY_DN100737_c0_g1_i1						8090_0:001f9c	141134at7742	uncharacterized protein K02A2.6-like
TRINITY_DN100739_c0_g1_i1	sp|P52183|ANNU_SCHAM	P52183	GO:0016746; GO:0018149; GO:0003810; GO:0016740; GO:0005886; GO:0046872; GO:0016020; GO:0018215	Annulin OS=Schistocerca americana OX=7009 PE=2 SV=1	PF01841.19	6573_0:00243e	153729at33208	Transglutaminase, C-terminal
TRINITY_DN100747_c0_g1_i1	sp|Q9XZC0|LCTA_LATTR	Q9XZC0	GO:0035821; GO:0044218; GO:0005576; GO:0090729; GO:0016021; GO:0016020; GO:0006887	Alpha-latrocrustotoxin-Lt1a (Fragment) OS=Latrodectus tredecimguttatus OX=6925 PE=2 SV=2	PF00023.30; PF13637.6; PF12796.7; PF13606.6; PF13857.6	6526_0:0019b1	213306at33208	Palmitoyltransferase
TRINITY_DN100755_c0_g1_i1						6573_0:001ec6	1549at6447	cadherin EGF LAG seven-pass G-type receptor 1-like isoform X1
TRINITY_DN100757_c0_g1_i1	sp|Q61194|P3C2A_MOUSE	Q61194	GO:0005524; GO:0005737; GO:0016740; GO:0005886; GO:0005794; GO:0046934; GO:0016020; GO:0006887; GO:0046854; GO:0048015; GO:0035005; GO:0005634; GO:0031410; GO:0016310; GO:0005829; GO:0035004; GO:0000166; GO:0006897; GO:0052812; GO:0016303; GO:0090050; GO:0035091; GO:0016301	Phosphatidylinositol 4-phosphate 3-kinase C2 domain-containing subunit alpha OS=Mus musculus OX=10090 GN=Pik3c2a PE=1 SV=2		6565_0:0003a5	204282at2759	Phosphatidylinositol 3-kinase VPS34	R-MMU-1660499; R-MMU-1660514; R-MMU-1660516; R-MMU-432722; R-MMU-8856828	Synthesis of PIPs at the plasma membrane; Synthesis of PIPs at the Golgi membrane; Synthesis of PIPs at the early endosome membrane; Golgi Associated Vesicle Biogenesis; Clathrin-mediated endocytosis
TRINITY_DN10077_c0_g1_i3	sp|Q14CW9|AT7L3_HUMAN	Q14CW9	GO:0008270; GO:0003713; GO:0030374; GO:0016578; GO:0000124; GO:0005515; GO:0046872; GO:0005634; GO:0006325; GO:0071819; GO:0006357; GO:0045893	Ataxin-7-like protein 3 OS=Homo sapiens OX=9606 GN=ATXN7L3 PE=1 SV=1	PF08209.11; PF08313.12; PF04929.12	6573_0:0049db	1244885at2759	Ataxin-7-like protein 3	R-HSA-3214847	HATs acetylate histones
TRINITY_DN100780_c0_g1_i1						6565_0:004661	398889at33208	kyphoscoliosis peptidase
TRINITY_DN100782_c0_g1_i1						6565_0:007c46	1115198at2759	death domain-containing protein 1
TRINITY_DN100783_c0_g1_i1	sp|P49154|RS2_URECA	P49154	GO:0003735; GO:0005840; GO:0006412; GO:0015935; GO:0003723	40S ribosomal protein S2 OS=Urechis caupo OX=6431 GN=RPS2 PE=2 SV=1	PF00333.20	35525_0:006c07	113637at6656	Ribosomal protein S5
TRINITY_DN100793_c0_g1_i1						29159_0:002774	15416at6447	uncharacterized protein LOC110450541
TRINITY_DN100795_c0_g1_i1	sp|Q86VQ1|GLCI1_HUMAN	Q86VQ1	GO:0005737	Glucocorticoid-induced transcript 1 protein OS=Homo sapiens OX=9606 GN=GLCCI1 PE=1 SV=1	PF15388.6	6565_0:007894	1132072at2759	protein FAM117B
TRINITY_DN100797_c0_g1_i1	sp|Q803C3|HDAC3_DANRE	Q803C3	GO:0004407; GO:0048511; GO:0070932; GO:0016787; GO:0009953; GO:0003714; GO:0000122; GO:0005737; GO:0017053; GO:0000118; GO:0070933; GO:0001889; GO:0001525; GO:0005634; GO:0006325; GO:0045944; GO:0048916; GO:0003682; GO:0032041	Histone deacetylase 3 OS=Danio rerio OX=7955 GN=hdac3 PE=2 SV=1		6573_0:0026dc	2201at6447	Histone deacetylase
TRINITY_DN1008_c1_g1_i1	sp|A3KQV2|BROX_DANRE	A3KQV2	GO:0008150; GO:0016020; GO:0003674	BRO1 domain-containing protein BROX OS=Danio rerio OX=7955 GN=brox PE=2 SV=1	PF03097.18	29159_0:003c0e	276693at33208	BRO1 domain-containing protein BROX
TRINITY_DN10080_c0_g2_i1					PF13885.6
TRINITY_DN100803_c0_g1_i1	sp|P63103|1433Z_BOVIN	P63103	GO:0008039; GO:0042470; GO:0003016; GO:0070371; GO:0030324; GO:0070372; GO:0005737; GO:0010941; GO:0007165; GO:0098686; GO:0006468; GO:0006605; GO:0035148; GO:0001525; GO:0005634; GO:0019904	14-3-3 protein zeta/delta OS=Bos taurus OX=9913 GN=YWHAZ PE=1 SV=1		8208_0:004a74	1176818at2759	14-3-3 protein	R-BTA-111447; R-BTA-3769402; R-BTA-392517; R-BTA-430116; R-BTA-450604; R-BTA-512988; R-BTA-5625740; R-BTA-5628897; R-BTA-75035; R-BTA-9013700; R-BTA-9614399	Activation of BAD and translocation to mitochondria ; Deactivation of the beta-catenin transactivating complex; Rap1 signalling; GP1b-IX-V activation signalling; KSRP (KHSRP) binds and destabilizes mRNA; Interleukin-3, Interleukin-5 and GM-CSF signaling; RHO GTPases activate PKNs; TP53 Regulates Metabolic Genes; Chk1/Chk2(Cds1) mediated inactivation of Cyclin B:Cdk1 complex; NOTCH4 Activation and…
TRINITY_DN100806_c0_g1_i1						225164_0:004700	1268539at2759	A0A2N1NRZ3_9GLOM
TRINITY_DN10081_c0_g1_i1	sp|Q80T11|USH1G_MOUSE	Q80T11	GO:0036064; GO:0001917; GO:0005856; GO:0045494; GO:0060122; GO:0005737; GO:0032391; GO:0050953; GO:0015629; GO:0005886; GO:0060113; GO:0050957; GO:0030507; GO:0042802; GO:0007605; GO:0016020; GO:0042472	Usher syndrome type-1G protein homolog OS=Mus musculus OX=10090 GN=Ush1g PE=1 SV=1	PF00023.30; PF13637.6; PF13857.6; PF00536.30; PF12796.7; PF13606.6; PF07647.17	6573_0:0044da	1344159at2759	ankyrin repeat and SAM domain-containing protein 4B
TRINITY_DN100818_c0_g1_i1						6573_0:00480d	1213at6447	myosin-IIIa
TRINITY_DN100820_c0_g1_i1						7574_0:003e8c	163609at2759	dystroglycan
TRINITY_DN100822_c0_g1_i1	sp|Q2RM63|HCP_MOOTA	Q2RM63	GO:0051539; GO:0050418; GO:0016661; GO:0005737; GO:0046872; GO:0003824; GO:0051536; GO:0016491	Hydroxylamine reductase OS=Moorella thermoacetica (strain ATCC 39073 / JCM 9320) OX=264732 GN=hcp PE=3 SV=1		6412_0:0028a9	14105at1206795	uncharacterized protein LOC106155723
TRINITY_DN100824_c0_g1_i1					PF15851.5; PF18840.1	6565_0:0085a5	789556at2759	exostosin-1
TRINITY_DN100825_c0_g1_i1	sp|Q5U3C3|TM164_HUMAN	Q5U3C3	GO:0016020; GO:0016021	Transmembrane protein 164 OS=Homo sapiens OX=9606 GN=TMEM164 PE=2 SV=1	PF14808.6	6573_0:0000c0	1509337at2759	transmembrane protein 164
TRINITY_DN100829_c0_g1_i1	sp|O88277|FAT2_RAT	O88277	GO:0098609; GO:0007156; GO:0005509; GO:0007155; GO:0016021; GO:0005886; GO:0005794; GO:0030054; GO:0010631; GO:0016020; GO:0005912; GO:0031589	Protocadherin Fat 2 OS=Rattus norvegicus OX=10116 GN=Fat2 PE=1 SV=1	PF00028.17	31033_0:002b77	2157at7742	protocadherin-23
TRINITY_DN100839_c0_g1_i1						52670_0:003789	151563at7898	uncharacterized protein LOC106527413
TRINITY_DN100841_c0_g1_i1						29159_0:003461	120924at2759	stonustoxin subunit alpha-like
TRINITY_DN100848_c0_g1_i1	sp|Q15022|SUZ12_HUMAN	Q15022	GO:0035064; GO:0035098; GO:0019058; GO:0001226; GO:0070317; GO:0045814; GO:0005515; GO:0046872; GO:0031490; GO:0005634; GO:0006325; GO:0046976; GO:0042054	Polycomb protein SUZ12 OS=Homo sapiens OX=9606 GN=SUZ12 PE=1 SV=3		286706_0:000cdc	122694at33208	polycomb protein SUZ12	R-HSA-212300; R-HSA-2559580; R-HSA-3214841; R-HSA-4551638; R-HSA-5617472; R-HSA-8943724; R-HSA-8943724; R-HSA-8953750	PRC2 methylates histones and DNA; Oxidative Stress Induced Senescence; PKMTs methylate histone lysines; SUMOylation of chromatin organization proteins; Activation of anterior HOX genes in hindbrain development during early embryogenesis; Regulation of PTEN gene transcription; Regulation of PTEN gene transcription; Transcriptional Regulation by E2F6
TRINITY_DN10085_c0_g1_i1					PF11695.8
TRINITY_DN100863_c0_g1_i1	sp|P15128|CP4B1_RABIT	P15128	GO:0043231; GO:0070330; GO:0005783; GO:0005789; GO:0016705; GO:0004497; GO:0016491; GO:0005506; GO:0046872; GO:0016020; GO:0020037	Cytochrome P450 4B1 OS=Oryctolagus cuniculus OX=9986 GN=CYP4B1 PE=1 SV=1		6573_0:00051f	1247045at2759	Cytochrome P450
TRINITY_DN100869_c0_g1_i1						225164_0:002df2	1353742at2759	iduronate 2-sulfatase
TRINITY_DN10087_c0_g1_i1	sp|Q8BL00|CDHR3_MOUSE	Q8BL00	GO:0005887; GO:0007156; GO:0005509; GO:0007155; GO:0016021; GO:0005886; GO:0016020	Cadherin-related family member 3 OS=Mus musculus OX=10090 GN=Cdhr3 PE=2 SV=2	PF00028.17	6565_0:001de1	12386at6447	protocadherin Fat 1-like
TRINITY_DN100872_c0_g1_i1						7739_0:000a89	1343623at2759	HTH CenpB-type DNA-binding domain
TRINITY_DN10088_c0_g1_i1	sp|Q1RMR0|RPC7L_BOVIN	Q1RMR0	GO:0005666; GO:0006383; GO:0005634	DNA-directed RNA polymerase III subunit RPC7-like OS=Bos taurus OX=9913 GN=POLR3GL PE=2 SV=1	PF03286.14; PF11705.8	7574_0:0002cd	11243at1206795	DNA-directed RNA polymerase III subunit RPC7-like
TRINITY_DN100880_c0_g1_i1	sp|P48052|CBPA2_HUMAN	P48052	GO:0008270; GO:0008237; GO:0007039; GO:0016787; GO:0006508; GO:0005576; GO:0004180; GO:0008233; GO:0005773; GO:0046872; GO:0004181; GO:0005615	Carboxypeptidase A2 OS=Homo sapiens OX=9606 GN=CPA2 PE=1 SV=3		6565_0:0041ea	208397at33208	carboxypeptidase B
TRINITY_DN100898_c0_g1_i1	sp|Q3KRF3|CA131_RAT	Q3KRF3	GO:0005694	Uncharacterized protein C1orf131 homolog OS=Rattus norvegicus OX=10116 PE=1 SV=1		6573_0:004831	12003at6447	uncharacterized protein LOC106056741
TRINITY_DN10090_c0_g1_i1						6526_0:005576	1519587at2759	uncharacterized protein LOC106466994
TRINITY_DN100902_c0_g1_i1	sp|Q14D04|MELT_HUMAN	Q14D04	GO:0060392; GO:0010314; GO:0030512; GO:0005515; GO:0005886; GO:0009966; GO:0016020	Ventricular zone-expressed PH domain-containing protein homolog 1 OS=Homo sapiens OX=9606 GN=VEPH1 PE=1 SV=1		6565_0:004d3a	139521at2759	Ventricular zone expressed PH domain containing 1
TRINITY_DN100904_c0_g1_i1	sp|Q98948|SSBP3_CHICK	Q98948	GO:0003677; GO:0003697; GO:0045944; GO:0005634	Single-stranded DNA-binding protein 3 OS=Gallus gallus OX=9031 GN=SSBP3 PE=2 SV=3	PF04503.13	37653_0:001fe8	387814at33208	single-stranded DNA-binding protein 3
TRINITY_DN100905_c0_g1_i1	sp|Q14703|MBTP1_HUMAN	Q14703	GO:0008236; GO:0016787; GO:0008202; GO:0006508; GO:0005783; GO:0034976; GO:0031293; GO:0006629; GO:0008233; GO:0016021; GO:0005794; GO:0036500; GO:0060627; GO:0016020; GO:0007040; GO:0004252; GO:0008203	Membrane-bound transcription factor site-1 protease OS=Homo sapiens OX=9606 GN=MBTPS1 PE=1 SV=1		6565_0:004324	340650at2759	membrane-bound transcription factor site-1 protease	R-HSA-1655829; R-HSA-381033; R-HSA-381426; R-HSA-8874211; R-HSA-8874211; R-HSA-8957275; R-HSA-8963889	Regulation of cholesterol biosynthesis by SREBP (SREBF); ATF6 (ATF6-alpha) activates chaperones; Regulation of Insulin-like Growth Factor (IGF) transport and uptake by Insulin-like Growth Factor Binding Proteins (IGFBPs); CREB3 factors activate genes; CREB3 factors activate genes; Post-translational protein phosphorylation; Assembly of active LPL and LIPC lipase complexes
TRINITY_DN100913_c0_g1_i1	sp|P40222|TXLNA_HUMAN	P40222	GO:0005829; GO:0019221; GO:0005515; GO:0005737; GO:0006887	Alpha-taxilin OS=Homo sapiens OX=9606 GN=TXLNA PE=1 SV=3	PF08614.11; PF09728.9; PF07889.12; PF06156.13; PF00769.19; PF05478.11	29159_0:002532	532685at33208	alpha-taxilin	R-HSA-449836	Other interleukin signaling
TRINITY_DN100921_c0_g1_i1	sp|P08962|CD63_HUMAN	P08962	GO:2001046; GO:0005765; GO:0005887; GO:0048757; GO:1900746; GO:0031226; GO:0032585; GO:0035646; GO:0097487; GO:0005764; GO:0016021; GO:0007160; GO:0070062; GO:0005576; GO:0002092; GO:0031902; GO:0005768; GO:0016477; GO:0016020; GO:0005886	CD63 antigen OS=Homo sapiens OX=9606 GN=CD63 PE=1 SV=2		37653_0:000446	1406905at2759	Tetraspanin	R-HSA-114608; R-HSA-6798695	Platelet degranulation ; Neutrophil degranulation
TRINITY_DN100926_c0_g1_i1	sp|O60229|KALRN_HUMAN	O60229	GO:0000166; GO:0005856; GO:0106310; GO:0007417; GO:0004672; GO:0005524; GO:0004674; GO:0005737; GO:0006468; GO:0016740; GO:0016192; GO:0016310; GO:0007165; GO:0015629; GO:0007411; GO:0046872; GO:0007399; GO:0035556; GO:0005085; GO:0016301	Kalirin OS=Homo sapiens OX=9606 GN=KALRN PE=1 SV=2	PF13169.6	225164_0:004c04	4513at33208	kalirin isoform X1	R-HSA-193648; R-HSA-194840; R-HSA-3928662; R-HSA-416476; R-HSA-416482; R-HSA-5687128	NRAGE signals death through JNK; Rho GTPase cycle; EPHB-mediated forward signaling; G alpha (q) signalling events; G alpha (12/13) signalling events; MAPK6/MAPK4 signaling
TRINITY_DN100931_c0_g1_i1						29159_0:002690	1379709at2759	uncharacterized protein LOC111109060
TRINITY_DN100933_c0_g1_i1						6565_0:0080e1	1233632at2759	Reverse transcriptase
TRINITY_DN10094_c0_g1_i1	sp|Q99653|CHP1_HUMAN	Q99653	GO:0006611; GO:0060050; GO:0005886; GO:0006813; GO:0031953; GO:0061024; GO:0005783; GO:0061025; GO:0015630; GO:0031122; GO:0071073; GO:0030214; GO:0007264; GO:0006906; GO:0005515; GO:0005829; GO:0031397; GO:0015459; GO:0051222; GO:0008017; GO:0006903; GO:0051259; GO:0050821	Calcineurin B homologous protein 1 OS=Homo sapiens OX=9606 GN=CHP1 PE=1 SV=3	PF12763.7; PF16844.5; PF08479.11; PF12174.8; PF13405.6; PF13499.6; PF13202.6; PF10591.9; PF13833.6; PF00036.32	29159_0:005d35	1271942at2759	EF-hand domain	R-HSA-2160916	Hyaluronan uptake and degradation
TRINITY_DN100946_c0_g1_i1	sp|Q9NXR8|ING3_HUMAN	Q9NXR8	GO:0035064; GO:0035267; GO:0005654; GO:0043967; GO:0043065; GO:0032777; GO:0000812; GO:0046872; GO:0006325; GO:0005634; GO:0040008; GO:0043968	Inhibitor of growth protein 3 OS=Homo sapiens OX=9606 GN=ING3 PE=1 SV=2		29159_0:002220	1434088at2759	Chromatin modification-related protein	R-HSA-3214847	HATs acetylate histones
TRINITY_DN10095_c0_g1_i3	sp|Q96RW7|HMCN1_HUMAN	Q96RW7	GO:0005938; GO:0050896; GO:0007049; GO:0062023; GO:0007156; GO:0005509; GO:0005737; GO:0007601; GO:0005576; GO:0007157; GO:0009617; GO:0005201; GO:0005515; GO:0070062; GO:0005604; GO:0030054; GO:0051301; GO:0005912	Hemicentin-1 OS=Homo sapiens OX=9606 GN=HMCN1 PE=1 SV=2	PF00047.25; PF08205.12; PF16680.5; PF13895.6; PF07679.16; PF16706.5; PF13927.6	8128_0:001d3f	22908at7898	B-cell receptor CD22-like
TRINITY_DN100957_c0_g1_i1						6565_0:004718	10382at6447	HTH CenpB-type DNA-binding domain
TRINITY_DN100967_c0_g1_i1					PF06623.11
TRINITY_DN100976_c0_g1_i1						29159_0:000ac5	1598at6447	Golgin subfamily A member 3
TRINITY_DN10098_c0_g1_i2	sp|Q4V838|LTV1_XENLA	Q4V838	GO:0042274	Protein LTV1 homolog OS=Xenopus laevis OX=8355 GN=ltv1 PE=2 SV=1	PF04180.14	6565_0:001492	403171at33208	protein LTV1 homolog
TRINITY_DN100989_c0_g1_i1						6500_0:000014	3478at6447	uncharacterized protein LOC101862618
TRINITY_DN10099_c0_g1_i6	sp|A8IW99|PLD6_CHLRE	A8IW99	GO:0016787; GO:0005741; GO:0051321; GO:0004519; GO:0006629; GO:0016042; GO:0016021; GO:0046872; GO:0004518; GO:0003824; GO:0016020; GO:0005739; GO:0090305	Mitochondrial cardiolipin hydrolase OS=Chlamydomonas reinhardtii OX=3055 GN=CHLREDRAFT_190403 PE=3 SV=1	PF00614.22; PF18044.1; PF07894.12; PF13091.6	6573_0:0018ba	1489926at2759	mitochondrial cardiolipin hydrolase
TRINITY_DN100991_c0_g1_i1	sp|Q8N394|TMTC2_HUMAN	Q8N394	GO:0000030; GO:0055074; GO:0005783; GO:0005789; GO:0016740; GO:0016021; GO:0005515; GO:0016020; GO:0035269; GO:0006486; GO:0004169	Protein O-mannosyl-transferase TMTC2 OS=Homo sapiens OX=9606 GN=TMTC2 PE=1 SV=1		259920_0:001663	1320023at2759	transmembrane and TPR repeat-containing protein 3
TRINITY_DN100995_c0_g1_i1	sp|P70610|DOC2B_RAT	P70610	GO:0019905; GO:0031201; GO:0007268; GO:0008104; GO:0048791; GO:0005509; GO:0005737; GO:0032024; GO:0061669; GO:0017158; GO:0005886; GO:0046872; GO:0006887; GO:0045202; GO:0016020; GO:0098793; GO:0005544	Double C2-like domain-containing protein beta OS=Rattus norvegicus OX=10116 GN=Doc2b PE=1 SV=2		6573_0:0009c3	185575at33208	Double C2-like domain-containing protein
TRINITY_DN101_c0_g1_i2	sp|Q9BYK8|HELZ2_HUMAN	Q9BYK8	GO:0019216; GO:0000166; GO:0003677; GO:0016787; GO:0030374; GO:0004386; GO:0005524; GO:0005737; GO:0005654; GO:0090501; GO:0003723; GO:0000184; GO:0005515; GO:0003724; GO:0045944; GO:0004540; GO:0046872; GO:0005634; GO:0016020	Helicase with zinc finger domain 2 OS=Homo sapiens OX=9606 GN=HELZ2 PE=1 SV=6	PF13401.6; PF00270.29; PF04851.15; PF02562.16; PF13087.6; PF13361.6; PF13086.6; PF13245.6; PF06745.13; PF09848.9; PF17849.1; PF01443.18; PF13604.6; PF00773.19	6573_0:002748	12238at6447	helicase with zinc finger domain 2-like	R-HSA-1368082; R-HSA-1368108; R-HSA-1989781; R-HSA-1989781; R-HSA-2151201; R-HSA-2426168; R-HSA-381340; R-HSA-381340; R-HSA-400206; R-HSA-400253	RORA activates gene expression; BMAL1:CLOCK,NPAS2 activates circadian gene expression; PPARA activates gene expression; PPARA activates gene expression; Transcriptional activation of mitochondrial biogenesis; Activation of gene expression by SREBF (SREBP); Transcriptional regulation of white adipocyte differentiation; Transcriptional regulation of white adipocyte differentiation; Regulation of li…
TRINITY_DN1010_c0_g1_i1	sp|Q9HAR2|AGRL3_HUMAN	Q9HAR2	GO:0005911; GO:0030424; GO:0007186; GO:0007420; GO:0098742; GO:0005887; GO:0007189; GO:0004930; GO:0016021; GO:0005515; GO:0005886; GO:0098978; GO:0030054; GO:0007416; GO:0030246	Adhesion G protein-coupled receptor L3 OS=Homo sapiens OX=9606 GN=ADGRL3 PE=1 SV=2	PF01825.21; PF02793.22; PF00002.24; PF18358.1; PF00084.20; PF16489.5	6573_0:000eb9	15701at6447	GPCR, family 2-like
TRINITY_DN1010_c0_g2_i1	sp|Q9HAR2|AGRL3_HUMAN	Q9HAR2	GO:0005911; GO:0030424; GO:0007186; GO:0007420; GO:0098742; GO:0005887; GO:0007189; GO:0004930; GO:0016021; GO:0005515; GO:0005886; GO:0098978; GO:0030054; GO:0007416; GO:0030246	Adhesion G protein-coupled receptor L3 OS=Homo sapiens OX=9606 GN=ADGRL3 PE=1 SV=2	PF01825.21; PF02793.22; PF00002.24; PF18358.1; PF00084.20; PF16489.5	6573_0:000eb9	15701at6447	GPCR, family 2-like
TRINITY_DN1010_c0_g3_i1	sp|Q9HAR2|AGRL3_HUMAN	Q9HAR2	GO:0005911; GO:0030424; GO:0007186; GO:0007420; GO:0098742; GO:0005887; GO:0007189; GO:0004930; GO:0016021; GO:0005515; GO:0005886; GO:0098978; GO:0030054; GO:0007416; GO:0030246	Adhesion G protein-coupled receptor L3 OS=Homo sapiens OX=9606 GN=ADGRL3 PE=1 SV=2	PF01825.21; PF02439.15; PF02793.22; PF00002.24; PF00084.20; PF16489.5	6573_0:000eb9	15701at6447	GPCR, family 2-like
TRINITY_DN10100_c0_g1_i1						6573_0:00105d	16335at6447	uncharacterized protein LOC109618122
TRINITY_DN10100_c0_g2_i2						225164_0:000e2b	1260388at2759	Reverse transcriptase
TRINITY_DN10100_c0_g3_i1						225164_0:000e2b	1260388at2759	Reverse transcriptase
TRINITY_DN101005_c0_g1_i1	sp|Q6Z1C0|NUCL1_ORYSJ	Q6Z1C0	GO:0006364; GO:1990904; GO:0003676; GO:0003723; GO:0005634; GO:0005730	Nucleolin 1 OS=Oryza sativa subsp. japonica OX=39947 GN=Os08g0192900 PE=2 SV=1		10228_0:0015af	1202220at2759	RNA-binding domain superfamily
TRINITY_DN101007_c0_g1_i1						29159_0:000783	10953at33208	vacuolar protein sorting-associated protein 13D isoform X1
TRINITY_DN10101_c1_g1_i1					PF03120.16; PF08402.10
TRINITY_DN101018_c0_g1_i1	sp|Q5PPV2|TEKT4_XENLA	Q5PPV2	GO:0031514; GO:0042995; GO:0030030; GO:0005929	Tektin-4 OS=Xenopus laevis OX=8355 GN=tekt4 PE=2 SV=1		29159_0:005ca0	264325at33208	tektin-2
TRINITY_DN101032_c0_g1_i1						7574_0:0000fe	651316at2759	B-box-type zinc finger
TRINITY_DN101034_c0_g1_i1						6573_0:000b0e	1010730at2759	serine/threonine-protein kinase RIO2
TRINITY_DN101036_c0_g1_i1	sp|Q8K3K1|USH2A_RAT	Q8K3K1	GO:1990696; GO:0001917; GO:0032391; GO:0005886; GO:0005604; GO:0045184; GO:0016020; GO:0005576; GO:0043195; GO:0045202; GO:0007605; GO:0016477; GO:0043025; GO:0009887; GO:0050896; GO:0042995; GO:0007601; GO:1990075; GO:0034446; GO:0032420; GO:0009888; GO:0002142; GO:0002141	Usherin OS=Rattus norvegicus OX=10116 GN=Ush2a PE=1 SV=2		133434_0:002a08	4049at33208	usherin
TRINITY_DN10104_c0_g1_i2					PF01348.21; PF00176.23; PF17363.2; PF08621.10; PF06738.12; PF01785.17; PF02319.20; PF07361.11; PF13135.6; PF18008.1
TRINITY_DN101042_c0_g1_i1	sp|Q07954|LRP1_HUMAN	Q07954	GO:0005769; GO:1900223; GO:0005044; GO:0097242; GO:0006898; GO:0001540; GO:0031623; GO:0006629; GO:0005515; GO:0005041; GO:0032050; GO:0043395; GO:0030226; GO:0150104; GO:0150094; GO:0045807	Prolow-density lipoprotein receptor-related protein 1 OS=Homo sapiens OX=9606 GN=LRP1 PE=1 SV=2		34882_0:003efb	131at314145	prolow-density lipoprotein receptor-related protein 1	R-HSA-2168880; R-HSA-975634	Scavenging of heme from plasma; Retinoid metabolism and transport
TRINITY_DN101045_c0_g1_i1	sp|Q7PYQ5|FAM50_ANOGA	Q7PYQ5	GO:0005634; GO:0006325	Protein FAM50 homolog OS=Anopheles gambiae OX=7165 GN=AGAP002062 PE=3 SV=2		29159_0:006133	1061864at2759	protein FAM50A
TRINITY_DN101049_c0_g1_i1	sp|Q9Z2K9|IDHC_MICME	Q9Z2K9	GO:0006097; GO:0000287; GO:0004450; GO:0005737; GO:0016616; GO:0016491; GO:0051287; GO:0046872; GO:0006099; GO:0005829; GO:0006102; GO:0006103	Isocitrate dehydrogenase [NADP] cytoplasmic OS=Microtus mexicanus OX=79689 GN=IDH1 PE=2 SV=1		114398_0:003719	1594at6893	Isocitrate dehydrogenase
TRINITY_DN10105_c0_g1_i1	sp|Q21313|EPI1_CAEEL	Q21313	GO:0051788; GO:0009888; GO:0040017; GO:0007155; GO:0001764; GO:0000003; GO:0010950; GO:0005201; GO:0007414; GO:0007411; GO:0005604; GO:0042127; GO:0071711; GO:0016477; GO:0009408; GO:0009887	Laminin-like protein epi-1 OS=Caenorhabditis elegans OX=6239 GN=epi-1 PE=1 SV=1	PF13385.6; PF02210.24; PF06009.12; PF12296.8; PF00054.23; PF01519.16	6573_0:001393	1919at33208	laminin subunit alpha-4	R-CEL-3000157	Laminin interactions
TRINITY_DN101051_c0_g1_i1						29159_0:004d32	1305649at2759	Class I glutamine amidotransferase-like protein
TRINITY_DN101054_c0_g1_i1	sp|Q3U1J1|TFPT_MOUSE	Q3U1J1	GO:0003677; GO:0005654; GO:0019901; GO:0005737; GO:0006915; GO:0005884; GO:0006281; GO:0031011; GO:0006974; GO:0005634; GO:0043065; GO:0006310; GO:0044877; GO:0097190	TCF3 fusion partner homolog OS=Mus musculus OX=10090 GN=Tfpt PE=1 SV=1		6500_0:004526	1333990at2759	High mobility group box domain	R-MMU-5689603; R-MMU-5696394	UCH proteinases; DNA Damage Recognition in GG-NER
TRINITY_DN101060_c0_g1_i1	sp|Q5UQN4|YL432_MIMIV	Q5UQN4	GO:0016787	Uncharacterized protein L432 OS=Acanthamoeba polyphaga mimivirus OX=212035 GN=MIMI_L432 PE=4 SV=1		6573_0:0005af	10974at1206795	uncharacterized protein LOC106156700
TRINITY_DN10107_c0_g1_i2	sp|Q9WVF7|DPOE1_MOUSE	Q9WVF7	GO:0000082; GO:0000731; GO:0003677; GO:0016787; GO:0005654; GO:0016779; GO:0003682; GO:0006281; GO:0016740; GO:0005886; GO:0046872; GO:0003887; GO:0006974; GO:0008622; GO:0005634; GO:0048568; GO:0071897; GO:0006260; GO:0051536; GO:0051539	DNA polymerase epsilon catalytic subunit A OS=Mus musculus OX=10090 GN=Pole PE=1 SV=3	PF03104.19; PF00136.21; PF13482.6; PF08490.12; PF10108.9	6573_0:00068c	16244at33208	DNA polymerase epsilon catalytic subunit A	R-MMU-110314; R-MMU-174430; R-MMU-5651801; R-MMU-5656169; R-MMU-5685942; R-MMU-5696397; R-MMU-5696400; R-MMU-6782135; R-MMU-6782210; R-MMU-68952; R-MMU-68962	Recognition of DNA damage by PCNA-containing replication complex; Telomere C-strand synthesis initiation; PCNA-Dependent Long Patch Base Excision Repair; Termination of translesion DNA synthesis; HDR through Homologous Recombination (HRR); Gap-filling DNA repair synthesis and ligation in GG-NER; Dual Incision in GG-NER; Dual incision in TC-NER; Gap-filling DNA repair synthesis and ligation in TC-…
TRINITY_DN101080_c0_g1_i1	sp|O82018|CALM_MOUSC	O82018	GO:0005509; GO:0046872	Calmodulin OS=Mougeotia scalaris OX=13158 PE=2 SV=3		10228_0:002731	1386217at2759	calmodulin
TRINITY_DN101089_c0_g1_i1						6573_0:0014ed	11811at1206795	uncharacterized protein LOC106154462
TRINITY_DN10109_c0_g1_i1	sp|Q91060|TBA_NOTVI	Q91060	GO:0000166; GO:0005856; GO:0005874; GO:0005737; GO:0007017; GO:0003924; GO:0005200; GO:0007010; GO:0005525	Tubulin alpha chain OS=Notophthalmus viridescens OX=8316 PE=2 SV=1		80972_0:003f93	195810at7742	Tubulin alpha chain
TRINITY_DN10109_c1_g1_i1	sp|P68362|TBA1A_CRIGR	P68362	GO:0055037; GO:0000166; GO:0005856; GO:0005874; GO:0005737; GO:0007017; GO:0050807; GO:0003924; GO:0036464; GO:0005200; GO:0042802; GO:0015630; GO:0005881; GO:0031594; GO:0005525; GO:0007010	Tubulin alpha-1A chain OS=Cricetulus griseus OX=10029 GN=TUBA1A PE=2 SV=1		7741_0:004ef5	275336at33208	Tubulin alpha chain
TRINITY_DN10109_c2_g1_i1	sp|Q06331|TBA_ENTDO	Q06331	GO:0000166; GO:0005856; GO:0005874; GO:0005737; GO:0007017; GO:0003924; GO:0005200; GO:0007010; GO:0005525	Tubulin alpha chain OS=Enteroctopus dofleini OX=267067 PE=2 SV=1	PF00091.25	37653_0:001021	1765at6447	Tubulin alpha chain
TRINITY_DN10109_c3_g1_i1	sp|P06603|TBA1_DROME	P06603	GO:0000278; GO:0032418; GO:0005856; GO:0005874; GO:0048471; GO:0005737; GO:0007017; GO:0003924; GO:0005813; GO:0005634; GO:0005200; GO:0005819; GO:0000235; GO:0000226; GO:0005525	Tubulin alpha-1 chain OS=Drosophila melanogaster OX=7227 GN=alphaTub84B PE=1 SV=1		1218281_0:0022da	275336at33208	Tubulin alpha chain	R-DME-3371497; R-DME-6807878; R-DME-6811434; R-DME-6811436; R-DME-983189	HSP90 chaperone cycle for steroid hormone receptors (SHR); COPI-mediated anterograde transport; COPI-dependent Golgi-to-ER retrograde traffic; COPI-independent Golgi-to-ER retrograde traffic; Kinesins
TRINITY_DN1011_c0_g1_i2	sp|Q8N0N3|BGBP_PENMO	Q8N0N3	GO:0001872; GO:0045087; GO:0005576; GO:0002376; GO:0004553; GO:0005975	Beta-1,3-glucan-binding protein OS=Penaeus monodon OX=6687 PE=2 SV=1	PF00722.21; PF15886.5	6526_0:00467a	1209387at2759	Xyloglucan endotransglucosylase/hydrolase
TRINITY_DN1011_c0_g2_i1	sp|Q8N0N3|BGBP_PENMO	Q8N0N3	GO:0001872; GO:0045087; GO:0005576; GO:0002376; GO:0004553; GO:0005975	Beta-1,3-glucan-binding protein OS=Penaeus monodon OX=6687 PE=2 SV=1	PF00722.21	6500_0:0044ad	1209387at2759	Xyloglucan endotransglucosylase/hydrolase
TRINITY_DN1011_c0_g3_i1	sp|Q8N0N3|BGBP_PENMO	Q8N0N3	GO:0001872; GO:0045087; GO:0005576; GO:0002376; GO:0004553; GO:0005975	Beta-1,3-glucan-binding protein OS=Penaeus monodon OX=6687 PE=2 SV=1	PF00722.21	6500_0:0044ad	1209387at2759	Xyloglucan endotransglucosylase/hydrolase
TRINITY_DN101101_c0_g1_i1	sp|Q3SZN3|OMA1_BOVIN	Q3SZN3	GO:0002024; GO:0140468; GO:0008237; GO:1903850; GO:0005743; GO:0016540; GO:0031966; GO:0010637; GO:0006515; GO:0097009; GO:0140467; GO:0006006; GO:0033108; GO:0005739; GO:0043065; GO:0004222; GO:0034982	Metalloendopeptidase OMA1, mitochondrial OS=Bos taurus OX=9913 GN=OMA1 PE=2 SV=2		10228_0:0010a2	524811at33208	metalloendopeptidase OMA1, mitochondrial	R-BTA-169911	Regulation of Apoptosis
TRINITY_DN101109_c0_g1_i1	sp|B3S3D5|DDRGK_TRIAD	B3S3D5		DDRGK domain-containing protein 1 OS=Trichoplax adhaerens OX=10228 GN=TRIADDRAFT_58679 PE=3 SV=1	PF11067.8; PF15396.6; PF01080.17; PF11600.8; PF08704.10; PF07267.11; PF11744.8; PF17846.1; PF02862.17; PF08597.10; PF11443.8; PF09756.9; PF06459.12; PF08192.11; PF12569.8; PF18168.1	225164_0:001c82	10417at6447	Winged helix-like DNA-binding domain superfamily
TRINITY_DN10112_c2_g1_i7					PF14362.6; PF10205.9; PF02048.16; PF01166.18; PF09744.9; PF11068.8; PF09769.9; PF11559.8; PF06156.13; PF07200.13; PF07889.12; PF15346.6	6565_0:006896	19260at1206795	uncharacterized protein LOC111110175
TRINITY_DN101136_c0_g1_i1	sp|Q09YK0|MET_MUNMU	Q09YK0	GO:2001028; GO:0000166; GO:0071526; GO:0005524; GO:0004672; GO:0017154; GO:0050918; GO:0006468; GO:0016310; GO:0016021; GO:0004713; GO:0007169; GO:0016020; GO:0018108; GO:0004714; GO:0016301	Hepatocyte growth factor receptor OS=Muntiacus muntjak OX=9888 GN=MET PE=3 SV=1		6565_0:002aff	140at1206795	fibrocystin-L-like
TRINITY_DN101139_c0_g1_i1	sp|Q8T5G8|CHS_MELAT	Q8T5G8	GO:0016757; GO:0016758; GO:0016740; GO:0016021; GO:0009792; GO:0004100; GO:0005886; GO:0016020	Chitin synthase OS=Meloidogyne artiellia OX=42426 PE=1 SV=1	PF18485.1	6573_0:0003ac	118694at2759	uncharacterized protein LOC111128135
TRINITY_DN10114_c0_g1_i4	sp|Q9VPW8|PINO_DROME	Q9VPW8	GO:0007608; GO:0042048; GO:0050896	Protein pinocchio OS=Drosophila melanogaster OX=7227 GN=Pino PE=2 SV=1	PF06906.11; PF03833.13; PF02132.15	6573_0:005a6b	10282at1206795	uncharacterized protein LOC106074194
TRINITY_DN101141_c0_g1_i1	sp|P50904|RASA1_RAT	P50904	GO:0046580; GO:0071364; GO:0005096; GO:0043547; GO:0090630; GO:0007165; GO:0005737; GO:0042493; GO:0005102; GO:0001934; GO:0031965; GO:0005886; GO:0036120; GO:0005829; GO:0005515; GO:0016020; GO:0005161; GO:0043087; GO:0044877; GO:0000281	Ras GTPase-activating protein 1 OS=Rattus norvegicus OX=10116 GN=Rasa1 PE=3 SV=1		6565_0:0030b7	145372at2759	Ras GTPase-activating domain	R-RNO-186763; R-RNO-3928662; R-RNO-5218921; R-RNO-5658442; R-RNO-8849471	Downstream signal transduction; EPHB-mediated forward signaling; VEGFR2 mediated cell proliferation; Regulation of RAS by GAPs; PTK6 Regulates RHO GTPases, RAS GTPase and MAP kinases
TRINITY_DN101147_c0_g1_i1					PF00047.25; PF07679.16; PF13927.6; PF18452.1; PF13895.6	1720309_0:001913	1047682at2759	retinoschisin
TRINITY_DN101149_c0_g1_i1	sp|P22329|OPSR_CHICK	P22329	GO:0016039; GO:0070207; GO:0060342; GO:0016021; GO:0007602; GO:0005794; GO:0016020; GO:0031982; GO:0042803; GO:0007165; GO:0050896; GO:0009584; GO:0007601; GO:0016037; GO:0004930; GO:0009881; GO:0018298; GO:0044297; GO:0007186; GO:0016038; GO:0031404; GO:0001750	Red-sensitive opsin OS=Gallus gallus OX=9031 PE=1 SV=1		6850_0:001ceb	310934at33208	visual pigment-like receptor peropsin
TRINITY_DN101152_c0_g1_i1	sp|Q9W2S3|BTBD9_DROME	Q9W2S3	GO:0032225; GO:0008344; GO:0005737; GO:0050804; GO:0045938; GO:0048512	BTB/POZ domain-containing protein 9 OS=Drosophila melanogaster OX=7227 GN=BTBD9 PE=1 SV=1		400682_0:0002fc	1382924at2759	Ankyrin
TRINITY_DN101153_c0_g1_i1	sp|Q9VWH4|IDH3A_DROME	Q9VWH4	GO:0004449; GO:0000287; GO:0016616; GO:0051287; GO:0046872; GO:0006099; GO:0006102; GO:0005739; GO:0016491	Probable isocitrate dehydrogenase [NAD] subunit alpha, mitochondrial OS=Drosophila melanogaster OX=7227 GN=l(1)G0156 PE=2 SV=1		6573_0:0024a3	325037at33208	isocitrate dehydrogenase	R-DME-71403	Citric acid cycle (TCA cycle)
TRINITY_DN101154_c0_g1_i1	sp|Q14703|MBTP1_HUMAN	Q14703	GO:0008236; GO:0016787; GO:0008202; GO:0006508; GO:0005783; GO:0034976; GO:0031293; GO:0006629; GO:0008233; GO:0016021; GO:0005794; GO:0036500; GO:0060627; GO:0016020; GO:0007040; GO:0004252; GO:0008203	Membrane-bound transcription factor site-1 protease OS=Homo sapiens OX=9606 GN=MBTPS1 PE=1 SV=1	PF06305.11	6565_0:004324	340650at2759	membrane-bound transcription factor site-1 protease	R-HSA-1655829; R-HSA-381033; R-HSA-381426; R-HSA-8874211; R-HSA-8874211; R-HSA-8957275; R-HSA-8963889	Regulation of cholesterol biosynthesis by SREBP (SREBF); ATF6 (ATF6-alpha) activates chaperones; Regulation of Insulin-like Growth Factor (IGF) transport and uptake by Insulin-like Growth Factor Binding Proteins (IGFBPs); CREB3 factors activate genes; CREB3 factors activate genes; Post-translational protein phosphorylation; Assembly of active LPL and LIPC lipase complexes
TRINITY_DN101157_c0_g1_i1					PF05337.11
TRINITY_DN10116_c0_g4_i1	sp|Q9UBZ9|REV1_HUMAN	Q9UBZ9	GO:0003677; GO:0003684; GO:0005654; GO:0042276; GO:0019985; GO:0005515; GO:0006974; GO:0005634; GO:0071897; GO:0006260	DNA repair protein REV1 OS=Homo sapiens OX=9606 GN=REV1 PE=1 SV=1	PF15708.5; PF08827.11; PF00817.20; PF16727.5; PF14377.6; PF11798.8; PF11799.8	6573_0:000ac3	1552at6447	DNA repair protein REV1	R-HSA-110312; R-HSA-5655862; R-HSA-5656121; R-HSA-5656169	Translesion synthesis by REV1; Translesion synthesis by POLK; Translesion synthesis by POLI; Termination of translesion DNA synthesis
TRINITY_DN101161_c0_g1_i1	sp|Q58DC5|GTPB1_BOVIN	Q58DC5	GO:0000166; GO:0006414; GO:0005737; GO:0003924; GO:0046039; GO:0005829; GO:0000177; GO:0003746; GO:0061014; GO:0005525	GTP-binding protein 1 OS=Bos taurus OX=9913 GN=GTPBP1 PE=2 SV=2		568069_0:0008a3	18262at7147	GTP-binding protein 1
TRINITY_DN101163_c0_g1_i1	sp|P21146|ARBK1_BOVIN	P21146	GO:0007186; GO:0000166; GO:0046718; GO:0005524; GO:0002029; GO:0004674; GO:0005737; GO:0060048; GO:0018107; GO:0016310; GO:0045988; GO:0005515; GO:0031755; GO:0031623; GO:1901081; GO:0018105; GO:0019079; GO:0007217; GO:0047696; GO:0003108; GO:0016020	Beta-adrenergic receptor kinase 1 OS=Bos taurus OX=9913 GN=GRK2 PE=1 SV=1		29159_0:005a6b	1104340at2759	G protein-coupled receptor kinase
TRINITY_DN10117_c0_g2_i2	sp|Q8BKT8|HAUS7_MOUSE	Q8BKT8	GO:0070652; GO:0005856; GO:0005874; GO:0007049; GO:0005737; GO:0051225; GO:0005813; GO:0031996; GO:0051301; GO:0003674; GO:0051011; GO:1990498; GO:0007098	HAUS augmin-like complex subunit 7 OS=Mus musculus OX=10090 GN=Haus7 PE=1 SV=2	PF06694.11	6573_0:003fa6	1184888at2759	HAUS augmin-like complex subunit 7	R-MMU-2565942; R-MMU-380259; R-MMU-380270; R-MMU-380284; R-MMU-380320; R-MMU-5620912; R-MMU-8854518	Regulation of PLK1 Activity at G2/M Transition; Loss of Nlp from mitotic centrosomes; Recruitment of mitotic centrosome proteins and complexes; Loss of proteins required for interphase microtubule organization from the centrosome; Recruitment of NuMA to mitotic centrosomes; Anchoring of the basal body to the plasma membrane; AURKA Activation by TPX2
TRINITY_DN101173_c0_g1_i1	sp|P33121|ACSL1_HUMAN	P33121	GO:0004467; GO:0043231; GO:0000038; GO:0015908; GO:0035338; GO:0005741; GO:0005524; GO:0005783; GO:0001676; GO:0016874; GO:0047676; GO:0008610; GO:0090434; GO:0006629; GO:0005777; GO:0044539; GO:0010747; GO:0016020; GO:0005739; GO:0050197	Long-chain-fatty-acid--CoA ligase 1 OS=Homo sapiens OX=9606 GN=ACSL1 PE=1 SV=1		6573_0:0003c3	2528at6447	long-chain-fatty-acid--CoA ligase 5-like	R-HSA-1989781; R-HSA-2046105; R-HSA-2046106; R-HSA-75876	PPARA activates gene expression; Linoleic acid (LA) metabolism; alpha-linolenic acid (ALA) metabolism; Synthesis of very long-chain fatty acyl-CoAs
TRINITY_DN101186_c0_g1_i1					PF01629.16
TRINITY_DN101189_c0_g1_i1					PF04509.12
TRINITY_DN101195_c0_g1_i1	sp|Q5BJQ2|MINY1_RAT	Q5BJQ2	GO:0008234; GO:0016787; GO:0036435; GO:0006508; GO:0071944; GO:0004843; GO:0008150; GO:0016807; GO:0005654; GO:0008233; GO:0005575; GO:0005829; GO:0003674; GO:0071108; GO:0016604; GO:1990380; GO:0018215	Ubiquitin carboxyl-terminal hydrolase MINDY-1 OS=Rattus norvegicus OX=10116 GN=Mindy1 PE=2 SV=1		37621_0:00356e	1601180at2759	MINDY deubiquitinase
TRINITY_DN1012_c0_g1_i9					PF11022.8	1676925_0:000dcf	298823at33208	tumor necrosis factor receptor superfamily member 19
TRINITY_DN1012_c0_g2_i1					PF16477.5	6573_0:000d66	1663at6447	uncharacterized protein LOC111125848
TRINITY_DN10120_c0_g1_i1	sp|G9JJU2|GPX_PROCL	G9JJU2	GO:0004601; GO:0006979; GO:0004602; GO:0098869; GO:0016491	Glutathione peroxidase OS=Procambarus clarkii OX=6728 GN=GPx PE=2 SV=1	PF00255.19	29159_0:005db6	1483113at2759	Glutathione peroxidase
TRINITY_DN101215_c0_g1_i1	sp|A7T1N0|TMP2L_NEMVE	A7T1N0	GO:0005261; GO:0005887; GO:0015280; GO:0005272; GO:0005262; GO:0098655; GO:0006816; GO:0016021; GO:0005886; GO:0046872; GO:0035725; GO:0019722; GO:0016020; GO:0099604; GO:0006811; GO:0030001; GO:0006814; GO:0070588	Transient receptor potential cation channel subfamily M member-like 2 OS=Nematostella vectensis OX=45351 GN=TRPM2 PE=1 SV=1		225164_0:002f8e	323456at33208	transient receptor potential cation channel subfamily M member 8
TRINITY_DN101222_c0_g1_i1						225164_0:003f10	395206at33208	transforming growth factor-beta-induced protein ig-h3
TRINITY_DN101236_c0_g1_i1	sp|Q1EQW7|LDB2_XENLA	Q1EQW7	GO:0005634; GO:0006357; GO:0003712; GO:0008150; GO:0030274	LIM domain-binding protein 2 OS=Xenopus laevis OX=8355 GN=ldb2 PE=2 SV=1	PF01803.16	224129_0:002869	3405at41084	LIM domain-binding protein 2 isoform X1
TRINITY_DN101238_c0_g1_i1					PF11940.8
TRINITY_DN101241_c0_g1_i1	sp|P98092|HMCT_BOMMO	P98092	GO:0007155; GO:0030246	Hemocytin OS=Bombyx mori OX=7091 PE=2 SV=1		6573_0:004445	12226at2759	otogelin-like protein
TRINITY_DN10125_c0_g1_i1	sp|O43543|XRCC2_HUMAN	O43543	GO:0008094; GO:0003677; GO:0005856; GO:0033063; GO:0005524; GO:0005657; GO:0006281; GO:0000400; GO:0000724; GO:0005813; GO:0006974; GO:0042148; GO:0000278; GO:0007098	DNA repair protein XRCC2 OS=Homo sapiens OX=9606 GN=XRCC2 PE=1 SV=1	PF13481.6; PF13479.6; PF08423.11	29159_0:0046cb	10003at1206795	uncharacterized protein LOC101851788	R-HSA-5685942; R-HSA-5693554; R-HSA-5693568; R-HSA-5693579; R-HSA-5693616	HDR through Homologous Recombination (HRR); Resolution of D-loop Structures through Synthesis-Dependent Strand Annealing (SDSA); Resolution of D-loop Structures through Holliday Junction Intermediates; Homologous DNA Pairing and Strand Exchange; Presynaptic phase of homologous DNA pairing and strand exchange
TRINITY_DN10127_c0_g1_i2	sp|Q3T0K8|EMC4_BOVIN	Q3T0K8	GO:0030176; GO:0072546; GO:0032977; GO:0045050; GO:0071816; GO:0005783; GO:0006915; GO:0005789; GO:0016021; GO:0016020	ER membrane protein complex subunit 4 OS=Bos taurus OX=9913 GN=EMC4 PE=2 SV=1		6573_0:001894	1623701at2759	ER membrane protein complex subunit 4
TRINITY_DN101273_c0_g1_i1						29159_0:000c61	56043at33208	plexin-B2
TRINITY_DN101274_c0_g1_i1						6573_0:0013db	1439041at2759	homeobox protein DBX1
TRINITY_DN10128_c0_g1_i5					PF13314.6; PF05529.12; PF00084.20	8128_0:00091f	31246at33208	sushi, von Willebrand factor type A, EGF and pentraxin domain-containing protein 1
TRINITY_DN10128_c0_g2_i1					PF00084.20	8128_0:00091f	31246at33208	sushi, von Willebrand factor type A, EGF and pentraxin domain-containing protein 1
TRINITY_DN101285_c0_g1_i1	sp|Q5U4A3|WASH1_XENLA	Q5U4A3	GO:0055037; GO:0005769; GO:0003779; GO:0043014; GO:0055038; GO:0015031; GO:0071203; GO:0031901; GO:0034314; GO:0016197; GO:0005829; GO:0005768; GO:0016020; GO:0042147	WASH complex subunit 1 OS=Xenopus laevis OX=8355 GN=washc1 PE=2 SV=1		6573_0:001786	386666at33208	WAS protein family homolog 1
TRINITY_DN101287_c0_g1_i1	sp|B2RW38|CFA58_MOUSE	B2RW38	GO:0008150; GO:0042995; GO:0005856; GO:0003674; GO:0005929	Cilia- and flagella-associated protein 58 OS=Mus musculus OX=10090 GN=Cfap58 PE=2 SV=1		10224_0:0017c4	1077673at2759	cilia- and flagella-associated protein 58
TRINITY_DN101293_c0_g1_i1						56723_0:005e5b	120652at33208	Ribonuclease H superfamily
TRINITY_DN101297_c0_g1_i1	sp|Q5ZLT7|BZW1_CHICK	Q5ZLT7	GO:0005737	Basic leucine zipper and W2 domain-containing protein 1 OS=Gallus gallus OX=9031 GN=BZW1 PE=2 SV=1		6565_0:000992	383363at33208	basic leucine zipper and W2 domain-containing protein 2
TRINITY_DN1013_c0_g1_i8	sp|Q3THK7|GUAA_MOUSE	Q3THK7	GO:0000166; GO:0006164; GO:0016462; GO:0005524; GO:0005737; GO:0016874; GO:0003921; GO:0003922; GO:0005829; GO:0006541; GO:0006177	GMP synthase [glutamine-hydrolyzing] OS=Mus musculus OX=10090 GN=Gmps PE=1 SV=2	PF03054.16; PF07685.14; PF02568.14; PF00764.19; PF07722.13; PF01507.19; PF01171.20; PF02540.17; PF00117.28; PF06508.13; PF00733.21; PF00958.22	6526_0:002ea7	1297at6447	GMP synthase	R-MMU-73817	Purine ribonucleoside monophosphate biosynthesis
TRINITY_DN101321_c0_g1_i1	sp|Q15262|PTPRK_HUMAN	Q15262	GO:0043231; GO:0006470; GO:0016787; GO:0004721; GO:0016311; GO:0004725; GO:0016021; GO:0005886; GO:0016791; GO:0005515; GO:0030054; GO:0035335; GO:0016020; GO:0005912	Receptor-type tyrosine-protein phosphatase kappa OS=Homo sapiens OX=9606 GN=PTPRK PE=1 SV=2		6573_0:005272	411281at2759	Tyrosine-protein phosphatase non-receptor type	R-HSA-182971	EGFR downregulation
TRINITY_DN101330_c0_g1_i1						6573_0:0026b1	20at6447	LOW QUALITY PROTEIN: hydrocephalus-inducing protein homolog
TRINITY_DN101338_c0_g1_i1	sp|Q2M3M2|SC5A9_HUMAN	Q2M3M2	GO:0055085; GO:0005412; GO:1904659; GO:0005886; GO:0070062; GO:0016021; GO:0008645; GO:0022857; GO:0006811; GO:0016020; GO:0006814	Sodium/glucose cotransporter 4 OS=Homo sapiens OX=9606 GN=SLC5A9 PE=1 SV=2		6565_0:003f32	2081at6447	Sodium/myo-inositol cotransporter	R-HSA-189200	Cellular hexose transport
TRINITY_DN101350_c0_g1_i1	sp|Q9Z0Z3|SKP2_MOUSE	Q9Z0Z3	GO:0033148; GO:0006511; GO:0051726; GO:0045087; GO:0005654; GO:0042981; GO:0048661; GO:0019005; GO:1902916; GO:0000086; GO:0043161; GO:0070936; GO:0051607; GO:0005515; GO:0005829; GO:0000209; GO:0042802; GO:0000082; GO:0005730	S-phase kinase-associated protein 2 OS=Mus musculus OX=10090 GN=Skp2 PE=1 SV=1		6573_0:00543a	335990at33208	F-box/WD repeat-containing protein 5	R-MMU-174178; R-MMU-187577; R-MMU-5689880; R-MMU-68949; R-MMU-69231; R-MMU-8939902; R-MMU-8951664; R-MMU-983168	APC/C:Cdh1 mediated degradation of Cdc20 and other APC/C:Cdh1 targeted proteins in late mitosis/early G1; SCF(Skp2)-mediated degradation of p27/p21; Ub-specific processing proteases; Orc1 removal from chromatin; Cyclin D associated events in G1; Regulation of RUNX2 expression and activity; Neddylation; Antigen processing: Ubiquitination & Proteasome degradation
TRINITY_DN101361_c0_g1_i1						6573_0:001485	12412at6447	uncharacterized protein LOC105340362
TRINITY_DN10137_c0_g1_i1	sp|P49411|EFTU_HUMAN	P49411	GO:0070125; GO:0000166; GO:0006414; GO:0016032; GO:0003723; GO:0003924; GO:0005515; GO:0070062; GO:0016020; GO:0005739; GO:0003746; GO:0006412; GO:0005525	Elongation factor Tu, mitochondrial OS=Homo sapiens OX=9606 GN=TUFM PE=1 SV=2	PF03144.25; PF01926.23; PF02492.19; PF00009.27; PF03143.17; PF10662.9	6500_0:00499c	298219at33208	Elongation factor Tu	R-HSA-5389840	Mitochondrial translation elongation
TRINITY_DN10138_c0_g1_i4					PF05501.11; PF16700.5	6565_0:0010a9	411124at33208	uncharacterized protein LOC111109089
TRINITY_DN10138_c0_g3_i1	sp|Q9VFD5|FEM1A_DROME	Q9VFD5	GO:0000151; GO:0005575; GO:0006511; GO:0016567; GO:0051438	Protein fem-1 homolog CG6966 OS=Drosophila melanogaster OX=7227 GN=CG6966 PE=2 SV=2	PF00023.30; PF13637.6; PF13857.6; PF12796.7; PF13606.6; PF05481.12	609295_0:001651	133963at33208	protein fem-1 homolog C	R-DME-8951664	Neddylation
TRINITY_DN101380_c0_g1_i1	sp|Q96MB7|HARB1_HUMAN	Q96MB7	GO:0034451; GO:0016787; GO:0005737; GO:0005886; GO:0046872; GO:0004518; GO:0005634; GO:0005829; GO:0090305	Putative nuclease HARBI1 OS=Homo sapiens OX=9606 GN=HARBI1 PE=1 SV=1		7668_0:003698	308467at33208	putative nuclease HARBI1
TRINITY_DN101384_c0_g1_i1						6573_0:003453	37083at33208	Phospholipid-transporting ATPase
TRINITY_DN10139_c0_g1_i5	sp|Q9Y4E5|ZN451_HUMAN	Q9Y4E5	GO:0061665; GO:2000616; GO:0003714; GO:0005654; GO:0016925; GO:0016605; GO:0030512; GO:0060633; GO:0016740; GO:0005515; GO:0046872; GO:0045944; GO:0005634; GO:0010468	E3 SUMO-protein ligase ZNF451 OS=Homo sapiens OX=9606 GN=ZNF451 PE=1 SV=2	PF04736.12; PF00096.26; PF13912.6; PF18479.1; PF13894.6; PF18475.1	6573_0:004853	10908at6447	uncharacterized protein LOC106063064
TRINITY_DN1014_c1_g1_i2	sp|O61491|FLOT1_DROME	O61491	GO:0070528; GO:0072659; GO:0005198; GO:0008150; GO:0007275; GO:2000049; GO:0002090; GO:0005737; GO:0016600; GO:0005886; GO:0031410; GO:0016020; GO:0045807; GO:0005901; GO:1901890	Flotillin-1 OS=Drosophila melanogaster OX=7227 GN=Flo1 PE=2 SV=1	PF01145.25	6500_0:004555	340567at33208	flotillin-1	R-DME-8849932	Synaptic adhesion-like molecules
TRINITY_DN101401_c0_g1_i1						48498_0:000430	1114912at2759	MULE transposase domain
TRINITY_DN101405_c0_g1_i1	sp|O60476|MA1A2_HUMAN	O60476	GO:0009100; GO:0048286; GO:0016787; GO:0006491; GO:0004571; GO:0016021; GO:0005794; GO:1904381; GO:0070062; GO:0008152; GO:0016798; GO:0007585; GO:0016020; GO:0046872; GO:0006486; GO:0000139	Mannosyl-oligosaccharide 1,2-alpha-mannosidase IB OS=Homo sapiens OX=9606 GN=MAN1A2 PE=1 SV=1	PF11779.8	6573_0:003dc1	1982at6447	mannosyl-oligosaccharide 1,2-alpha-mannosidase IA-like	R-HSA-6811438; R-HSA-964827	Intra-Golgi traffic; Progressive trimming of alpha-1,2-linked mannose residues from Man9/8/7GlcNAc2 to produce Man5GlcNAc2
TRINITY_DN10141_c0_g2_i1	sp|Q9UNS1|TIM_HUMAN	Q9UNS1	GO:0000076; GO:0042752; GO:0031298; GO:0003677; GO:0000785; GO:0035861; GO:0006281; GO:0048478; GO:0072711; GO:0005515; GO:0006974; GO:0042127; GO:0005634; GO:0043111; GO:1905168; GO:0072719; GO:1904976; GO:2000781	Protein timeless homolog OS=Homo sapiens OX=9606 GN=TIMELESS PE=1 SV=2	PF03094.15	29159_0:0031fc	1715at6447	protein timeless homolog	R-HSA-5693607	Processing of DNA double-strand break ends
TRINITY_DN101411_c0_g1_i1						6573_0:004f0b	137593at33208	VWFA and cache domain-containing protein 1
TRINITY_DN10142_c0_g1_i3					PF13597.6; PF13676.6; PF08775.10; PF01582.20	6565_0:002fa5	412970at33208	Toll/interleukin-1 receptor homology (TIR) domain
TRINITY_DN101428_c0_g1_i1					PF13599.6	7668_0:000f9e	197339at33208	glycerophosphodiester phosphodiesterase domain-containing protein 4
TRINITY_DN10143_c1_g1_i3	sp|Q6DCX5|PCFT_XENLA	Q6DCX5	GO:0055085; GO:0016020; GO:0005542; GO:0022857; GO:0016021	Proton-coupled folate transporter OS=Xenopus laevis OX=8355 GN=slc46a1 PE=2 SV=1	PF05928.11; PF07690.16; PF00083.24	6573_0:003d22	333052at33208	Solute carrier family 46 member 3
TRINITY_DN10144_c1_g1_i1	sp|Q24248|ARA_DROME	Q24248	GO:0042693; GO:0035310; GO:0003677; GO:0006355; GO:0000978; GO:0048813; GO:0007275; GO:0030182; GO:0000981; GO:0045926; GO:0005634; GO:0001745; GO:0048468; GO:0006357; GO:0007474; GO:0045893	Homeobox protein araucan OS=Drosophila melanogaster OX=7227 GN=ara PE=1 SV=2	PF03286.14; PF05920.11; PF04931.13; PF00046.29; PF18004.1	6565_0:0040a4	351833at33208	Homeobox domain
TRINITY_DN101443_c0_g1_i1	sp|Q8WZ42|TITIN_HUMAN	Q8WZ42	GO:0010628; GO:0010737; GO:0005524; GO:0030018; GO:0004674; GO:0050714; GO:0004672; GO:0006941; GO:0006468; GO:0005516; GO:0016740; GO:0005515; GO:0070062; GO:0008307; GO:0019899; GO:0002020; GO:0046872; GO:0018108; GO:0006936; GO:0016301	Titin OS=Homo sapiens OX=9606 GN=TTN PE=1 SV=4		6573_0:0033ca	165at33208	titin-like	R-HSA-114608; R-HSA-390522	Platelet degranulation ; Striated Muscle Contraction
TRINITY_DN101444_c0_g1_i1	sp|O77408|OAR1_LYMST	O77408	GO:0007213; GO:0007186; GO:0005887; GO:0007165; GO:0004930; GO:0016021; GO:0005886; GO:0016907; GO:0045202; GO:0016020	Octopamine receptor 1 OS=Lymnaea stagnalis OX=6523 PE=1 SV=1		52612_0:004012	1095345at2759	alpha-1D adrenergic receptor
TRINITY_DN101446_c0_g1_i1	sp|Q8BL66|EEA1_MOUSE	Q8BL66	GO:0005769; GO:0006897; GO:0005737; GO:0044308; GO:0046872; GO:0031410; GO:0005768; GO:0016020; GO:0005969	Early endosome antigen 1 OS=Mus musculus OX=10090 GN=Eea1 PE=1 SV=2		29159_0:005580	128377at33208	early endosome antigen 1	R-MMU-168138	Toll Like Receptor 9 (TLR9) Cascade
TRINITY_DN101447_c0_g1_i1						6573_0:000306	1202at6447	thrombospondin type-1 domain-containing protein 7A-like
TRINITY_DN10145_c0_g1_i3					PF05903.14; PF04970.13	29159_0:004fbf	1602481at2759	lecithin retinol acyltransferase
TRINITY_DN101464_c0_g1_i1	sp|Q0P457|KTI12_DANRE	Q0P457	GO:0002098; GO:0005524; GO:0033588; GO:0006357; GO:0000166	Protein KTI12 homolog OS=Danio rerio OX=7955 GN=kti12 PE=2 SV=2		29159_0:00140f	1300128at2759	protein KTI12 homolog
TRINITY_DN10148_c0_g1_i1	sp|P41366|VMO1_CHICK	P41366	GO:0005615; GO:0005576	Vitelline membrane outer layer protein 1 OS=Gallus gallus OX=9031 GN=VMO1 PE=1 SV=1	PF03762.17	42514_0:003e23	103267at7898	vitelline membrane outer layer protein 1 homolog
TRINITY_DN10149_c0_g1_i1	sp|Q63ZU0|ADA_XENTR	Q63ZU0	GO:0006154; GO:0008270; GO:0060169; GO:0060205; GO:0043103; GO:0009168; GO:0005737; GO:0019239; GO:0005764; GO:0004000; GO:0046103; GO:0005886; GO:0005829; GO:0030054; GO:0009897; GO:0016020; GO:0042110	Adenosine deaminase OS=Xenopus tropicalis OX=8364 GN=ada PE=2 SV=1	PF01979.20; PF00962.22	6573_0:001f37	1045809at2759	Adenine deaminase	R-XTR-74217	Purine salvage
TRINITY_DN101492_c0_g1_i1	sp|Q0VDD8|DYH14_HUMAN	Q0VDD8	GO:0016887; GO:0000166; GO:0005856; GO:0005874; GO:0005524; GO:0042995; GO:0005737; GO:0008569; GO:0051959; GO:0030286; GO:0005858; GO:0060285; GO:0005929; GO:0007018; GO:0003777; GO:0045505	Dynein heavy chain 14, axonemal OS=Homo sapiens OX=9606 GN=DNAH14 PE=2 SV=3		225164_0:0056c6	1492at2759	Dynein heavy chain
TRINITY_DN101495_c0_g1_i1	sp|Q810K3|SGPP2_MOUSE	Q810K3	GO:0016787; GO:0005783; GO:0005789; GO:0070780; GO:0016021; GO:0006670; GO:0042392; GO:0016020; GO:0061469; GO:0046839	Sphingosine-1-phosphate phosphatase 2 OS=Mus musculus OX=10090 GN=Sgpp2 PE=1 SV=1		10047_0:0015c8	118248at9347	sphingosine-1-phosphate phosphatase 1	R-MMU-1660661	Sphingolipid de novo biosynthesis
TRINITY_DN1015_c0_g2_i1					PF16721.5
TRINITY_DN1015_c0_g3_i1	sp|Q9UR07|TF211_SCHPO	Q9UR07	GO:0003677; GO:0016787; GO:0006508; GO:0016779; GO:0003676; GO:0015074; GO:0004190; GO:0016740; GO:0004519; GO:0008233; GO:0003723; GO:0046872; GO:0003964; GO:0004518; GO:0008152; GO:0003824; GO:0003887; GO:0005634; GO:0006278; GO:0006310	Transposon Tf2-11 polyprotein OS=Schizosaccharomyces pombe (strain 972 / ATCC 24843) OX=284812 GN=Tf2-11 PE=3 SV=1		7955_0:004465	195413at33208	uncharacterized protein K02A2.6-like
TRINITY_DN101503_c0_g1_i1					PF13516.6; PF00560.33
TRINITY_DN10151_c0_g1_i4	sp|Q32KL8|TBATA_BOVIN	Q32KL8	GO:0005737; GO:0007275; GO:0005829; GO:0007283; GO:0030154	Protein TBATA OS=Bos taurus OX=9913 GN=TBATA PE=2 SV=1	PF15256.6	6573_0:004177	1111761at2759	uncharacterized protein C4orf17 homolog
TRINITY_DN101510_c0_g1_i1						50429_0:0029b9	120652at33208	Ribonuclease H superfamily
TRINITY_DN101528_c0_g1_i1					PF03710.15
TRINITY_DN10153_c0_g1_i3	sp|Q9GKY8|JPH1_RABIT	Q9GKY8	GO:0005783; GO:0005789; GO:0030314; GO:0016021; GO:0005886; GO:0033017; GO:0016020; GO:0016529	Junctophilin-1 OS=Oryctolagus cuniculus OX=9986 GN=JPH1 PE=2 SV=1	PF02493.20	6573_0:000928	1444at6447	junctophilin-1-like isoform X1
TRINITY_DN10154_c0_g1_i3	sp|Q8CG73|FTM_MOUSE	Q8CG73	GO:0005911; GO:0045744; GO:0036064; GO:0005923; GO:0060039; GO:0005856; GO:0031870; GO:0001736; GO:0035869; GO:0035253; GO:0042995; GO:0005737; GO:0032391; GO:1905515; GO:0046548; GO:0032502; GO:0030054; GO:0005929; GO:0060271	Protein fantom OS=Mus musculus OX=10090 GN=Rpgrip1l PE=1 SV=2	PF11618.8; PF12870.7; PF18111.1; PF00168.30	29159_0:005578	152378at2759	protein fantom isoform X1	R-MMU-5610787; R-MMU-5620912	Hedgehog 'off' state; Anchoring of the basal body to the plasma membrane
TRINITY_DN101549_c0_g1_i1						6573_0:004795	11864at33208	Inositol 1,4,5-trisphosphate receptor
TRINITY_DN101553_c0_g1_i1						6565_0:00339f	15460at6447	uncharacterized protein LOC111118861
TRINITY_DN101555_c0_g1_i1						133434_0:00159c	457046at33208	Zinc finger, RING-type
TRINITY_DN101557_c0_g1_i1	sp|Q2TAQ1|ELP1_XENLA	Q2TAQ1	GO:0005737; GO:0033588; GO:0008033; GO:0005634; GO:0002098	Putative elongator complex protein 1 OS=Xenopus laevis OX=8355 GN=elp1 PE=2 SV=1		7574_0:00080e	112285at33208	Elongator complex protein 1
TRINITY_DN101560_c0_g1_i1						29159_0:0035ec	12201at6447	uncharacterized protein LOC105339555
TRINITY_DN10157_c0_g1_i1					PF12590.8
TRINITY_DN101570_c0_g1_i1						6565_0:000379	12036at6447	TPR and ankyrin repeat-containing protein 1-like isoform X1
TRINITY_DN101577_c0_g1_i1	sp|Q9EQW7|KI13A_MOUSE	Q9EQW7	GO:0032588; GO:0016887; GO:0005874; GO:0005871; GO:0030496; GO:0010008; GO:0072383; GO:0035459; GO:0008333; GO:0006886; GO:1990939; GO:0008017; GO:0005813; GO:0005515; GO:0043001; GO:0032465; GO:0003777; GO:0007018; GO:0032438	Kinesin-like protein KIF13A OS=Mus musculus OX=10090 GN=Kif13a PE=1 SV=1		6573_0:00328a	15699at33208	kinesin-like protein KIF13B
TRINITY_DN10158_c0_g2_i1	sp|Q95NN1|T23O_TRICA	Q95NN1	GO:0006727; GO:0051213; GO:0016491; GO:0046872; GO:0004833; GO:0019441; GO:0006569; GO:0020037	Tryptophan 2,3-dioxygenase OS=Tribolium castaneum OX=7070 PE=2 SV=1	PF03301.13	6565_0:00208b	307028at33208	Tryptophan 2,3-dioxygenase
TRINITY_DN101593_c0_g1_i1						218467_0:001add	18144at6656	NFX1-type zinc finger-containing protein 1-like
TRINITY_DN1016_c0_g1_i3	sp|Q8BGF6|ELMD2_MOUSE	Q8BGF6	GO:0050688; GO:0005096; GO:0043547	ELMO domain-containing protein 2 OS=Mus musculus OX=10090 GN=Elmod2 PE=1 SV=1	PF04727.13; PF13251.6	29159_0:0010e1	1282549at2759	ELMO domain-containing protein 2
TRINITY_DN10160_c0_g1_i2					PF14575.6	29159_0:002eba	11989at6447	uncharacterized protein LOC110457756
TRINITY_DN101609_c0_g1_i1						1608454_0:005b8a	151906at7742	uncharacterized protein K02A2.6-like
TRINITY_DN10161_c0_g1_i1					PF16101.5; PF05454.11; PF09305.10; PF14991.6; PF15820.5; PF16982.5; PF16038.5
TRINITY_DN101619_c0_g1_i1	sp|Q6FJG1|FAL1_CANGA	Q6FJG1	GO:0000462; GO:0042254; GO:0006364; GO:0097078; GO:0016787; GO:0000166; GO:0003676; GO:0004386; GO:0005524; GO:0016887; GO:0003723; GO:0003724; GO:0005634; GO:0030688; GO:0005730	ATP-dependent RNA helicase FAL1 OS=Candida glabrata (strain ATCC 2001 / CBS 138 / JCM 3761 / NBRC 0622 / NRRL Y-65) OX=284593 GN=FAL1 PE=3 SV=1		28612_0:0021e4	31736at7147	eukaryotic initiation factor 4A-III
TRINITY_DN101620_c0_g1_i1						7668_0:0014a4	1233632at2759	Reverse transcriptase
TRINITY_DN101628_c0_g1_i1						6573_0:0009e2	2657at6447	Synaptotagmin 21
TRINITY_DN101635_c0_g1_i1	sp|P62846|RS15_CHICK	P62846	GO:0003735; GO:0022627; GO:0003723; GO:0015935; GO:0005840; GO:0006412; GO:0000028	40S ribosomal protein S15 OS=Gallus gallus OX=9031 GN=RPS15 PE=2 SV=2		133434_0:0026ae	1390881at2759	40S ribosomal protein S15
TRINITY_DN10164_c0_g1_i6	sp|P21329|RTJK_DROFU	P21329	GO:0016779; GO:0006278; GO:0003964; GO:0016740	RNA-directed DNA polymerase from mobile element jockey OS=Drosophila funebris OX=7221 GN=jockey\pol PE=1 SV=1		70779_0:002548	1233632at2759	Reverse transcriptase
TRINITY_DN10164_c0_g2_i1						45351_0:0001f4	1233632at2759	Reverse transcriptase
TRINITY_DN10165_c0_g1_i9	sp|A4FUP9|GL1D1_MOUSE	A4FUP9	GO:0016757; GO:0008150; GO:0005576; GO:0016740; GO:0005829; GO:0003674	Glycosyltransferase 1 domain-containing protein 1 OS=Mus musculus OX=10090 GN=Glt1d1 PE=2 SV=2	PF13524.6; PF13692.6; PF00534.20	6526_0:005c1d	418678at33208	glycosyltransferase 1 domain-containing protein 1
TRINITY_DN101670_c0_g1_i1	sp|P05504|ATP6_RAT	P05504	GO:0007568; GO:0042776; GO:0005743; GO:0015078; GO:0005739; GO:0046933; GO:0045263; GO:0016021; GO:0015986; GO:0005575; GO:0055093; GO:0003674; GO:0016020; GO:0006754; GO:0006811; GO:0005753	ATP synthase subunit a OS=Rattus norvegicus OX=10116 GN=Mt-atp6 PE=1 SV=3		10116_0:005a4e	1095315at2759	ATP synthase subunit a
TRINITY_DN101679_c0_g1_i1	sp|P51644|ARF4_XENLA	P51644	GO:0000166; GO:0016192; GO:0015031; GO:0005515; GO:0005794; GO:0005525	ADP-ribosylation factor 4 OS=Xenopus laevis OX=8355 GN=arf4 PE=1 SV=2		8996_0:0024a1	12436at1549675	ADP-ribosylation factor 4
TRINITY_DN10169_c0_g1_i1	sp|Q28178|TSP1_BOVIN	Q28178	GO:0005615; GO:0006954; GO:0016525; GO:0062023; GO:0005509; GO:0005783; GO:0007155; GO:0034976; GO:0048266; GO:0050840; GO:0005576; GO:0008201; GO:0009986; GO:0031012; GO:0016529; GO:0006986	Thrombospondin-1 OS=Bos taurus OX=9913 GN=THBS1 PE=2 SV=2		7719_0:00166a	13143at2759	Thrombospondin type-1 (TSP1) repeat
TRINITY_DN101695_c0_g1_i1	sp|P86982|IMSP1_RUDPH	P86982	GO:0005576	Insoluble matrix shell protein 1 (Fragment) OS=Ruditapes philippinarum OX=129788 PE=1 SV=1		6565_0:00336e	14430at6447	uncharacterized protein LOC111130703
TRINITY_DN101708_c0_g1_i1						6412_0:005225	12280at1206795	28S ribosomal protein S17, mitochondrial-like
TRINITY_DN10171_c0_g1_i1					PF06705.11; PF04513.12
TRINITY_DN101729_c0_g1_i1	sp|P82198|BGH3_MOUSE	P82198	GO:0005178; GO:0062023; GO:0002062; GO:0007155; GO:0031012; GO:0050840; GO:0030198; GO:0005576; GO:0005802; GO:0005201; GO:0005604; GO:0001525; GO:0042802; GO:0005615; GO:0005518	Transforming growth factor-beta-induced protein ig-h3 OS=Mus musculus OX=10090 GN=Tgfbi PE=1 SV=1	PF02469.22	29159_0:0014f5	395206at33208	transforming growth factor-beta-induced protein ig-h3
TRINITY_DN101733_c0_g1_i1	sp|P82279|CRUM1_HUMAN	P82279	GO:0010467; GO:0001917; GO:0005509; GO:0042995; GO:0005902; GO:0007267; GO:0034613; GO:0005576; GO:0007157; GO:0016021; GO:0005886; GO:0005515; GO:0016020; GO:0010001; GO:0045197; GO:0007163; GO:0032991; GO:0007009	Protein crumbs homolog 1 OS=Homo sapiens OX=9606 GN=CRB1 PE=1 SV=2		7739_0:005a24	589046at2759	Glucoamylase
TRINITY_DN101739_c0_g1_i1	sp|Q6PDJ1|CAHD1_MOUSE	Q6PDJ1	GO:0008150; GO:0005245; GO:0006816; GO:0005891; GO:0016021; GO:0006811; GO:0016020; GO:0070588	VWFA and cache domain-containing protein 1 OS=Mus musculus OX=10090 GN=Cachd1 PE=2 SV=1	PF00092.28; PF08399.11; PF02743.18; PF13519.6	29159_0:00113f	137593at33208	VWFA and cache domain-containing protein 1
TRINITY_DN10174_c0_g1_i3					PF15347.6	29159_0:005716	10606at6447	uncharacterized protein LOC110465960
TRINITY_DN101745_c0_g1_i1	sp|Q29AK2|LMLN_DROPS	Q29AK2	GO:0006508; GO:0045842; GO:0005737; GO:0008354; GO:0046872; GO:0016020; GO:0008406; GO:0007100; GO:0016787; GO:0051298; GO:1902769; GO:0007155; GO:0007444; GO:0007076; GO:0007052; GO:0051301; GO:0004222; GO:0022900; GO:0019915; GO:0006338; GO:0007420; GO:0008233; GO:0007049	Leishmanolysin-like peptidase OS=Drosophila pseudoobscura pseudoobscura OX=46245 GN=GA17800 PE=3 SV=1	PF01457.16	6573_0:00189f	1310134at2759	surface protease GP63
TRINITY_DN101746_c0_g1_i1					PF08894.11	6565_0:0049f6	13323at6447	uncharacterized protein LOC111136818
TRINITY_DN101747_c0_g1_i1					PF13895.6; PF08205.12; PF07679.16; PF13927.6; PF00047.25	225164_0:001dbc	141865at33208	Immunoglobulin-like domain
TRINITY_DN101751_c0_g1_i1						6573_0:005b00	1300981at2759	Rho GTPase activation protein
TRINITY_DN101754_c0_g1_i1					PF03604.13; PF17064.5
TRINITY_DN101757_c0_g1_i1					PF12696.7	6565_0:007629	10844at1206795	putative nuclease HARBI1
TRINITY_DN10176_c0_g1_i2					PF00229.18
TRINITY_DN101766_c0_g1_i1	sp|Q9HC21|TPC_HUMAN	Q9HC21	GO:0055085; GO:0071934; GO:0030233; GO:0005743; GO:0030974; GO:0005739; GO:0042723; GO:0030302; GO:0016021; GO:0005634; GO:0016020; GO:0031305; GO:0015234	Mitochondrial thiamine pyrophosphate carrier OS=Homo sapiens OX=9606 GN=SLC25A19 PE=1 SV=1	PF00153.27; PF09149.10	6526_0:0042e5	1454699at2759	Mitochondrial carrier protein	R-HSA-196819	Vitamin B1 (thiamin) metabolism
TRINITY_DN101769_c0_g1_i1						29159_0:005cbd	172897at33208	L-dopachrome tautomerase
TRINITY_DN10177_c0_g1_i1	sp|Q13217|DNJC3_HUMAN	Q13217	GO:0005790; GO:0005788; GO:0005737; GO:1903912; GO:0051607; GO:0006986; GO:0044267; GO:0051787; GO:0070417; GO:0035578; GO:0005783; GO:0019901; GO:0051087; GO:0005576; GO:0043312; GO:0043687; GO:0051603; GO:0005829; GO:0004860; GO:0034976; GO:0036498; GO:0036494	DnaJ homolog subfamily C member 3 OS=Homo sapiens OX=9606 GN=DNAJC3 PE=1 SV=1	PF00697.22; PF09613.10; PF13424.6; PF04212.18; PF06160.12; PF03704.17; PF01239.22; PF13176.6; PF10938.8; PF07719.17; PF17874.1; PF00226.31; PF13174.6; PF14561.6; PF12895.7; PF13431.6; PF13428.6; PF10516.9; PF00515.28; PF13374.6; PF09295.10; PF13371.6; PF13181.6; PF07721.14; PF13414.6; PF13432.6; PF02064.15; PF09976.9; PF14863.6; PF18677.1; PF12862.7; PF14853.6; PF14559.6; PF12569.8	7574_0:002c4f	1106865at2759	dnaJ homolog subfamily C member 3	R-HSA-192823; R-HSA-381038; R-HSA-381426; R-HSA-6798695; R-HSA-8957275	Viral mRNA Translation; XBP1(S) activates chaperone genes; Regulation of Insulin-like Growth Factor (IGF) transport and uptake by Insulin-like Growth Factor Binding Proteins (IGFBPs); Neutrophil degranulation; Post-translational protein phosphorylation
TRINITY_DN10177_c1_g1_i3	sp|Q96HU8|DIRA2_HUMAN	Q96HU8	GO:0000166; GO:0043406; GO:0019003; GO:0007165; GO:0003924; GO:0005886; GO:0005515; GO:0016020; GO:0005525	GTP-binding protein Di-Ras2 OS=Homo sapiens OX=9606 GN=DIRAS2 PE=1 SV=1	PF13191.6; PF13401.6; PF03193.16; PF13479.6; PF08477.13; PF03308.16; PF01926.23; PF00071.22; PF13521.6; PF00025.21	10224_0:001962	1218505at2759	Small GTPase superfamily
TRINITY_DN101772_c0_g1_i1	sp|P03360|POL_AVIRE	P03360	GO:0075713; GO:0003677; GO:0016787; GO:0006508; GO:0003676; GO:0004523; GO:0015074; GO:0003723; GO:0004190; GO:0003887; GO:0003964; GO:0003824; GO:0046718; GO:0071897; GO:0090502; GO:0006278; GO:0006310; GO:0090305	Gag-Pol polyprotein (Fragment) OS=Avian reticuloendotheliosis virus OX=11636 GN=pol PE=1 SV=2	PF00665.26; PF17921.1; PF13976.6; PF09337.10	8090_0:000ba8	195413at33208	uncharacterized protein K02A2.6-like
TRINITY_DN101778_c0_g1_i1	sp|Q52RG8|FRS3_RAT	Q52RG8	GO:0008543; GO:0042802; GO:0016020; GO:0005104; GO:0005886	Fibroblast growth factor receptor substrate 3 OS=Rattus norvegicus OX=10116 GN=Frs3 PE=2 SV=3		6526_0:004dfe	10271at1206795	fibroblast growth factor receptor substrate 2-like isoform X1	R-RNO-5654693; R-RNO-5654700; R-RNO-5654706; R-RNO-5654712; R-RNO-5673001	FRS-mediated FGFR1 signaling; FRS-mediated FGFR2 signaling; FRS-mediated FGFR3 signaling; FRS-mediated FGFR4 signaling; RAF/MAP kinase cascade
TRINITY_DN10178_c0_g2_i2					PF14963.6; PF18604.1; PF16006.5	225164_0:000448	1259527at2759	uncharacterized protein LOC108685441
TRINITY_DN101780_c0_g1_i1						6565_0:0073be	2238at6447	uncharacterized protein LOC110466570
TRINITY_DN101781_c0_g1_i1					PF07332.11
TRINITY_DN101787_c0_g1_i1						6573_0:0042a8	1811at6447	uncharacterized protein LOC101854908
TRINITY_DN101789_c0_g1_i1	sp|Q14517|FAT1_HUMAN	Q14517	GO:0005911; GO:0098609; GO:0007015; GO:0005887; GO:0048471; GO:0007156; GO:0005509; GO:0007155; GO:0007267; GO:0016021; GO:0005886; GO:0005515; GO:0005634; GO:0009653; GO:0016477; GO:0016020; GO:0007163	Protocadherin Fat 1 OS=Homo sapiens OX=9606 GN=FAT1 PE=1 SV=2		7739_0:00015d	15091at33208	protocadherin-15
TRINITY_DN101791_c0_g1_i1	sp|B5DEQ3|XPP3_RAT	B5DEQ3	GO:0016787; GO:0008150; GO:0006508; GO:0042803; GO:0005737; GO:0004177; GO:0070006; GO:0008233; GO:0046872; GO:0005575; GO:0003674; GO:0003094; GO:0016485; GO:0005739; GO:0030145	Xaa-Pro aminopeptidase 3 OS=Rattus norvegicus OX=10116 GN=Xpnpep3 PE=1 SV=1	PF05195.16; PF00557.24	6500_0:00321c	200485at33208	xaa-Pro dipeptidase
TRINITY_DN101793_c0_g1_i1	sp|Q8NFZ3|NLGNY_HUMAN	Q8NFZ3	GO:0038023; GO:0042043; GO:0007268; GO:0005887; GO:0089717; GO:0045202; GO:0007158; GO:0007155; GO:0050839; GO:0035176; GO:0071625; GO:0097110; GO:0098983; GO:0005886; GO:0005515; GO:0007612; GO:0099054; GO:0098839; GO:0009986; GO:0098793; GO:0098985	Neuroligin-4, Y-linked OS=Homo sapiens OX=9606 GN=NLGN4Y PE=2 SV=1	PF07859.13; PF00135.28	6573_0:003796	2368at6447	acetylcholinesterase-like	R-HSA-6794361; R-HSA-6794361	Neurexins and neuroligins; Neurexins and neuroligins
TRINITY_DN101797_c0_g1_i1	sp|Q8R1C0|KCNC4_MOUSE	Q8R1C0	GO:0005886; GO:0099055; GO:0098978; GO:0005794; GO:0006813; GO:0030424; GO:0099056; GO:0043679; GO:0005783; GO:1904456; GO:0005249; GO:0008021; GO:1905030; GO:0030425; GO:0031594; GO:0043025; GO:0098690; GO:0044305; GO:0098794; GO:0006811; GO:0046928; GO:0009986; GO:1904057; GO:0005216; GO:0099508	Potassium voltage-gated channel subfamily C member 4 OS=Mus musculus OX=10090 GN=Kcnc4 PE=2 SV=1		6573_0:000f2c	331021at33208	potassium voltage-gated channel subfamily F member 1	R-MMU-1296072	Voltage gated Potassium channels
TRINITY_DN101798_c0_g1_i1						6573_0:00580f	133242at33208	Zinc finger, RING-type
TRINITY_DN1018_c0_g1_i2	sp|P04844|RPN2_HUMAN	P04844	GO:0007568; GO:0019082; GO:0005791; GO:0043022; GO:0008250; GO:0005783; GO:0042493; GO:0005789; GO:0006487; GO:0000421; GO:0016021; GO:0005515; GO:0004579; GO:0018279; GO:0006486; GO:0006464; GO:0016020; GO:0016604	Dolichyl-diphosphooligosaccharide--protein glycosyltransferase subunit 2 OS=Homo sapiens OX=9606 GN=RPN2 PE=1 SV=3	PF01835.19; PF01618.16; PF05817.14	6573_0:001bca	1001599at2759	dolichyl-diphosphooligosaccharide--protein glycosyltransferase subunit 2 isoform X1	R-HSA-1799339; R-HSA-446203	SRP-dependent cotranslational protein targeting to membrane; Asparagine N-linked glycosylation
TRINITY_DN101801_c0_g1_i1	sp|A8X6H1|EGL4_CAEBR	A8X6H1	GO:0000166; GO:0030553; GO:0106310; GO:0005524; GO:0004672; GO:0007275; GO:0004674; GO:0004692; GO:0006468; GO:0016740; GO:0005737; GO:0016310; GO:0106311; GO:0046872; GO:0005634; GO:0006935; GO:0016301	cGMP-dependent protein kinase egl-4 OS=Caenorhabditis briggsae OX=6238 GN=egl-4 PE=3 SV=2		6526_0:0000f2	1043at6447	cGMP-dependent protein kinase
TRINITY_DN101805_c0_g1_i1					PF01331.19; PF04934.14
TRINITY_DN101807_c0_g1_i1	sp|Q9NWL6|ASND1_HUMAN	Q9NWL6	GO:0008652; GO:0008150; GO:0004066; GO:0005575; GO:0003674; GO:0006541; GO:0006529	Asparagine synthetase domain-containing protein 1 OS=Homo sapiens OX=9606 GN=ASNSD1 PE=2 SV=2	PF06508.13; PF02540.17; PF00733.21; PF13537.6; PF13522.6	29159_0:002899	3635at6447	asparagine synthetase domain-containing protein 1-like
TRINITY_DN101809_c0_g1_i1	sp|Q1LWV4|LHX9_DANRE	Q1LWV4	GO:0003677; GO:0045892; GO:0006355; GO:0030182; GO:0097380; GO:0000981; GO:0046872; GO:0000977; GO:0005634; GO:0021794; GO:0048665; GO:0006357	LIM/homeobox protein Lhx9 OS=Danio rerio OX=7955 GN=lhx9 PE=2 SV=1	PF00046.29; PF05920.11; PF10545.9; PF11569.8	6526_0:0005c7	1174930at2759	LIM/homeobox protein Lhx9 isoform X1
TRINITY_DN10181_c0_g1_i9	sp|D3YXG0|HMCN1_MOUSE	D3YXG0	GO:0005938; GO:0007049; GO:0062023; GO:0007156; GO:0005509; GO:0005737; GO:0005576; GO:0007157; GO:0009617; GO:0005201; GO:0032154; GO:0051301; GO:0005604; GO:0030054; GO:0005912	Hemicentin-1 OS=Mus musculus OX=10090 GN=Hmcn1 PE=1 SV=1	PF00090.19; PF18721.1	48498_0:005f8d	11348at6101	coadhesin-like
TRINITY_DN101813_c0_g1_i1	sp|Q8N1F8|S11IP_HUMAN	Q8N1F8	GO:0005765; GO:0008104; GO:0035578; GO:0019901; GO:0005737; GO:0005576; GO:0043312	Serine/threonine-protein kinase 11-interacting protein OS=Homo sapiens OX=9606 GN=STK11IP PE=1 SV=4		6573_0:0021f2	1041637at2759	serine/threonine-protein kinase 11-interacting protein	R-HSA-6798695	Neutrophil degranulation
TRINITY_DN101815_c0_g1_i1	sp|P45974|UBP5_HUMAN	P45974	GO:0008270; GO:0006511; GO:0016579; GO:0008234; GO:0016787; GO:0006508; GO:0032436; GO:0004843; GO:0005764; GO:0004197; GO:0008233; GO:0046872; GO:0005634; GO:0005829; GO:0071108; GO:0043130; GO:0018215	Ubiquitin carboxyl-terminal hydrolase 5 OS=Homo sapiens OX=9606 GN=USP5 PE=1 SV=2		225164_0:0011f6	1088at6447	Ubiquitin carboxyl-terminal hydrolase	R-HSA-5689880; R-HSA-8866652	Ub-specific processing proteases; Synthesis of active ubiquitin: roles of E1 and E2 enzymes
TRINITY_DN101818_c0_g1_i1	sp|Q08A71|ANM6_ARATH	Q08A71	GO:0032259; GO:0016274; GO:0016740; GO:0018216; GO:0035246; GO:0008168	Probable protein arginine N-methyltransferase 6 OS=Arabidopsis thaliana OX=3702 GN=PRMT6 PE=2 SV=1	PF05185.16; PF08241.12; PF01135.19; PF08242.12; PF12847.7; PF08704.10; PF17286.2; PF08003.11; PF06325.13; PF05175.14; PF02475.16; PF13649.6; PF03602.15; PF13489.6; PF02353.20; PF13847.6; PF03848.14	29159_0:001671	387140at33208	protein arginine N-methyltransferase 6
TRINITY_DN101819_c0_g1_i1						6500_0:003f3f	1958at6447	uncharacterized protein LOC106876426
TRINITY_DN101821_c0_g1_i1					PF00001.21	6573_0:0054dc	421120at33208	probable G-protein coupled receptor 142
TRINITY_DN101822_c0_g1_i1	sp|Q8BGD5|CPT1C_MOUSE	Q8BGD5	GO:0032281; GO:0030424; GO:0016746; GO:0005741; GO:0005783; GO:0042995; GO:0045202; GO:0005789; GO:0016740; GO:0006629; GO:0004095; GO:0016021; GO:0030425; GO:0006631; GO:0009437; GO:0030054; GO:0005739; GO:0016020	Carnitine O-palmitoyltransferase 1, brain isoform OS=Mus musculus OX=10090 GN=Cpt1c PE=1 SV=1		7574_0:004ee3	228690at33208	carnitine O-palmitoyltransferase 1, liver isoform
TRINITY_DN101823_c0_g1_i1	sp|Q9BZF3|OSBL6_HUMAN	Q9BZF3	GO:0043231; GO:0008289; GO:0097038; GO:0006869; GO:0006699; GO:0005783; GO:0005737; GO:0005789; GO:0010008; GO:0015248; GO:0015485; GO:0005886; GO:0005515; GO:0005634; GO:0005829; GO:0005768; GO:0016020; GO:0005635; GO:0032934	Oxysterol-binding protein-related protein 6 OS=Homo sapiens OX=9606 GN=OSBPL6 PE=1 SV=1	PF00169.29; PF15409.6	225164_0:000fd7	1332at6447	Oxysterol-binding protein	R-HSA-192105	Synthesis of bile acids and bile salts
TRINITY_DN101824_c0_g1_i1	sp|Q9CR47|NSA2_MOUSE	Q9CR47	GO:0006364; GO:0042254; GO:0030687; GO:0000470; GO:0000460; GO:0005634; GO:0005730	Ribosome biogenesis protein NSA2 homolog OS=Mus musculus OX=10090 GN=Nsa2 PE=2 SV=1	PF01201.22	7574_0:000312	1079827at2759	Ribosome biogenesis protein NSA2
TRINITY_DN101826_c0_g1_i1						29159_0:000766	1233632at2759	Reverse transcriptase
TRINITY_DN10183_c0_g1_i2	sp|Q9GP32|ALF_ECHMU	Q9GP32	GO:0006096; GO:0004332; GO:0003824; GO:0016829	Fructose-bisphosphate aldolase OS=Echinococcus multilocularis OX=6211 GN=FBPA PE=2 SV=1	PF00274.19	29159_0:003194	342837at33208	Fructose-bisphosphate aldolase
TRINITY_DN101833_c0_g1_i1	sp|Q80T79|CSMD3_MOUSE	Q80T79	GO:0016021; GO:0005886; GO:0050773; GO:0003674; GO:0016020	CUB and sushi domain-containing protein 3 OS=Mus musculus OX=10090 GN=Csmd3 PE=1 SV=3	PF04731.12; PF02793.22; PF12662.7; PF00084.20	400682_0:002433	31246at33208	sushi, von Willebrand factor type A, EGF and pentraxin domain-containing protein 1
TRINITY_DN101835_c0_g1_i1	sp|P25067|CO8A2_HUMAN	P25067	GO:0098609; GO:0030674; GO:0005581; GO:0005788; GO:0007155; GO:0031012; GO:0030198; GO:0005576; GO:0005201; GO:0001525; GO:0005604; GO:0030199; GO:0005615	Collagen alpha-2(VIII) chain OS=Homo sapiens OX=9606 GN=COL8A2 PE=1 SV=2	PF00386.21; PF08702.10; PF18504.1; PF05938.11; PF04977.15; PF18573.1; PF16331.5; PF08317.11; PF16378.5; PF04102.12; PF14077.6	29159_0:005981	1320954at2759	complement C1q-like protein 3	R-HSA-1442490; R-HSA-1442490; R-HSA-1650814; R-HSA-2022090; R-HSA-216083; R-HSA-8948216	Collagen degradation; Collagen degradation; Collagen biosynthesis and modifying enzymes; Assembly of collagen fibrils and other multimeric structures; Integrin cell surface interactions; Collagen chain trimerization
TRINITY_DN101838_c0_g1_i1					PF01080.17
TRINITY_DN101843_c0_g1_i1	sp|P30875|SSR2_MOUSE	P30875	GO:0004994; GO:0042277; GO:0007186; GO:0005887; GO:0071392; GO:0043005; GO:0007165; GO:0005737; GO:0071385; GO:0004930; GO:0007218; GO:0016021; GO:0005886; GO:0007193; GO:0016020; GO:0042923	Somatostatin receptor type 2 OS=Mus musculus OX=10090 GN=Sstr2 PE=2 SV=1	PF12166.8; PF10320.9; PF00001.21; PF10328.9	6565_0:0050d5	1057232at2759	free fatty acid receptor 4	R-MMU-375276; R-MMU-418594	Peptide ligand-binding receptors; G alpha (i) signalling events
TRINITY_DN101847_c0_g1_i1	sp|Q8I7Z8|HAM_DROME	Q8I7Z8	GO:0046974; GO:0003677; GO:0006355; GO:0008285; GO:0000978; GO:0001228; GO:0048813; GO:0007219; GO:0007275; GO:0030154; GO:0014017; GO:0046872; GO:0005634; GO:0045944; GO:0006357; GO:0051567; GO:0050773; GO:0003700	Transcription factor hamlet OS=Drosophila melanogaster OX=7227 GN=ham PE=2 SV=1	PF09723.10; PF11672.8; PF00096.26; PF09237.11; PF18112.1; PF12171.8; PF12756.7; PF13909.6; PF01428.16; PF02892.15; PF13912.6; PF18868.1; PF12874.7; PF02748.15; PF08792.10; PF05605.12; PF13894.6; PF00130.22; PF17032.5; PF16622.5; PF13465.6	1155016_0:00645a			R-DME-8943724	Regulation of PTEN gene transcription
TRINITY_DN101853_c0_g1_i1	sp|Q96HP0|DOCK6_HUMAN	Q96HP0	GO:0007596; GO:0048471; GO:0007264; GO:0005737; GO:0005515; GO:0005829; GO:0005085; GO:0050790	Dedicator of cytokinesis protein 6 OS=Homo sapiens OX=9606 GN=DOCK6 PE=1 SV=3		225164_0:000cc1	136at1206795	Dedicator of cytokinesis	R-HSA-983231	Factors involved in megakaryocyte development and platelet production
TRINITY_DN10186_c0_g1_i8					PF05109.13
TRINITY_DN101864_c0_g1_i1	sp|A2VD92|DDX1_XENLA	A2VD92	GO:0016887; GO:0003712; GO:0006355; GO:0004386; GO:0006388; GO:0005737; GO:0006302; GO:0032508; GO:0006397; GO:0003724; GO:0005829; GO:0005634; GO:0004518; GO:0008143; GO:0005739; GO:0003682; GO:0072669; GO:0090305	ATP-dependent RNA helicase DDX1 OS=Xenopus laevis OX=8355 GN=ddx1 PE=2 SV=1	PF00622.28; PF13585.6; PF00270.29	29159_0:003bf7	1057at6447	ATP-dependent RNA helicase DDX1-like
TRINITY_DN101868_c0_g1_i1					PF11204.8; PF16038.5	29159_0:002304	3885at6447	uncharacterized protein LOC101849528
TRINITY_DN101872_c0_g1_i1	sp|V5NAL9|TLR4_PINIB	V5NAL9	GO:0061809; GO:0006955; GO:0016787; GO:0045087; GO:0007165; GO:0002376; GO:0016021; GO:0005886; GO:0004888; GO:0002224; GO:0016020; GO:0003953; GO:0050135	Toll-like receptor 4 OS=Pinctada imbricata OX=66713 PE=2 SV=1		6565_0:005ee9	13558at1206795	toll-like receptor 4
TRINITY_DN101881_c0_g1_i1					PF00686.19	7950_0:0038fd	169963at7742	starch-binding domain-containing protein 1
TRINITY_DN101886_c0_g1_i1	sp|Q14AM7|CP072_MOUSE	Q14AM7	GO:0008150; GO:0005575; GO:0003674	UPF0472 protein C16orf72 homolog OS=Mus musculus OX=10090 PE=2 SV=1	PF15251.6	6573_0:002471	1126238at2759	UPF0472 protein C16orf72 homolog
TRINITY_DN101888_c0_g1_i1	sp|Q9H1A4|APC1_HUMAN	Q9H1A4	GO:0007091; GO:0005680; GO:0070979; GO:0051301; GO:0031145; GO:0060090; GO:0005829; GO:0007049	Anaphase-promoting complex subunit 1 OS=Homo sapiens OX=9606 GN=ANAPC1 PE=1 SV=1	PF01851.22	6573_0:000f85	323458at33208	anaphase-promoting complex subunit 1	R-HSA-141430; R-HSA-174048; R-HSA-174084; R-HSA-174154; R-HSA-174178; R-HSA-174184; R-HSA-176407; R-HSA-176408; R-HSA-176409; R-HSA-176412; R-HSA-179409; R-HSA-2467813; R-HSA-2559582; R-HSA-69017; R-HSA-983168	Inactivation of APC/C via direct inhibition of the APC/C complex; APC/C:Cdc20 mediated degradation of Cyclin B; Autodegradation of Cdh1 by Cdh1:APC/C; APC/C:Cdc20 mediated degradation of Securin; APC/C:Cdh1 mediated degradation of Cdc20 and other APC/C:Cdh1 targeted proteins in late mitosis/early G1; Cdc20:Phospho-APC/C mediated degradation of Cyclin A; Conversion from APC/C:Cdc20 to APC/C:Cdh1 i…
TRINITY_DN101889_c0_g1_i1	sp|P54753|EPHB3_HUMAN	P54753	GO:0046777; GO:0048013; GO:0005887; GO:0043005; GO:0022407; GO:0005524; GO:0004672; GO:0042995; GO:0007275; GO:0033674; GO:0006468; GO:0016740; GO:0005005; GO:0034446; GO:0016021; GO:0004713; GO:0007411; GO:0007169; GO:0043235; GO:0004714; GO:0016301	Ephrin type-B receptor 3 OS=Homo sapiens OX=9606 GN=EPHB3 PE=1 SV=2	PF01404.19	6573_0:0037ed	397694at33208	Fibronectin type III	R-HSA-2682334; R-HSA-2682334; R-HSA-3928662; R-HSA-3928662; R-HSA-3928664; R-HSA-3928664; R-HSA-3928665	EPH-Ephrin signaling; EPH-Ephrin signaling; EPHB-mediated forward signaling; EPHB-mediated forward signaling; Ephrin signaling; Ephrin signaling; EPH-ephrin mediated repulsion of cells
TRINITY_DN10189_c0_g1_i12	sp|Q86YT6|MIB1_HUMAN	Q86YT6	GO:0008270; GO:0006511; GO:0006897; GO:0005856; GO:0004842; GO:0005737; GO:0007219; GO:0016567; GO:0016740; GO:0005813; GO:0005886; GO:0046872; GO:0005829; GO:0005515; GO:0014069; GO:0016020	E3 ubiquitin-protein ligase MIB1 OS=Homo sapiens OX=9606 GN=MIB1 PE=1 SV=1	PF00023.30; PF09026.10; PF06701.13; PF13637.6; PF13857.6; PF18346.1; PF12796.7; PF13606.6; PF00569.17; PF14447.6; PF13920.6	29159_0:0016cf	119594at33208	E3 ubiquitin-protein ligase MIB1	R-HSA-2122948; R-HSA-2644606; R-HSA-2691232; R-HSA-2894862; R-HSA-2979096; R-HSA-9013507	Activated NOTCH1 Transmits Signal to the Nucleus; Constitutive Signaling by NOTCH1 PEST Domain Mutants; Constitutive Signaling by NOTCH1 HD Domain Mutants; Constitutive Signaling by NOTCH1 HD+PEST Domain Mutants; NOTCH2 Activation and Transmission of Signal to the Nucleus; NOTCH3 Activation and Transmission of Signal to the Nucleus
TRINITY_DN101890_c0_g1_i1	sp|Q05707|COEA1_HUMAN	Q05707	GO:0005581; GO:0062023; GO:0005788; GO:0007155; GO:0005614; GO:0005576; GO:0030020; GO:0030199; GO:0005615	Collagen alpha-1(XIV) chain OS=Homo sapiens OX=9606 GN=COL14A1 PE=1 SV=3		6500_0:003d0c	1049829at2759	collagen alpha-6(VI) chain	R-HSA-1442490; R-HSA-1650814; R-HSA-2022090; R-HSA-8948216	Collagen degradation; Collagen biosynthesis and modifying enzymes; Assembly of collagen fibrils and other multimeric structures; Collagen chain trimerization
TRINITY_DN101896_c0_g1_i1						6565_0:00597e	13387at6447	uncharacterized protein LOC110444808
TRINITY_DN101897_c0_g1_i1					PF00057.18
TRINITY_DN101898_c0_g1_i1	sp|Q6PDI5|ECM29_MOUSE	Q6PDI5	GO:0005769; GO:0005768; GO:0005654; GO:0005770; GO:0005783; GO:0070628; GO:0005815; GO:0030139; GO:0005813; GO:0043248; GO:0005634; GO:0060090; GO:0030134; GO:0031410; GO:0005771; GO:0005793; GO:0030433	Proteasome adapter and scaffold protein ECM29 OS=Mus musculus OX=10090 GN=Ecpas PE=1 SV=3	PF13001.7; PF13646.6	6573_0:001acf	257at6447	proteasome-associated protein ECM29 homolog
TRINITY_DN10190_c0_g1_i2	sp|Q8BFR4|GNS_MOUSE	Q8BFR4	GO:0005539; GO:0016787; GO:0008484; GO:0043199; GO:0008449; GO:0005764; GO:0030203; GO:0046872; GO:0003824	N-acetylglucosamine-6-sulfatase OS=Mus musculus OX=10090 GN=Gns PE=1 SV=1	PF01663.22; PF16347.5; PF00884.23	29159_0:00229e	1273622at2759	Arylsulfatase	R-MMU-2022857; R-MMU-432720; R-MMU-6798695	Keratan sulfate degradation; Lysosome Vesicle Biogenesis; Neutrophil degranulation
TRINITY_DN101902_c0_g1_i1						400682_0:0008fb	31246at33208	sushi, von Willebrand factor type A, EGF and pentraxin domain-containing protein 1
TRINITY_DN101913_c0_g1_i1	sp|Q2VWP9|PRTG_RAT	Q2VWP9	GO:0038023; GO:0007155; GO:0007275; GO:0050768; GO:0016021; GO:0005886; GO:0007411; GO:0042802; GO:0016020	Protogenin OS=Rattus norvegicus OX=10116 GN=Prtg PE=2 SV=1		6573_0:004b40	1010015at2759	immunoglobulin superfamily DCC subclass member 3
TRINITY_DN101917_c0_g1_i1					PF15633.6	6573_0:004085	1888858at2759	uncharacterized protein LOC110462551
TRINITY_DN10192_c0_g1_i1	sp|Q3T0M9|ARL4A_BOVIN	Q3T0M9	GO:0000166; GO:0005654; GO:0016192; GO:0005737; GO:0006886; GO:0050873; GO:0005886; GO:0005634; GO:0005829; GO:0016020; GO:0005730; GO:0005525	ADP-ribosylation factor-like protein 4A OS=Bos taurus OX=9913 GN=ARL4A PE=2 SV=1	PF03029.17; PF08477.13; PF01926.23; PF00071.22; PF00009.27; PF04670.12; PF09439.10; PF00503.20; PF00025.21	6573_0:001caf	1457094at2759	ADP-ribosylation factor-like protein 4A
TRINITY_DN101920_c0_g1_i1					PF08570.10	6573_0:002b7e	10620at6447	uncharacterized protein LOC105325420
TRINITY_DN101928_c0_g1_i1	sp|Q60519|SEM5B_MOUSE	Q60519	GO:0030335; GO:0050919; GO:0045499; GO:0030215; GO:0071526; GO:0001755; GO:0048675; GO:0097485; GO:0007275; GO:0030154; GO:1990138; GO:0016021; GO:0007411; GO:0007399; GO:0016020; GO:0048843; GO:0050908	Semaphorin-5B OS=Mus musculus OX=10090 GN=Sema5b PE=2 SV=2	PF13385.6; PF00008.27; PF00090.19; PF07974.13; PF00354.17; PF12662.7; PF02210.24; PF12661.7	6565_0:005164	250683at33208	sushi repeat-containing protein SRPX2	R-MMU-5173214	O-glycosylation of TSR domain-containing proteins
TRINITY_DN101929_c0_g1_i1	sp|Q502G2|T41AA_DANRE	Q502G2	GO:0016020; GO:0003674; GO:0016021	Transmembrane protein 41A-A OS=Danio rerio OX=7955 GN=tmem41aa PE=2 SV=1	PF09335.11; PF04290.12; PF04610.14	29159_0:0056a7	1222755at2759	transmembrane protein 41B
TRINITY_DN10193_c0_g1_i10						29159_0:00057f	13639at6447	talin-2-like
TRINITY_DN101930_c0_g1_i1	sp|Q5S006|LRRK2_MOUSE	Q5S006	GO:0090263; GO:1904887; GO:0060159; GO:0051018; GO:1990909; GO:0060079; GO:1902803; GO:0043195; GO:0090394; GO:0030425; GO:1904713; GO:0010738; GO:0044877; GO:0030159; GO:0005515; GO:0060828; GO:0036465; GO:0051966; GO:0035641; GO:0034613; GO:0061001; GO:0035556; GO:0001933	Leucine-rich repeat serine/threonine-protein kinase 2 OS=Mus musculus OX=10090 GN=Lrrk2 PE=1 SV=2	PF16095.5	6573_0:00393e	10820at33208	leucine-rich repeat serine/threonine-protein kinase 1	R-MMU-8857538	PTK6 promotes HIF1A stabilization
TRINITY_DN101932_c0_g1_i1	sp|P32717|YJCS_ECOLI	P32717	GO:0046983; GO:0030288; GO:0018741; GO:0016787; GO:0018909	Putative alkyl/aryl-sulfatase YjcS OS=Escherichia coli (strain K12) OX=83333 GN=yjcS PE=1 SV=2	PF12706.7; PF14863.6; PF14864.6; PF00753.27; PF02036.17	6573_0:00345c	3088at6447	Alkyl/aryl-sulfatase BDS1
TRINITY_DN101935_c0_g1_i1						8128_0:00661a	120652at33208	Ribonuclease H superfamily
TRINITY_DN101939_c0_g1_i1						6565_0:003483	1339212at2759	paired box protein Pax-9
TRINITY_DN101941_c0_g1_i1						37653_0:0007d0	2271at6447	Polypeptide N-acetylgalactosaminyltransferase
TRINITY_DN101952_c0_g1_i1	sp|P31696|AGRIN_CHICK	P31696	GO:0045887; GO:0016021; GO:0005886; GO:0046872; GO:0016020; GO:0033691; GO:0030548; GO:0043547; GO:0043113; GO:0005509; GO:0008201; GO:0005576; GO:0030154; GO:0043395; GO:0045202; GO:0002162; GO:0035374; GO:0043236; GO:0045944; GO:0051491; GO:0030297; GO:0030054	Agrin OS=Gallus gallus OX=9031 GN=AGRN PE=1 SV=3	PF00050.21; PF07648.15	29159_0:0034a1	11050at6447	agrin-like
TRINITY_DN101958_c0_g1_i1	sp|B2GV47|RADX_RAT	B2GV47	GO:0005694; GO:0003677; GO:0003697; GO:0006282; GO:0005657; GO:2000042; GO:0016607	RPA-related protein RADX OS=Rattus norvegicus OX=10116 GN=Radx PE=2 SV=1	PF17659.1; PF15072.6; PF17244.2; PF17008.5	6573_0:000dbc	10216at6447	uncharacterized protein CXorf57 homolog
TRINITY_DN101961_c0_g1_i1						29159_0:0013ed	10149at1206795	uncharacterized protein LOC106052462
TRINITY_DN101963_c0_g1_i1	sp|Q9EQI6|IL17B_MESAU	Q9EQI6	GO:0005615; GO:0005125; GO:0007165; GO:0006954; GO:0005576	Interleukin-17B (Fragment) OS=Mesocricetus auratus OX=10036 GN=IL17B PE=2 SV=1		7668_0:000730	1298853at2759	interleukin-17D
TRINITY_DN101965_c0_g1_i1					PF07745.13; PF11790.8	225164_0:00020c	1257920at2759	glycoside hydrolase family 128 protein
TRINITY_DN101968_c0_g1_i1					PF16677.5
TRINITY_DN10197_c0_g3_i1						8128_0:002be7	151639at7898	uncharacterized protein LOC109101167
TRINITY_DN101972_c0_g1_i1	sp|Q32LN0|EHF_BOVIN	Q32LN0	GO:0006366; GO:0006355; GO:0003677; GO:0050673; GO:0030154; GO:0000981; GO:0030855; GO:0005634; GO:0043565; GO:0006357; GO:0003700	ETS homologous factor OS=Bos taurus OX=9913 GN=EHF PE=2 SV=1	PF00178.22; PF15465.6	52283_0:002662	360593at33208	Winged helix-like DNA-binding domain superfamily
TRINITY_DN101978_c0_g1_i1	sp|Q6PBA8|MNS1_DANRE	Q6PBA8	GO:0031514; GO:0051321; GO:0044782; GO:0005634; GO:0003674	Meiosis-specific nuclear structural protein 1 OS=Danio rerio OX=7955 GN=mns1 PE=2 SV=1		29159_0:00386f	449210at33208	meiosis-specific nuclear structural protein 1
TRINITY_DN10198_c0_g1_i3	sp|Q504E7|SZRD1_DANRE	Q504E7	GO:0008150; GO:0005575; GO:0003674	SUZ domain-containing protein 1 OS=Danio rerio OX=7955 GN=szrd1 PE=1 SV=1	PF12752.7; PF12901.7	6565_0:00414a	11705at6447	SUZ domain-containing protein 1-like
TRINITY_DN10199_c0_g1_i3	sp|Q6B9X6|VWKA_DICDI	Q6B9X6	GO:0000166; GO:0018209; GO:0106310; GO:0048471; GO:0005524; GO:0005737; GO:0004674; GO:0018107; GO:0006468; GO:0016740; GO:0106311; GO:0016310; GO:0000331; GO:0005773; GO:0006971; GO:0016020; GO:0005516; GO:0016301	Alpha-protein kinase vwkA OS=Dictyostelium discoideum OX=44689 GN=vwkA PE=1 SV=1	PF07622.11; PF02816.18	6573_0:004df5	1436038at2759	uncharacterized protein LOC106069103
TRINITY_DN101991_c0_g1_i1	sp|P22072|3BHS2_RAT	P22072	GO:0043231; GO:0006694; GO:0003854; GO:0005783; GO:0005737; GO:0016616; GO:0031966; GO:0008207; GO:0005789; GO:0016853; GO:0016021; GO:0004769; GO:0003824; GO:0016020; GO:0005739; GO:0008152; GO:0051412; GO:0021766; GO:0016491	3 beta-hydroxysteroid dehydrogenase/Delta 5-->4-isomerase type 2 OS=Rattus norvegicus OX=10116 GN=Hsd3b PE=2 SV=3	PF01370.21; PF01073.19; PF13460.6; PF07993.12; PF04321.17; PF16363.5	6573_0:002f78	390100at33208	short-chain dehydrogenase/reductase family 42E member 1
TRINITY_DN101992_c0_g1_i1					PF08920.10	123851_0:000fd9	245208at2759	splicing factor 3B subunit 1
TRINITY_DN101994_c0_g1_i1						6573_0:0059c2	1379695at2759	uncharacterized protein LOC105337582
TRINITY_DN101997_c0_g1_i1	sp|Q24563|DOPR2_DROME	Q24563	GO:0007186; GO:0071880; GO:0005887; GO:0001588; GO:0007165; GO:0030285; GO:0008226; GO:0004930; GO:0004935; GO:0016021; GO:0005886; GO:0016020; GO:0001963	Dopamine receptor 2 OS=Drosophila melanogaster OX=7227 GN=Dop1R2 PE=2 SV=1	PF09835.9; PF01529.20; PF10320.9; PF00001.21; PF12273.8	6573_0:00546a	1095345at2759	alpha-1D adrenergic receptor
TRINITY_DN102_c0_g1_i10	sp|Q8C838|TARG1_MOUSE	Q8C838	GO:0072659; GO:0099638; GO:0048471; GO:0099500; GO:0005737; GO:0030659; GO:0044381; GO:0016021; GO:0005886; GO:0005515; GO:0012505; GO:0032869; GO:0016020	Trafficking regulator of GLUT4 1 OS=Mus musculus OX=10090 GN=Trarg1 PE=1 SV=1	PF12704.7; PF13828.6; PF04505.12; PF10164.9; PF11014.8	225164_0:000f46	1501051at2759	proline-rich transmembrane protein 1-like
TRINITY_DN10201_c0_g1_i11	sp|Q14BI2|GRM2_MOUSE	Q14BI2	GO:0030424; GO:0007186; GO:0005246; GO:0005887; GO:0007216; GO:0051966; GO:0043005; GO:0042995; GO:0007165; GO:0042734; GO:0004930; GO:0001640; GO:0016021; GO:0005886; GO:0030054; GO:0016020; GO:0045202; GO:0014048; GO:0001641; GO:0014047	Metabotropic glutamate receptor 2 OS=Mus musculus OX=10090 GN=Grm2 PE=1 SV=2	PF00003.22; PF01094.28; PF01569.21	6573_0:005edb	2759at6447	uncharacterized protein LOC110444959	R-MMU-418594; R-MMU-420499	G alpha (i) signalling events; Class C/3 (Metabotropic glutamate/pheromone receptors)
TRINITY_DN102011_c0_g1_i1	sp|Q8K3K1|USH2A_RAT	Q8K3K1	GO:1990696; GO:0001917; GO:0032391; GO:0005886; GO:0005604; GO:0045184; GO:0016020; GO:0005576; GO:0043195; GO:0045202; GO:0007605; GO:0016477; GO:0043025; GO:0009887; GO:0050896; GO:0042995; GO:0007601; GO:1990075; GO:0034446; GO:0032420; GO:0009888; GO:0002142; GO:0002141	Usherin OS=Rattus norvegicus OX=10116 GN=Ush2a PE=1 SV=2	PF08329.10; PF16656.5; PF16893.5; PF00041.21	6573_0:000dbe	33at1206795	usherin-like
TRINITY_DN102013_c0_g1_i1						6565_0:002665	24127at33208	neurexin 3 isoform X1
TRINITY_DN102016_c0_g1_i1						34638_0:0029fc	1625053at2759	mitochondrial import receptor subunit TOM22 homolog
TRINITY_DN102021_c0_g1_i1					PF12235.8
TRINITY_DN102025_c0_g1_i1	sp|P98165|VLDLR_CHICK	P98165	GO:0006897; GO:0006869; GO:0008202; GO:0030228; GO:0005509; GO:0034361; GO:0006629; GO:0016021; GO:0034185; GO:0021517; GO:0030229; GO:0016020; GO:0008203; GO:0005905	Very low-density lipoprotein receptor OS=Gallus gallus OX=9031 GN=VLDLR PE=1 SV=1	PF00057.18	100784_0:003850	11206at9108	LOW QUALITY PROTEIN: low-density lipoprotein receptor-related protein 1-like
TRINITY_DN10203_c0_g1_i1	sp|G5EBQ8|CHS2_CAEEL	G5EBQ8	GO:0016757; GO:0071944; GO:0007275; GO:0061063; GO:0016758; GO:0016740; GO:0006031; GO:0016021; GO:0004100; GO:0005886; GO:0030428; GO:0016020	Chitin synthase chs-2 OS=Caenorhabditis elegans OX=6239 GN=chs-2 PE=1 SV=1	PF13506.6; PF00535.26; PF00536.30; PF14088.6; PF03009.17; PF11806.8; PF07647.17; PF03142.15; PF13641.6; PF13632.6	6573_0:004b44	124503at2759	Chitin synthase
TRINITY_DN102032_c0_g1_i1					PF17330.2
TRINITY_DN10204_c0_g2_i1	sp|Q24372|LACH_DROME	Q24372	GO:0016331; GO:0019991; GO:0043005; GO:0007156; GO:0042803; GO:0035151; GO:0007155; GO:0031225; GO:0007275; GO:0035160; GO:0005886; GO:0005515; GO:0061343; GO:0005918; GO:0016020; GO:0007424	Lachesin OS=Drosophila melanogaster OX=7227 GN=Lac PE=1 SV=2	PF00047.25; PF07686.17; PF16680.5; PF13895.6; PF17736.1; PF07679.16; PF16706.5; PF13927.6; PF16681.5	6565_0:00234d	265311at33208	igLON family member 5
TRINITY_DN102043_c0_g1_i1					PF13425.6; PF14316.6; PF13908.6; PF00876.18; PF15102.6; PF14163.6; PF15330.6; PF14575.6; PF09972.9; PF12911.7; PF05393.11; PF15179.6; PF15820.5; PF15176.6; PF00974.18; PF07204.11; PF16118.5; PF04277.13; PF06143.11; PF09911.9
TRINITY_DN102047_c0_g1_i1					PF07463.11; PF09668.10
TRINITY_DN10205_c0_g1_i5	sp|P97393|RHG05_MOUSE	P97393	GO:0005096; GO:0030335; GO:0043547; GO:0005783; GO:0007165; GO:0005737; GO:0042169; GO:0003924; GO:0002053; GO:0008361; GO:0005886; GO:0005829; GO:0030879; GO:0016020; GO:0005525	Rho GTPase-activating protein 5 OS=Mus musculus OX=10090 GN=Arhgap5 PE=1 SV=2	PF00620.27; PF08397.11	6500_0:001a5c	1024at6447	rho GTPase-activating protein 190-like isoform X1	R-MMU-194840	Rho GTPase cycle
TRINITY_DN102054_c0_g1_i1	sp|Q2KJ25|PSD12_BOVIN	Q2KJ25	GO:0008541; GO:0005737; GO:0022624; GO:0043161; GO:0000502; GO:0031595	26S proteasome non-ATPase regulatory subunit 12 OS=Bos taurus OX=9913 GN=PSMD12 PE=2 SV=3	PF02119.16; PF10602.9	6565_0:001850	246241at33208	26S proteasome non-ATPase regulatory subunit 12	R-BTA-174084; R-BTA-5689603; R-BTA-6798695; R-BTA-68827	Autodegradation of Cdh1 by Cdh1:APC/C; UCH proteinases; Neutrophil degranulation; CDT1 association with the CDC6:ORC:origin complex
TRINITY_DN102055_c0_g1_i1	sp|Q963B7|RL9_SPOFR	Q963B7	GO:0003735; GO:0005840; GO:0019843; GO:0006412	60S ribosomal protein L9 OS=Spodoptera frugiperda OX=7108 GN=RpL9 PE=2 SV=1	PF00347.23	6412_0:0033ac	1408258at2759	Ribosomal protein L6, alpha-beta domain
TRINITY_DN102057_c0_g1_i1						6573_0:004fef
TRINITY_DN10206_c0_g1_i12	sp|Q6AZB8|HARB1_DANRE	Q6AZB8	GO:0016787; GO:0005737; GO:0046872; GO:0004518; GO:0005634; GO:0090305	Putative nuclease HARBI1 OS=Danio rerio OX=7955 GN=harbi1 PE=2 SV=1	PF04545.16; PF13613.6; PF01609.21; PF13359.6; PF04827.14	6565_0:006eb6	19314at6447	putative nuclease HARBI1
TRINITY_DN102067_c0_g1_i1	sp|Q9M630|HBL0_PHYPA	Q9M630	GO:0019825; GO:0005344; GO:0046872; GO:0015671; GO:0020037	Non-symbiotic hemoglobin 0 OS=Physcomitrella patens subsp. patens OX=3218 GN=GLB0 PE=2 SV=1		6573_0:002903	10256at1206795	Cytoglobin-2
TRINITY_DN10207_c0_g1_i1	sp|Q6GQN4|FA32A_DANRE	Q6GQN4	GO:0005730; GO:0003674; GO:0006915; GO:0005634; GO:0007049	Protein FAM32A-like OS=Danio rerio OX=7955 GN=fam32al PE=3 SV=1	PF14362.6; PF11658.8; PF17031.5; PF08555.10; PF09531.10; PF04108.12; PF03665.13	7574_0:001adc	1603617at2759	protein FAM32A
TRINITY_DN102077_c0_g1_i1	sp|Q6UVM4|KCNT2_RAT	Q6UVM4	GO:0015271; GO:0005524; GO:0070089; GO:0097623; GO:0016021; GO:0005886; GO:0006813; GO:0016020; GO:0005267; GO:0005228	Potassium channel subfamily T member 2 OS=Rattus norvegicus OX=10116 GN=Kcnt2 PE=1 SV=1	PF00055.17	6573_0:002c4f	143826at33208	potassium channel subfamily T member 2 isoform X1
TRINITY_DN10208_c0_g1_i3						29159_0:005059	104746at2759	SH3 domain
TRINITY_DN102084_c0_g1_i1						6565_0:002e48	13310at6447	uncharacterized protein LOC105318540
TRINITY_DN102096_c0_g1_i1	sp|P0CB38|PAB4L_HUMAN	P0CB38	GO:0003730; GO:1990904; GO:0008266; GO:0003676; GO:0003723; GO:0005634; GO:0005829; GO:0008143; GO:0010494	Polyadenylate-binding protein 4-like OS=Homo sapiens OX=9606 GN=PABPC4L PE=2 SV=1		13164_0:00066a	107591at50557	heterogeneous nuclear ribonucleoprotein 87F-like isoform X1
TRINITY_DN1021_c0_g1_i3	sp|A2AX52|CO6A4_MOUSE	A2AX52	GO:0005581; GO:0062023; GO:0007155; GO:0031012; GO:0030198; GO:0005576; GO:0030020; GO:0032991; GO:0005518	Collagen alpha-4(VI) chain OS=Mus musculus OX=10090 GN=Col6a4 PE=1 SV=2	PF05762.14; PF13768.6; PF06858.14; PF03927.13; PF13519.6; PF16921.5; PF04811.15; PF00092.28	6573_0:004b97	1049829at2759	collagen alpha-6(VI) chain
TRINITY_DN10210_c0_g1_i1					PF13405.6; PF13202.6; PF13499.6; PF00036.32
TRINITY_DN102104_c0_g1_i1	sp|B3H6K1|Y4791_ARATH	B3H6K1	GO:0072659; GO:0016746; GO:0016021; GO:0032216; GO:0016020; GO:0006506	Uncharacterized protein At4g17910 OS=Arabidopsis thaliana OX=3702 GN=At4g17910 PE=2 SV=2		37653_0:002651	1202772at2759	phosphatidylinositol-glycan biosynthesis class W protein
TRINITY_DN102109_c0_g1_i1	sp|Q92618|ZN516_HUMAN	Q92618	GO:0003677; GO:0009409; GO:0006355; GO:0000978; GO:0120162; GO:0050873; GO:0000981; GO:0000987; GO:0046872; GO:0005634; GO:0060612; GO:0006357; GO:0033613; GO:0045893	Zinc finger protein 516 OS=Homo sapiens OX=9606 GN=ZNF516 PE=1 SV=1		7918_0:002829	13072at7898	Zinc finger protein 516
TRINITY_DN102112_c0_g1_i1					PF00754.25; PF00059.21	8364_0:002b30	166321at7742	fucolectin-like
TRINITY_DN102113_c0_g1_i1					PF15102.6; PF09772.9	6573_0:000c14	1097257at2759	transmembrane protein 26
TRINITY_DN102120_c0_g1_i1					PF05141.12	29159_0:004e05	1173544at2759	DnaJ domain
TRINITY_DN102123_c0_g1_i1	sp|Q64487|PTPRD_MOUSE	Q64487	GO:0016787; GO:0004725; GO:0016311; GO:0004721; GO:0046426; GO:0007157; GO:0050775; GO:0035335; GO:0005515; GO:0099560; GO:0097105; GO:0051965; GO:0016791; GO:0016021; GO:0016020; GO:0006470; GO:0050776	Receptor-type tyrosine-protein phosphatase delta OS=Mus musculus OX=10090 GN=Ptprd PE=1 SV=3	PF16656.5; PF00041.21	6573_0:000ce7	1010015at2759	immunoglobulin superfamily DCC subclass member 3	R-MMU-388844; R-MMU-8849932	Receptor-type tyrosine-protein phosphatases; Synaptic adhesion-like molecules
TRINITY_DN102125_c0_g1_i1						6573_0:0034e3	535076at33208	uncharacterized protein LOC110458901
TRINITY_DN102126_c0_g1_i1	sp|Q28IM6|HPCL1_XENTR	Q28IM6	GO:0005509; GO:0046872	Hippocalcin-like protein 1 OS=Xenopus tropicalis OX=8364 GN=hpcal1 PE=2 SV=1	PF12763.7; PF13405.6; PF13499.6; PF13202.6; PF10591.9; PF13833.6; PF00036.32	6565_0:001a24	1271942at2759	EF-hand domain
TRINITY_DN10213_c0_g1_i1					PF00377.18; PF08945.10
TRINITY_DN102131_c0_g1_i1	sp|Q8HWS3|RFX6_HUMAN	Q8HWS3	GO:0005515	DNA-binding protein RFX6 OS=Homo sapiens OX=9606 GN=RFX6 PE=1 SV=2		6573_0:0058c7	1183at6447	Winged helix-like DNA-binding domain superfamily	R-HSA-210745	Regulation of gene expression in beta cells
TRINITY_DN102134_c0_g1_i1	sp|Q7KRY7|LAP4_DROME	Q7KRY7	GO:0098609; GO:0016323; GO:0007608; GO:0005737; GO:0045571; GO:0005886; GO:0098887; GO:0007399; GO:0016020; GO:0008328; GO:0005938; GO:0005923; GO:0043113; GO:0030154; GO:0014069; GO:0045197; GO:0005912; GO:0050896; GO:0097120; GO:0007275; GO:0098968; GO:0045211; GO:0030054; GO:1990794	Protein lap4 OS=Drosophila melanogaster OX=7227 GN=scrib PE=1 SV=1	PF18084.1; PF00560.33; PF14580.6; PF13855.6; PF13306.6; PF12799.7	6565_0:0003a0	148064at33208	leucine-rich repeat-containing protein 1	R-DME-438066; R-DME-6798695	Unblocking of NMDA receptors, glutamate binding and activation; Neutrophil degranulation
TRINITY_DN102137_c0_g1_i1	sp|A8WQK3|ACH1_CAEBR	A8WQK3	GO:0060079; GO:0050877; GO:0005887; GO:0007268; GO:0034220; GO:0045211; GO:0043005; GO:0005230; GO:0042995; GO:0030594; GO:0007165; GO:0042391; GO:0060078; GO:0022848; GO:0005886; GO:0045202; GO:0006811; GO:0016020	Acetylcholine receptor subunit alpha-type acr-16 OS=Caenorhabditis briggsae OX=6238 GN=acr-16 PE=3 SV=2	PF02931.23	29159_0:003235	132859at2759	Thrombospondin type-1 (TSP1) repeat
TRINITY_DN102138_c0_g1_i1						6573_0:004b01	17187at6447	Uncharacterized protein C3orf59
TRINITY_DN10214_c0_g1_i2	sp|A1L3F4|MEX3B_XENLA	A1L3F4	GO:0003676; GO:0000932; GO:0005737; GO:0003723; GO:0046872; GO:0005634	RNA-binding protein MEX3B OS=Xenopus laevis OX=8355 GN=mex3b PE=2 SV=1	PF00097.25; PF13445.6; PF07650.17; PF13639.6; PF00013.29; PF12678.7; PF13083.6; PF07191.12; PF14634.6; PF14447.6; PF13920.6; PF14570.6; PF15227.6	6573_0:003337	351875at33208	RNA-binding protein MEX3B
TRINITY_DN102140_c0_g1_i1	sp|Q9CZJ2|HS12B_MOUSE	Q9CZJ2	GO:0008150; GO:0005524; GO:0005575; GO:0000166; GO:0003674	Heat shock 70 kDa protein 12B OS=Mus musculus OX=10090 GN=Hspa12b PE=1 SV=1		6565_0:00645e	804087at2759	actin-like ATPase domain-containing protein	R-MMU-3371453	Regulation of HSF1-mediated heat shock response
TRINITY_DN102148_c0_g1_i1					PF08702.10; PF16888.5; PF05384.11; PF05791.11; PF14523.6; PF06009.12; PF07889.12; PF04728.13
TRINITY_DN102150_c0_g1_i1					PF17225.3; PF04434.17	225164_0:000a10	148879at2759	adhesion G-protein coupled receptor G4
TRINITY_DN10216_c0_g1_i4	sp|O18973|RABX5_BOVIN	O18973	GO:0055037; GO:0005769; GO:0008270; GO:0006897; GO:0003677; GO:0005737; GO:0015031; GO:0005515; GO:0046872; GO:0005768	Rab5 GDP/GTP exchange factor OS=Bos taurus OX=9913 GN=RABGEF1 PE=1 SV=1	PF06398.11	6573_0:000639	320193at33208	rab5 GDP/GTP exchange factor isoform X1
TRINITY_DN10216_c0_g2_i5						29159_0:0042ae	1056047at2759	uncharacterized protein LOC108709187
TRINITY_DN102160_c0_g1_i1	sp|D4ACN8|PLRKT_RAT	D4ACN8	GO:0005887; GO:0006954; GO:0010756; GO:0016021; GO:0005886; GO:0016020; GO:0006935	Plasminogen receptor (KT) OS=Rattus norvegicus OX=10116 GN=Plgrkt PE=1 SV=1		6565_0:0012ce	10663at6447	plasminogen receptor (KT)-like
TRINITY_DN102161_c0_g1_i1						7962_0:002cb0
TRINITY_DN102162_c0_g1_i1	sp|Q8BNA6|FAT3_MOUSE	Q8BNA6	GO:0000904; GO:0098609; GO:2000171; GO:0007156; GO:0005509; GO:0010842; GO:0007155; GO:0001764; GO:0007275; GO:0016021; GO:0005886; GO:0030425; GO:0016020	Protocadherin Fat 3 OS=Mus musculus OX=10090 GN=Fat3 PE=1 SV=2		42514_0:005421	12779at2759	protocadherin Fat 2
TRINITY_DN102164_c0_g1_i1					PF05461.11; PF11348.8; PF09472.10
TRINITY_DN102172_c0_g1_i1						29159_0:00281b	1435at6447	uncharacterized protein LOC111122400
TRINITY_DN102175_c0_g1_i1	sp|Q16581|C3AR_HUMAN	Q16581	GO:0007186; GO:0006954; GO:0002430; GO:0007165; GO:0004876; GO:0004930; GO:0016021; GO:0005886; GO:0004875; GO:0016020; GO:0007204; GO:0006935; GO:0007200	C3a anaphylatoxin chemotactic receptor OS=Homo sapiens OX=9606 GN=C3AR1 PE=1 SV=2	PF13853.6; PF00001.21; PF11710.8	29159_0:000d55	1350952at2759	uncharacterized protein LOC105326586	R-HSA-375276; R-HSA-418594; R-HSA-6798695; R-HSA-977606	Peptide ligand-binding receptors; G alpha (i) signalling events; Neutrophil degranulation; Regulation of Complement cascade
TRINITY_DN102182_c0_g1_i1	sp|P58108|AAKG1_BOVIN	P58108	GO:0042149; GO:0000166; GO:0016208; GO:0005524; GO:0006633; GO:0005737; GO:0019901; GO:0031588; GO:0006468; GO:0032559; GO:0019887; GO:0006629; GO:0043531; GO:0071900; GO:0005634; GO:0006631; GO:0050790	5'-AMP-activated protein kinase subunit gamma-1 OS=Bos taurus OX=9913 GN=PRKAG1 PE=2 SV=2		6573_0:0039cc	1373724at2759	CBS domain
TRINITY_DN102184_c0_g1_i1	sp|Q05084|ICA69_HUMAN	Q05084	GO:0043231; GO:0030667; GO:0140090; GO:0030658; GO:0051049; GO:0005515; GO:0005794; GO:0005829; GO:0030672; GO:0019904; GO:0000139	Islet cell autoantigen 1 OS=Homo sapiens OX=9606 GN=ICA1 PE=1 SV=2		225164_0:000eea	3305at6447	islet cell autoantigen 1-like isoform X1
TRINITY_DN10219_c1_g1_i2	sp|Q5ZM25|OLA1_CHICK	Q5ZM25	GO:0016887; GO:0000166; GO:0043022; GO:0016787; GO:0005524; GO:0005737; GO:0043023; GO:0046872; GO:0005634; GO:0005730; GO:0005525	Obg-like ATPase 1 OS=Gallus gallus OX=9031 GN=OLA1 PE=2 SV=1	PF02824.21; PF08477.13; PF01926.23; PF03308.16; PF00350.23; PF02421.18; PF06071.13	29159_0:0027a6	3375at6447	obg-like ATPase 1	R-GGA-114608	Platelet degranulation
TRINITY_DN102191_c0_g1_i1	sp|Q9VT65|CANB_DROME	Q9VT65	GO:0008234; GO:0016787; GO:0016540; GO:0016322; GO:0007298; GO:0005509; GO:0005737; GO:0006508; GO:0008233; GO:0005515; GO:0046872; GO:0004198; GO:0016020	Calpain-B OS=Drosophila melanogaster OX=7227 GN=CalpB PE=1 SV=2		6573_0:0057fd	2438at6447	calpain-2 catalytic subunit-like isoform X1	R-DME-6798695	Neutrophil degranulation
TRINITY_DN10220_c0_g1_i2					PF07240.11
TRINITY_DN102204_c0_g1_i1					PF03839.16; PF14362.6; PF04889.12; PF14282.6; PF04801.13; PF15917.5
TRINITY_DN10221_c0_g1_i8	sp|Q5ZKU0|PKRI1_CHICK	Q5ZKU0	GO:0005681; GO:0008380; GO:0004860; GO:0042326; GO:0003725; GO:0019901; GO:0006469; GO:0006397; GO:0005634; GO:0003014; GO:0005730	PRKR-interacting protein 1 homolog OS=Gallus gallus OX=9031 GN=PRKRIP1 PE=2 SV=1	PF06658.12; PF14661.6	6573_0:004241	11009at6447	PRKR-interacting protein 1 homolog
TRINITY_DN10221_c1_g1_i4	sp|A5HK05|APBP2_RAT	A5HK05	GO:0005856; GO:0005874; GO:0005654; GO:0005737; GO:0030659; GO:0006886; GO:0015031; GO:0046907; GO:0005634; GO:0016020	Amyloid protein-binding protein 2 OS=Rattus norvegicus OX=10116 GN=Appbp2 PE=2 SV=1	PF00619.21; PF16739.5	6573_0:005629	1923at6447	amyloid protein-binding protein 2-like
TRINITY_DN102210_c0_g1_i2	sp|Q8VE96|S35F6_MOUSE	Q8VE96	GO:0055085; GO:0043231; GO:0005765; GO:0005654; GO:0005739; GO:0005764; GO:0016021; GO:1901029; GO:0005829; GO:0003674; GO:0022857; GO:0008284; GO:0016020	Solute carrier family 35 member F6 OS=Mus musculus OX=10090 GN=Slc35f6 PE=1 SV=1		29159_0:0013c6	1169953at2759	solute carrier family 35 member F6
TRINITY_DN102215_c0_g1_i1						6573_0:004a80	1433065at2759	uncharacterized protein LOC105318845
TRINITY_DN102219_c0_g1_i1	sp|O43854|EDIL3_HUMAN	O43854	GO:0005178; GO:0062023; GO:0005509; GO:0007275; GO:0007155; GO:1903561; GO:0005576; GO:0005201; GO:0070062; GO:0046872; GO:0010811	EGF-like repeat and discoidin I-like domain-containing protein 3 OS=Homo sapiens OX=9606 GN=EDIL3 PE=1 SV=1	PF01607.24; PF00059.21; PF00754.25; PF06588.11	29159_0:0031f1	21089at1206795	lactadherin-like
TRINITY_DN10222_c0_g1_i6	sp|Q8BJQ4|TCAM2_MOUSE	Q8BJQ4	GO:0005769; GO:0045323; GO:0001817; GO:0071222; GO:0034144; GO:0071650; GO:0005737; GO:0051607; GO:0006909; GO:0005886; GO:0043122; GO:0016020; GO:0046982; GO:0034145; GO:0005770; GO:0005783; GO:0071651; GO:0035669; GO:0005515; GO:2000494; GO:0032648; GO:0005149; GO:0006954; GO:0001891	TIR domain-containing adapter molecule 2 OS=Mus musculus OX=10090 GN=Ticam2 PE=1 SV=1	PF13676.6; PF16634.5; PF12721.7	6565_0:003453	11539at6447	uncharacterized protein LOC111129141	R-MMU-140534; R-MMU-166016; R-MMU-166166; R-MMU-2562578; R-MMU-6798695; R-MMU-936964; R-MMU-937041; R-MMU-937072; R-MMU-975163	Caspase activation via Death Receptors in the presence of ligand; Toll Like Receptor 4 (TLR4) Cascade; MyD88-independent TLR4 cascade ; TRIF-mediated programmed cell death; Neutrophil degranulation; Activation of IRF3/IRF7 mediated by TBK1/IKK epsilon; IKK complex recruitment mediated by RIP1; TRAF6-mediated induction of TAK1 complex within TLR4 complex; IRAK2 mediated activation of TAK1 complex …
TRINITY_DN102226_c0_g1_i1					PF17146.4
TRINITY_DN102231_c0_g1_i1						225164_0:0003de	10868at1206795	uncharacterized protein LOC101856414
TRINITY_DN10224_c0_g1_i1	sp|Q9V998|UBL5_DROME	Q9V998	GO:0005737; GO:0031386; GO:0005634; GO:0000398; GO:0003674; GO:0006464	Ubiquitin-like protein 5 OS=Drosophila melanogaster OX=7227 GN=ubl PE=3 SV=1		6412_0:001f51	12283at1206795	V4BB47_LOTGI
TRINITY_DN102243_c0_g1_i1	sp|Q9U9K0|ADD1_CAEEL	Q9U9K0	GO:0051016; GO:0003779; GO:0005856; GO:0051015; GO:2000249; GO:0097120; GO:0005737; GO:0005886; GO:0007614; GO:0007616; GO:0007613; GO:0014069; GO:0016020	Adducin-related protein 1 OS=Caenorhabditis elegans OX=6239 GN=add-1 PE=2 SV=2		6573_0:004479	1543at6447	Nervous system adducin	R-CEL-5223345	Miscellaneous transport and binding events
TRINITY_DN102248_c0_g1_i1					PF00643.24; PF09947.9; PF13842.6
TRINITY_DN102252_c0_g1_i1					PF13561.6
TRINITY_DN102255_c0_g1_i1	sp|Q6IR41|C1QT6_MOUSE	Q6IR41	GO:0005581; GO:0005576; GO:0005515; GO:0042802; GO:0005615; GO:0032991	Complement C1q tumor necrosis factor-related protein 6 OS=Mus musculus OX=10090 GN=C1qtnf6 PE=2 SV=1	PF12825.7; PF17841.1; PF02015.16; PF00386.21	6573_0:005627	1258047at2759	otolin-1
TRINITY_DN10226_c0_g1_i2	sp|Q3ULD5|MCCB_MOUSE	Q3ULD5	GO:0006552; GO:0000166; GO:0015936; GO:0005524; GO:0016874; GO:0005759; GO:1905202; GO:0004485; GO:0005739	Methylcrotonoyl-CoA carboxylase beta chain, mitochondrial OS=Mus musculus OX=10090 GN=Mccc2 PE=1 SV=1	PF01039.22; PF06833.11	6573_0:002954	1576at6447	methylcrotonoyl-CoA carboxylase beta chain, mitochondrial-like	R-MMU-196780; R-MMU-70895	Biotin transport and metabolism; Branched-chain amino acid catabolism
TRINITY_DN102274_c0_g1_i1	sp|Q91048|PTK7_CHICK	Q91048	GO:0005911; GO:0005524; GO:0004672; GO:0007155; GO:0050839; GO:0006468; GO:0016055; GO:0016021; GO:0005886; GO:0004713; GO:0060828; GO:0016020; GO:0018108	Inactive tyrosine-protein kinase 7 OS=Gallus gallus OX=9031 GN=PTK7 PE=2 SV=1		37653_0:003156	245153at33208	inactive tyrosine-protein kinase 7
TRINITY_DN10229_c0_g1_i2					PF06688.11; PF16482.5; PF04341.12
TRINITY_DN10229_c0_g2_i1						6573_0:004b5a	878914at2759	Zinc finger, RING-type
TRINITY_DN102298_c0_g1_i1	sp|Q1JPH6|IF4H_BOVIN	Q1JPH6	GO:0006413; GO:0048471; GO:0003676; GO:0006412; GO:0034057; GO:0005737; GO:0003723; GO:0043024; GO:0001731; GO:0097010; GO:0033592; GO:0003743	Eukaryotic translation initiation factor 4H OS=Bos taurus OX=9913 GN=EIF4H PE=2 SV=1	PF00076.22	29159_0:001123	10646at6447	eukaryotic translation initiation factor 4H-like
TRINITY_DN1023_c0_g1_i9	sp|Q07813|BAX_MOUSE	Q07813	GO:0008637; GO:0008635; GO:0005783; GO:0031966; GO:0051881; GO:0043065; GO:0001836; GO:0043524; GO:0005829; GO:0071310; GO:0008625	Apoptosis regulator BAX OS=Mus musculus OX=10090 GN=Bax PE=1 SV=1	PF15185.6; PF00452.19	6573_0:003ec7	1218929at2759	apoptosis regulator Bcl-2	R-MMU-111457; R-MMU-114294; R-MMU-6804114	Release of apoptotic factors from the mitochondria; Activation, translocation and oligomerization of BAX; TP53 Regulates Transcription of Genes Involved in G2 Cell Cycle Arrest
TRINITY_DN102304_c0_g1_i1	sp|Q9HDC9|APMAP_HUMAN	Q9HDC9	GO:0016844; GO:0008150; GO:0009986; GO:0016021; GO:0005515; GO:0004064; GO:0009058; GO:0016020	Adipocyte plasma membrane-associated protein OS=Homo sapiens OX=9606 GN=APMAP PE=1 SV=2		6500_0:0041bc	336287at33208	adipocyte plasma membrane-associated protein
TRINITY_DN102306_c0_g1_i1						7574_0:0051b1	10575at1206795	short-chain collagen C4-like
TRINITY_DN10231_c0_g1_i4	sp|H3ZPL1|ARAT1_THELN	H3ZPL1	GO:0008793; GO:0008483; GO:0016740; GO:0003824; GO:0080130; GO:0009058; GO:0030170	Aromatic-amino-acid aminotransferase 1 OS=Thermococcus litoralis (strain ATCC 51850 / DSM 5473 / JCM 8560 / NS-C) OX=523849 GN=OCC_04335 PE=1 SV=1	PF12897.7; PF00155.21; PF01212.21	6573_0:001a05	1156861at2759	Pyridoxal phosphate-dependent transferase
TRINITY_DN102312_c0_g1_i1	sp|Q00963|SPTCB_DROME	Q00963	GO:0005737; GO:0048790; GO:0005886; GO:0007399; GO:0030424; GO:0005938; GO:0030506; GO:0007409; GO:0045170; GO:0045169; GO:0031594; GO:0016328; GO:0005856; GO:0050807; GO:0007411; GO:0007274; GO:0042062; GO:0007026; GO:0016199; GO:0005546; GO:0008017; GO:0072499	Spectrin beta chain OS=Drosophila melanogaster OX=7227 GN=beta-Spec PE=1 SV=2		6565_0:003554	100at1206795	Spectrin beta chain	R-DME-6807878	COPI-mediated anterograde transport
TRINITY_DN102318_c0_g1_i1	sp|Q9VUJ0|RM39_DROME	Q9VUJ0	GO:0005762; GO:0000166; GO:0003735; GO:0031047; GO:0032543; GO:0006417; GO:0005739; GO:0005840	39S ribosomal protein L39, mitochondrial OS=Drosophila melanogaster OX=7227 GN=mRpL39 PE=2 SV=2		37653_0:0010be	1202682at2759	39S ribosomal protein L39, mitochondrial	R-DME-5389840; R-DME-5419276	Mitochondrial translation elongation; Mitochondrial translation termination
TRINITY_DN102322_c0_g1_i1	sp|Q9H5P4|PDZD7_HUMAN	Q9H5P4	GO:0050910; GO:0001917; GO:0032420; GO:0032426; GO:0042995; GO:0032391; GO:0060117; GO:0060088; GO:0005886; GO:0002142; GO:0005634; GO:0005515; GO:0005929; GO:0045184; GO:0007605; GO:0002141	PDZ domain-containing protein 7 OS=Homo sapiens OX=9606 GN=PDZD7 PE=1 SV=2		6573_0:0029f2	168224at2759	PDZ domain-containing protein 7
TRINITY_DN102325_c0_g1_i1					PF16640.5; PF01667.17
TRINITY_DN102336_c0_g1_i1						29159_0:0039a5	1135476at2759	Predicted protein
TRINITY_DN102337_c0_g1_i1						6526_0:004d0f	1645at6447	ARID DNA-binding domain
TRINITY_DN10234_c0_g1_i1	sp|E9Q5F9|SETD2_MOUSE	E9Q5F9	GO:0034340; GO:0034728; GO:0005694; GO:1905634; GO:0048863; GO:0046975; GO:0016279; GO:0006368; GO:0010569; GO:0018026; GO:0032727; GO:0051607; GO:0006298; GO:0005634; GO:0097198; GO:0032465; GO:0018023; GO:0035987; GO:1902850; GO:0018024	Histone-lysine N-methyltransferase SETD2 OS=Mus musculus OX=10090 GN=Setd2 PE=1 SV=1	PF00856.28; PF00397.26; PF17907.1; PF08236.11; PF08711.11	29159_0:000adb	11302at33208	histone-lysine N-methyltransferase SETD2	R-MMU-3214841	PKMTs methylate histone lysines
TRINITY_DN10234_c1_g2_i1					PF10205.9; PF17675.1; PF06785.11; PF09787.9; PF07160.12; PF03938.14; PF06005.12; PF13600.6; PF04977.15; PF07716.15; PF14932.6; PF08317.11; PF08647.11; PF15960.5; PF05266.14; PF06156.13; PF11881.8; PF12325.8; PF15035.6; PF09006.11; PF15186.6	29159_0:000849	19977at33208	signal-induced proliferation-associated 1-like protein 2
TRINITY_DN102341_c0_g1_i1	sp|Q9CZJ2|HS12B_MOUSE	Q9CZJ2	GO:0008150; GO:0005524; GO:0005575; GO:0000166; GO:0003674	Heat shock 70 kDa protein 12B OS=Mus musculus OX=10090 GN=Hspa12b PE=1 SV=1		150288_0:0015a0	32091at7898	heat shock 70 kDa protein 12B	R-MMU-3371453	Regulation of HSF1-mediated heat shock response
TRINITY_DN102344_c0_g1_i1	sp|P32214|CALCR_RAT	P32214	GO:0030424; GO:0007186; GO:0032841; GO:0008528; GO:0007189; GO:0004948; GO:0007166; GO:0004930; GO:0016021; GO:0005886; GO:0004888; GO:0097643; GO:0016020; GO:0007204; GO:0007188; GO:0043025	Calcitonin receptor OS=Rattus norvegicus OX=10116 GN=Calcr PE=2 SV=1		225164_0:000357	1005634at2759	calcitonin gene-related peptide type 1 receptor	R-RNO-418555; R-RNO-419812	G alpha (s) signalling events; Calcitonin-like ligand receptors
TRINITY_DN102350_c0_g1_i1	sp|O95198|KLHL2_HUMAN	O95198	GO:0003779; GO:0005856; GO:0005737; GO:0016567; GO:0015629; GO:0005515; GO:0005829; GO:0043687; GO:0042802; GO:0031463	Kelch-like protein 2 OS=Homo sapiens OX=9606 GN=KLHL2 PE=1 SV=2	PF07707.15; PF00651.31	6565_0:003542	406344at33208	coiled-coil domain-containing protein 51	R-HSA-8951664; R-HSA-983168	Neddylation; Antigen processing: Ubiquitination & Proteasome degradation
TRINITY_DN102354_c0_g1_i1						6565_0:003312	1233632at2759	Reverse transcriptase
TRINITY_DN102355_c0_g1_i1	sp|Q8TD57|DYH3_HUMAN	Q8TD57	GO:0000166; GO:0005856; GO:0005874; GO:0005524; GO:0042995; GO:0005737; GO:0008569; GO:0051959; GO:0030286; GO:0005858; GO:0005929; GO:0060285; GO:0007018; GO:0003777; GO:0045505	Dynein heavy chain 3, axonemal OS=Homo sapiens OX=9606 GN=DNAH3 PE=2 SV=1	PF06646.11; PF12780.7; PF03118.15	225164_0:00420f	1872at33208	dynein heavy chain 3, axonemal
TRINITY_DN102356_c0_g1_i1	sp|P62803|H4_BOVIN	P62803	GO:0000786; GO:0005694; GO:0003677; GO:0005654; GO:0005634; GO:0006334; GO:0006352; GO:0046982	Histone H4 OS=Bos taurus OX=9913 PE=1 SV=2	PF02969.17; PF00808.23; PF07524.13; PF02291.15; PF15511.6; PF15630.6; PF00125.24	29073_0:001ba5	1564596at2759	Histone H3	R-BTA-110330; R-BTA-110331; R-BTA-171306; R-BTA-201722; R-BTA-212300; R-BTA-2299718; R-BTA-2559580; R-BTA-2559582; R-BTA-2559586; R-BTA-3214841; R-BTA-3214842; R-BTA-3214847; R-BTA-3214858; R-BTA-427359; R-BTA-427413; R-BTA-4551638; R-BTA-5250924; R-BTA-5578749; R-BTA-5625886; R-BTA-5693565; R-BTA-5693571; R-BTA-606279; R-BTA-69473; R-BTA-73728; R-BTA-73772; R-BTA-8936459; R-BTA-9018519	Recognition and association of DNA glycosylase with site containing an affected purine; Cleavage of the damaged purine; Packaging Of Telomere Ends; Formation of the beta-catenin:TCF transactivating complex; PRC2 methylates histones and DNA; Condensation of Prophase Chromosomes; Oxidative Stress Induced Senescence; Senescence-Associated Secretory Phenotype (SASP); DNA Damage/Telomere Stress Induce…
TRINITY_DN10236_c0_g1_i1	sp|Q0P5V2|SOBP_MOUSE	Q0P5V2	GO:0090102; GO:0050890; GO:0032184; GO:0046872; GO:0005634; GO:0007626; GO:0007605; GO:0042472	Sine oculis-binding protein homolog OS=Mus musculus OX=10090 GN=Sobp PE=1 SV=1	PF15279.6; PF03107.16; PF06467.14	29159_0:0006e8	1376576at2759	uncharacterized protein LOC107335574
TRINITY_DN102361_c0_g1_i1	sp|P05560|IOVO_DRONO	P05560	GO:0004867; GO:0010951; GO:0010466; GO:0030414; GO:0005576	Ovomucoid OS=Dromaius novaehollandiae OX=8790 PE=1 SV=3	PF00050.21; PF07648.15	6565_0:002431	11284at1206795	Kazal domain
TRINITY_DN102372_c0_g1_i1	sp|P78976|SAR1_HYPJE	P78976	GO:0012507; GO:0000166; GO:0016787; GO:0016192; GO:0005783; GO:0005789; GO:0006886; GO:0015031; GO:0003924; GO:0005794; GO:0031410; GO:0016020; GO:0005525; GO:0000139	Small COPII coat GTPase sar1 OS=Hypocrea jecorina OX=51453 GN=sar1 PE=3 SV=1		103944_0:003afb	1168548at2759	Small GTPase superfamily, ARF/SAR type
TRINITY_DN102373_c0_g1_i1	sp|Q6ZS10|CL17A_HUMAN	Q6ZS10	GO:0009986; GO:0005537; GO:0016021; GO:0005515; GO:0046872; GO:0042802; GO:0016020; GO:0030246; GO:0042806	C-type lectin domain family 17, member A OS=Homo sapiens OX=9606 GN=CLEC17A PE=1 SV=2		51338_0:00195f	146048at9347	C-type lectin domain family 17, member A
TRINITY_DN102379_c0_g1_i1						7739_0:00462c	124461at2759	calcium-activated potassium channel subunit alpha-1
TRINITY_DN10238_c0_g1_i1	sp|Q5RBI7|PDZD7_PONAB	Q5RBI7	GO:0050910; GO:0032420; GO:0042995; GO:0060117; GO:0002142; GO:0060088; GO:0045184; GO:0005634; GO:0005929; GO:0002141	PDZ domain-containing protein 7 OS=Pongo abelii OX=9601 GN=PDZD7 PE=2 SV=2	PF04570.14	29159_0:0004c6	168224at2759	PDZ domain-containing protein 7
TRINITY_DN10239_c0_g1_i3	sp|P80424|LDTI_HIRME	P80424	GO:0010951; GO:0010466; GO:0030414; GO:0004867	Leech-derived tryptase inhibitor C OS=Hirudo medicinalis OX=6421 PE=1 SV=1	PF00050.21; PF07648.15; PF13344.6	6565_0:0055bb	1283825at2759	serine protease inhibitor Kazal-type 5
TRINITY_DN102394_c0_g1_i1	sp|P84023|SMAD3_CHICK	P84023	GO:0007179; GO:0070411; GO:0003677; GO:0006355; GO:0000978; GO:0005737; GO:0071141; GO:0030154; GO:0000981; GO:0030509; GO:0009653; GO:0005634; GO:0005667; GO:0046872; GO:1901203; GO:0060395; GO:0071144; GO:0000987; GO:0003700	Mothers against decapentaplegic homolog 3 OS=Gallus gallus OX=9031 GN=SMAD3 PE=2 SV=1	PF03165.16; PF18634.1	225164_0:0029f8	274383at33208	Mothers against decapentaplegic homolog
TRINITY_DN102396_c0_g1_i1	sp|Q8IX12|CCAR1_HUMAN	Q8IX12	GO:0005641; GO:0045892; GO:0003713; GO:0030374; GO:0005654; GO:0048471; GO:0005737; GO:0006915; GO:0005515; GO:0000398; GO:0043065; GO:0045893	Cell division cycle and apoptosis regulator protein 1 OS=Homo sapiens OX=9606 GN=CCAR1 PE=1 SV=2		6565_0:000de9	2318at6447	cell division cycle and apoptosis regulator protein 1-like isoform X1	R-HSA-72163	mRNA Splicing - Major Pathway
TRINITY_DN102399_c0_g1_i1	sp|Q8CIE6|COPA_MOUSE	Q8CIE6	GO:0030157; GO:0044297; GO:0030424; GO:0006891; GO:0099612; GO:0030126; GO:0005737; GO:0003729; GO:0005576; GO:1902463; GO:0005515; GO:0005794; GO:0030426; GO:0030137; GO:0005615; GO:0000139	Coatomer subunit alpha OS=Mus musculus OX=10090 GN=Copa PE=1 SV=2		6565_0:000131	122926at33208	Coatomer subunit alpha	R-MMU-6807878; R-MMU-6811434	COPI-mediated anterograde transport; COPI-dependent Golgi-to-ER retrograde traffic
TRINITY_DN1024_c0_g1_i9					PF00229.18
TRINITY_DN1024_c1_g1_i6	sp|Q8IXW5|RPAP2_HUMAN	Q8IXW5	GO:0106306; GO:0070940; GO:0016787; GO:0004721; GO:0043175; GO:0042795; GO:0005654; GO:0005737; GO:0005515; GO:0046872; GO:0008420; GO:0005634; GO:0004722; GO:0106307	Putative RNA polymerase II subunit B1 CTD phosphatase RPAP2 OS=Homo sapiens OX=9606 GN=RPAP2 PE=1 SV=1	PF04181.13	6573_0:0020a3	1506260at2759	putative RNA polymerase II subunit B1 CTD phosphatase RPAP2	R-HSA-6807505; R-HSA-6807505	RNA polymerase II transcribes snRNA genes; RNA polymerase II transcribes snRNA genes
TRINITY_DN10240_c0_g1_i3	sp|D3YXG0|HMCN1_MOUSE	D3YXG0	GO:0005938; GO:0007049; GO:0062023; GO:0007156; GO:0005509; GO:0005737; GO:0005576; GO:0007157; GO:0009617; GO:0005201; GO:0032154; GO:0051301; GO:0005604; GO:0030054; GO:0005912	Hemicentin-1 OS=Mus musculus OX=10090 GN=Hmcn1 PE=1 SV=1	PF00090.19	6565_0:0045ff	12213at6447	uncharacterized protein LOC105343589 isoform X1
TRINITY_DN102410_c0_g1_i1	sp|A0A1F4|EYS_DROME	A0A1F4	GO:0042052; GO:0005509; GO:0031012; GO:0097730; GO:0005576; GO:0009986; GO:0010378; GO:0016021; GO:0005201; GO:0005515; GO:0000902; GO:0016020; GO:0005615	Protein eyes shut OS=Drosophila melanogaster OX=7227 GN=eys PE=1 SV=1		7668_0:000ac0	21550at2759	EGF-like calcium-binding, conserved site
TRINITY_DN102411_c0_g1_i1						6573_0:002e79	1369655at2759	uncharacterized protein LOC110456832
TRINITY_DN102414_c0_g1_i1	sp|Q80T79|CSMD3_MOUSE	Q80T79	GO:0016021; GO:0005886; GO:0050773; GO:0003674; GO:0016020	CUB and sushi domain-containing protein 3 OS=Mus musculus OX=10090 GN=Csmd3 PE=1 SV=3		50429_0:0004ee	11503at6101	sushi, von Willebrand factor type A, EGF and pentraxin domain-containing protein 1-like
TRINITY_DN10242_c0_g1_i3	sp|Q0VA03|SUZ12_XENTR	Q0VA03	GO:0035098; GO:0016571; GO:0046872; GO:0031490; GO:0006325; GO:0005634; GO:0042054	Polycomb protein suz12 OS=Xenopus tropicalis OX=8364 GN=suz12 PE=2 SV=1	PF00727.18; PF09733.9	37653_0:0007f9	122694at33208	polycomb protein SUZ12
TRINITY_DN102420_c0_g1_i1	sp|Q875S9|AKR1_LACK1	Q875S9	GO:0016746; GO:0016409; GO:0016740; GO:0031901; GO:0016021; GO:0005794; GO:0019706; GO:0005768; GO:0016020; GO:0018215; GO:0000139	Palmitoyltransferase AKR1 OS=Lachancea kluyveri (strain ATCC 58438 / CBS 3082 / CCRC 21498 / NBRC 1685 / JCM 7257 / NCYC 543 / NRRL Y-12651) OX=226302 GN=AKR1 PE=3 SV=1	PF00023.30; PF13637.6; PF13857.6; PF11927.8; PF00500.18; PF12796.7; PF13606.6	6573_0:004955	1011028at2759	Ankyrin repeat-containing domain
TRINITY_DN102424_c0_g1_i1	sp|P33313|CNS1_YEAST	P33313	GO:0051879; GO:0043022; GO:0042026; GO:0005737; GO:0006457; GO:0005515; GO:0030544	Hsp70/Hsp90 co-chaperone CNS1 OS=Saccharomyces cerevisiae (strain ATCC 204508 / S288c) OX=559292 GN=CNS1 PE=1 SV=1		6573_0:000e61	108at6447	helicase with zinc finger domain 2-like isoform X1
TRINITY_DN102429_c0_g1_i1					PF00910.22
TRINITY_DN10243_c0_g1_i1					PF16679.5; PF05615.13; PF07159.12	6573_0:000747	14480at6447	uncharacterized protein LOC111114642
TRINITY_DN10243_c1_g1_i1					PF06004.12; PF15101.6	6565_0:001425	10566at33208	unconventional myosin-XV
TRINITY_DN10243_c1_g2_i1	sp|Q9UKN7|MYO15_HUMAN	Q9UKN7	GO:0031982; GO:0003779; GO:0007015; GO:0005856; GO:0051015; GO:0000166; GO:0030050; GO:0005524; GO:0042995; GO:0005737; GO:0003774; GO:0000146; GO:0016459; GO:0015629; GO:0030898; GO:0098858; GO:0007605; GO:0005516	Unconventional myosin-XV OS=Homo sapiens OX=9606 GN=MYO15A PE=1 SV=2	PF05210.13	29159_0:004993	10566at33208	unconventional myosin-XV
TRINITY_DN10245_c0_g1_i8					PF01755.17	6565_0:0085fe	480373at2759	glycosyltransferase 2
TRINITY_DN102461_c0_g1_i1						37653_0:002367
TRINITY_DN102474_c0_g1_i1	sp|Q7TQF2|FBX10_MOUSE	Q7TQF2	GO:0016567; GO:0042981; GO:0006511; GO:0005737; GO:0006915	F-box only protein 10 OS=Mus musculus OX=10090 GN=Fbxo10 PE=1 SV=2	PF01696.17; PF12541.8	6573_0:002b1c	146965at33208	F-box only protein 10	R-MMU-8951664; R-MMU-983168	Neddylation; Antigen processing: Ubiquitination & Proteasome degradation
TRINITY_DN10248_c0_g1_i2	sp|P72622|MSRA1_SYNY3	P72622	GO:0036456; GO:0005737; GO:0034599; GO:0006464; GO:0033744; GO:0008113; GO:0016491	Peptide methionine sulfoxide reductase MsrA 1 OS=Synechocystis sp. (strain PCC 6803 / Kazusa) OX=1111708 GN=msrA1 PE=3 SV=1	PF01625.21	6573_0:0043c3	1383773at2759	Peptide methionine sulfoxide reductase
TRINITY_DN102480_c0_g1_i1	sp|Q9GKS6|AT10D_MACFA	Q9GKS6	GO:0000166; GO:0006869; GO:0015914; GO:0000287; GO:0005524; GO:0005783; GO:0005789; GO:0016021; GO:0005886; GO:0046872; GO:0034204; GO:0140326; GO:0016020	Probable phospholipid-transporting ATPase VD (Fragment) OS=Macaca fascicularis OX=9541 GN=ATP10D PE=2 SV=1	PF13246.6	6573_0:003453	37083at33208	Phospholipid-transporting ATPase
TRINITY_DN102486_c0_g1_i1						29159_0:0052b8	21497at33208	E3 ubiquitin-protein ligase RNF213-like
TRINITY_DN10249_c0_g1_i1	sp|Q61188|EZH2_MOUSE	Q61188	GO:0042752; GO:0035098; GO:0070734; GO:0043406; GO:0045892; GO:0003714; GO:0000122; GO:0043547; GO:0005694; GO:0045814; GO:0048387; GO:1990841; GO:0005515; GO:0018024; GO:0071902; GO:0008168; GO:0010718	Histone-lysine N-methyltransferase EZH2 OS=Mus musculus OX=10090 GN=Ezh2 PE=1 SV=2	PF00856.28; PF18118.1; PF18264.1; PF18241.1	6573_0:0056d3	118331at33208	histone-lysine N-methyltransferase EZH1	R-MMU-212300; R-MMU-2559580; R-MMU-3214841; R-MMU-8943724; R-MMU-8953750	PRC2 methylates histones and DNA; Oxidative Stress Induced Senescence; PKMTs methylate histone lysines; Regulation of PTEN gene transcription; Transcriptional Regulation by E2F6
TRINITY_DN102490_c0_g1_i1	sp|Q9NZ63|TLS1_HUMAN	Q9NZ63	GO:0005681; GO:0048024; GO:0005515; GO:0005829; GO:0005654	Telomere length and silencing protein 1 homolog OS=Homo sapiens OX=9606 GN=C9orf78 PE=1 SV=1		225164_0:0012d4	1493869at2759	uncharacterized protein C9orf78 homolog
TRINITY_DN102494_c0_g1_i1	sp|Q8HXX6|SAP3_MACFA	Q8HXX6	GO:0016787; GO:0008047; GO:0006689; GO:0005764; GO:0006629; GO:0006665; GO:0050790	Ganglioside GM2 activator OS=Macaca fascicularis OX=9541 GN=GM2A PE=2 SV=2		6500_0:00425f	10247at6447	ganglioside GM2 activator-like
TRINITY_DN102498_c0_g1_i1	sp|Q9R279|CLCN3_CAVPO	Q9R279	GO:0055037; GO:0005769; GO:0005765; GO:0000166; GO:0005770; GO:0005524; GO:0010008; GO:0030165; GO:0015297; GO:0005764; GO:0031901; GO:0016021; GO:0005247; GO:0005794; GO:0005886; GO:1902476; GO:0031902; GO:0005768; GO:0006811; GO:0016020; GO:0012506	H(+)/Cl(-) exchange transporter 3 OS=Cavia porcellus OX=10141 GN=CLCN3 PE=2 SV=1		6526_0:001b8e	1019at6447	Chloride channel protein
TRINITY_DN10250_c0_g1_i7	sp|P55345|ANM2_HUMAN	P55345	GO:0030331; GO:0045892; GO:0016571; GO:0042803; GO:0016274; GO:0046966; GO:0048588; GO:0042975; GO:0050681; GO:0008469; GO:0005515; GO:0033142; GO:0042974; GO:0008168; GO:2000134; GO:0045893	Protein arginine N-methyltransferase 2 OS=Homo sapiens OX=9606 GN=PRMT2 PE=1 SV=1	PF08241.12; PF08239.11; PF08242.12; PF12847.7; PF08003.11; PF07653.17; PF10294.9; PF13649.6; PF06325.13; PF05175.14; PF02475.16; PF02527.15; PF13489.6; PF14604.6; PF05185.16; PF13847.6; PF03848.14; PF00018.28	7741_0:0012d3	387140at33208	protein arginine N-methyltransferase 6
TRINITY_DN102507_c0_g1_i1						29159_0:001ed8	13606at6447	uncharacterized protein LOC111116454
TRINITY_DN10251_c0_g1_i3	sp|B3EWZ6|MLRP2_ACRMI	B3EWZ6	GO:0016020; GO:0005576	MAM and LDL-receptor class A domain-containing protein 2 (Fragment) OS=Acropora millepora OX=45264 PE=1 SV=1	PF09172.11; PF00057.18; PF00629.23	6573_0:003ec9	27at6447	Low-density lipoprotein (LDL) receptor class A, conserved site
TRINITY_DN102515_c0_g1_i1	sp|G5EBU4|ZAG1_CAEEL	G5EBU4	GO:0045773; GO:0000122; GO:0003677; GO:0006355; GO:0000978; GO:0007275; GO:0000981; GO:0048856; GO:0046872; GO:0005634; GO:0007411; GO:0006357	Zinc finger E-box-binding homeobox protein zag-1 OS=Caenorhabditis elegans OX=6239 GN=zag-1 PE=2 SV=1		114398_0:001066	130237at33208	Zinc finger C2H2 superfamily
TRINITY_DN10252_c0_g1_i3	sp|Q9UHD4|CIDEB_HUMAN	Q9UHD4	GO:0090200; GO:0048471; GO:0016032; GO:0042981; GO:0006915; GO:0008630; GO:0005515; GO:0005829; GO:0010942; GO:0097202	Cell death activator CIDE-B OS=Homo sapiens OX=9606 GN=CIDEB PE=1 SV=2		56723_0:0024ae	111363at7898	cell death activator CIDE-B
TRINITY_DN10253_c0_g1_i3	sp|O97772|CCKAR_RABIT	O97772	GO:0007186; GO:0007165; GO:0004951; GO:0004930; GO:0016021; GO:0005886; GO:0038188; GO:0016020	Cholecystokinin receptor type A OS=Oryctolagus cuniculus OX=9986 GN=CCKAR PE=2 SV=1	PF13853.6; PF10320.9; PF00001.21; PF16192.5	6565_0:0004a6	1476624at2759	allatostatin-A receptor-like
TRINITY_DN102537_c0_g1_i1						6565_0:003f83	147327at33208	toll-like receptor 2
TRINITY_DN102548_c0_g1_i1						6573_0:004df2	116at1206795	neural-cadherin-like
TRINITY_DN102562_c0_g1_i1					PF00760.18
TRINITY_DN10257_c1_g1_i1					PF01683.18
TRINITY_DN102570_c0_g1_i1						29159_0:000800	10841at6447	Chitin binding domain
TRINITY_DN102576_c0_g1_i1	sp|Q96M32|KAD7_HUMAN	Q96M32	GO:0015949; GO:0004127; GO:0016301; GO:0000166; GO:0005524; GO:0042995; GO:0005737; GO:0004017; GO:0006139; GO:0031514; GO:0016740; GO:0016310; GO:0030030; GO:0005829; GO:0005929; GO:0019205; GO:0004550	Adenylate kinase 7 OS=Homo sapiens OX=9606 GN=AK7 PE=1 SV=3		6573_0:0036be	1196at6447	adenylate kinase 7-like	R-HSA-499943	Interconversion of nucleotide di- and triphosphates
TRINITY_DN102579_c0_g1_i1						6573_0:00490a	138195at2759	ABC transporter type 1, transmembrane domain
TRINITY_DN10258_c0_g1_i1	sp|Q5ZLM0|CDC73_CHICK	Q5ZLM0	GO:0034402; GO:0016570; GO:0000122; GO:0045638; GO:0007049; GO:0008285; GO:0071222; GO:0032968; GO:0006368; GO:0016593; GO:0031442; GO:0006357; GO:0000993; GO:0001711; GO:0005634; GO:1902808; GO:0030177; GO:0006378; GO:0019827; GO:2000134; GO:0043066	Parafibromin OS=Gallus gallus OX=9031 GN=CDC73 PE=2 SV=1	PF15152.6	37653_0:00007b	2808at6447	parafibromin-like	R-GGA-201722; R-GGA-674695; R-GGA-75955	Formation of the beta-catenin:TCF transactivating complex; RNA Polymerase II Pre-transcription Events; RNA Polymerase II Transcription Elongation
TRINITY_DN102588_c0_g1_i1						1720309_0:001616	1132041at2759	uncharacterized protein LOC105440843
TRINITY_DN102589_c0_g1_i1						6573_0:0007ed	1330at6447	uncharacterized protein LOC110467151
TRINITY_DN102599_c0_g1_i1	sp|O00533|NCHL1_HUMAN	O00533	GO:0007155; GO:0007165; GO:0007275; GO:0030154; GO:0005576; GO:0016021; GO:0005886; GO:0070062; GO:0007411; GO:0007399; GO:0031103; GO:0016020	Neural cell adhesion molecule L1-like protein OS=Homo sapiens OX=9606 GN=CHL1 PE=1 SV=4	PF00041.21	6565_0:000578	1941at1206795	contactin-like	R-HSA-447041	CHL1 interactions
TRINITY_DN10260_c0_g1_i1					PF16026.5	29159_0:001ec6	16621at6447	uncharacterized protein LOC105332159
TRINITY_DN102600_c0_g1_i1						6565_0:006803	172711at33208	Protein kinase domain
TRINITY_DN10261_c0_g1_i2	sp|Q8HZV4|TBD_CANLF	Q8HZV4	GO:0000278; GO:0000166; GO:0005856; GO:0005874; GO:0005814; GO:0042995; GO:0005737; GO:0007275; GO:0007017; GO:0003924; GO:0030030; GO:0005200; GO:0045880; GO:0005634; GO:0005929; GO:0000226; GO:0005525	Tubulin delta chain OS=Canis lupus familiaris OX=9615 GN=TUBD1 PE=2 SV=1	PF00091.25; PF13809.6	6573_0:000454	1166669at2759	Tubulin
TRINITY_DN102621_c0_g1_i1	sp|Q6NV26|SDA1_DANRE	Q6NV26	GO:0042254; GO:0030036; GO:0015031; GO:0005634; GO:0000055; GO:0042273; GO:0005730	Protein SDA1 homolog OS=Danio rerio OX=7955 GN=sdad1 PE=2 SV=1	PF05285.12	6573_0:003629	270594at33208	protein SDA1 homolog
TRINITY_DN102625_c0_g1_i1						29159_0:003989	1318335at2759	Zinc finger C2H2 superfamily
TRINITY_DN102626_c0_g1_i1	sp|P21359|NF1_HUMAN	P21359	GO:0030325; GO:0014044; GO:0045685; GO:0045762; GO:0001656; GO:0048593; GO:0001937; GO:0030424; GO:0007154; GO:0030036; GO:0005096; GO:0048844; GO:0048745; GO:0048485; GO:0030425; GO:0048853; GO:0021510; GO:0014065; GO:0001666; GO:0007265; GO:0045124; GO:0048715; GO:0001649; GO:0042060	Neurofibromin OS=Homo sapiens OX=9606 GN=NF1 PE=1 SV=2		6573_0:00389b	44at1206795	neurofibromin-like	R-HSA-5658442; R-HSA-6802949; R-HSA-6802953	Regulation of RAS by GAPs; Signaling by RAS mutants; RAS signaling downstream of NF1 loss-of-function variants
TRINITY_DN10263_c0_g1_i4	sp|Q2IBA6|MET_CHLAE	Q2IBA6	GO:0000166; GO:0071526; GO:0005524; GO:0004672; GO:0017154; GO:0006468; GO:0016740; GO:0016310; GO:0016021; GO:0004713; GO:0007169; GO:0016020; GO:0018108; GO:0004714; GO:0016301	Hepatocyte growth factor receptor OS=Chlorocebus aethiops OX=9534 GN=MET PE=1 SV=1	PF00069.25; PF15102.6; PF01761.20; PF01034.20; PF01833.24; PF07714.17; PF01102.18; PF08693.10	6573_0:000e7a	56043at33208	plexin-B2
TRINITY_DN10263_c0_g2_i1	sp|P39059|COFA1_HUMAN	P39059	GO:0005582; GO:0005581; GO:0005788; GO:0007155; GO:0031012; GO:0001886; GO:0030198; GO:0005576; GO:0030154; GO:0007275; GO:0005201; GO:0007165; GO:0001525; GO:0070062; GO:0016021; GO:0030199; GO:0005615; GO:0030574	Collagen alpha-1(XV) chain OS=Homo sapiens OX=9606 GN=COL15A1 PE=1 SV=2	PF01391.18; PF06482.11; PF07588.11	136037_0:001b51	1362001at2759	collagen alpha-1(XV) chain	R-HSA-1442490; R-HSA-1650814; R-HSA-2022090; R-HSA-8948216	Collagen degradation; Collagen biosynthesis and modifying enzymes; Assembly of collagen fibrils and other multimeric structures; Collagen chain trimerization
TRINITY_DN102639_c0_g1_i1					PF00084.20
TRINITY_DN10264_c0_g1_i2	sp|Q96MB7|HARB1_HUMAN	Q96MB7	GO:0034451; GO:0016787; GO:0005737; GO:0005886; GO:0046872; GO:0004518; GO:0005634; GO:0005829; GO:0090305	Putative nuclease HARBI1 OS=Homo sapiens OX=9606 GN=HARBI1 PE=1 SV=1	PF04827.14; PF13551.6; PF13384.6; PF04545.16; PF13613.6; PF01609.21; PF13586.6; PF13359.6	6565_0:0031e9	10487at6447	putative nuclease HARBI1
TRINITY_DN10265_c0_g1_i4					PF17857.1; PF01632.19
TRINITY_DN102651_c0_g1_i1	sp|Q2NKQ1|SGSM1_HUMAN	Q2NKQ1	GO:0005096; GO:0090630; GO:0005737; GO:0030659; GO:0006886; GO:0005515; GO:0005794; GO:0005829; GO:0031410; GO:0016020; GO:0031267	Small G protein signaling modulator 1 OS=Homo sapiens OX=9606 GN=SGSM1 PE=1 SV=2	PF00566.18	6573_0:005409	171826at2759	Small G protein signaling modulator 2
TRINITY_DN102652_c0_g1_i1	sp|Q19791|GON1_CAEEL	Q19791	GO:0006888; GO:0008406; GO:0008237; GO:1905607; GO:0016787; GO:0006508; GO:0016192; GO:0005783; GO:0007275; GO:0031012; GO:0030198; GO:0005576; GO:0015031; GO:0008233; GO:0005604; GO:0005794; GO:0046872; GO:0016477; GO:0004222; GO:0048644	A disintegrin and metalloproteinase with thrombospondin motifs gon-1 OS=Caenorhabditis elegans OX=6239 GN=gon-1 PE=1 SV=3	PF00090.19; PF12779.7	146911_0:0039d2	125522at2759	Thrombospondin type-1 (TSP1) repeat	R-CEL-5173214	O-glycosylation of TSR domain-containing proteins
TRINITY_DN102658_c0_g1_i1	sp|Q96QT4|TRPM7_HUMAN	Q96QT4	GO:0005261; GO:0005524; GO:0098655; GO:0016740; GO:0016021; GO:0046872; GO:0016020; GO:0005887; GO:0006812; GO:0006816; GO:0006468; GO:0070266; GO:0005262; GO:0004674; GO:0010961; GO:0016310; GO:0072507; GO:0030001; GO:0000166; GO:0012501; GO:0006811; GO:0005216; GO:0016301	Transient receptor potential cation channel subfamily M member 7 OS=Homo sapiens OX=9606 GN=TRPM7 PE=1 SV=1		225164_0:0040bf	1587at6447	transient receptor potential cation channel subfamily M member 5-like	R-HSA-3295583	TRP channels
TRINITY_DN10266_c0_g1_i4					PF13679.6; PF07757.13; PF03602.15; PF07021.12; PF05175.14
TRINITY_DN102663_c0_g1_i1	sp|Q13349|ITAD_HUMAN	Q13349	GO:0008305; GO:0006955; GO:0034113; GO:0007155; GO:0030198; GO:0009986; GO:0016021; GO:0005886; GO:0046872; GO:0016020; GO:0007229	Integrin alpha-D OS=Homo sapiens OX=9606 GN=ITGAD PE=1 SV=2	PF00092.28	6565_0:002a82	1049829at2759	collagen alpha-6(VI) chain	R-HSA-216083	Integrin cell surface interactions
TRINITY_DN102666_c0_g1_i1						7574_0:0034a7	13468at1206795	uncharacterized protein LOC106152279
TRINITY_DN102667_c0_g1_i1	sp|P06280|AGAL_HUMAN	P06280	GO:0004557; GO:0035578; GO:0016787; GO:0042803; GO:0052692; GO:0006687; GO:0046479; GO:0043202; GO:0005576; GO:0005764; GO:0005102; GO:0043312; GO:0005515; GO:0016798; GO:0009311; GO:0003824; GO:0008152; GO:0004553; GO:0017041; GO:0005975	Alpha-galactosidase A OS=Homo sapiens OX=9606 GN=GLA PE=1 SV=1		225164_0:001642	266390at33208	Alpha-galactosidase	R-HSA-1660662; R-HSA-6798695	Glycosphingolipid metabolism; Neutrophil degranulation
TRINITY_DN102687_c0_g1_i1	sp|Q8N0N9|ODH_HALDH	Q8N0N9	GO:0016491	Opine dehydrogenase OS=Haliotis discus hannai OX=42344 GN=tadh PE=2 SV=1		6573_0:0031e1	1107842at2759	6-phosphogluconate dehydrogenase, domain 2
TRINITY_DN10269_c0_g1_i2	sp|Q92890|UFD1_HUMAN	Q92890	GO:0006511; GO:0001501; GO:0039536; GO:0030970; GO:0016579; GO:0005654; GO:0036501; GO:0005737; GO:0031593; GO:0004843; GO:0043161; GO:0032480; GO:0034098; GO:0005515; GO:0005634; GO:0071712; GO:0018215; GO:0030433	Ubiquitin recognition factor in ER-associated degradation protein 1 OS=Homo sapiens OX=9606 GN=UFD1 PE=1 SV=3		6573_0:00423c	1134444at2759	Ubiquitin fusion degradation protein 1	R-HSA-110320; R-HSA-5689880	Translesion Synthesis by POLH; Ub-specific processing proteases
TRINITY_DN1027_c0_g1_i3	sp|Q29RT0|RBMX_BOVIN	Q29RT0	GO:0005681; GO:0000381; GO:0006366; GO:0044530; GO:0000978; GO:0071013; GO:0003729; GO:0003723; GO:0000791; GO:0048025; GO:0071347; GO:0070062; GO:0045944; GO:0005634; GO:0006509; GO:0051260; GO:0003682; GO:0048026	RNA-binding motif protein, X chromosome OS=Bos taurus OX=9913 GN=RBMX PE=2 SV=1	PF16367.5; PF00076.22	29159_0:0053f0	11382at6447	uncharacterized protein LOC105317230
TRINITY_DN102707_c0_g1_i1						6573_0:00032b	10894at6447	Homeobox domain
TRINITY_DN102709_c0_g1_i1						225164_0:000411	181003at2759	EGF-like, conserved site
TRINITY_DN102710_c0_g1_i1	sp|O16025|AOSL_PLEHO	O16025	GO:0016702; GO:0047987; GO:0031408; GO:0098869; GO:0009978; GO:0006633; GO:0005737; GO:0047677; GO:0051213; GO:0016829; GO:0006629; GO:0016491; GO:0005506; GO:0046872; GO:0003824; GO:0006631; GO:0016020; GO:0008152; GO:0019369; GO:0020037; GO:0004096	Allene oxide synthase-lipoxygenase protein OS=Plexaura homomalla OX=47982 PE=1 SV=1	PF11428.8; PF00305.19	7739_0:004a3f	283245at33208	arachidonate 12-lipoxygenase, 12R-type
TRINITY_DN102711_c0_g1_i1						8078_0:001956	1318796at2759	THAP-type zinc finger
TRINITY_DN102714_c0_g1_i1	sp|Q5R629|ARMC9_PONAB	Q5R629	GO:0036064; GO:0005856; GO:0005814; GO:0097542; GO:0042995; GO:0005737; GO:0030030; GO:0045880; GO:0005929; GO:0060271	LisH domain-containing protein ARMC9 OS=Pongo abelii OX=9601 GN=ARMC9 PE=2 SV=1		6565_0:00420e	1327587at2759	lisH domain-containing protein ARMC9
TRINITY_DN102716_c0_g1_i1	sp|Q9Z2I7|SVOP_RAT	Q9Z2I7	GO:0055085; GO:0045202; GO:0016021; GO:0030054; GO:0022857; GO:0031410; GO:0016020; GO:0008021; GO:0030672	Synaptic vesicle 2-related protein OS=Rattus norvegicus OX=10116 GN=Svop PE=1 SV=1		6565_0:003d4e	1430447at2759	Major facilitator superfamily
TRINITY_DN102726_c0_g1_i1	sp|O24653|GDI2_ARATH	O24653	GO:0005096; GO:0043547; GO:0007264; GO:0005092; GO:0016192; GO:0005737; GO:0005093; GO:0015031; GO:0009506; GO:0005829; GO:0048046; GO:0050790	Guanosine nucleotide diphosphate dissociation inhibitor 2 OS=Arabidopsis thaliana OX=3702 GN=GDI2 PE=2 SV=1		7741_0:0003d8	388394at33208	Rab GDP dissociation inhibitor
TRINITY_DN10273_c0_g1_i7	sp|Q96MM6|HS12B_HUMAN	Q96MM6	GO:0005524; GO:0005515; GO:0000166	Heat shock 70 kDa protein 12B OS=Homo sapiens OX=9606 GN=HSPA12B PE=1 SV=2	PF00012.20; PF01869.20	29159_0:001912	12604at6447	heat shock 70 kDa protein 12A	R-HSA-3371453	Regulation of HSF1-mediated heat shock response
TRINITY_DN102732_c0_g1_i1						6526_0:005042	1318335at2759	Zinc finger C2H2 superfamily
TRINITY_DN10274_c2_g1_i1					PF06818.15; PF14362.6; PF15665.5; PF13851.6; PF12709.7; PF11559.8; PF17045.5; PF15084.6; PF09789.9; PF12652.7; PF00038.21	6573_0:001028	1490346at2759	protein FAM184A-like
TRINITY_DN102740_c0_g1_i1	sp|Q9D6R2|IDH3A_MOUSE	Q9D6R2	GO:0004449; GO:0000287; GO:0016616; GO:0006103; GO:0051287; GO:0046872; GO:0006099; GO:0006734; GO:0006102; GO:0005739; GO:0016491	Isocitrate dehydrogenase [NAD] subunit alpha, mitochondrial OS=Mus musculus OX=10090 GN=Idh3a PE=1 SV=1		6500_0:000ae1	325037at33208	isocitrate dehydrogenase	R-MMU-71403	Citric acid cycle (TCA cycle)
TRINITY_DN102745_c0_g1_i1					PF15823.5; PF03612.14; PF17325.2
TRINITY_DN10275_c0_g1_i3					PF13413.6; PF01496.19; PF05576.11
TRINITY_DN102753_c0_g1_i1						6565_0:00408e	1779at6447	uncharacterized protein K02A2.6-like
TRINITY_DN102758_c0_g1_i1						6526_0:0016f0	3800at6447	uncharacterized protein LOC101856472
TRINITY_DN10276_c0_g1_i5					PF16377.5
TRINITY_DN102762_c0_g1_i1	sp|Q94887|NRX4_DROME	Q94887	GO:0045216; GO:0008039; GO:0008104; GO:0019991; GO:0035151; GO:0045202; GO:0060857; GO:0005919; GO:0003015; GO:0016021; GO:0005886; GO:0072553; GO:0097105; GO:0061343; GO:0021682; GO:0005918; GO:0008366; GO:0016020; GO:0048786; GO:0030054; GO:0007391	Neurexin-4 OS=Drosophila melanogaster OX=7227 GN=Nrx-IV PE=1 SV=2	PF00754.25	6573_0:0036ea	211373at33208	Milk fat globule-EGF factor 8 protein
TRINITY_DN102765_c0_g1_i1	sp|P15800|LAMB2_RAT	P15800	GO:0000904; GO:0005178; GO:0014044; GO:0072274; GO:0009888; GO:0005608; GO:0043256; GO:0070831; GO:0007155; GO:0007528; GO:0005576; GO:0005201; GO:0005604; GO:0007411; GO:0031175; GO:0045202; GO:0016477; GO:0060041; GO:0034446; GO:0031594; GO:0009887	Laminin subunit beta-2 OS=Rattus norvegicus OX=10116 GN=Lamb2 PE=1 SV=1		6526_0:0024ae	290at6447	laminin subunit beta-1-like	R-RNO-3000157; R-RNO-381426; R-RNO-8874081; R-RNO-8957275	Laminin interactions; Regulation of Insulin-like Growth Factor (IGF) transport and uptake by Insulin-like Growth Factor Binding Proteins (IGFBPs); MET activates PTK2 signaling; Post-translational protein phosphorylation
TRINITY_DN102778_c0_g1_i1						411798_0:000746	1072875at2759	Transposase family Tnp2 protein
TRINITY_DN102785_c0_g1_i1						7574_0:00512d	208300at33208	Fibronectin type III
TRINITY_DN102786_c0_g1_i1						6565_0:006978	101at6447	uncharacterized protein LOC106055997
TRINITY_DN102789_c0_g1_i1	sp|Q9ET22|DPP2_MOUSE	Q9ET22	GO:0008239; GO:0043231; GO:0031982; GO:0008236; GO:0016787; GO:0006508; GO:0005764; GO:0005576; GO:0004177; GO:0008233; GO:1905146; GO:0005794; GO:0005829; GO:0031410	Dipeptidyl peptidase 2 OS=Mus musculus OX=10090 GN=Dpp7 PE=1 SV=2		29159_0:005e0f	245747at33208	dipeptidyl peptidase 2	R-MMU-6798695	Neutrophil degranulation
TRINITY_DN10279_c0_g1_i5					PF03511.14; PF00643.24; PF10303.9; PF07529.13; PF01436.21; PF15011.6	6573_0:00058d
TRINITY_DN102794_c0_g1_i1	sp|Q6PBI5|RS25_DANRE	Q6PBI5	GO:0003735; GO:0022627; GO:0005840	40S ribosomal protein S25 OS=Danio rerio OX=7955 GN=rps25 PE=2 SV=1		48498_0:00090e	10539at6101	40S ribosomal protein S25-like	R-DRE-1799339; R-DRE-72695; R-DRE-72702; R-DRE-72706; R-DRE-975956; R-DRE-975957	SRP-dependent cotranslational protein targeting to membrane; Formation of the ternary complex, and subsequently, the 43S complex; Ribosomal scanning and start codon recognition; GTP hydrolysis and joining of the 60S ribosomal subunit; Nonsense Mediated Decay (NMD) independent of the Exon Junction Complex (EJC); Nonsense Mediated Decay (NMD) enhanced by the Exon Junction Complex (EJC)
TRINITY_DN1028_c0_g1_i13					PF16574.5; PF16888.5; PF10046.9; PF01987.17; PF09744.9; PF10552.9; PF05461.11; PF00038.21; PF04136.15; PF13851.6; PF08317.11; PF10473.9; PF02465.18; PF07889.12; PF14662.6; PF04513.12; PF13863.6; PF16559.5; PF12718.7; PF07926.12
TRINITY_DN102805_c0_g1_i1	sp|Q02246|CNTN2_HUMAN	Q02246	GO:0030424; GO:0097090; GO:0043209; GO:0071205; GO:0098632; GO:0007156; GO:0007155; GO:0031225; GO:0045163; GO:0005886; GO:0007411; GO:0005515; GO:0007399; GO:0042802; GO:0070593; GO:0016020; GO:0033268; GO:0031175	Contactin-2 OS=Homo sapiens OX=9606 GN=CNTN2 PE=1 SV=1	PF00041.21	29159_0:004e62	208655at33208	Immunoglobulin-like domain	R-HSA-373760; R-HSA-419037; R-HSA-447038	L1CAM interactions; NCAM1 interactions; NrCAM interactions
TRINITY_DN102809_c0_g1_i1	sp|Q7RTV0|PHF5A_HUMAN	Q7RTV0	GO:0005681; GO:0008380; GO:0003677; GO:0005654; GO:0003723; GO:0006397; GO:0046872; GO:0000398; GO:0005634; GO:0005515; GO:0016363; GO:0045893	PHD finger-like domain-containing protein 5A OS=Homo sapiens OX=9606 GN=PHF5A PE=1 SV=1		52283_0:0005a7	143605at6656	PHD finger-like domain-containing protein 5A	R-HSA-72163	mRNA Splicing - Major Pathway
TRINITY_DN102810_c0_g1_i1					PF05887.11
TRINITY_DN10282_c0_g3_i1	sp|Q0VFN8|CF157_XENTR	Q0VFN8	GO:0036064; GO:0005856; GO:0042995; GO:0005737; GO:0007288; GO:0008017; GO:0005929	Cilia- and flagella-associated protein 157 OS=Xenopus tropicalis OX=8364 GN=cfap157 PE=2 SV=1	PF06696.11	6573_0:000874	1171749at2759	uncharacterized protein C9orf117 homolog
TRINITY_DN102821_c0_g1_i1	sp|A7T1N0|TMP2L_NEMVE	A7T1N0	GO:0005261; GO:0005887; GO:0015280; GO:0005272; GO:0005262; GO:0098655; GO:0006816; GO:0016021; GO:0005886; GO:0046872; GO:0035725; GO:0019722; GO:0016020; GO:0099604; GO:0006811; GO:0030001; GO:0006814; GO:0070588	Transient receptor potential cation channel subfamily M member-like 2 OS=Nematostella vectensis OX=45351 GN=TRPM2 PE=1 SV=1	PF15839.5	6565_0:00159a	1587at6447	transient receptor potential cation channel subfamily M member 5-like
TRINITY_DN102823_c0_g1_i1						225164_0:004104	10382at6447	HTH CenpB-type DNA-binding domain
TRINITY_DN102840_c0_g1_i1	sp|Q8K3K1|USH2A_RAT	Q8K3K1	GO:1990696; GO:0001917; GO:0032391; GO:0005886; GO:0005604; GO:0045184; GO:0016020; GO:0005576; GO:0043195; GO:0045202; GO:0007605; GO:0016477; GO:0043025; GO:0009887; GO:0050896; GO:0042995; GO:0007601; GO:1990075; GO:0034446; GO:0032420; GO:0009888; GO:0002142; GO:0002141	Usherin OS=Rattus norvegicus OX=10116 GN=Ush2a PE=1 SV=2		6500_0:0031e6	33at1206795	usherin-like
TRINITY_DN102844_c0_g1_i1						114398_0:0046c9	106866at6656	mid1-interacting protein 1A
TRINITY_DN102848_c0_g1_i1						597456_0:002247	101807at6656	histone-lysine N-methyltransferase SETMAR-like
TRINITY_DN102849_c0_g1_i1	sp|Q8IWF2|FXRD2_HUMAN	Q8IWF2	GO:0005788; GO:0005783; GO:0050660; GO:0005515; GO:0016491; GO:0030433	FAD-dependent oxidoreductase domain-containing protein 2 OS=Homo sapiens OX=9606 GN=FOXRED2 PE=1 SV=1		6565_0:001302	1766at6447	FAD-dependent oxidoreductase domain-containing protein 2-like
TRINITY_DN102850_c0_g1_i1	sp|O70472|TM131_MOUSE	O70472	GO:0016020; GO:0003674; GO:0016021	Transmembrane protein 131 OS=Mus musculus OX=10090 GN=Tmem131 PE=2 SV=2		225164_0:002dd7	110177at2759	transmembrane protein 131-like isoform X1
TRINITY_DN102863_c0_g1_i1					PF18035.1; PF12220.8; PF08192.11; PF15188.6; PF13476.6	6573_0:005707	145016at2759	centrosome-associated protein 350
TRINITY_DN102864_c0_g1_i1	sp|O02194|PSN_DROME	O02194	GO:0034205; GO:0004175; GO:0006508; GO:0007219; GO:0007220; GO:0004190; GO:0016021; GO:0005515; GO:0006509; GO:0016485; GO:0035333	Presenilin homolog OS=Drosophila melanogaster OX=7227 GN=Psn PE=1 SV=2	PF01080.17	225164_0:000d44	357270at33208	Presenilin	R-DME-1251985; R-DME-6798695	Nuclear signaling by ERBB4; Neutrophil degranulation
TRINITY_DN102866_c0_g1_i1					PF01490.18	6500_0:004808	284074at33208	proton-coupled amino acid transporter 4
TRINITY_DN102868_c0_g1_i1	sp|O01991|EF2K_CAEEL	O01991	GO:0004686; GO:0000166; GO:0005509; GO:0005524; GO:0004674; GO:0006468; GO:0016740; GO:0016310; GO:0005516; GO:0016301	Eukaryotic elongation factor 2 kinase OS=Caenorhabditis elegans OX=6239 GN=efk-1 PE=1 SV=1		70779_0:000d07	102366at2759	alpha-protein kinase 1	R-CEL-166208	mTORC1-mediated signalling
TRINITY_DN102877_c0_g1_i1	sp|P46595|UBC4_SCHPO	P46595	GO:0006511; GO:0000166; GO:0060049; GO:0005524; GO:0004842; GO:0035103; GO:0045842; GO:0031625; GO:0016740; GO:0031146; GO:0005634; GO:0000209; GO:0061631; GO:0000151	Ubiquitin-conjugating enzyme E2 4 OS=Schizosaccharomyces pombe (strain 972 / ATCC 24843) OX=284812 GN=ubc4 PE=1 SV=1		6669_0:007004	12161at6657	Effete protein/ubiquitin ligase-like protein	R-SPO-141430; R-SPO-174154; R-SPO-174178; R-SPO-176407; R-SPO-176408; R-SPO-176409; R-SPO-176412; R-SPO-179409; R-SPO-2467813; R-SPO-9033241; R-SPO-983168	Inactivation of APC/C via direct inhibition of the APC/C complex; APC/C:Cdc20 mediated degradation of Securin; APC/C:Cdh1 mediated degradation of Cdc20 and other APC/C:Cdh1 targeted proteins in late mitosis/early G1; Conversion from APC/C:Cdc20 to APC/C:Cdh1 in late anaphase; Regulation of APC/C activators between G1/S and early anaphase; APC/C:Cdc20 mediated degradation of mitotic proteins; Phos…
TRINITY_DN10288_c0_g1_i1	sp|P0DMQ6|DHSO_CHICK	P0DMQ6	GO:0008270; GO:0006000; GO:0046370; GO:0006735; GO:0006061; GO:0006116; GO:0042995; GO:0006062; GO:0051160; GO:0031514; GO:0051287; GO:0046872; GO:0005929; GO:0003939; GO:0042802; GO:0016020; GO:0005739; GO:0032991; GO:0016491	Sorbitol dehydrogenase OS=Gallus gallus OX=9031 GN=SORD PE=1 SV=1	PF13602.6; PF07992.14; PF01262.21; PF08240.12; PF16912.5; PF00107.26; PF00670.21	6565_0:004c01	1019156at2759	Alcohol dehydrogenase, N-terminal	R-GGA-5652227; R-GGA-5661270	Fructose biosynthesis; Formation of xylulose-5-phosphate
TRINITY_DN102895_c0_g1_i1						6526_0:000e77	1393341at2759	Disease resistance protein (TIR-NBS-LRR class)
TRINITY_DN102896_c0_g1_i1	sp|Q8K4L3|SVIL_MOUSE	Q8K4L3	GO:0051016; GO:0003779; GO:0005856; GO:0051015; GO:0043034; GO:0005546; GO:0030496; GO:0042995; GO:0005737; GO:0032154; GO:0032467; GO:0008154; GO:0015629; GO:0005886; GO:0005829; GO:0036449; GO:0007519; GO:0007010; GO:0051014	Supervillin OS=Mus musculus OX=10090 GN=Svil PE=1 SV=1		6573_0:0016be	1376537at2759	Gelsolin-like domain
TRINITY_DN1029_c0_g1_i5	sp|Q27371|TNNT_CAEEL	Q27371	GO:0005861; GO:0006937; GO:0006936; GO:0007413; GO:0045214; GO:0030728; GO:0007526; GO:0048598; GO:0005523	Troponin T OS=Caenorhabditis elegans OX=6239 GN=mup-2 PE=2 SV=1	PF10044.9; PF00992.20; PF18699.1	6526_0:0052f1	10607at6447	Troponin
TRINITY_DN10290_c0_g1_i3	sp|O60449|LY75_HUMAN	O60449	GO:0038023; GO:0006954; GO:0006897; GO:0006955; GO:0005887; GO:0016021; GO:0005515; GO:0070062; GO:0009897; GO:0016020; GO:0030246	Lymphocyte antigen 75 OS=Homo sapiens OX=9606 GN=LY75 PE=1 SV=3	PF05966.12; PF15345.6; PF00059.21	6565_0:000aa0	254639at33208	macrophage mannose receptor 1-like
TRINITY_DN102905_c0_g1_i1	sp|H2A0M3|AMO_PINMG	H2A0M3	GO:0048038; GO:0009308; GO:0005576; GO:0016491; GO:0046872; GO:0005507; GO:0008131	Putative amine oxidase [copper-containing] OS=Margaritifera margaritifera OX=102329 PE=1 SV=1		29159_0:005b94	1320015at2759	Amine oxidase
TRINITY_DN102906_c0_g1_i1						6573_0:00280f	1393641at2759	uncharacterized protein LOC110988271
TRINITY_DN102916_c0_g1_i1						6573_0:004175	144506at2759	tyrosine-protein phosphatase non-receptor type 14
TRINITY_DN102918_c0_g1_i1	sp|Q23716|EF2_CRYPV	Q23716	GO:0000166; GO:0006414; GO:0005737; GO:0003924; GO:0003746; GO:0006412; GO:0005525	Elongation factor 2 OS=Cryptosporidium parvum OX=5807 PE=3 SV=1	PF09457.10; PF03764.18; PF00679.24	9755_0:004953	140796at2759	elongation factor 2
TRINITY_DN102922_c0_g1_i1	sp|Q5SQS7|SH24B_HUMAN	Q5SQS7	GO:0005737	SH2 domain-containing protein 4B OS=Homo sapiens OX=9606 GN=SH2D4B PE=2 SV=1		37653_0:00259c	340205at33208	SH2 domain-containing protein 4A
TRINITY_DN10293_c0_g1_i10	sp|O62640|PIAP_PIG	O62640	GO:0051726; GO:0043027; GO:0042981; GO:0005737; GO:0016567; GO:0006915; GO:0043154; GO:0046872; GO:0005634; GO:0031398; GO:0060546; GO:0061630; GO:0043066	Putative inhibitor of apoptosis OS=Sus scrofa OX=9823 GN=PIAP PE=2 SV=1	PF09531.10	121530_0:000825	1340284at2759	baculoviral IAP repeat-containing protein 7
TRINITY_DN102930_c0_g1_i1	sp|Q5VT25|MRCKA_HUMAN	Q5VT25	GO:0030036; GO:0005856; GO:0030027; GO:0005524; GO:0004672; GO:0005737; GO:0004674; GO:0031032; GO:0018107; GO:0006468; GO:0042995; GO:0016740; GO:0046872; GO:0035556; GO:0016477; GO:0042641; GO:0016301	Serine/threonine-protein kinase MRCK alpha OS=Homo sapiens OX=9606 GN=CDC42BPA PE=1 SV=1		6526_0:002c5a	117302at33208	serine/threonine-protein kinase MRCK beta
TRINITY_DN102935_c0_g1_i1						6565_0:00608c	1031088at2759	reverse transcriptase ribonuclease h
TRINITY_DN10295_c0_g1_i6	sp|Q19546|WRN_CAEEL	Q19546	GO:0000723; GO:0005694; GO:0000166; GO:0003677; GO:0005654; GO:0004386; GO:0003676; GO:0005737; GO:0005524; GO:0044237; GO:0006268; GO:0006281; GO:0032508; GO:0000724; GO:0009378; GO:0044806; GO:0005634; GO:0006260; GO:0006310; GO:0043138; GO:0010259	Probable Werner syndrome ATP-dependent helicase homolog 1 OS=Caenorhabditis elegans OX=6239 GN=wrn-1 PE=3 SV=2	PF00271.31	29159_0:001b3a	1539863at2759	uncharacterized protein LOC105331045	R-CEL-5685938; R-CEL-5693607	HDR through Single Strand Annealing (SSA); Processing of DNA double-strand break ends
TRINITY_DN10295_c0_g2_i3					PF03221.16	6565_0:004718	10382at6447	HTH CenpB-type DNA-binding domain
TRINITY_DN10295_c1_g1_i6	sp|Q24307|DIAP2_DROME	Q24307	GO:0008270; GO:0006511; GO:0043027; GO:0048471; GO:0005737; GO:0006915; GO:0016567; GO:0031625; GO:0043154; GO:0043281; GO:0070534; GO:0089720; GO:0070936; GO:0005515; GO:0022416; GO:0061630; GO:0043066	Death-associated inhibitor of apoptosis 2 OS=Drosophila melanogaster OX=7227 GN=Diap2 PE=1 SV=3	PF13920.6; PF13639.6; PF14447.6	6500_0:002e0b	1340284at2759	baculoviral IAP repeat-containing protein 7	R-DME-111465; R-DME-111469; R-DME-209447; R-DME-209447; R-DME-3769402; R-DME-5675482; R-DME-8948747; R-DME-8948751	Apoptotic cleavage of cellular proteins; SMAC, XIAP-regulated apoptotic response; Activation of the IkappaB kinase complex, KEY:IRD5 dimer:KEY; Activation of the IkappaB kinase complex, KEY:IRD5 dimer:KEY; Deactivation of the beta-catenin transactivating complex; Regulation of necroptotic cell death; Regulation of PTEN localization; Regulation of PTEN stability and activity
TRINITY_DN10295_c2_g1_i1	sp|Q9VCX3|RM45_DROME	Q9VCX3	GO:0003735; GO:0005739; GO:0005840; GO:0005762; GO:0032543	Probable 39S ribosomal protein L45, mitochondrial OS=Drosophila melanogaster OX=7227 GN=mRpL45 PE=2 SV=1	PF04280.15; PF07961.11	7237_0:000218	1121890at2759	39S ribosomal protein L45, mitochondrial	R-DME-5389840; R-DME-5419276	Mitochondrial translation elongation; Mitochondrial translation termination
TRINITY_DN102959_c0_g1_i1	sp|Q5E9F9|PRS7_BOVIN	Q5E9F9	GO:1901800; GO:0016887; GO:0000166; GO:0006511; GO:0017025; GO:0005524; GO:0000932; GO:0005737; GO:0036402; GO:0022624; GO:0043197; GO:0030163; GO:0000502; GO:0036464; GO:0005634; GO:0005829; GO:0045899; GO:0008540	26S proteasome regulatory subunit 7 OS=Bos taurus OX=9913 GN=PSMC2 PE=2 SV=3	PF12641.7	29159_0:00322f	2230at6447	26S protease regulatory subunit 7	R-BTA-174084; R-BTA-5689603; R-BTA-6798695; R-BTA-68827	Autodegradation of Cdh1 by Cdh1:APC/C; UCH proteinases; Neutrophil degranulation; CDT1 association with the CDC6:ORC:origin complex
TRINITY_DN10296_c0_g1_i1					PF00096.26; PF12171.8; PF13909.6; PF12874.7; PF13894.6; PF13465.6
TRINITY_DN102961_c0_g1_i1	sp|P70490|MFGM_RAT	P70490	GO:0043277; GO:0005178; GO:0019897; GO:0043627; GO:0007155; GO:0001786; GO:0005576; GO:0008284; GO:0006910; GO:0001525; GO:0050766; GO:0007338; GO:0006911; GO:0008429; GO:0016020; GO:0005615; GO:0009897	Lactadherin OS=Rattus norvegicus OX=10116 GN=Mfge8 PE=2 SV=1	PF00754.25	6573_0:004441	14123at6447	uncharacterized protein LOC101852598	R-RNO-381426; R-RNO-8957275	Regulation of Insulin-like Growth Factor (IGF) transport and uptake by Insulin-like Growth Factor Binding Proteins (IGFBPs); Post-translational protein phosphorylation
TRINITY_DN10297_c0_g1_i1					PF05086.12	29159_0:0007c8	14411at6447	uncharacterized protein LOC105347452
TRINITY_DN102972_c0_g1_i1	sp|Q9DED4|CIRBB_XENLA	Q9DED4	GO:0003730; GO:0045727; GO:0043022; GO:0009409; GO:0003676; GO:0005654; GO:0007275; GO:0005737; GO:0003729; GO:0003723; GO:0009792; GO:0005515; GO:0022008; GO:0005634; GO:0019899; GO:0016477; GO:0048793; GO:0048255	Cold-inducible RNA-binding protein B OS=Xenopus laevis OX=8355 GN=cirbp-b PE=1 SV=1		29159_0:0053f0	11382at6447	uncharacterized protein LOC105317230
TRINITY_DN10298_c0_g2_i2	sp|Q7JK24|B3GT1_GORGO	Q7JK24	GO:0047275; GO:0008532; GO:0016757; GO:0009312; GO:0008499; GO:0030259; GO:0030311; GO:0016758; GO:0016740; GO:0016021; GO:0005794; GO:0006682; GO:0008375; GO:0016020; GO:0006486; GO:0008376; GO:0000139	Beta-1,3-galactosyltransferase 1 OS=Gorilla gorilla gorilla OX=9595 GN=B3GALT1 PE=3 SV=1	PF01762.21; PF02434.16; PF13755.6	29159_0:002de7	1037602at2759	Hexosyltransferase
TRINITY_DN102989_c0_g1_i1						6565_0:0051f3	1757at6447	centrosomal protein of 162 kDa-like isoform X1
TRINITY_DN102990_c0_g1_i1	sp|Q08170|SRSF4_HUMAN	Q08170	GO:0008380; GO:0003676; GO:0005654; GO:0006405; GO:0003723; GO:0006406; GO:0000375; GO:0006397; GO:0005634; GO:0000398; GO:0031124	Serine/arginine-rich splicing factor 4 OS=Homo sapiens OX=9606 GN=SRSF4 PE=1 SV=2		29159_0:003ea4	1315388at2759	serine/arginine-rich splicing factor 6	R-HSA-159236; R-HSA-72163; R-HSA-72187; R-HSA-73856	Transport of Mature mRNA derived from an Intron-Containing Transcript; mRNA Splicing - Major Pathway; mRNA 3'-end processing; RNA Polymerase II Transcription Termination
TRINITY_DN102994_c0_g1_i1						50429_0:0029ae	195413at33208	uncharacterized protein K02A2.6-like
TRINITY_DN102995_c0_g1_i1					PF18065.1
TRINITY_DN103_c0_g2_i2					PF00076.22
TRINITY_DN103_c0_g3_i2	sp|P22232|FBRL_XENLA	P22232	GO:0006364; GO:1990259; GO:0032259; GO:0005654; GO:0003723; GO:0016740; GO:0005634; GO:0031167; GO:1990258; GO:0008168; GO:0005730	rRNA 2'-O-methyltransferase fibrillarin OS=Xenopus laevis OX=8355 GN=fbl PE=2 SV=1	PF01269.17; PF01135.19; PF08704.10; PF01189.17; PF05219.12; PF01728.19	6573_0:0045f4	1411035at2759	rRNA 2'-O-methyltransferase fibrillarin
TRINITY_DN103_c0_g6_i1	sp|Q6UFZ3|143G1_ONCMY	Q6UFZ3	GO:0005737	14-3-3 protein gamma-1 OS=Oncorhynchus mykiss OX=8022 PE=2 SV=1	PF11527.8; PF00244.20; PF01674.18	8010_0:002179	1176818at2759	14-3-3 protein
TRINITY_DN103_c3_g1_i1	sp|Q5FW12|TIPRL_XENTR	Q5FW12	GO:0005737; GO:0005829; GO:0043009; GO:0043066; GO:0043666; GO:0031929	TIP41-like protein OS=Xenopus tropicalis OX=8364 GN=tiprl PE=2 SV=1	PF04176.13	6565_0:0059f1	1377237at2759	TIP41-like protein
TRINITY_DN103_c4_g2_i1	sp|Q92005|EF1A_DANRE	Q92005	GO:0000166; GO:0006414; GO:0005737; GO:0003924; GO:0003746; GO:0006412; GO:0005525	Elongation factor 1-alpha OS=Danio rerio OX=7955 GN=eef1a PE=2 SV=1	PF03144.25; PF01926.23; PF00350.23; PF00009.27; PF14578.6; PF04670.12; PF13555.6; PF03143.17	6565_0:000415	1150082at2759	Elongation factor 1-alpha
TRINITY_DN103_c5_g2_i2	sp|Q5XI22|THIC_RAT	Q5XI22	GO:0016746; GO:0007420; GO:0006695; GO:0006635; GO:0038183; GO:0005737; GO:0016740; GO:0045797; GO:0001889; GO:0003985; GO:0005829; GO:0006631; GO:0005777; GO:0071398; GO:0046952; GO:0005739; GO:0019408; GO:0031670	Acetyl-CoA acetyltransferase, cytosolic OS=Rattus norvegicus OX=10116 GN=Acat2 PE=1 SV=1	PF00109.26; PF08541.10; PF08545.10; PF08445.10; PF00108.23; PF02803.18	6526_0:001792	1129049at2759	Thiolase
TRINITY_DN1030_c0_g1_i2	sp|Q2KIK0|SGT1_BOVIN	Q2KIK0	GO:0050821; GO:0005737; GO:0005634	Protein SGT1 homolog OS=Bos taurus OX=9913 GN=SUGT1 PE=2 SV=1	PF13428.6; PF10516.9; PF04212.18; PF13374.6; PF05002.15; PF04969.16; PF00515.28; PF09295.10; PF13371.6; PF07719.17; PF12895.7; PF16789.5; PF13424.6; PF14853.6; PF13181.6; PF18119.1; PF13414.6; PF13432.6; PF13176.6; PF13431.6; PF14559.6	6573_0:003049	1426397at2759	protein SGT1 homolog	R-BTA-844456	The NLRP3 inflammasome
TRINITY_DN10300_c0_g1_i2	sp|Q9D903|EBP2_MOUSE	Q9D903	GO:0006364; GO:0042254; GO:0030687; GO:0005694; GO:0034399; GO:0005634; GO:0042273; GO:0005730	Probable rRNA-processing protein EBP2 OS=Mus musculus OX=10090 GN=Ebna1bp2 PE=2 SV=1	PF05890.12	6573_0:000534	1154126at2759	probable rRNA-processing protein EBP2	R-MMU-6791226	Major pathway of rRNA processing in the nucleolus and cytosol
TRINITY_DN10300_c0_g2_i2	sp|Q99848|EBP2_HUMAN	Q99848	GO:0006364; GO:0042254; GO:0030687; GO:0005694; GO:0034399; GO:0003723; GO:0005515; GO:0005634; GO:0042273; GO:0005730	Probable rRNA-processing protein EBP2 OS=Homo sapiens OX=9606 GN=EBNA1BP2 PE=1 SV=2	PF10310.9; PF05890.12	6565_0:00105a	1154126at2759	probable rRNA-processing protein EBP2	R-HSA-6791226	Major pathway of rRNA processing in the nucleolus and cytosol
TRINITY_DN10301_c0_g2_i3	sp|Q9ULM3|YETS2_HUMAN	Q9ULM3	GO:0000122; GO:0045892; GO:0006355; GO:0017025; GO:0072686; GO:0005515; GO:0140030; GO:0005634; GO:0042393; GO:0005671; GO:0043966	YEATS domain-containing protein 2 OS=Homo sapiens OX=9606 GN=YEATS2 PE=1 SV=2	PF03366.16; PF04104.14	6565_0:000592	1482359at2759	YEATS domain-containing protein 4	R-HSA-3214847	HATs acetylate histones
TRINITY_DN10301_c0_g3_i9					PF04857.20; PF02023.17	6565_0:007e32	1072875at2759	Transposase family Tnp2 protein
TRINITY_DN103013_c0_g1_i1	sp|Q5ZLM0|CDC73_CHICK	Q5ZLM0	GO:0034402; GO:0016570; GO:0000122; GO:0045638; GO:0007049; GO:0008285; GO:0071222; GO:0032968; GO:0006368; GO:0016593; GO:0031442; GO:0006357; GO:0000993; GO:0001711; GO:0005634; GO:1902808; GO:0030177; GO:0006378; GO:0019827; GO:2000134; GO:0043066	Parafibromin OS=Gallus gallus OX=9031 GN=CDC73 PE=2 SV=1		6526_0:0020e9	2808at6447	parafibromin-like	R-GGA-201722; R-GGA-674695; R-GGA-75955	Formation of the beta-catenin:TCF transactivating complex; RNA Polymerase II Pre-transcription Events; RNA Polymerase II Transcription Elongation
TRINITY_DN103016_c0_g1_i1	sp|P98157|LRP1_CHICK	P98157	GO:0006897; GO:0005509; GO:0016021; GO:0046872; GO:0016964; GO:0016020; GO:0005905	Low-density lipoprotein receptor-related protein 1 OS=Gallus gallus OX=9031 GN=LRP1 PE=2 SV=1		188344_0:002f1a	1326at33208	low-density lipoprotein receptor-related protein 2
TRINITY_DN103019_c0_g1_i1	sp|Q9D552|SPT17_MOUSE	Q9D552	GO:0005737; GO:0005575; GO:0005516; GO:0008150	Spermatogenesis-associated protein 17 OS=Mus musculus OX=10090 GN=Spata17 PE=2 SV=1		29159_0:0022fd	1199557at2759	spermatogenesis-associated protein 17
TRINITY_DN10302_c0_g1_i2	sp|Q9Z2D0|MTMR9_MOUSE	Q9Z2D0	GO:0032991; GO:0010922; GO:0006897; GO:0005783; GO:0005737; GO:0042995; GO:0005886; GO:0005515; GO:0005829; GO:0030234; GO:0010507; GO:0016020; GO:0019903; GO:0050821; GO:0060304	Myotubularin-related protein 9 OS=Mus musculus OX=10090 GN=Mtmr9 PE=1 SV=2	PF15796.5; PF02893.20; PF06602.14	6573_0:001fbe	1833at6447	Myotubularin-related protein 9	R-MMU-1660499	Synthesis of PIPs at the plasma membrane
TRINITY_DN103025_c0_g1_i1						7574_0:005639	21500at1206795	anosmin-1
TRINITY_DN103027_c0_g1_i1	sp|Q66J54|S226A_XENLA	Q66J54	GO:0055085; GO:0016020; GO:0016021; GO:0005886; GO:0022857	Solute carrier family 22 member 6-A OS=Xenopus laevis OX=8355 GN=slc22a6-a PE=2 SV=1		225164_0:0050ee	386678at33208	solute carrier family 22 member 20
TRINITY_DN10303_c0_g2_i3	sp|Q02505|MUC3A_HUMAN	Q02505	GO:0005796; GO:0005576; GO:0016021; GO:0005886; GO:0016020; GO:0002223	Mucin-3A OS=Homo sapiens OX=9606 GN=MUC3A PE=1 SV=3	PF01390.20	6573_0:003c06	1531730at2759	mucin-17	R-HSA-5083625; R-HSA-5083632; R-HSA-5083636; R-HSA-5621480; R-HSA-913709; R-HSA-977068	Defective GALNT3 causes familial hyperphosphatemic tumoral calcinosis (HFTC); Defective C1GALT1C1 causes Tn polyagglutination syndrome (TNPS); Defective GALNT12 causes colorectal cancer 1 (CRCS1); Dectin-2 family; O-linked glycosylation of mucins; Termination of O-glycan biosynthesis
TRINITY_DN103031_c0_g1_i1						29159_0:005326	120652at33208	Ribonuclease H superfamily
TRINITY_DN103037_c0_g1_i1					PF11331.8; PF16533.5; PF00096.26; PF16159.5; PF18112.1; PF12171.8; PF12756.7; PF12898.7; PF06943.12; PF12874.7; PF04296.13; PF13894.6; PF17032.5; PF15909.5
TRINITY_DN103039_c0_g1_i1	sp|P51945|CCNG1_MOUSE	P51945	GO:0016538; GO:0007095; GO:0051726; GO:0048471; GO:0000079; GO:0005737; GO:0051301; GO:0044772; GO:0005634; GO:0030425; GO:0043025; GO:0000307; GO:0006949; GO:0007049; GO:0043066	Cyclin-G1 OS=Mus musculus OX=10090 GN=Ccng1 PE=2 SV=2		6573_0:0053f6	1015714at2759	cyclin-G1	R-MMU-6804757	Regulation of TP53 Degradation
TRINITY_DN103044_c0_g1_i1					PF01312.19	37653_0:003114	2106at6447	protein ced-11-like
TRINITY_DN103049_c0_g1_i1	sp|Q6VAB6|KSR2_HUMAN	Q6VAB6	GO:0000166; GO:0106310; GO:0007265; GO:0005524; GO:0004672; GO:0005737; GO:0007165; GO:0004674; GO:0006468; GO:0016740; GO:0106311; GO:0016310; GO:0005886; GO:0046872; GO:0005829; GO:0019722; GO:0005515; GO:0035556; GO:0016020; GO:0016301	Kinase suppressor of Ras 2 OS=Homo sapiens OX=9606 GN=KSR2 PE=1 SV=2		123851_0:00046a	146946at33208	kinase suppressor of Ras 2	R-HSA-5674135; R-HSA-6802946; R-HSA-6802948; R-HSA-6802949; R-HSA-6802952; R-HSA-6802955	MAP2K and MAPK activation; Signaling by moderate kinase activity BRAF mutants; Signaling by high-kinase activity BRAF mutants; Signaling by RAS mutants; Signaling by BRAF and RAF fusions; Paradoxical activation of RAF signaling by kinase inactive BRAF
TRINITY_DN10305_c0_g1_i9	sp|Q9UPX0|TUTLB_HUMAN	Q9UPX0	GO:0043005; GO:0045211; GO:0099629; GO:0007155; GO:0016021; GO:0005886; GO:0098982; GO:0030054; GO:0007399; GO:0045202; GO:0014069; GO:0016020	Protein turtle homolog B OS=Homo sapiens OX=9606 GN=IGSF9B PE=2 SV=2	PF16656.5; PF01108.17; PF00041.21; PF10342.9; PF04341.12; PF06305.11	43151_0:00260d	141865at33208	Immunoglobulin-like domain
TRINITY_DN10307_c0_g1_i2					PF08800.10
TRINITY_DN103071_c0_g1_i1						407821_0:002ca6	134752at6656	Myosin-2 essential light chain
TRINITY_DN103074_c0_g1_i1	sp|Q5RID7|SNX17_DANRE	Q5RID7	GO:0005769; GO:0008289; GO:0005768; GO:0007165; GO:0005737; GO:1990126; GO:0006886; GO:0015031; GO:0030659; GO:0005829; GO:0031410; GO:0016020; GO:0035091	Sorting nexin-17 OS=Danio rerio OX=7955 GN=snx17 PE=2 SV=1		6565_0:00006d	263172at33208	sorting nexin-17
TRINITY_DN10309_c0_g1_i6	sp|Q1LZ71|LFG2_BOVIN	Q1LZ71	GO:0043523; GO:2001234; GO:0045211; GO:0021549; GO:0005783; GO:0021702; GO:0045121; GO:0006915; GO:0002931; GO:0016021; GO:0005886; GO:0043524; GO:0005794; GO:0030054; GO:0045202; GO:0016020; GO:0021680; GO:0021681	Protein lifeguard 2 OS=Bos taurus OX=9913 GN=FAIM2 PE=2 SV=1		6565_0:0001e1	1290306at2759	protein lifeguard 1
TRINITY_DN1031_c0_g1_i3	sp|O60244|MED14_HUMAN	O60244	GO:0003712; GO:0003713; GO:0005654; GO:0019827; GO:0030374; GO:0042809; GO:0016592; GO:0060261; GO:0060260; GO:0005515; GO:0045944; GO:0005634; GO:0006357; GO:0045893	Mediator of RNA polymerase II transcription subunit 14 OS=Homo sapiens OX=9606 GN=MED14 PE=1 SV=2	PF08638.11	6573_0:001b3e	1215335at2759	mediator of RNA polymerase II transcription subunit 14	R-HSA-1989781; R-HSA-212436; R-HSA-381340; R-HSA-381340	PPARA activates gene expression; Generic Transcription Pathway; Transcriptional regulation of white adipocyte differentiation; Transcriptional regulation of white adipocyte differentiation
TRINITY_DN1031_c0_g3_i1					PF00169.29
TRINITY_DN103101_c0_g1_i1						6573_0:002921	10593at6447	protein mab-21-like 2
TRINITY_DN10311_c0_g1_i11	sp|Q8VHS2|CRUM1_MOUSE	Q8VHS2	GO:0061024; GO:0045177; GO:0005509; GO:0042995; GO:0005737; GO:0005902; GO:0010842; GO:0007601; GO:0005576; GO:0007157; GO:0042462; GO:0016021; GO:0005886; GO:0030054; GO:0016020; GO:0045197; GO:0032991	Protein crumbs homolog 1 OS=Mus musculus OX=10090 GN=Crb1 PE=1 SV=3	PF12947.7; PF00008.27; PF07645.15; PF07974.13; PF12662.7; PF14670.6; PF12946.7; PF08693.10; PF12661.7	45351_0:0013b6	1353508at2759	EGF-like domain-containing protein
TRINITY_DN103114_c0_g1_i1	sp|P60882|MEGF8_MOUSE	P60882	GO:0009888; GO:0097094; GO:0061371; GO:0005509; GO:0007368; GO:0042074; GO:0060976; GO:0016021; GO:0005634; GO:0003674; GO:0055113; GO:0035108; GO:0016020; GO:0071907; GO:0045879; GO:0060972; GO:0009887	Multiple epidermal growth factor-like domains protein 8 OS=Mus musculus OX=10090 GN=Megf8 PE=1 SV=2		225164_0:00235f	32816at33208	attractin-like protein 1
TRINITY_DN103125_c0_g1_i1	sp|P49395|RS3A_APLCA	P49395	GO:0003735; GO:0022627; GO:0005840; GO:0006412; GO:0005737	40S ribosomal protein S3a OS=Aplysia californica OX=6500 GN=RPS3A PE=3 SV=2		32264_0:000398	100629at6656	40S ribosomal protein S3a
TRINITY_DN103133_c0_g1_i1	sp|Q0P464|MTHSD_DANRE	Q0P464	GO:0003676; GO:0005737; GO:0003723	Methenyltetrahydrofolate synthase domain-containing protein OS=Danio rerio OX=7955 GN=mthfsd PE=2 SV=1		29159_0:0010f8	1137978at2759	methenyltetrahydrofolate synthase domain-containing protein
TRINITY_DN103135_c0_g1_i1	sp|Q0MQD0|NDUB3_PONPY	Q0MQD0	GO:0070469; GO:0032981; GO:0005743; GO:0005739; GO:0005747; GO:0016021; GO:0016020; GO:0022900	NADH dehydrogenase [ubiquinone] 1 beta subcomplex subunit 3 OS=Pongo pygmaeus OX=9600 GN=NDUFB3 PE=3 SV=3		37621_0:00199e	1568057at2759	NADH dehydrogenase
TRINITY_DN10314_c0_g1_i1	sp|P21328|RTJK_DROME	P21328	GO:0016779; GO:0006278; GO:0003964; GO:0016740	RNA-directed DNA polymerase from mobile element jockey OS=Drosophila melanogaster OX=7227 GN=pol PE=1 SV=1	PF00078.27	6565_0:00339f	15460at6447	uncharacterized protein LOC111118861
TRINITY_DN103141_c0_g1_i1					PF15151.6; PF15244.6
TRINITY_DN103148_c0_g1_i1	sp|Q60847|COCA1_MOUSE	Q60847	GO:0005581; GO:0062023; GO:0005595; GO:0007155; GO:0005576; GO:0030020; GO:0035987; GO:0005615	Collagen alpha-1(XII) chain OS=Mus musculus OX=10090 GN=Col12a1 PE=2 SV=3		6573_0:001d76	1049829at2759	collagen alpha-6(VI) chain	R-MMU-1442490; R-MMU-1650814; R-MMU-2022090; R-MMU-8948216	Collagen degradation; Collagen biosynthesis and modifying enzymes; Assembly of collagen fibrils and other multimeric structures; Collagen chain trimerization
TRINITY_DN10315_c0_g1_i4	sp|Q5ZK69|PAAF1_CHICK	Q5ZK69	GO:0000502	Proteasomal ATPase-associated factor 1 OS=Gallus gallus OX=9031 GN=PAAF1 PE=2 SV=1	PF02239.16; PF11715.8; PF12894.7; PF13570.6; PF17005.5; PF00400.32; PF16529.5	225164_0:0030aa	4266at6447	proteasomal ATPase-associated factor 1-like
TRINITY_DN103151_c0_g1_i1						6565_0:005b13	1246at6447	glutamate receptor ionotropic, kainate 2
TRINITY_DN103153_c0_g1_i1	sp|P14381|YTX2_XENLA	P14381		Transposon TX1 uncharacterized 149 kDa protein OS=Xenopus laevis OX=8355 PE=4 SV=1	PF00078.27	7668_0:005200	191391at2759	Reverse transcriptase
TRINITY_DN103154_c0_g1_i1						6565_0:00110a	10040at1206795	activating transcription factor 7-interacting protein 1-like isoform X1
TRINITY_DN10316_c0_g1_i1					PF10046.9; PF06005.12; PF04977.15; PF13851.6; PF11068.8; PF17098.5; PF13920.6; PF16799.5; PF06156.13; PF07889.12; PF12325.8; PF05837.12; PF11932.8	7739_0:003b00
TRINITY_DN103160_c0_g1_i1	sp|Q9H5Z1|DHX35_HUMAN	Q9H5Z1	GO:0005681; GO:0001701; GO:0008380; GO:0000166; GO:0016887; GO:0016787; GO:0004386; GO:0071013; GO:0005524; GO:0003723; GO:0006397; GO:0003724; GO:0000398	Probable ATP-dependent RNA helicase DHX35 OS=Homo sapiens OX=9606 GN=DHX35 PE=1 SV=2		7574_0:001834	1468at1206795	probable ATP-dependent RNA helicase DHX35
TRINITY_DN103162_c0_g1_i1	sp|P13418|POLS_CRPVC	P13418	GO:0005198; GO:0019028; GO:0030430; GO:0019012	Structural polyprotein OS=Cricket paralysis virus (isolate Teleogryllus commodus/Australia/CrPVVIC/1968) OX=928300 PE=1 SV=2
TRINITY_DN103174_c0_g1_i1	sp|O94967|WDR47_HUMAN	O94967	GO:0005737; GO:0005515; GO:0007275; GO:0005856; GO:0005874	WD repeat-containing protein 47 OS=Homo sapiens OX=9606 GN=WDR47 PE=1 SV=1		6573_0:004fd9	130769at33208	WD repeat-containing protein 47 isoform X1
TRINITY_DN10318_c0_g1_i2					PF03336.13; PF13640.6; PF13661.6	6573_0:0044c9	1438683at2759	transmembrane prolyl 4-hydroxylase
TRINITY_DN103186_c0_g1_i1	sp|Q2PQH8|GDE_CANLF	Q2PQH8	GO:0016757; GO:0016787; GO:0005737; GO:0016740; GO:0004134; GO:0016798; GO:0102500; GO:0005978; GO:0008152; GO:0003824; GO:0004135; GO:0005980; GO:0005975	Glycogen debranching enzyme OS=Canis lupus familiaris OX=9615 GN=AGL PE=2 SV=1	PF06202.14	29159_0:002196	1488838at2759	glycogen debranching enzyme-like
TRINITY_DN103189_c0_g1_i1	sp|O43435|TBX1_HUMAN	O43435	GO:0048538; GO:0003677; GO:0001708; GO:0000785; GO:0000978; GO:0006355; GO:0042803; GO:0007275; GO:0048701; GO:0003700; GO:0045596; GO:0000981; GO:1990837; GO:0005515; GO:0005634; GO:0060017; GO:0097152; GO:2000027; GO:0006357; GO:0045893; GO:0043565	T-box transcription factor TBX1 OS=Homo sapiens OX=9606 GN=TBX1 PE=1 SV=1		6573_0:003f76	1185429at2759	T-box transcription factor TBX10
TRINITY_DN10319_c0_g1_i9	sp|Q8TF76|HASP_HUMAN	Q8TF76	GO:0005694; GO:0005524; GO:0005737; GO:0016740; GO:0106311; GO:0005813; GO:0071459; GO:0006468; GO:0005634; GO:0006325; GO:0005819; GO:0005856; GO:0072354; GO:0004672; GO:0004674; GO:0016310; GO:0005515; GO:0007064; GO:0106310; GO:2000751; GO:0007049; GO:0016301	Serine/threonine-protein kinase haspin OS=Homo sapiens OX=9606 GN=HASPIN PE=1 SV=3	PF00069.25; PF01636.23; PF12330.8	7574_0:002633	1374355at2759	serine/threonine-protein kinase haspin
TRINITY_DN103190_c0_g1_i1						225164_0:004b6f	551849at2759	Integrator complex subunit 6
TRINITY_DN1032_c0_g1_i5	sp|P05099|MATN1_CHICK	P05099	GO:0005509; GO:0005201; GO:0005576; GO:0062023	Cartilage matrix protein OS=Gallus gallus OX=9031 GN=MATN1 PE=1 SV=2	PF01456.17; PF13768.6; PF13519.6; PF07002.16; PF06933.11; PF10138.9; PF00092.28	6573_0:001d72	13909at6447	cartilage matrix protein-like
TRINITY_DN10321_c0_g1_i3	sp|Q9VVT5|DTBP1_DROME	Q9VVT5	GO:0048047; GO:0008344; GO:1900073; GO:0005737; GO:0098527; GO:0050807; GO:0008057; GO:0008355; GO:0051968; GO:0031083; GO:0007616; GO:0045963; GO:0048167; GO:0007614; GO:0008021; GO:0036466; GO:0005515	Dysbindin protein homolog OS=Drosophila melanogaster OX=7227 GN=Dysb PE=1 SV=1	PF17107.5	6573_0:00067e	11017at6447	dysbindin-like
TRINITY_DN103217_c0_g1_i1						6573_0:0055cd	19416at6447	uncharacterized protein LOC109617447
TRINITY_DN10322_c0_g1_i1	sp|Q9LDU6|ST7R_ARATH	Q9LDU6	GO:0030176; GO:0016126; GO:0006694; GO:0047598; GO:0006695; GO:0008202; GO:0016627; GO:0005783; GO:0016491; GO:0006629; GO:0016021; GO:0005886; GO:0016628; GO:0005794; GO:0005634; GO:0016020; GO:0008203; GO:0009918; GO:0016132	7-dehydrocholesterol reductase OS=Arabidopsis thaliana OX=3702 GN=DWF5 PE=1 SV=1	PF07274.12; PF06966.12; PF01222.17	29159_0:000118	2904at6447	7-dehydrocholesterol reductase-like
TRINITY_DN103224_c0_g1_i1						6850_0:00005c	2171at2759	EGF-like calcium-binding, conserved site
TRINITY_DN10323_c0_g1_i2	sp|P23416|GLRA2_HUMAN	P23416	GO:0050877; GO:0005887; GO:0007268; GO:0034220; GO:0043005; GO:0071294; GO:0030594; GO:0007165; GO:0042391; GO:0071230; GO:0007218; GO:0016594; GO:0071361; GO:1902476; GO:0022852; GO:0060012; GO:0045202; GO:0016934; GO:0043200; GO:0005254	Glycine receptor subunit alpha-2 OS=Homo sapiens OX=9606 GN=GLRA2 PE=1 SV=1	PF09125.10; PF02932.16; PF07843.11; PF02931.23	6573_0:000fd5	276914at33208	Neurotransmitter-gated ion-channel	R-HSA-112314	Neurotransmitter receptors and postsynaptic signal transmission
TRINITY_DN103231_c0_g1_i1	sp|Q9VR07|INE_DROME	Q9VR07	GO:0050891; GO:0006836; GO:0019226; GO:0015293; GO:0016323; GO:0009414; GO:0007275; GO:0030154; GO:0016021; GO:0005886; GO:0005034; GO:0007399; GO:0016020; GO:0047484; GO:0042066; GO:0005328	Sodium- and chloride-dependent GABA transporter ine OS=Drosophila melanogaster OX=7227 GN=ine PE=1 SV=1		6500_0:0028fa	2033at6447	Transporter
TRINITY_DN103235_c0_g1_i1					PF12717.7; PF05918.11; PF13646.6; PF02985.22	6500_0:00353e	10258at6447	uncharacterized protein LOC110449844
TRINITY_DN10324_c0_g1_i1					PF12435.8	29159_0:006160	15779at6447	uncharacterized protein LOC111126637
TRINITY_DN103241_c0_g1_i1	sp|Q9UBQ7|GRHPR_HUMAN	Q9UBQ7	GO:0016618; GO:0005782; GO:0008465; GO:0042803; GO:0005737; GO:0070402; GO:0046487; GO:0070062; GO:0005829; GO:0019752; GO:0030267; GO:0016491; GO:1902494	Glyoxylate reductase/hydroxypyruvate reductase OS=Homo sapiens OX=9606 GN=GRHPR PE=1 SV=1		6565_0:0021f7	1378766at2759	D-isomer specific 2-hydroxyacid dehydrogenase, NAD-binding domain	R-HSA-389661	Glyoxylate metabolism and glycine degradation
TRINITY_DN103246_c0_g1_i1					PF14957.6; PF07133.11; PF06459.12; PF00858.24; PF04145.15
TRINITY_DN103267_c0_g1_i1	sp|Q5ND34|WDR81_MOUSE	Q5ND34	GO:0006511; GO:0005765; GO:0070530; GO:0035973; GO:0035014; GO:0005737; GO:0005739; GO:0031902; GO:0045022; GO:0005764; GO:0000421; GO:0031901; GO:0010923; GO:0043551; GO:0005829; GO:0031410; GO:0005768; GO:0016020; GO:0050821; GO:0031313	WD repeat-containing protein 81 OS=Mus musculus OX=10090 GN=Wdr81 PE=1 SV=2		6573_0:004f3b	101142at2759	WD40-repeat-containing domain
TRINITY_DN10327_c0_g1_i2						225164_0:004845	1526882at2759	IFI6/IFI27-like domain superfamily
TRINITY_DN10327_c0_g2_i5					PF06140.13	225164_0:004845	1526882at2759	IFI6/IFI27-like domain superfamily
TRINITY_DN10327_c0_g3_i1						225164_0:004845	1526882at2759	IFI6/IFI27-like domain superfamily
TRINITY_DN103270_c0_g1_i1	sp|Q4N3P0|RS8_THEPA	Q4N3P0	GO:0003735; GO:0005840; GO:0006412	40S ribosomal protein S8 OS=Theileria parva OX=5875 GN=RPS8 PE=3 SV=1		1720309_0:001785	1278610at2759	40S ribosomal protein S8
TRINITY_DN10328_c0_g1_i1						29159_0:0046a1
TRINITY_DN10328_c0_g2_i4	sp|A6NGH8|ANR61_HUMAN	A6NGH8	GO:0005654	Ankyrin repeat domain-containing protein 61 OS=Homo sapiens OX=9606 GN=ANKRD61 PE=4 SV=2	PF00023.30; PF13637.6; PF13857.6; PF12796.7; PF13606.6; PF11471.8	56086_0:001184	104110at6656	Ankyrin repeat-containing domain
TRINITY_DN103283_c0_g1_i1	sp|Q5MGA9|NAP1C_ORYSI	Q5MGA9	GO:0006334; GO:0005737; GO:0005634	Nucleosome assembly protein 1;3 OS=Oryza sativa subsp. indica OX=39946 GN=NAP1;3 PE=1 SV=2		89399_0:004db0	1216172at2759	Nucleosome assembly protein
TRINITY_DN10329_c0_g2_i1	sp|C3YWU0|FUCO_BRAFL	C3YWU0	GO:0016787; GO:0016139; GO:0005576; GO:0005764; GO:0016798; GO:0008152; GO:0006004; GO:0004560; GO:0005975	Alpha-L-fucosidase OS=Branchiostoma floridae OX=7739 GN=BRAFLDRAFT_56888 PE=3 SV=2	PF01120.17; PF16757.5; PF04684.13	6565_0:001226	253307at33208	tissue alpha-L-fucosidase
TRINITY_DN1033_c0_g1_i1	sp|Q7PS12|MOEH_ANOGA	Q7PS12	GO:0003779; GO:0005856; GO:0005737; GO:0045197; GO:0005886; GO:0030054; GO:0008092; GO:0016020; GO:0005912	Moesin/ezrin/radixin homolog 1 OS=Anopheles gambiae OX=7165 GN=Moe PE=3 SV=5	PF06785.11; PF13476.6; PF12220.8; PF02670.16; PF09766.9; PF09380.10	6565_0:005d3d	2264at6447	merlin-like
TRINITY_DN1033_c0_g2_i2	sp|Q32LP2|RADI_BOVIN	Q32LP2	GO:0010628; GO:0034260; GO:0030335; GO:2000643; GO:0045792; GO:0005737; GO:0005886; GO:0008092; GO:0016020; GO:1902966; GO:0071944; GO:0034111; GO:0072659; GO:0051693; GO:0005856; GO:0042995; GO:1900027; GO:0008361; GO:0003779; GO:0032231; GO:0005902; GO:0061028; GO:1903364	Radixin OS=Bos taurus OX=9913 GN=RDX PE=2 SV=1	PF09379.10; PF00887.19; PF00769.19; PF00373.18; PF09380.10	29159_0:000761	2264at6447	merlin-like
TRINITY_DN1033_c0_g4_i1	sp|Q2HJ49|MOES_BOVIN	Q2HJ49	GO:0010628; GO:0016323; GO:0005737; GO:0022614; GO:0005886; GO:0071803; GO:0030175; GO:0016020; GO:0001931; GO:0042098; GO:0007159; GO:0048471; GO:0071944; GO:0005856; GO:0045177; GO:0042995; GO:0008361; GO:0050900; GO:0072678; GO:0008360; GO:0005902; GO:0061028; GO:0071394	Moesin OS=Bos taurus OX=9913 GN=MSN PE=2 SV=3		225400_0:0016a2	121235at32523	moesin
TRINITY_DN10331_c0_g1_i5	sp|P0CT41|TF212_SCHPO	P0CT41	GO:0003677; GO:0016787; GO:0006508; GO:0016779; GO:0003676; GO:0015074; GO:0004519; GO:0004190; GO:0016740; GO:0008233; GO:0003723; GO:0003964; GO:0046872; GO:0004518; GO:0008152; GO:0003887; GO:0003824; GO:0005575; GO:0006278; GO:0006310	Transposon Tf2-12 polyprotein OS=Schizosaccharomyces pombe (strain 972 / ATCC 24843) OX=284812 GN=Tf2-12 PE=3 SV=1	PF00078.27	6565_0:007d66	1779at6447	uncharacterized protein K02A2.6-like
TRINITY_DN103311_c0_g1_i1						6573_0:004f82	1318335at2759	Zinc finger C2H2 superfamily
TRINITY_DN103320_c0_g1_i1	sp|Q2TA16|DRC2_BOVIN	Q2TA16	GO:0036064; GO:0005856; GO:0042995; GO:0005737; GO:0005858; GO:0070286; GO:0003352; GO:0005930; GO:0031514; GO:0060285; GO:0005929; GO:0060271	Dynein regulatory complex subunit 2 OS=Bos taurus OX=9913 GN=CCDC65 PE=2 SV=1		29159_0:0004d2	3217at6447	coiled-coil domain-containing protein 65-like
TRINITY_DN103326_c0_g1_i1						29159_0:000926	1273709at2759	Thrombospondin-related anonymous protein, putative
[truncated: 30,127 more rows]

## Sheet: Table S3
Table S3: significantly enriched Gene Ontology biological process terms
digestive gland T1
GO term	total count	observed (DEG set)	FDR	observed-expected	GO ID	GO description
GO:0006897	137	12	2.16525e-07	10.5808	GO:0006897	endocytosis
GO:0007155	235	12	8.17878e-05	9.56562	GO:0007155	cell adhesion
GO:0008152	178	10	0.000144525	8.15609	GO:0008152	metabolic process
[truncated: 757 more rows]

## Sheet: Table S4
Table S4: significantly enriched Gene Ontology cellular component terms
[truncated: 526 more rows]

[truncated: 1 more sheets: Table S5]
